# Supplementary material for: Predicting risk of hospitalisation or death: a retrospective population-based analysis
Source: PubMed Central journal article supplement — BMJ Open. 2014 Sep 17;4(9):e005223. doi: 10.1136/bmjopen-2014-005223 (PMC4166245; doi:10.1136/bmjopen-2014-005223), 2014-09-17
Supplement: bmjopen-2014-005223.draft_revisions.pdf [file bmjopen-2014-005223.draft_revisions.pdf]

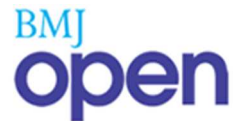

## Predicting Risk of Hospitalization Using a Population Based Longitudinal Database

|                                 |                                                                                                                                                                                                                                                                                                                                                                                                                                                                                                                                                                                                                                                                                                                                                                                                         |
|---------------------------------|---------------------------------------------------------------------------------------------------------------------------------------------------------------------------------------------------------------------------------------------------------------------------------------------------------------------------------------------------------------------------------------------------------------------------------------------------------------------------------------------------------------------------------------------------------------------------------------------------------------------------------------------------------------------------------------------------------------------------------------------------------------------------------------------------------|
| Journal:                        | <i>BMJ Open</i>                                                                                                                                                                                                                                                                                                                                                                                                                                                                                                                                                                                                                                                                                                                                                                                         |
| Manuscript ID:                  | bmjopen-2014-005223                                                                                                                                                                                                                                                                                                                                                                                                                                                                                                                                                                                                                                                                                                                                                                                     |
| Article Type:                   | Research                                                                                                                                                                                                                                                                                                                                                                                                                                                                                                                                                                                                                                                                                                                                                                                                |
| Date Submitted by the Author:   | 07-Mar-2014                                                                                                                                                                                                                                                                                                                                                                                                                                                                                                                                                                                                                                                                                                                                                                                             |
| Complete List of Authors:       | Louis, Daniel; Jefferson Medical College, Center for Research in Medical Education and Health Care<br>Robeson, Mary; Jefferson Medical College, Center for Research in Medical Education and Health Care<br>McAna, John; Thomas Jefferson University, Jefferson School of Population Health<br>Maio, Vittorio; Thomas Jefferson University, Jefferson School of Population Health<br>Keith, Scott; Thomas Jefferson University, Department of Pharmacology & Experimental Therapeutics, Division of Biostatistics<br>Liu, Mengdan; Jefferson Medical College, Center for Research in Medical Education and Health Care<br>Gonnella, Joseph; Jefferson Medical College, Center for Research in Medical Education and Health Care<br>Grilli, Roberto; Agenzia Sanitaria e Sociale Regione Emilia-Romagna, |
| <b>Primary Subject Heading</b>: | Health services research                                                                                                                                                                                                                                                                                                                                                                                                                                                                                                                                                                                                                                                                                                                                                                                |
| Secondary Subject Heading:      | Patient-centred medicine                                                                                                                                                                                                                                                                                                                                                                                                                                                                                                                                                                                                                                                                                                                                                                                |
| Keywords:                       | Quality in health care < HEALTH SERVICES ADMINISTRATION & MANAGEMENT, Organisation of health services < HEALTH SERVICES ADMINISTRATION & MANAGEMENT, Health policy < HEALTH SERVICES ADMINISTRATION & MANAGEMENT                                                                                                                                                                                                                                                                                                                                                                                                                                                                                                                                                                                        |
|                                 |                                                                                                                                                                                                                                                                                                                                                                                                                                                                                                                                                                                                                                                                                                                                                                                                         |

SCHOLARONE™  
Manuscripts

## Predicting Risk of Hospitalization Using a Population Based Longitudinal Database

Daniel Z. Louis<sup>1</sup>, Mary Robeson<sup>1</sup>, John McAna<sup>2</sup>, Vittorio Maio<sup>2</sup>, Scott W. Keith<sup>3</sup>, Mengdan Liu<sup>1</sup>, Joseph S. Gonnella<sup>1</sup>, Roberto Grilli<sup>4</sup>

<sup>1</sup>Center for Research in Medical Education and Health Care, Jefferson Medical College of Thomas Jefferson University. 1015 Walnut Street, Suite 319. Philadelphia, PA 19107, USA

<sup>2</sup>Jefferson School of Population Health, Thomas Jefferson University. 901 Walnut Street, 10<sup>th</sup> Floor. Philadelphia, PA 19107, USA

<sup>3</sup>Department of Pharmacology & Experimental Therapeutics, Division of Biostatistics, Thomas Jefferson University. 1015 Chestnut Street, Suite M-100. Philadelphia, PA 19107, USA

<sup>4</sup>Agenzia Sanitaria e Sociale Regione Emilia-Romagna, Viale Aldo Moro, 21. Bologna, 40128 Italy.

**Corresponding author:** Daniel Z. Louis, Jefferson Medical College, 1015 Walnut Street, Suite 319, Philadelphia, PA 19107. USA; Tel: 215-955-6959, [daniel.louis@jefferson.edu](mailto:daniel.louis@jefferson.edu)

**Copyright:** The corresponding author has the right to grant on behalf of all authors and does grant on behalf of all authors, an exclusive license (non-exclusive for Dr. Grilli as a government employee) on a worldwide basis to the BMJ publishing Group Ltd to permit this article (if accepted) to be published in BMJ editions and any other BMJ PGL products and sublicenses such use and exploit all subsidiary rights, as set out in our license.

## Abstract

**Objectives:** Develop predictive models using an administrative health care database that provide information for Patient Centered Medical Homes to proactively identify patients at risk of hospitalization for conditions that may be impacted through improved patient care.

**Design:** Retrospective health care utilization analysis with multivariate logistic regression models.

**Data:** A population-based longitudinal database of residents served by the Emilia-Romagna, Italy health service in the years 2004-2012 including demographic information and utilization of health services by 3,726,380 people age  $\geq 18$  years.

**Outcome measures:** Models designed to predict risk of hospitalization or death for problems that are potentially avoidable were developed and evaluated using the area under the receiver operating curve C-statistic, in terms of their sensitivity, specificity, and positive predictive value, and for calibration to assess performance across levels of predicted risk.

**Results:** Among the 3,726,380 adult residents of Emilia-Romagna at the end of 2011, 449,163 (12.1%) were hospitalized in 2012; 4.2% were hospitalized for the selected conditions or died in 2012 (3.6% hospitalized, 1.3% died). The C-statistic for the model predicting 2012 outcomes was 0.856. The model was well calibrated across categories of predicted risk. For those patients in the highest predicted risk decile group, the average predicted risk was 23.9% and the actual prevalence of hospitalization or death was 24.2%.

**Conclusions:** We have developed a population-based model using a longitudinal administrative database that identifies the risk of hospitalization for residents of the Emilia-Romagna region

1  
2  
3 with a level of performance as high as, or higher than, similar models. The results of this  
4  
5 model, along with profiles of patients identified as high risk are being provided to the physicians  
6  
7 and other health care professionals associated with the Patient Centered Medical Homes to aid in  
8  
9 planning for care management and interventions that may reduce their patients' likelihood of a  
10  
11 preventable, high-cost hospitalization.  
12  
13

### 14 15 16 17 18 **Strengths and Limitations of this study:** 19

- 20 • This study included the entire adult population of the Emilia-Romagna region of Italy,  
21 over 3.7 million people.
- 22 • The study used an existing longitudinal administrative health care database with both the  
23 advantage of much lower cost than new data collection and the disadvantage of potential  
24 errors in administrative data.
- 25 • The results of the study are being used to assist in the development of newly formed  
26 Patient Centered Medical Homes.  
27  
28  
29  
30  
31  
32

33 **Keywords:** hospitalization, risk, medical home, patient-centered care  
34

35 **Word Count:** 3,547 (excluding title page, abstract, references, figure, and tables.)  
36

37 **Contributions of authors:** DZL, RG, VM, and JSG were responsible for the conceptualization  
38 of this project. MR, JM, and ML were responsible for creation of the datasets used in this  
39 project. DZL, VM, MR, and JSG were responsible for the definition of analytical variables.  
40 SWK, MR, ML and JM were responsible for modeling and statistical analysis. DZL managed  
41 the research team. RG and JSG advised on the analyses and results. All authors contributed to  
42 the preparation of the manuscript.  
43  
44  
45

46 **Funding:** This research was funded by the Agenzia Sanitaria e Sociale of the Emilia-Romagna  
47 Region, Italy. The resulting models are being used by the Local Health Authority of Parma, Italy  
48 and the Patient Centered Medical Homes located in the Parm Local Health Authority.  
49  
50  
51  
52  
53  
54  
55  
56  
57

## Introduction

The predominant healthcare delivery system, which has been a passive model, reacting to patients' problems, is shifting to a more proactive model designed to take the initiative in providing care for an increasingly older population that has a greater prevalence of chronic conditions, often with multiple medical and social needs. These changes are driving the reorganization of the primary care system, emphasizing coordination and cooperation among healthcare professionals.<sup>1</sup> Among the approaches to addressing this need has been the establishment of primary care organizations incorporating integrated teams of physicians and other healthcare professionals that “seek to increase the influence of primary care professionals, and in particular general practitioners (GPs), in health planning and resource allocation.”<sup>2</sup> Prominent among these new models of primary care is the Patient Centered Medical Home, an organization in which a team of healthcare providers is engaged in delivering comprehensive, coordinated, patient-centered care to patient defined populations.<sup>3</sup>

Primary care has a central role in the Italian National Health Service (NHS). Twenty one regional governments are responsible for ensuring the delivery of a health benefits package through a network of geographically defined, population-based Local Health Authorities. Primary care physicians work for these authorities as independent contractors and act as “gatekeepers” for specialty and other referral services for their patients.<sup>4</sup>

With the belief that a strong primary care system is conducive to improving population health, the NHS initiated reforms that encouraged primary care physicians to organize into collaborative arrangements. To this end, the Regione Emilia-Romagna (RER), a large northern region with a population of about 4.5 million, has recently launched a plan in its 11 Local Health Authorities to

1  
2  
3 establish Patient-Centered Medical Homes to better coordinate patient care and help patients  
4  
5 avoid unnecessary hospitalizations.  
6  
7

8  
9 The identification of those patients who would benefit most from outreach efforts is fundamental  
10  
11 to achieving these goals of promoting and practicing population health in Patient-Centered  
12  
13 Medical Homes. To accomplish this, predictive models and risk stratification tools are needed to  
14  
15 identify patients at risk of a worsening of their health status. According to Knutson and Bella,<sup>5</sup>  
16  
17 “Predictive models are data-driven, decision-support tools that estimate an individual’s future  
18  
19 potential health care costs and/or opportunities for care management.” A good model will  
20  
21 identify as many of these patients as possible while excluding those for whom these interventions  
22  
23 would be unnecessary or ineffective.  
24  
25  
26  
27

28  
29 The RER has established three objectives for this project: 1) develop predictive models to  
30  
31 identify patients at high risk of a progression of their medical problems or who are at risk of  
32  
33 developing new medical problems, 2) create “risk of hospitalization” patient profiles that provide  
34  
35 information about their high-risk patients to the general practitioners in the newly formed  
36  
37 Patient-Centered Medical Homes, and 3) assess the extent to which these models and reports  
38  
39 provide additional information useful in the identification of patients who may benefit from case  
40  
41 management or disease management.  
42  
43  
44  
45

46  
47 This paper will address the first of the three goals. We describe the development of a predictive  
48  
49 model using the RER’s regional longitudinal administrative health care database to help identify  
50  
51 patients who are most at risk of hospitalization for conditions that may be impacted through  
52  
53 improved patient care. This model will then be used to inform the providers associated with the  
54  
55 Patient-Centered Medical Homes and aid in their planning for care management and  
56  
57

1  
2  
3 interventions that can reduce their patients' likelihood of a preventable, high-cost hospitalization.  
4  
5  
6  
7

## 8 Methods

### 9 Study Data and Study Population

10  
11  
12  
13  
14 The model was developed using the population-based longitudinal health care database of the  
15 residents served by the RER Health Service in the years 2004 through 2012.<sup>6</sup> This  
16 administrative database includes demographic information for all residents (gender, birth and  
17 death dates, location of current residence, and primary care physician), hospital discharge  
18 abstract data (ICD-9-CM diagnosis and procedure codes, and admission and discharge dates),  
19 emergency room utilization information, outpatient pharmacy data at the individual prescription  
20 level, specialty care (laboratory, diagnostics, therapeutic procedures, rehabilitation, and specialist  
21 visits), home health data, and information on each primary care physician in the region. Each  
22 patient has an anonymous identifier assigned by the RER so that an individual's utilization can  
23 be tracked over time without jeopardizing patient privacy.  
24  
25  
26  
27  
28  
29  
30  
31  
32  
33  
34  
35  
36  
37

38 The study population consisted of all residents of the RER who were at least 18 years of age and  
39 still alive as of 31st December 2011.  
40  
41  
42  
43  
44  
45  
46

### 47 Dependent Variable

48  
49 The dependent variable was defined as the occurrence of a hospitalization for problems that are  
50 potentially avoidable, or whose progression may have been avoided or delayed through  
51 appropriate patient care, or the death of the individual for any reason in 2012. We decided to not  
52  
53  
54  
55  
56  
57  
58  
59  
60

1  
2  
3 limit the hospitalization to emergency admissions, since a planned admission may also be an  
4  
5 indicator of a worsening medical problem. In order to operationally define the dependent  
6  
7 variable, we reviewed the Disease Staging<sup>7,8</sup> primary diagnostic category and severity stage of  
8  
9 all day and inpatient hospital admissions (for adults age 18+) in RER for one year, to select those  
10  
11 admissions that should be included in the dependent variable.  
12  
13

14  
15 Deliveries, admission for dental diseases or admissions for vague signs or symptoms with no  
16  
17 identified etiology were excluded. Admissions for problems that are not predictable/preventable  
18  
19 were excluded while those where screening may identify problems that can potentially be treated  
20  
21 to avoid progression were included. For example, admissions for stage 1, chronic cholecystitis  
22  
23 or cholelithiasis were excluded, but admissions for advanced stage 2 or 3 complications such as  
24  
25 ascending cholangitis or pancreatitis were included.  
26  
27  
28

29  
30 We felt that inclusion of hospitalization for cancer in the dependent variable should depend on  
31  
32 the ability to either prevent or avoid progression of the disease. We therefore included colon  
33  
34 cancer and cervical cancer in the definition because they are potentially preventable but excluded  
35  
36 all other cancers where prevention/prediction is not currently possible.  
37  
38  
39

40  
41 Inclusion of injuries, burns, or toxic reaction to prescription or non-prescription drugs would  
42  
43 ideally be based on the cause of these problems. Since the etiology of these problems is typically  
44  
45 not available in the administrative data being used in this project, we made the decision to  
46  
47 include or exclude based on our subjective judgment of the likelihood of preventability. For  
48  
49 example, adverse drug reactions were included but burns were excluded from the definition of  
50  
51 the dependent variable.  
52  
53  
54  
55  
56  
57  
58  
59  
60



1  
2  
3 There is no obvious medical reason for a hospital admission for patients with stage 1 diabetes  
4 mellitus or stage 1 essential hypertension without complications. These problems are typically  
5 treatable in the outpatient setting. A hospitalization implies a potential problem in the care of  
6 these patients, so we decided to include these admissions as a part of the dependent variable.<sup>9</sup>  
7  
8  
9  
10  
11  
12

### 13 14 15 16 17 18 Independent Variables 19

20 A broad range of candidate predictor variables was developed taking advantage of the RER  
21 administrative data. The independent variables used for modeling were defined from the RER  
22 administrative data for the years 2004 through 2011. Demographic data included patient age,  
23 sex, and geographic location of residence. We developed a mapping to broad disease categories  
24 defined primarily in terms of the affected body system from home health care data, pharmacy  
25 data, and hospital discharge abstract data. (See Appendix.)  
26  
27  
28  
29  
30  
31  
32  
33  
34  
35  
36

37 For those patients who had been hospitalized, more specific diagnostic data were available. We  
38 reviewed the classification of patients hospitalized historically using the Disease Staging  
39 diagnostic category and disease severity stages.<sup>7,8</sup> Based on the frequencies specific diagnostic  
40 category/stage predictor variables were defined for either specific stages of frequent diseases, or  
41 by combinations across similar categories. Predictor variables were defined based on the number  
42 of emergency room visits using the RER classifications system for the urgency of the visit.  
43  
44  
45  
46  
47  
48  
49  
50  
51  
52

53 Pharmacy data were used to identify polypharmacy<sup>10</sup> (defined as the simultaneous use of five or  
54 more active ingredients for at least 15 consecutive days), potential drug-drug interactions  
55  
56  
57  
58  
59  
60

1  
2  
3 (DDI)<sup>11</sup> and potentially inappropriate medication use in patients<sup>12</sup> 65 years and older. Since  
4  
5 cardiovascular disease is highly prevalent, we reviewed the use of cardiovascular drugs and  
6  
7 created a variable for each of the following 11 classes of drugs (oral anti-coagulants, beta-  
8  
9 blockers, angiotensin converting enzyme / angiotensin II receptor blockers, anti-platelets,  
10  
11 calcium channel blockers, anti-arrhythmics, digitalis glycosides, nitrates, diuretics, alfa-blockers,  
12  
13 statins) to account for the complexity of therapeutic regimen at the patient level.  
14  
15  
16

17  
18  
19 To take advantage of the fact that the RER database includes multiple years of data, we created  
20  
21 history variables using the utilization for each year of data available. Since we were working  
22  
23 with the 2011 data to predict hospitalization or death in 2012, we created history variables based  
24  
25 on 2004-2010 data. This set included 83 of the diagnostic category/stage variables as well as 11  
26  
27 variables based on pharmacy utilization such as exposure to polypharmacy and use of  
28  
29 cardiovascular drugs. If the individual had a history of a disease in any of the years from 2004 to  
30  
31 2010 they were flagged as having a history of that disease and this was used as a potential  
32  
33 predictor variable.  
34  
35  
36  
37  
38  
39  
40

### 41 Modeling

42  
43  
44 Logistic regression models were used to estimate predicted probabilities for the occurrence of an  
45  
46 inpatient hospital stay for the selected conditions or death for individual patients. Risk of  
47  
48 hospitalization or death, and the variables that relate to those risks are highly dependent on age  
49  
50 and gender. Regression models were fit in each of 14 gender and age strata using SAS Version  
51  
52 9.2 (SAS Institute, Cary NC). A stepwise process with relaxed entry and retention criteria  
53  
54  
55  
56  
57  
58  
59  
60

1  
2  
3 (inclusion p-value  $\leq 0.8$ , retention  $\leq 0.5$ ) was used for selecting a reduced, but robust set of  
4  
5 independent variables for the model in each age/gender stratum.  
6  
7  
8  
9

### 10 11 12 Evaluation of the Models 13

14  
15 The predictive accuracy of the modelling was evaluated using C-statistics (the area under the  
16  
17 receiver operating characteristics curve), along with three measures traditionally used with  
18  
19 clinical screening tools: sensitivity, specificity and positive predictive value.  
20  
21

22  
23 C-statistics were used to evaluate the models in two ways. The first evaluation consisted of  
24  
25 fitting the model developed using utilization and demographic data from 2011, along with  
26  
27 historical variables based on 2004-2010 data, and outcomes (hospitalization or death) from 2012  
28  
29 and then computing a C-statistic to evaluate how the models performed at predicting those  
30  
31 outcomes on which the models were conditioned. However, this evaluation is not consistent with  
32  
33 evaluating how the data are used in practice. In practice, we have current predictor information,  
34  
35 but the outcomes have not been realized. To better estimate how the models are likely to perform  
36  
37 in this setting, we fit models to outcomes data up to a year prior to the most current available  
38  
39 (e.g., 2011 outcomes modelled with predictors from 2010, along with historical variables based  
40  
41 on 2004-2009 data). We then computed a C-statistic for projections made on the risk of  
42  
43 hospitalization or death outcomes (in 2012) using the next year's predictor information (in 2011).  
44  
45 This way, the models are forced to make projections into the future, but we have the actual  
46  
47 observed outcomes data to evaluate the modelling process as it would be used in practice. The  
48  
49 resulting C-statistics obtained from these two model runs were compared.  
50  
51  
52  
53  
54  
55  
56  
57  
58  
59  
60

1  
2  
3 In order to evaluate the performance of the model across different risk thresholds we classified  
4 predicted risk scores. “Very high risk” was defined as patients with a predicted risk of  
5 hospitalization or death in the following year of  $\geq 25\%$  while “high risk” was defined as patients  
6 with a predicted risk of hospitalization of 15-24%. These risk thresholds were selected after  
7 consultation with physicians practicing in the medical homes to yield a total of about 10% of the  
8 1,500 patients enrolled with a typical primary care physician.  
9  
10  
11  
12  
13  
14  
15  
16

### 17 **Results**

18  
19  
20 Among the 3,726,380 adult residents of Emilia Romagna at the end of 2011, 449,163 (12.1%)  
21 were hospitalized in 2012; 4.2% were hospitalized for the selected conditions defined earlier or  
22 died in 2012 (3.6% hospitalized, 1.3% died).  
23  
24  
25  
26  
27  
28

29 Table 1 shows the distribution of the demographics (age and gender), number of chronic  
30 conditions, body systems impacted by the selected chronic conditions, polypharmacy and  
31 inappropriate prescribing among the eligible RER residents, as of December 31, 2011. The  
32 table also compares these characteristics of the total adult population of the region to the  
33 subgroups of the population classified in the “very high risk” and “high risk” categories. Based  
34 on the model results, 114,255 individuals were identified as having a predicted risk of  
35 hospitalization or death in 2012 of  $\geq 25\%$  and classified as “very high risk.” An additional  
36 134,610 individuals had a predicted risk of hospitalization or death in 2012 of 15-24% and were  
37 classified as “high risk.”  
38  
39  
40  
41  
42  
43  
44  
45  
46  
47  
48  
49  
50  
51  
52  
53  
54

55 **Table 1. Demographic and clinical characteristics of the Regione Emilia-Romagna population, overall**  
56 **and by risk category**

|                                         | Total population* |              | Very High Risk** |              | High risk**   |              |
|-----------------------------------------|-------------------|--------------|------------------|--------------|---------------|--------------|
|                                         | 3,726,380         |              | 114,255          |              | 134,610       |              |
| <b>Gender</b>                           | N.                | %            | N.               | %            | N.            | %            |
| Male                                    | 1,788,048         | 48.0%        | 54,357           | 47.6%        | 61,803        | 45.9%        |
| Female                                  | 1,938,332         | 52.0%        | 59,898           | 52.4%        | 72,807        | 54.1%        |
| <b>Age groups</b>                       |                   |              |                  |              |               |              |
| 18-24                                   | 258,338           | 6.9%         | 76               | 0.1%         | 105           | 0.1%         |
| 25-34                                   | 499,786           | 13.4%        | 302              | 0.3%         | 391           | 0.3%         |
| 35-44                                   | 732,626           | 19.7%        | 1,137            | 1.0%         | 1,198         | 0.9%         |
| 45-54                                   | 676,047           | 18.1%        | 2,612            | 2.3%         | 2,485         | 1.8%         |
| 55-64                                   | 550,689           | 14.8%        | 5,391            | 4.7%         | 5,287         | 3.9%         |
| 65-74                                   | 482,346           | 12.9%        | 13,154           | 11.5%        | 14,471        | 10.8%        |
| 74-85                                   | 364,369           | 9.8%         | 33,430           | 29.3%        | 44,857        | 33.3%        |
| 85+                                     | 162,179           | 4.4%         | 58,153           | 50.9%        | 65,816        | 48.9%        |
| <b>Number of Chronic Conditions</b>     |                   |              |                  |              |               |              |
| 0-1                                     | 2,775,888         | 74.5%        | 8,176            | 7.2%         | 24,618        | 18.3%        |
| 2 or more                               | 950,492           | 25.5%        | 106,079          | 92.8%        | 109,992       | 81.7%        |
| 5 or more                               | 99,337            | 2.7%         | 45,445           | 39.8%        | 20,576        | 15.3%        |
| <b>Selected Conditions/Body Systems</b> |                   |              |                  |              |               |              |
| Cancer                                  | 99,328            | 2.7%         | 23,872           | 20.9%        | 14,305        | 10.6%        |
| Cardiovascular                          | 967,796           | 26.0%        | 96,157           | 84.2%        | 103,749       | 77.1%        |
| Male Genitourinary <sup>#</sup>         | 130,609           | 7.3%         | 14,616           | 26.9%        | 16,776        | 27.1%        |
| Ear, Nose, Throat                       | 5,364             | 0.1%         | 240              | 0.2%         | 242           | 0.2%         |
| Endocrine                               | 429,528           | 11.5%        | 40,653           | 35.6%        | 37,471        | 27.8%        |
| Eye                                     | 114,117           | 3.1%         | 9,558            | 8.4%         | 13,478        | 10.0%        |
| Gastrointestinal                        | 580,946           | 15.6%        | 74,718           | 65.4%        | 66,305        | 49.3%        |
| Gynecologic <sup>##</sup>               | 21,806            | 1.1%         | 333              | 0.6%         | 405           | 0.6%         |
| Hematologic                             | 45,022            | 1.2%         | 15,353           | 13.4%        | 6,591         | 4.9%         |
| Hepatobiliary                           | 24,785            | 0.7%         | 6,477            | 5.7%         | 3,306         | 2.5%         |
| Immunologic                             | 3,281             | 0.1%         | 464              | 0.4%         | 273           | 0.2%         |
| Infectious Disease                      | 4,723             | 0.1%         | 2,207            | 1.9%         | 727           | 0.5%         |
| Musculoskeletal                         | 419,184           | 11.2%        | 43,436           | 38.0%        | 41,000        | 30.5%        |
| Neurologic                              | 173,751           | 4.7%         | 34,494           | 30.2%        | 24,838        | 18.5%        |
| Psychological                           | 291,308           | 7.8%         | 43,387           | 38.0%        | 33,715        | 25.0%        |
| Respiratory                             | 176,830           | 4.7%         | 39,082           | 34.2%        | 21,763        | 16.2%        |
| Skin                                    | 28,339            | 0.8%         | 7,645            | 6.7%         | 3,008         | 2.2%         |
| Urogenital                              | 37,728            | 1.0%         | 16,501           | 14.4%        | 5,740         | 4.3%         |
| <b>Polypharmacy<sup>^</sup></b>         | <b>609,278</b>    | <b>16.4%</b> | <b>92,153</b>    | <b>80.7%</b> | <b>92,156</b> | <b>68.5%</b> |

|                                                                                       |         |       |        |       |        |       |
|---------------------------------------------------------------------------------------|---------|-------|--------|-------|--------|-------|
| <b>Any potentially inappropriate medications (age 65 years or older)<sup>^^</sup></b> | 257,033 | 25.5% | 51,055 | 48.7% | 49,003 | 39.2% |
|---------------------------------------------------------------------------------------|---------|-------|--------|-------|--------|-------|

\* Adults (age 18 or older) and alive at 31 December 2011.

\*\* "Very high risk" was defined as patients with a predicted risk of hospitalization or death in the following year of > 25% while "high risk" was defined as patients with a predicted risk of hospitalization of 15-24%.

# Men only.

## Women only.

^ Polypharmacy is defined as the simultaneous use of five or more active ingredients for at least 15 consecutive days.

^^ The list of potentially inappropriate medications can be found in: Maio V, Del Canale S, Abouzaid S. Using Explicit Criteria to Evaluate the Quality of Prescribing in Elderly Italian Outpatients: A Cohort Study. *Journal of Clinical Pharmacy and Therapeutics* 2010;35:219-229.

There was little difference across the risk categories by gender. Age distributions for the "very high risk" and "high risk" groups were shifted more towards the older age groups than those in the overall study population. Residents age 85 or older represented about 4.5% of the RER population, but about 50% of the "very high" and "high" predicted risk groups. More than 75% of the residents over age 85 were classified as "very high" or "high" risk. However, age alone was not sufficient to their predict risk. For example, residents between 75 and 84 years of age made up 23% of the "very high" risk group and 41% of the "high" risk group, but over 85% of the residents in this age category had neither "very high" nor "high" predicted risk.

Across age and gender strata, demographics and health care utilization experience in 2011 were the most commonly used independent variables for predicting hospitalization or death in 2012. Selected history variables flagging chronic problems such as cardiovascular disease, diabetes mellitus and chronic renal failure and a history of prescriptions for cardiovascular medications and polypharmacy were also significant predictors.

1  
2  
3 The residents in the two higher risk groups were more likely than others to have multiple chronic  
4 diseases and to experience polypharmacy and inappropriate medication use. The residents  
5 identified as “very high risk” or “high risk” by the model also showed a number of striking  
6 differences from others in terms of the occurrence of some of the most prevalent health  
7 conditions by type and body system. Although cardiovascular conditions were not uncommon in  
8 the total adult population (26.0%), they were far more common among those classified as “very  
9 high risk” and “high risk” (84.2% and 77.1%, respectively). Similarly, gastrointestinal conditions  
10 affected 15.6% of the total population, but were diagnosed in 65.4% of the “very high risk” and  
11 49.3% of the “high risk” patients. Cancer occurred in 2.7% of the total population, but 20.9% of  
12 the “very high risk” and 10.6% of the “high risk” patients had a cancer diagnosis. Mental health  
13 problems were identified in 7.8% of the adult population, but in 34.2% of the “very high risk”  
14 and 25.0% of the “high risk” patients.

15  
16  
17  
18  
19  
20  
21  
22  
23  
24  
25  
26  
27  
28  
29  
30  
31  
32 The C-statistic for the model of 2012 outcomes developed using 2011 predictors and the  
33 C-statistic based on the parameters from the model of 2011 outcomes regressed on 2010  
34 predictors applied to the 2011 predictors and 2012 outcomes, were very similar (0.856 and 0.853,  
35 respectively). These results suggest that the relationship between predictors and risk of  
36 hospitalization changed little in one year and that model parameters developed in a prior year can  
37 be used reliably with the most current year’s data to predict unknown outcomes in the next year  
38 with only a minimal loss in performance in this population.

39  
40  
41  
42  
43  
44  
45  
46  
47  
48  
49  
50 Table 2 shows the sensitivity, specificity, positive predictive value and number of true positives  
51 for the model at the two selected cut-off points. The sensitivity (percentage of patients actually  
52 hospitalized who had been identified by the model as having a predicted risk higher than the cut-  
53  
54  
55  
56

off point) was 29.8% for those with the “very high” risk scores. This percentage represents 46,950 of the 157,550 residents of the region who were hospitalized for a selected condition or died in 2012. If we modify the risk score threshold to include individuals with a predicted risk of hospitalization for selected conditions or death of  $\geq 15\%$  (i.e., both the “very high risk” and the “high risk” patients) the sensitivity is .471. The true negative rate (specificity) is very high for both risk thresholds (.981 and .951, respectively).

| Measure                                       | Cut-off points for comparison |                                   |
|-----------------------------------------------|-------------------------------|-----------------------------------|
|                                               | "Very high risk"*             | "Very high risk"* + "High risk"** |
| <b>Sensitivity</b> <sup>3</sup>               | 0.298                         | 0.471                             |
| <b>Specificity</b> <sup>4</sup>               | 0.981                         | 0.951                             |
| <b>Positive Predictive Value</b> <sup>5</sup> | 0.411                         | 0.298                             |
| <b>True positives</b> <sup>6</sup>            | 46,950                        | 74,196                            |

\* "Very high risk" is defined as patients with a predicted risk of hospitalization of  $\geq 25\%$ .  
 \*\* "Very high risk" + "High risk", is defined as patients with a predicted risk of hospitalization of  $\geq 15\%$ .  
 # Sensitivity is defined as the proportion of those hospitalized who were predicted to be hospitalized (true positive rate).  
 ## Specificity is the proportion of those not hospitalized who were not predicted to be hospitalized (true negative rate).  
 ^ Positive Predictive Value is the proportion of those predicted to be hospitalized who were actually hospitalized.  
 ^^ True positives are the number of residents who were predicted to be at risk for hospitalization at the predicted risk threshold and were actually hospitalized.

The model appears to be well calibrated across levels of risk. The Figure depicts the RER population divided into groups by deciles of predicted risk of hospitalization or death from the models. The observed prevalence of hospitalization or death is compared to the average predicted risk among individuals in each of the ten predicted risk groups. For example, the



overall rate of hospitalization for the selected conditions or death in 2012 was 4.2%. For those patients in the highest predicted risk decile group, the average predicted risk was 23.9% and the actual prevalence of hospitalization or death was 24.2%.

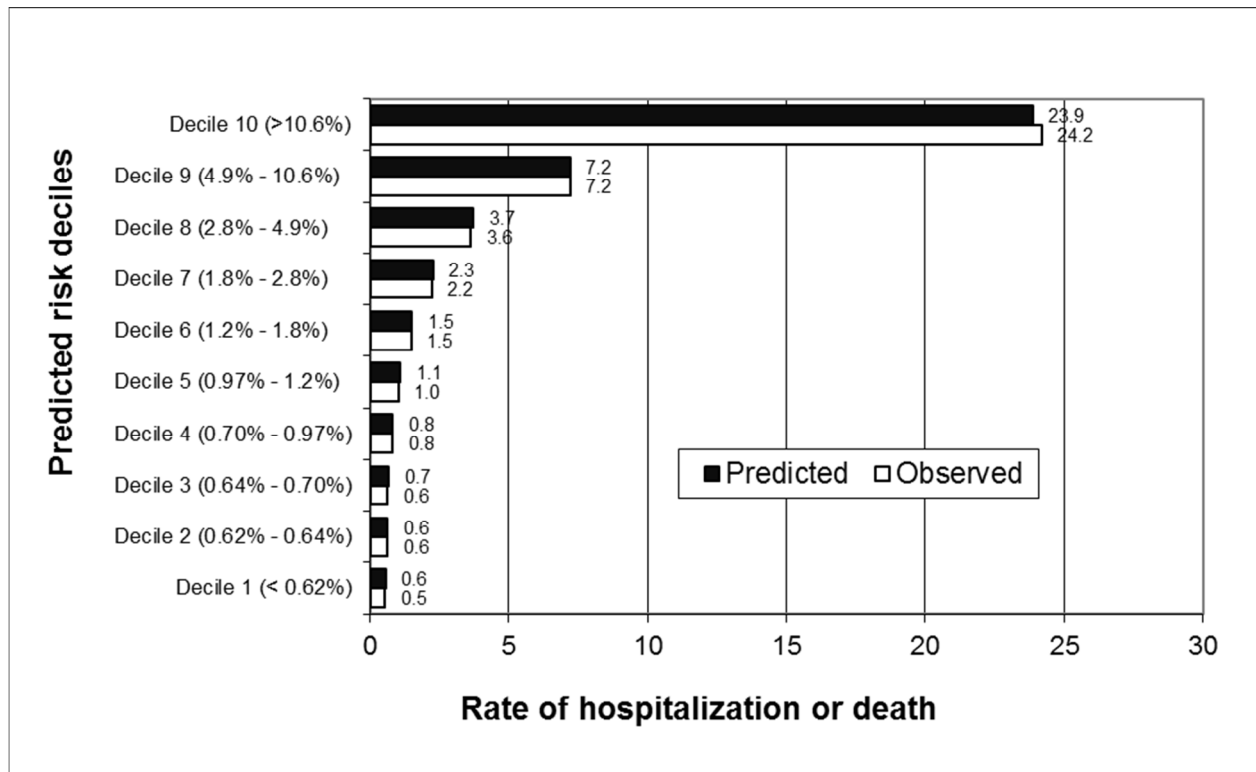

Figure. Model calibration: Predicted risk and observed prevalence of hospitalization or death in 2012 by predicted risk decile groups.

## Discussion

We have developed a population-based model that identifies the risk of hospitalization for all adult RER residents and does so with a level of performance ( $c=0.85$ ) as high as, or higher than, similar models. In addition, we believe that the definition of the dependent variable chosen for our models increases the probability that they are identifying patients who risk can potentially be improved by appropriate care. A systematic review by Kansagara<sup>13</sup> of models designed to

1  
2  
3 predict readmissions, showed C-statistic results in the range of 0.55 to 0.83. Recent work by  
4  
5 Billings et al<sup>14</sup> to develop models predictive of emergent admissions in the UK had results  
6  
7 ranging from 0.73 to 0.78. Li Wang, et al. (2013),<sup>15</sup> using information available through the US  
8  
9 Veteran's Administration that also included lab data, demonstrated c-statistics of 0.81 and 0.79,  
10  
11 respectively, for their models of 90-day or 12-month hospitalization or death outcomes.  
12  
13

14  
15  
16 Although previous studies have developed models predictive of hospital care, these models fall  
17  
18 short of the needs of the Patient Centered Medical Homes being implemented in RER. Typically,  
19  
20 these models have focused on specific age groups,<sup>16</sup> conditions, or types of admissions, such as  
21  
22 emergent<sup>14</sup> or unplanned admissions or rehospitalizations, or health insurance plans in the United  
23  
24 States, including private insurance plans, Medicare and Medicaid plans.<sup>17,18</sup> The models we have  
25  
26 developed are applied to the entire adult population of RER. They use existing administrative  
27  
28 data, which makes them cost effective to apply.  
29  
30  
31

32  
33 Patient Centered Medical Homes, including those instituted in RER, are responsible for  
34  
35 addressing the needs of their population and making the best use of their finite resources to  
36  
37 accomplish this. Preventing unnecessary admissions could improve both the quality of care and  
38  
39 health status of the enrolled population, and result in a substantial savings. To accomplish this,  
40  
41 predictive models and risk stratification tools such as those developed for this project are needed  
42  
43 to identify patients at risk of preventable admissions and provide information that can be used by  
44  
45 the medical homes to help manage care.  
46  
47  
48

49  
50 There are some limitations to the model. The model is developed from administrative data.

51  
52 Administrative data are collected for reimbursement and tracking utilization and not for medical  
53  
54 research. They lack the clinical specificity that would be desirable in assessing an individual's  
55  
56

1  
2  
3 medical problems. While the hospital discharge abstract data do include diagnostic information  
4 coded using ICD-9-CM, no similar data are available for outpatient encounters in the RER  
5  
6  
7  
8 database. In addition, our models use prior utilization among the predictor variables. With the  
9  
10 administrative data we cannot distinguish between appropriate and inappropriate treatment which  
11  
12 may bias our results.  
13

14  
15  
16 Despite the limitations of administrative data, they have many advantages for this project: they  
17  
18 are readily available, relatively inexpensive to analyze and cover large populations over many  
19  
20 years. They are ideal for uncovering patterns of care. If information from the medical records is  
21  
22 needed, the results of these analyses can then be supplemented by focused clinical reviews at the  
23  
24 local level. Also, The RER has a system in place to monitor the quality of diagnosis and  
25  
26 procedure coding in their hospital discharge abstract data. Controls at both the hospital and  
27  
28 regional level assess the validity of coding and the consistency of codes assigned such as  
29  
30 congruity between sex, age and diagnosis and between diagnosis and procedure. The existence  
31  
32 of the RER administrative database made it feasible to develop the models described in this  
33  
34 article at relatively low cost and to update the models over time without additional data  
35  
36 collection that others have found necessary.<sup>14</sup>  
37  
38  
39  
40  
41  
42

43 Currently, these risk scores are being integrated with other information in profiles of high-risk  
44  
45 patients furnished to providers in 12 newly formed medical homes, including 83 primary care  
46  
47 physicians serving a total of about 100,000 patients, in the Parma Local Health Authority located  
48  
49 in RER. Along with the risk scores, this information includes data about previous  
50  
51 hospitalizations, use of referrals, medications, long-term care and home care services, and a  
52  
53 number of process-like quality indicators for diabetic and cardiovascular patients, and for  
54  
55  
56  
57  
58  
59  
60

1  
2  
3 appropriate medication use in older patients. An evaluation of the use and usefulness of these  
4  
5 profiles is under way.  
6  
7

8  
9 In summary, these models provide a means of identifying patients at high risk for hospitalization.  
10  
11 The risk predictions, in conjunction with the risk profile, show promise as a useful organizational  
12  
13 tool for the regional Patient Centered Medical Homes to develop and implement proactive case  
14  
15 management and disease management programs. The RER is reviewing the results of the Parma  
16  
17 Local Health Authority pilot project of the profiles. Once their usefulness has been further  
18  
19 evaluated, their use will be expanded to other Medical Homes in development in the other Local  
20  
21 Health Authorities in the Emilia-Romagna region. If similar data are available, these models can  
22  
23 be applied in other Italian regions and other countries investing in organization similar to the  
24  
25 Patient Centered Medical Home.  
26  
27  
28  
29  
30  
31  
32  
33  
34  
35  
36  
37  
38  
39  
40  
41  
42  
43  
44  
45  
46  
47  
48  
49  
50  
51  
52  
53  
54  
55  
56  
57  
58  
59  
60

1  
2  
3  
4  
5  
6  
7  
8  
9  
10  
11  
12  
13  
14  
15  
16  
17  
18  
19  
20  
21  
22  
23  
24  
25  
26  
27  
28  
29  
30  
31  
32  
33  
34  
35  
36  
37  
38  
39  
40  
41  
42  
43  
44  
45  
46  
47  
48  
49  
50  
51  
52  
53  
54  
55  
56  
57  
58  
59  
60

**Ethical approval:** This study was approved by the Institutional Review Board of Thomas Jefferson University as an expedited retrospective database/record review. The IRB granted a waiver of informed consent.

**Contributorship Statement:** DZL, RG, VM, and JSG were responsible for the conceptualization of this project. MR, JM, and ML were responsible for creation of the data sets used in this project. DZL, VM, MR, and JSG were responsible for the definition of analytical variables. SWK, MR, ML and JM were responsible for modeling and statistical analysis. DZL managed the research team. RG and JSG advised on the analyses and results. All authors contributed to the preparation of the manuscript.

**Competing interests:** All authors have completed the Unified Competing Interest form and declare grants from the Regione Emilia-Romagna (Louis, Robeson, McAna, Maio, Keith, Liu, Gonnella) during the conduct of the study. Louis and Gonnella declare personal fees from Truven Health Analytics, The National School of Public Health, Portugal, INSIEL Mercato.

**Data Sharing Statement:** No additional data

1  
2  
3  
4  
5 1 Saltman RB, Rico A, Boerma W, eds. Primary care in the driver's seat? Organizational reform  
6  
7 in European primary care. New York, New York: World Health Organization European  
8  
9 Observatory on Health Systems and Policies Series 2006.

10  
11  
12 2 Smith J, Goodwin N. Towards managed primary care: The role and experience of primary care  
13  
14 organizations. Burlington, VT: Ashgate Publishing Company 2006.

15  
16  
17 3 Defining the PCMH. Agency for Healthcare Research and Quality Web site.  
18  
19 [http://www.pcmh.ahrq.gov/portal/server.pt/community/pcmh\\_\\_home/1483/pcmh\\_defining\\_the\\_](http://www.pcmh.ahrq.gov/portal/server.pt/community/pcmh__home/1483/pcmh_defining_the_)  
20  
21 [pcmh\\_\\_home/1483/pcmh\\_defining\\_the\\_](http://www.pcmh.ahrq.gov/portal/server.pt/community/pcmh__home/1483/pcmh_defining_the_)  
22  
23 [pcmh\\_v2](http://www.pcmh.ahrq.gov/portal/server.pt/community/pcmh__home/1483/pcmh_defining_the_) (accessed June 30, 2013).

24  
25  
26 4 Lo Scalzo A, Donatini A, Orzella I, et al. Italy: Health system review. *Health Syst Transit*.  
27  
28 2009;**11**(6):1-216.

29  
30  
31 5 Knutson D, Bella M, Llanos K. Predictive Modeling: A Guide for State Medicaid Purchasers.  
32  
33 Center for Health Care Strategies, Inc. 2009.

34  
35  
36  
37 6 The Emilia-Romagna Regional Health Service and the new welfare system: Facilities,  
38  
39 expenditure, and activities as of 31.12.2010. Programs, agreements and organisational models.  
40  
41 Regione Emilia-Romagna Assessorato Politiche per la Salute. Bologna, Italy 2012.

42  
43  
44  
45 7 Gonnella JS, Hornbrook MC, Louis DZ. Staging of Disease: A Case-Mix Measurement. *JAMA*  
46  
47 1984;**251**:637-44.

48  
49  
50 8 Gonnella JS, Louis DZ, Gozum ME, et al, eds. Clinical Criteria for Disease Staging. 6th  
51  
52 edition. Ann Arbor, MI: Truven Health Analytics 2012.

1  
2  
3  
4  
5 9 Louis DZ, F Taroni, R Melotti, et al. Increasing appropriateness of hospital admissions in the  
6  
7 Emilia-Romagna region of Italy. *J Health Serv Res Policy* 2008;**13**(4):202-8.

8  
9  
10 10 Slabaugh L, Maio V, Templin M, et al. Prevalence and risk of polypharmacy amongst elderly  
11  
12 primary care patients in Regione Emilia-Romagna, Italy. *Drug Aging* 2010;**27**:1019-28.

13  
14  
15 11 Gagne JJ, Maio V, Rabinowitz C. Prevalence and Predictors of Potential Drug-Drug  
16  
17 Interactions among Ambulatory Patients in Regione Emilia-Romagna, Italy. *J Clin Pharm Ther*  
18  
19 2008;**33**:141-51.

20  
21  
22 12 Maio V, Del Canale S, Abouzaid S. Using Explicit Criteria to Evaluate the Quality of  
23  
24 Prescribing in Elderly Italian Outpatients: A Cohort Study. *J Clin Pharm Ther* 2010;**35**:219-29.

25  
26  
27 13 Kansagara D, Englander H, Salanitro A, et al. Risk prediction models for hospital  
28  
29 readmission: A systematic review. Washington, DC: Department of Veterans Affairs US 2011.

30  
31  
32 14 Billings J, Georghiou T, Blunt I, et al. Choosing a model to predict hospital admission: An  
33  
34 observational study of new variants of predictive models for case finding. *BMJ Open*  
35  
36 2013;**3**(8):e003352. doi: 10.1136/bmjopen-2013-003352 [published Online First: 26 August  
37  
38 2013].

39  
40  
41 15 Wang L, Porter B, Maynard C, et al. Predicting risk of hospitalization or death among patients  
42  
43 receiving primary care in the Veterans Health Administration. *Med Care* 2013;**51**(4):368-73.

44  
45  
46 16 Inouye SK, Zhang Y, Jones RN, et al. Risk factors for hospitalization among community-  
47  
48 dwelling primary care older patients: development and validation of a predictive model. *Med*  
49  
50 *Care* 2008;**46**(7):726-31.

1  
2  
3  
4  
5 17 Lemke KW, Weiner JP, Clark JM. Development and validation of a model for predicting  
6  
7 inpatient hospitalization. *Med Care* 2012;**50**(2):131-9.  
8  
9

10 18 McAna JF, Crawford AG, Novinger BW, et al. A predictive model of hospitalization risk  
11  
12 among disabled Medicaid enrollees. *Am J Manag Care* 2013;**19**(5):166-74.  
13  
14  
15  
16  
17  
18  
19  
20  
21  
22  
23  
24  
25  
26  
27  
28  
29  
30  
31  
32  
33  
34  
35  
36  
37  
38  
39  
40  
41  
42  
43  
44  
45  
46  
47  
48  
49  
50  
51  
52  
53  
54  
55  
56  
57  
58  
59  
60

For peer review only



Appendix to: **Predicting Risk of Hospitalization Using a Population Based Longitudinal Database**

| Body System or Etiology Group | Hospital Discharge data                                                                                                                                                                                                                                                                                                                                                                                                                                                                                                                                                                                                                                                                                                                                                                                                                                                                                                                                                                                                                                                                                                                                                                                                                                                                                                                       | Outpatient pharmacy data            | Home health care                                                                                                                                           | Specialty visits                                                                                                          |
|-------------------------------|-----------------------------------------------------------------------------------------------------------------------------------------------------------------------------------------------------------------------------------------------------------------------------------------------------------------------------------------------------------------------------------------------------------------------------------------------------------------------------------------------------------------------------------------------------------------------------------------------------------------------------------------------------------------------------------------------------------------------------------------------------------------------------------------------------------------------------------------------------------------------------------------------------------------------------------------------------------------------------------------------------------------------------------------------------------------------------------------------------------------------------------------------------------------------------------------------------------------------------------------------------------------------------------------------------------------------------------------------|-------------------------------------|------------------------------------------------------------------------------------------------------------------------------------------------------------|---------------------------------------------------------------------------------------------------------------------------|
| <b>Cancer</b>                 | Neoplasm, Malignant:<br>Cardiovascular, Hypopharynx, Oral Cavity, Oropharynx, Salivary Glands and Mandible, Other Endocrine System, Larynx, Glottis, Larynx, Subglottic, Larynx, Supraglottic, Nasopharyngeal, Sinuses, Ocular Melanoma, Other Eye and Periocular, Colon and Rectum, Esophagus, Small Bowel, Stomach, Other Gastrointestinal System, Bladder, Urinary, Kidneys, Other Genitourinary System, Breast (Female), Cervix Uteri, Endometrium, Ovaries, Vagina, Vulva, Other Female Genitalia, Hodgkin's Lymphoma, Multiple Myeloma, Mastocytosis, Pancreas, Other Hepatobiliary Tract, Breast (Male), Penile, Prostate, Testicular, Primary Bone, Waldenstrom's Macroglobulinemia, Nonspecific Sites, Unspecified Primary Site, Lungs, Bronchi, or Mediastinum, Hodgkin's Disease Lymphocytic Depletion, Hodgkin's Disease Lymphocytic Predominance, Hodgkin's Disease Mixed Cellularity, Hodgkin's Disease Nodular Sclerosis, Lymphatic and Hematopoietic (Other Types), Lymphoma, Cutaneous T Cell (Mycosis Fungoides), Lymphoma (Diffuse Mixed Small and Large Cell), Lymphoma (Diffuse Large Cell), Lymphoma (Follicular Predominantly Large Cell), Lymphoma (Histiocytic Cell), Lymphoma (Lymphoblastic), Other Respiratory System, Carcinoma (Basal Cell stage 2/3), Carcinoma (Squamous Cell), Melanoma, Other Skin and Soft | Antineoplastics<br>5HT3 Antagonists | 2005-2009: Visits prescribed due to the presence of cancer. Beginning in 2010, the following ICD-9-CM codes were in the record: 140-208, 235-239, V10, V16 | Visits prescribed for radiation therapy, or for Injection or infusion of chemotherapeutic Substances for cancer treatment |

A-1

| Body System or Etiology Group | Hospital Discharge data                                                                                                                                                                                                                                                                                                                                                                                                                                                                                                                                                                                                                                                                                                                                                                                                                                                          | Outpatient pharmacy data                                                                                                                                                                        | Home health care                                                                                                                                                                                                                                                                             | Specialty visits |
|-------------------------------|----------------------------------------------------------------------------------------------------------------------------------------------------------------------------------------------------------------------------------------------------------------------------------------------------------------------------------------------------------------------------------------------------------------------------------------------------------------------------------------------------------------------------------------------------------------------------------------------------------------------------------------------------------------------------------------------------------------------------------------------------------------------------------------------------------------------------------------------------------------------------------|-------------------------------------------------------------------------------------------------------------------------------------------------------------------------------------------------|----------------------------------------------------------------------------------------------------------------------------------------------------------------------------------------------------------------------------------------------------------------------------------------------|------------------|
|                               | Tissue<br>Neoplasm:<br>Pheochromocytoma, Eyelid, Central Nervous System,<br>Lymphatic or Hematopoietic<br>Leukemia:<br>Acute Lymphocytic, Acute Nonlymphocytic, Chronic<br>Lymphocytic, Chronic Myelogenous, Other Types<br>Encounter for: Chemotherapy, Radiation Therapy<br>ICD-9-CM Procedure codes: 99.25, 99.28, 00.10,00.15,92.2x                                                                                                                                                                                                                                                                                                                                                                                                                                                                                                                                          |                                                                                                                                                                                                 |                                                                                                                                                                                                                                                                                              |                  |
| <b>Cardiovascular</b>         | Aneurysm: Abdominal, Thoracic<br>Anomaly: Patent Ductus Arteriosus, Atrial Septal Defect,<br>Atrioventricular Defects, Coarctation of the Aorta, Other<br>Congenital Heart Disease, Pulmonary Valve Stenosis,<br>Tetralogy of Fallot (stage 3), Transposition of the Great<br>Arteries, Ventricular Septal Defects, Other Circulatory<br>System<br>Aortic: Regurgitation, Stenosis<br>Mitral: Regurgitation, Stenosis<br>Neoplasm: Benign of the Cardiovascular System<br>Arrhythmias, Cardiomyopathies, Conduction Disorders,<br>Congestive Heart Failure, Coronary Artery Disease Prior<br>Coronary Revascularization, Coronary Artery Disease w/o<br>Prior, Coronary Revascularization, Essential Hypertension,<br>Infective, Endocarditis, Pericarditis: Chronic (stage 2/3),<br>Viral or Traumatic (stage 2/3)<br>Periarteritis Nodosa, Raynaud's Disease, Thromboangiitis, | Oral anti-coagulants<br>beta-blockers<br>ACE/ARB<br>anti-platelets<br>calcium channel blockers<br>anti-arrhythmics<br>digitalis glycosides<br>nitrates<br>diuretics<br>alfa-blockers<br>statins | 2005-2009: Visits<br>prescribed due to<br>the presence of<br>Congestive Heart<br>Failure or not-well<br>defined<br>cardiopathy, and<br>other diseases of<br>cardiovascular<br>system.<br>Beginning in 2010,<br>the following ICD-<br>9-CM-CM codes<br>were in the record:<br>390-454,456-459 |                  |

| Body System or Etiology Group | Hospital Discharge data                                                                                                                                                                                                                                                                                                                                                                                                                                                                                                                                                                                                                                             | Outpatient pharmacy data                                                                            | Home health care                                                                                                                                     | Specialty visits |
|-------------------------------|---------------------------------------------------------------------------------------------------------------------------------------------------------------------------------------------------------------------------------------------------------------------------------------------------------------------------------------------------------------------------------------------------------------------------------------------------------------------------------------------------------------------------------------------------------------------------------------------------------------------------------------------------------------------|-----------------------------------------------------------------------------------------------------|------------------------------------------------------------------------------------------------------------------------------------------------------|------------------|
|                               | Obliterans, Thrombophlebitis, Tibial, Iliac, Femoral, or Popliteal Artery Disease, Varicose Veins of Lower Extremities, Secondary Hypertension, Budd Chiari Syndrome, Rheumatic Fever (stage 2/3)<br>Vasculitis<br>Other: Atherosclerosis, Cardiac Conditions, Cardiovascular Symptoms, Circulatory Disorders, Diseases of Arteries, Diseases of Veins, Disorders of Pulmonary Circulation, Lymphatic Disorders                                                                                                                                                                                                                                                     |                                                                                                     |                                                                                                                                                      |                  |
| <b>Endocrine</b>              | Adrenal Insufficiency, Cushing's Syndrome, Diabetes insipidus,<br>Diabetes Mellitus Type 1, Diabetes Mellitus Type 2 and Hyperglycemic States, Hyperthyroidism, Hypoglycemia, Hypothyroidism, Monotropic Hormone Deficiency, Primary Amyloidosis, Thyroiditis, Klinefelter's Syndrome, Turner's or Noonan's Syndrome, Obesity<br>Goiter: Nontoxic or Euthyroid (stage 2/3)<br>Neoplasm, Benign: Acromegaly, Adenoma, Parathyroid, Hyperparathyroidism, Primary Hyperaldosteronism, Other Endocrine System<br>Neoplasm, Malignant: Thyroid<br>Other: Endocrine Disorders, Electrolyte Disorders, Nutritional and Metabolic Disorders<br>Anomaly: Adrenal Hyperplasia | Insulins<br>biguanides<br>sulfonylureas<br>vasopressin<br>thyroid replacement<br>antithyroid agents | 2005-2009: Visits prescribed due to the presence of diabetes mellitus<br>Beginning in 2010, the following ICD-9-CM codes were in the record: 240-278 |                  |

| Body System or Etiology Group | Hospital Discharge data                                                                                                                                                                                                                                                                                                                                                                                                                                                                                                                                                                                                                                        | Outpatient pharmacy data                                                                                   | Home health care                                                                                    | Specialty visits |
|-------------------------------|----------------------------------------------------------------------------------------------------------------------------------------------------------------------------------------------------------------------------------------------------------------------------------------------------------------------------------------------------------------------------------------------------------------------------------------------------------------------------------------------------------------------------------------------------------------------------------------------------------------------------------------------------------------|------------------------------------------------------------------------------------------------------------|-----------------------------------------------------------------------------------------------------|------------------|
| <b>Ear, Nose, Throat</b>      | Diseases of Salivary Gland, Incl. Parotitis or Benign Tumors, Other Disorders of Oral Cavity (stage 2), Cholesteatoma, Meniere's Disease, Otitis Media, Sinusitis<br>Hearing Loss due to: Acoustic Trauma, Otosclerosis<br>Neoplasm, Benign: Larynx, Sinuses, Oral Cavity and Pharyngeal Structures<br>Pharyngitis: Non-Streptococcal (stage 2)                                                                                                                                                                                                                                                                                                                |                                                                                                            |                                                                                                     |                  |
| <b>Eye</b>                    | Cataract, Conjunctivitis: Bacterial, Contusion or Ruptured Globe, Dacryostenosis or Dacryocystitis, Detachment of the Retina, Ectropion or Entropion (Abnormal Lower Lid Position), Endophthalmitis, Foreign Body: Orbit, Fracture: Orbit, Blow-Out, Fungal Infection of the Eye, Glaucoma, Hypovitaminosis A, Laceration: Cornea, Macular Degeneration, Orbital Infection, Prematurity: Retinopathy, Ptosis of Upper Lid, Retrobulbar Orbital Hemorrhage, Trachoma, Other Eye Disorders<br>Injury or Laceration: Eyelid, Periocular, Cornea, Conjunctiv<br>Injury: Eyes, Nonionizing Radiation<br>Keratitis: Acanthamoeba, Bacterial<br>Neoplasm, Benign: Eye | Sympaticomimetic agents<br>parasympaticomimetic agents<br>anhydrase inhibitors<br>ophthalmic beta blockers |                                                                                                     |                  |
| <b>Gastrointestinal</b>       | Anorectal Suppuration, Celiac Disease, Clostridium difficile Colitis, Crohn's Disease, Diverticular Disease, Food Poisoning: Other Organisms (stage 3), Functional Digestive Disorders, Gastritis, Hemorrhoids, Hernia (External), Hernia (Hiatal or Reflux Esophagitis), Intussusception (stage 2), Irritable Bowel Syndrome, Gastroenteritis                                                                                                                                                                                                                                                                                                                 | Intestinal corticosteroids agents<br>H2 antagonists<br>prostaglandins<br>proton pump inhibitors            | 2005-2009: Visits prescribed due to the presence of Gastrointestinal Diseases<br>Beginning in 2010, |                  |

A-4

| Body System or Etiology Group | Hospital Discharge data                                                                                                                                                                                                                                                                                                                                                                                                                                                                                                                                                                                                       | Outpatient pharmacy data                      | Home health care                                                                                                                                                                                 | Specialty visits               |
|-------------------------------|-------------------------------------------------------------------------------------------------------------------------------------------------------------------------------------------------------------------------------------------------------------------------------------------------------------------------------------------------------------------------------------------------------------------------------------------------------------------------------------------------------------------------------------------------------------------------------------------------------------------------------|-----------------------------------------------|--------------------------------------------------------------------------------------------------------------------------------------------------------------------------------------------------|--------------------------------|
|                               | Neoplasm, Benign: Adenomatous Polyps, Colon, Small Bowel, Other Gastrointestinal System<br>Peptic Ulcer Disease, Salmonellosis (stage 3), Ulcerative Colitis, Vascular Insufficiency of the Bowels, Complications of Gastrointestinal Treatment, Gastroenteritis (stage 2/3)<br>Other Diseases of Esophagus, Stomach, and Duodenum<br>Other Gastrointestinal Disorders, Other Gastrointestinal Infections (stage 2), Other Gastrointestinal or Abdominal Symptoms<br>Anomaly: Congenital Megacolon, Other Digestive or Hepatobiliary System<br>Burns, Chemical: Esophagus, Stomach, or Small Intestine, Laceration: Esophagus |                                               | the following ICD-9-CM codes were in the record: 520-539,550-579                                                                                                                                 |                                |
| <b>Genitourinary</b>          | Bladder Disorders, Calculus of the Urinary Tract, Glomerulonephritis, Acute, Injury: Urinary Tract, Nephrotic Syndrome (stage 2/3), Renal Failure (stage 2/3), Urethritis, Urinary Tract Infections, Neoplasm, Benign: Urinary Tract, Other Disorders of Kidney or Ureter, Other Urinary Symptoms, Encounter for Dialysis, Anomaly: Defects of Kidney, Defects of Lower Genitourinary Tract, Syphilis: Congenital                                                                                                                                                                                                             | Agents for hyperkalemia and hyperphosphatemia | 2005-2009: Visits prescribed due to the presence of renal failure and Other diseases of the genito-urinary system<br>Beginning in 2010, the following ICD-9-CM codes were in the record: 580-629 | Visits prescribed for dialysis |

| Body System or Etiology Group       | Hospital Discharge data                                                                                                                                                                                                                                                                                                                                                                      | Outpatient pharmacy data                                            | Home health care                                                                                                              | Specialty visits |
|-------------------------------------|----------------------------------------------------------------------------------------------------------------------------------------------------------------------------------------------------------------------------------------------------------------------------------------------------------------------------------------------------------------------------------------------|---------------------------------------------------------------------|-------------------------------------------------------------------------------------------------------------------------------|------------------|
| <b>Gynecological and Obstetrics</b> | Anomaly: External Female Genitalia, Anomaly: Uterus, Dysfunctional Uterine Bleeding, Endometriosis, Neoplasm, Benign: Ovary (stage 2), Pelvic Inflammatory Disease, Uterine Infection, Uterovaginal Prolapse, Vulvovaginitis, Other Disorders of Female Genital System                                                                                                                       |                                                                     |                                                                                                                               |                  |
| <b>Hematological</b>                | Agranulocytosis, Anemia: Aplastic, Acquired (stage 2/3), Folic Acid Deficiency, Hemolytic (stage 2/3), Iron Deficiency, Sickle Cell, Thalassemia, Vitamin B-12 Deficiency, Other Graft versus Host reaction, Hemophilia A or B, Polycythemia Vera, Other Disorders of Blood and Blood-Forming Organs                                                                                         | Iron<br>vitamin B12<br>folic acids                                  | Beginning in 2010, the following ICD-9-CM codes were in the record: 280-289                                                   |                  |
| <b>Hepatobiliary</b>                | Cholecystitis and Cholelithiasis, Cirrhosis of the Liver (stage 2/3), Disorders of Bilirubin Excretion, Hepatitis A, Hepatitis B, Hepatitis C, Hepatitis D, Hepatitis E, Hepatitis G, Hepatitis (Chemical), Pancreatitis, Wilson's Disease, Neoplasm, Benign: Hepatobiliary System, Other Hepatobiliary and Pancreatic Disorders, Other Hepatobiliary Infections, Other Pancreatic Disorders | Interferons<br>blood substitutes and<br>plasmatic protein fractions |                                                                                                                               |                  |
| <b>Immunologic Diseases</b>         | Human Immunodeficiency Virus Type I (HIV) Infection, Other Immunodeficient Disorders, Pneumonia: Pneumocystis carinii                                                                                                                                                                                                                                                                        | Nucleosides and nucleotides<br>reverse transcriptase inhibitors     | 2005-2009: Visits prescribed due to HIV Infections<br>Beginning in 2010, the following ICD-9-CM codes were in the record: 279 |                  |

| Body System or Etiology Group | Hospital Discharge data                                                                                                                                                                                                                                                                                                                                                                                                                                                                                                                                                                                                                                                                                              | Outpatient pharmacy data                                                                                                              | Home health care                                                                                                                                                                        | Specialty visits |
|-------------------------------|----------------------------------------------------------------------------------------------------------------------------------------------------------------------------------------------------------------------------------------------------------------------------------------------------------------------------------------------------------------------------------------------------------------------------------------------------------------------------------------------------------------------------------------------------------------------------------------------------------------------------------------------------------------------------------------------------------------------|---------------------------------------------------------------------------------------------------------------------------------------|-----------------------------------------------------------------------------------------------------------------------------------------------------------------------------------------|------------------|
| <b>Infectious Diseases</b>    | Aspergillosis, Chlamydial Infection Except Trachoma or Pneumonia, Cryptococcosis, Cytomegalovirus Disease (Acquired), Infectious Mononucleosis (stage 2), Mucormycosis, Reye's Syndrome (stage 3), Rubella: Acquired (stage 3), Schistosomiasis, Other Bacterial Infections, Other Fungal Infections, Other Infectious and Parasitic Infections, Other Viral Infections, Cytomegalovirus Disease (Congenital), Parainfluenza Virus Infection, Pneumonia: Chlamydial, Sarcoidosis, Other Respiratory Infections, Scabies                                                                                                                                                                                              |                                                                                                                                       | Beginning in 2010, the following ICD-9-CM codes were in the record: 001-139                                                                                                             |                  |
| <b>Male Genital</b>           | Benign Prostatic Hypertrophy, Gonorrhea: Male, Prostatitis                                                                                                                                                                                                                                                                                                                                                                                                                                                                                                                                                                                                                                                           | Alfa-adrenoreceptor antagonists<br>testosterone 5-alfa reductase inhibitors                                                           |                                                                                                                                                                                         |                  |
| <b>Musculoskeletal</b>        | Vitamin D Deficiency, Dislocation: Knee, Eosinophilia Myalgia Syndrome, Fracture: Acetabulum, Fracture: Calcaneus (stage 2), Fracture: Femur, Except Head or Neck, Fracture: Femur, Head or Neck, Fracture: Fibula (stage 2), Fracture: Humerus (Shaft), Fracture: Humerus (Supracondylar) (stage 2), Fracture: Radial Shaft, Ulna or Olecranon (stage 2), Fracture: Radius, Lower End (stage 2), Fracture: Tibia (stage 2/3), Fracture or Dislocation: Patella (stage 2), Fracture or Sprain: Ankle (stage 2), Fracture, Dislocation, or Sprain: Facial Bones (stage 2/3), Fracture, Dislocation, or Sprain: Foot (stage 2), Fracture, Dislocation, or Sprain: Hip or Pelvis (stage 2/3), Fracture, Dislocation, or | Colchicine<br>uric acid inhibitors<br>antiinflammatory non-steroids<br>gold salts<br>aminoquinolines<br>bisphosphonates<br>calcitonin | 2005-2009: Visits prescribed due to the presence of Arthrosis, Arthritis and other osteo-muscular and connective diseases, and Fractures of femurs and other consequences of fractures. |                  |

A-7

1  
2  
3  
4  
5  
6  
7  
8  
9  
10  
11  
12  
13  
14  
15  
16  
17  
18  
19  
20  
21  
22  
23  
24  
25  
26  
27  
28  
29  
30  
31  
32  
33  
34  
35  
36  
37  
38  
39  
40  
41  
42  
43  
44  
45  
46  
47  
48  
49

| Body System or Etiology Group | Hospital Discharge data                                                                                                                                                                                                                                                                                                                                                                                                                                                                                                                                                                                                                                                                                                                                                                                                                                                                                                                                                                                                                                                                                      | Outpatient pharmacy data                                                                                                                   | Home health care                                                                                       | Specialty visits |
|-------------------------------|--------------------------------------------------------------------------------------------------------------------------------------------------------------------------------------------------------------------------------------------------------------------------------------------------------------------------------------------------------------------------------------------------------------------------------------------------------------------------------------------------------------------------------------------------------------------------------------------------------------------------------------------------------------------------------------------------------------------------------------------------------------------------------------------------------------------------------------------------------------------------------------------------------------------------------------------------------------------------------------------------------------------------------------------------------------------------------------------------------------|--------------------------------------------------------------------------------------------------------------------------------------------|--------------------------------------------------------------------------------------------------------|------------------|
|                               | Sprain: Humerus (Head) or Shoulder (stage 2), Fracture, Dislocation, or Sprain: Wrist or Hand or Fingers (stage 2), Gout, Herniated Intervertebral Disc, Infectious Arthritis (stage 2/3), Injury, Chest Wall, Injury, Knee, Semilunar Cartilages (stage 2), Injury, Open Wound, or Blunt Trauma: Lower Extremity (stage 2), Injury, Open Wound, or Blunt Trauma: Upper Extremity (stage 2/3), Muscular Dystrophy, Osteoarthritis, Osteochondrodysplasia, Osteomalacia, Osteomyelitis (stage 2/3), Osteoporosis, Progressive Systemic Sclerosis, Rheumatoid Arthritis, Scoliosis of the Thoracic Spine, Spondylitis, Ankylosing, Systemic Lupus Erythematosus, Anomaly: Musculoskeletal System, Injury: Other and Ill-Defined Musculoskeletal Sites, Neoplasm, Benign: Musculoskeletal Syst. or Connective Tissue, Other Arthropathies, Bone and Joint Disorders, Other Disorders of Connective Tissue, Other Spinal and Back Disorders, Myasthenia Gravis, Complications of Surgical and Medical Care (stage 1), Injury, Open Wound, or Blunt Trauma: Abdomen or Trunk (stage 2/3), Injury: Other (stage 3) |                                                                                                                                            | Beginning in 2010, the following ICD-9-CM codes were in the record: 710-739                            |                  |
| <b>Neurologic Diseases</b>    | Down's Syndrome, Herpes zoster, Poliomyelitis, Post-Polio Syndrome, Syphilis: Acquired, Tetanus (stage 1), Toxoplasmosis: Acquired (stage 3), Amyotrophic Lateral Sclerosis, Cerebral Palsy, Cerebrovascular Disease, Disease of Nervous System Secondary to Implants or Grafts, Epilepsy, Guillain-Barre Syndrome (stage 2), Headache (stage 2), Huntington's Chorea, Injury: Craniocerebral,                                                                                                                                                                                                                                                                                                                                                                                                                                                                                                                                                                                                                                                                                                               | Anticholinesterase agents<br>anticonvulsivant<br>barbiturates and congeners<br>alprostadil<br>ergot alkaloids<br>5HT1 agonists<br>dopamine | 2005-2009: Visits prescribed due to the presence of Dementia and Alzheimer's syndrome, Parkinson's and |                  |



| Body System or Etiology Group | Hospital Discharge data                                                                                                                                                                                                                                                                                                                                                                                                                                                                                    | Outpatient pharmacy data                 | Home health care                                                                                                                                                                                                         | Specialty visits |
|-------------------------------|------------------------------------------------------------------------------------------------------------------------------------------------------------------------------------------------------------------------------------------------------------------------------------------------------------------------------------------------------------------------------------------------------------------------------------------------------------------------------------------------------------|------------------------------------------|--------------------------------------------------------------------------------------------------------------------------------------------------------------------------------------------------------------------------|------------------|
|                               | Injury: Spine and spinal cord, Meningitis, Encephalitis, and Myelitis: Viral, Meningitis: Bacterial, Mental Retardation, Multiple Sclerosis, Neurofibromatosis Type I [Von Recklinghausen's Disease], Parkinson's Disease, Other CNS Inflammation, Infection, or Disorder, Other Cranial Nerve Disorders, Other Neurological Conditions, Other Peripheral Nerve Disorders, Other Spinal Lesions, Anomaly: Neural Tube Defects, Rubella: Congenital (stage 2), Anomaly: Other Nervous System, Injury: Other | MAO b inhibitors                         | other CNS degenerative disease, hemiplegia, monoplegia, and other associated syndroms, and acute and chronic cerebrovascular diseases<br>Beginning in 2010, the following ICD-9-CM codes were in the record: 320-389,797 |                  |
| <b>Psychological</b>          | Dementia: Primary Degenerative (Alzheimer's or Pick's), Antisocial Personality Disorder, Bipolar Disorder - Major Depressive Episode, Bipolar Disorder - Manic Episode, Depression, Generalized Anxiety Disorder, Obsessive-Compulsive Neurosis, Schizophrenia, Autism, Other Neuroses, Other Psychoses<br>Drug Abuse, Dependence, Intoxication: Alcohol, Amphetamine, Barbiturate, Cannabis, Cocaine, Hallucinogen, Opioid, Other<br>Eating disorders: Anorexia Nervosa, Bulimia Nervosa                  | Antidepressants<br>antipsychotics agents | 2005-2009: Visits prescribed due to the presence of psychoses, neuroses, and mental retardation<br>Beginning in 2010, the following ICD-9-CM codes were in the record: 290-319                                           |                  |

| Body System or Etiology Group | Hospital Discharge data                                                                                                                                                                                                                                                                                                                                                                                                                                                                                                                                                                                                                                                                                                                | Outpatient pharmacy data                                                                                                                                                                         | Home health care                                                                                                                                                            | Specialty visits |
|-------------------------------|----------------------------------------------------------------------------------------------------------------------------------------------------------------------------------------------------------------------------------------------------------------------------------------------------------------------------------------------------------------------------------------------------------------------------------------------------------------------------------------------------------------------------------------------------------------------------------------------------------------------------------------------------------------------------------------------------------------------------------------|--------------------------------------------------------------------------------------------------------------------------------------------------------------------------------------------------|-----------------------------------------------------------------------------------------------------------------------------------------------------------------------------|------------------|
| <b>Respiratory</b>            | Coxsackie and ECHO Infections (stage 2/3), Anomaly: Tracheoesophageal Malformations, Asbestosis, Asthma, Berylliosis, Byssinosis, Chronic Obstructive Pulmonary Disease, Coal Miner's Pneumoconiosis, Croup, Cystic Fibrosis, Emphysema, Hypersensitivity Pneumonitis, Influenza, Mycoplasma pneumoniae Infection, Parainfluenza Virus Infection (stage 2), Pneumonia: Bacterial, Pneumonia: Legionella, Pulmonary Alveolar Proteinosis, Pulmonary Embolism (stage 3), Radiation Pneumonitis, Silicosis, Tuberculosis, Complications of Tracheostomy, Other Disorders of Respiratory System, Other Respiratory Disease Due to External Agents, Other Respiratory Symptoms, Pneumonia: Aspiration, Neoplasm, Benign: Respiratory System | Inhaled corticosteroids<br>beta-2-adrenoreceptor agonists<br>xanthines<br>leucotrienies antagonists<br>cromolyn<br>pancreatic enzymes<br>mucolytics<br>antituberculosis antibiotics<br>isoniazid | 2005-2009: Visits prescribed due to the presence of respiratory diseases<br>Beginning in 2010, the following ICD-9-CM codes were in the record: 460-519                     |                  |
| <b>Skin</b>                   | Herpes Virus Ocular Infection (stage 1), Urticaria, Candida (Monilial) Infections, Clostridial Wound Infection (stage 2), Herpes Simplex Infections, Complications of Surgical and Medical Care (stage 2/3), Anomaly: Integument (Genodermatoses), Decubitus Ulcers, Erythema Multiforme, Erythroderma, Immunologically Mediated Blistering Skin Diseases, Infections of Skin and Subcutaneous Tissue, Neoplasm, Malignant: Carcinoma, Basal Cell (stage 1), Neoplasm: Atypical Nevus (stage 1), Psoriasis Vulgaris, Other Inflammations & Infections of Skin & SubQ Tissue, Burns, Neoplasm, Benign: Skin or Subcutaneous Tissue (stage 1)                                                                                            | Oral and topical antipsoriasis agents                                                                                                                                                            | 2005-2009: Visits prescribed due to the presence of decubitus ulcers and other skin diseases<br>Beginning in 2010, the following ICD-9-CM codes were in the record: 680-709 |                  |

A-10

For peer review only

A-11

1  
2  
3  
4  
5  
6  
7  
8  
9  
10  
11  
12  
13  
14  
15  
16  
17  
18  
19  
20  
21  
22  
23  
24  
25  
26  
27  
28  
29  
30  
31  
32  
33  
34  
35  
36  
37  
38  
39  
40  
41  
42  
43  
44  
45  
46  
47  
48  
49

## Predicting Risk Using a Population Based Longitudinal Database

Louis et al

## STROBE Statement—checklist of items that should be included in reports of observational studies

|                           | Item No | Recommendation                                                                                                                                                                                                                                                                                                                                                                                                                                                         |                                                                                                                                |
|---------------------------|---------|------------------------------------------------------------------------------------------------------------------------------------------------------------------------------------------------------------------------------------------------------------------------------------------------------------------------------------------------------------------------------------------------------------------------------------------------------------------------|--------------------------------------------------------------------------------------------------------------------------------|
| <b>Title and abstract</b> | 1       | (a) Indicate the study's design with a commonly used term in the title or the abstract                                                                                                                                                                                                                                                                                                                                                                                 | See abstract section: Design.                                                                                                  |
|                           |         | (b) Provide in the abstract an informative and balanced summary of what was done and what was found                                                                                                                                                                                                                                                                                                                                                                    | The outcome measures used and what was found are summarized in the sections of the abstract: Main outcome measures and Results |
| <b>Introduction</b>       |         |                                                                                                                                                                                                                                                                                                                                                                                                                                                                        |                                                                                                                                |
| Background/rationale      | 2       | Explain the scientific background and rationale for the investigation being reported                                                                                                                                                                                                                                                                                                                                                                                   | See the Introduction section pages 4 and 5                                                                                     |
| Objectives                | 3       | State specific objectives, including any prespecified hypotheses                                                                                                                                                                                                                                                                                                                                                                                                       | Our objectives are described in the last two paragraphs of the Introduction                                                    |
| <b>Methods</b>            |         |                                                                                                                                                                                                                                                                                                                                                                                                                                                                        |                                                                                                                                |
| Study design              | 4       | Present key elements of study design early in the paper                                                                                                                                                                                                                                                                                                                                                                                                                | See last paragraph of the Introduction and the Methods section                                                                 |
| Setting                   | 5       | Describe the setting, locations, and relevant dates, including periods of recruitment, exposure, follow-up, and data collection                                                                                                                                                                                                                                                                                                                                        | See <u>Study Data and Study Population</u> at beginning of Methods section                                                     |
| Participants              | 6       | (a) <i>Cohort study</i> —Give the eligibility criteria, and the sources and methods of selection of participants. Describe methods of follow-up<br><i>Case-control study</i> —Give the eligibility criteria, and the sources and methods of case ascertainment and control selection. Give the rationale for the choice of cases and controls<br><i>Cross-sectional study</i> —Give the eligibility criteria, and the sources and methods of selection of participants | Our study includes 100% of the adult population<br>See <u>Study Data and Study Population</u> at beginning of Methods section  |
|                           |         | (b) <i>Cohort study</i> —For matched studies, give matching criteria and number of exposed and unexposed<br><i>Case-control study</i> —For matched studies, give matching criteria and the number of controls per case                                                                                                                                                                                                                                                 |                                                                                                                                |
| Variables                 | 7       | Clearly define all outcomes, exposures, predictors, potential confounders, and effect modifiers. Give diagnostic criteria, if applicable                                                                                                                                                                                                                                                                                                                               | See the Dependent variable and Independent variable sections in the Methods section                                            |
| Data sources/ measurement | 8*      | For each variable of interest, give sources of data                                                                                                                                                                                                                                                                                                                                                                                                                    | See the Dependent variable                                                                                                     |

|                        |     |                                                                                                                                                                                                                                                                                                           |                                                                                                                                                                              |
|------------------------|-----|-----------------------------------------------------------------------------------------------------------------------------------------------------------------------------------------------------------------------------------------------------------------------------------------------------------|------------------------------------------------------------------------------------------------------------------------------------------------------------------------------|
|                        |     | and details of methods of assessment (measurement). Describe comparability of assessment methods if there is more than one group                                                                                                                                                                          | and Independent variable sections in the Methods section. In addition we have included an Appendix with detailed mapping to independent variable.                            |
| Bias                   | 9   | Describe any efforts to address potential sources of bias                                                                                                                                                                                                                                                 | See Evaluation of the Models (page 10) in the Methods section                                                                                                                |
| Study size             | 10  | Explain how the study size was arrived at                                                                                                                                                                                                                                                                 | Our study includes 100% of the adult population                                                                                                                              |
| Quantitative variables | 11  | Explain how quantitative variables were handled in the analyses. If applicable, describe which groupings were chosen and why                                                                                                                                                                              | See the Dependent variable and Independent variable sections in the Methods section. In addition we have included an Appendix with detailed mapping to independent variable. |
| Statistical methods    | 12  | (a) Describe all statistical methods, including those used to control for confounding                                                                                                                                                                                                                     | See the Modelling section and Evaluation of the Models section (pages 9 and 10) of the Methods                                                                               |
|                        |     | (b) Describe any methods used to examine subgroups and interactions                                                                                                                                                                                                                                       | See the Modelling section (pages 9 and 10) of the Methods                                                                                                                    |
|                        |     | (c) Explain how missing data were addressed                                                                                                                                                                                                                                                               |                                                                                                                                                                              |
|                        |     | (d) <i>Cohort study</i> —If applicable, explain how loss to follow-up was addressed<br><i>Case-control study</i> —If applicable, explain how matching of cases and controls was addressed<br><i>Cross-sectional study</i> —If applicable, describe analytical methods taking account of sampling strategy | Our study includes 100% of the adult population                                                                                                                              |
|                        |     | (e) Describe any sensitivity analyses                                                                                                                                                                                                                                                                     | See Evaluation of the Models last paragraph of Methods.                                                                                                                      |
| <b>Results</b>         |     |                                                                                                                                                                                                                                                                                                           |                                                                                                                                                                              |
| Participants           | 13* | (a) Report numbers of individuals at each stage of study—eg numbers potentially eligible, examined for eligibility, confirmed eligible, included in the study, completing follow-up, and analysed                                                                                                         | See Page 11 Results section                                                                                                                                                  |
|                        |     | (b) Give reasons for non-participation at each stage                                                                                                                                                                                                                                                      | N/A                                                                                                                                                                          |
|                        |     | (c) Consider use of a flow diagram                                                                                                                                                                                                                                                                        |                                                                                                                                                                              |
| Descriptive data       | 14* | (a) Give characteristics of study participants (eg demographic, clinical, social) and information on exposures and potential confounders                                                                                                                                                                  | See Table 1 and Results section (page 11-14)                                                                                                                                 |
|                        |     | (b) Indicate number of participants with missing data for each variable of interest                                                                                                                                                                                                                       |                                                                                                                                                                              |

|                          |     |                                                                                                                                                                                                              |                                                                          |
|--------------------------|-----|--------------------------------------------------------------------------------------------------------------------------------------------------------------------------------------------------------------|--------------------------------------------------------------------------|
|                          |     | (c) <i>Cohort study</i> —Summarise follow-up time (eg, average and total amount)                                                                                                                             | N/A                                                                      |
| Outcome data             | 15* | <i>Cohort study</i> —Report numbers of outcome events or summary measures over time                                                                                                                          |                                                                          |
|                          |     | <i>Case-control study</i> —Report numbers in each exposure category, or summary measures of exposure                                                                                                         |                                                                          |
|                          |     | <i>Cross-sectional study</i> —Report numbers of outcome events or summary measures                                                                                                                           | See Table 2 and figure and pages 14 and 15 of Results section            |
| Main results             | 16  | (a) Give unadjusted estimates and, if applicable, confounder-adjusted estimates and their precision (eg, 95% confidence interval). Make clear which confounders were adjusted for and why they were included | See pages 13                                                             |
|                          |     | (b) Report category boundaries when continuous variables were categorized                                                                                                                                    |                                                                          |
|                          |     | (c) If relevant, consider translating estimates of relative risk into absolute risk for a meaningful time period                                                                                             |                                                                          |
| Other analyses           | 17  | Report other analyses done—eg analyses of subgroups and interactions, and sensitivity analyses                                                                                                               | See Table 2 and page 13 and 14.                                          |
| <b>Discussion</b>        |     |                                                                                                                                                                                                              |                                                                          |
| Key results              | 18  | Summarise key results with reference to study objectives                                                                                                                                                     | See Discussion section page 16                                           |
| Limitations              | 19  | Discuss limitations of the study, taking into account sources of potential bias or imprecision. Discuss both direction and magnitude of any potential bias                                                   | See Discussion section pages 17 and 18                                   |
| Interpretation           | 20  | Give a cautious overall interpretation of results considering objectives, limitations, multiplicity of analyses, results from similar studies, and other relevant evidence                                   | See Discussion section page 18                                           |
| Generalisability         | 21  | Discuss the generalisability (external validity) of the study results                                                                                                                                        | See Discussion section pages 18 and 19                                   |
| <b>Other information</b> |     |                                                                                                                                                                                                              |                                                                          |
| Funding                  | 22  | Give the source of funding and the role of the funders for the present study and, if applicable, for the original study on which the present article is based                                                | The study was funded by the Emilia-Romagna, region of Italy. See page 3. |

\*Give information separately for cases and controls in case-control studies and, if applicable, for exposed and unexposed groups in cohort and cross-sectional studies.

**Note:** An Explanation and Elaboration article discusses each checklist item and gives methodological background and published examples of transparent reporting. The STROBE checklist is best used in conjunction with this article (freely available on the Web sites of PLoS Medicine at <http://www.plosmedicine.org/>, Annals of Internal Medicine at <http://www.annals.org/>, and Epidemiology at <http://www.epidem.com/>). Information on the STROBE Initiative is available at [www.strobe-statement.org](http://www.strobe-statement.org).

# BMJ Open

## Predicting Risk of Hospitalization or Death: A Retrospective Population Based Analysis

|                                 |                                                                                                                                                                                                                                                                                                                                                                                                                                                                                                                                                                                                                                                                                                                                                                                                         |
|---------------------------------|---------------------------------------------------------------------------------------------------------------------------------------------------------------------------------------------------------------------------------------------------------------------------------------------------------------------------------------------------------------------------------------------------------------------------------------------------------------------------------------------------------------------------------------------------------------------------------------------------------------------------------------------------------------------------------------------------------------------------------------------------------------------------------------------------------|
| Journal:                        | <i>BMJ Open</i>                                                                                                                                                                                                                                                                                                                                                                                                                                                                                                                                                                                                                                                                                                                                                                                         |
| Manuscript ID:                  | bmjopen-2014-005223.R1                                                                                                                                                                                                                                                                                                                                                                                                                                                                                                                                                                                                                                                                                                                                                                                  |
| Article Type:                   | Research                                                                                                                                                                                                                                                                                                                                                                                                                                                                                                                                                                                                                                                                                                                                                                                                |
| Date Submitted by the Author:   | 02-Jul-2014                                                                                                                                                                                                                                                                                                                                                                                                                                                                                                                                                                                                                                                                                                                                                                                             |
| Complete List of Authors:       | Louis, Daniel; Jefferson Medical College, Center for Research in Medical Education and Health Care<br>Robeson, Mary; Jefferson Medical College, Center for Research in Medical Education and Health Care<br>McAna, John; Thomas Jefferson University, Jefferson School of Population Health<br>Maio, Vittorio; Thomas Jefferson University, Jefferson School of Population Health<br>Keith, Scott; Thomas Jefferson University, Department of Pharmacology & Experimental Therapeutics, Division of Biostatistics<br>Liu, Mengdan; Jefferson Medical College, Center for Research in Medical Education and Health Care<br>Gonnella, Joseph; Jefferson Medical College, Center for Research in Medical Education and Health Care<br>Grilli, Roberto; Agenzia Sanitaria e Sociale Regione Emilia-Romagna, |
| <b>Primary Subject Heading</b>: | Health services research                                                                                                                                                                                                                                                                                                                                                                                                                                                                                                                                                                                                                                                                                                                                                                                |
| Secondary Subject Heading:      | Patient-centred medicine                                                                                                                                                                                                                                                                                                                                                                                                                                                                                                                                                                                                                                                                                                                                                                                |
| Keywords:                       | Quality in health care < HEALTH SERVICES ADMINISTRATION & MANAGEMENT, Organisation of health services < HEALTH SERVICES ADMINISTRATION & MANAGEMENT, Health policy < HEALTH SERVICES ADMINISTRATION & MANAGEMENT                                                                                                                                                                                                                                                                                                                                                                                                                                                                                                                                                                                        |
|                                 |                                                                                                                                                                                                                                                                                                                                                                                                                                                                                                                                                                                                                                                                                                                                                                                                         |

SCHOLARONE™  
Manuscripts

## Predicting Risk of Hospitalization or Death: A Retrospective Population Based Analysis

Daniel Z. Louis<sup>1</sup>, Mary Robeson<sup>1</sup>, John McAna<sup>2</sup>, Vittorio Maio<sup>2</sup>, Scott W. Keith<sup>3</sup>, Mengdan Liu<sup>1</sup>, Joseph S. Gonnella<sup>1</sup>, Roberto Grilli<sup>4</sup>

<sup>1</sup>Center for Research in Medical Education and Health Care, Jefferson Medical College of Thomas Jefferson University. 1015 Walnut Street, Suite 319. Philadelphia, PA 19107, USA

<sup>2</sup>Jefferson School of Population Health, Thomas Jefferson University. 901 Walnut Street, 10<sup>th</sup> Floor. Philadelphia, PA 19107, USA

<sup>3</sup>Department of Pharmacology & Experimental Therapeutics, Division of Biostatistics, Thomas Jefferson University. 1015 Chestnut Street, Suite M-100. Philadelphia, PA 19107, USA

<sup>4</sup>Agenzia Sanitaria e Sociale Regione Emilia-Romagna, Viale Aldo Moro, 21. Bologna, 40128 Italy.

**Corresponding author:** Daniel Z. Louis, Jefferson Medical College, 1015 Walnut Street, Suite 319, Philadelphia, PA 19107. USA; Tel: 215-955-6959, [daniel.louis@jefferson.edu](mailto:daniel.louis@jefferson.edu)

**Copyright:** The corresponding author has the right to grant on behalf of all authors and does grant on behalf of all authors, an exclusive license (non-exclusive for Dr. Grilli as a government employee) on a worldwide basis to the BMJ publishing Group Ltd to permit this article (if accepted) to be published in BMJ editions and any other BMJ PGL products and sublicenses such use and exploit all subsidiary rights, as set out in our license.

**Ethical approval:** This study was approved by the Institutional Review Board of Thomas Jefferson University as an expedited retrospective database/record review. The IRB granted a waiver of informed consent.



## Abstract

**Objectives:** Develop predictive models using an administrative health care database that provide information for Patient Centered Medical Homes to proactively identify patients at risk of hospitalization for conditions that may be impacted through improved patient care.

**Design:** Retrospective health care utilization analysis with multivariate logistic regression models.

**Data:** A population-based longitudinal database of residents served by the Emilia-Romagna, Italy health service in the years 2004-2012 including demographic information and utilization of health services by 3,726,380 people age  $\geq 18$  years.

**Outcome measures:** Models designed to predict risk of hospitalization or death for problems that are potentially avoidable were developed and evaluated using the area under the receiver operating curve C-statistic, in terms of their sensitivity, specificity, and positive predictive value, and for calibration to assess performance across levels of predicted risk.

**Results:** Among the 3,726,380 adult residents of Emilia-Romagna at the end of 2011, 449,163 (12.1%) were hospitalized in 2012; 4.2% were hospitalized for the selected conditions or died in 2012 (3.6% hospitalized, 1.3% died). The C-statistic for the model predicting 2012 outcomes was 0.856. The model was well calibrated across categories of predicted risk. For those patients in the highest predicted risk decile group, the average predicted risk was 23.9% and the actual prevalence of hospitalization or death was 24.2%.

**Conclusions:** We have developed a population-based model using a longitudinal administrative database that identifies the risk of hospitalization for residents of the Emilia-Romagna region

1  
2  
3 with a level of performance as high as, or higher than, similar models. The results of this  
4  
5 model, along with profiles of patients identified as high risk are being provided to the physicians  
6  
7 and other health care professionals associated with the Patient Centered Medical Homes to aid in  
8  
9 planning for care management and interventions that may reduce their patients' likelihood of a  
10  
11 preventable, high-cost hospitalization.  
12  
13

#### 14 15 16 17 18 **Strengths and Limitations of this study:** 19

- 20 • This study included the entire adult population of the Emilia-Romagna Region of Italy,  
21 over 3.7 million people.
- 22 • The study used an existing longitudinal administrative health care database with both the  
23 advantage of much lower cost than new data collection and the disadvantage of potential  
24 errors in administrative data.
- 25 • The results of the study are being used to assist in the development of newly formed  
26 Patient Centered Medical Homes.  
27  
28  
29  
30  
31  
32

33 **Keywords:** hospitalization, risk, medical home, patient-centered care  
34

35 **Word Count:** 3,861 (excluding title page, abstract, references, figure, and tables.)  
36  
37  
38  
39  
40  
41  
42  
43  
44  
45  
46  
47  
48  
49  
50  
51  
52  
53  
54  
55  
56  
57  
58  
59  
60

## Introduction

The predominant healthcare delivery system, which has been a passive model, reacting to patients' problems, is shifting to a more proactive model designed to take the initiative in providing care for an increasingly older population that has a greater prevalence of chronic conditions, often with multiple medical and social needs. These changes are driving the reorganization of the primary care system, emphasizing coordination and cooperation among healthcare professionals.<sup>1</sup> Among the approaches to addressing this need has been the establishment of primary care organizations incorporating integrated teams of physicians and other healthcare professionals that “seek to increase the influence of primary care professionals, and in particular general practitioners (GPs), in health planning and resource allocation.”<sup>2</sup> Prominent among these new models of primary care is the Patient Centered Medical Home, an organization in which a team of healthcare providers is engaged in delivering comprehensive, coordinated, patient-centered care to patient defined populations.<sup>3</sup>

Primary care has a central role in the Italian National Health Service (NHS). Twenty one regional governments are responsible for ensuring the delivery of a health benefits package through a network of geographically defined, population-based Local Health Authorities. Primary care physicians work for these authorities as independent contractors and act as “gatekeepers” for specialty and other referral services for their patients.<sup>4</sup>

With the belief that a strong primary care system is conducive to improving population health, the NHS initiated reforms that encouraged primary care physicians to organize into collaborative arrangements. To this end, the Regione Emilia-Romagna (RER), a large northern region with a population of about 4.5 million, has recently launched a plan in its 11 Local Health Authorities to

1  
2  
3 establish Patient-Centered Medical Homes to better coordinate patient care and help patients  
4  
5 avoid unnecessary hospitalizations.  
6  
7

8  
9 The identification of those patients who would benefit most from outreach efforts is fundamental  
10  
11 to achieving these goals of promoting and practicing population health in Patient-Centered  
12  
13 Medical Homes. To accomplish this, predictive models and risk stratification tools are needed to  
14  
15 identify patients at risk of a worsening of their health status. According to Knutson and Bella,<sup>5</sup>  
16  
17 “Predictive models are data-driven, decision-support tools that estimate an individual’s future  
18  
19 potential health care costs and/or opportunities for care management.” A good model will  
20  
21 identify as many of these patients as possible while excluding those for whom these interventions  
22  
23 would be unnecessary or ineffective.  
24  
25  
26  
27

28  
29 The RER has established three objectives for this project: 1) develop predictive models to  
30  
31 identify patients at high risk of hospitalization or death, 2) create “risk of hospitalization” patient  
32  
33 profiles that provide information about their high-risk patients to the general practitioners in the  
34  
35 newly formed Patient-Centered Medical Homes, and 3) assess the extent to which these models  
36  
37 and reports provide additional information useful in the identification of patients who may  
38  
39 benefit from case management or disease management.  
40  
41  
42

43  
44 This paper will address the first of the three goals. We describe the development of a predictive  
45  
46 model using the RER’s regional longitudinal administrative health care database to help identify  
47  
48 patients who are most at risk of hospitalization for conditions that may be impacted through  
49  
50 improved patient care. This model will then be used to inform the providers associated with the  
51  
52 Patient-Centered Medical Homes and aid in their planning for care management and  
53  
54 interventions that can reduce their patients’ likelihood of a preventable, high-cost hospitalization.  
55  
56  
57

## **Methods**

### Study Data and Study Population

The model was developed using the population-based longitudinal health care database of the residents served by the RER Health Service in the years 2004 through 2012.<sup>6</sup> This administrative database includes demographic information for all residents (gender, birth and death dates, location of current residence, and primary care physician), hospital discharge abstract data (ICD-9-CM diagnosis and procedure codes, and admission and discharge dates), emergency room utilization information, outpatient pharmacy data at the individual prescription level, specialty care (laboratory, diagnostics, therapeutic procedures, rehabilitation, and specialist visits), home health data, and information on each primary care physician in the region. Each patient has an anonymous identifier assigned by the RER so that an individual's utilization can be tracked over time without jeopardizing patient privacy.

The study population consisted of all residents of the RER who were at least 18 years of age and still alive as of 31st December 2011.

### Dependent Variable

The dependent variable was defined as the occurrence of a hospitalization for problems that are potentially avoidable, or whose progression may have been avoided or delayed through appropriate patient care, or the death of the individual, either in or out of the hospital, for any reason in 2012. We decided to not limit the hospitalization to emergency admissions, since a planned admission may also be an indicator of a worsening medical problem. In order to

1  
2  
3 operationally define the dependent variable, we (authors JSG and DZL) reviewed the Disease  
4 Staging<sup>7,8</sup> primary diagnostic category and severity stage of all day and inpatient hospital  
5 admissions (for adults age 18+) in RER for one year, to select those admissions that should be  
6 included in the dependent variable.  
7  
8  
9  
10  
11

12  
13 Deliveries, admission for dental diseases or admissions for vague signs or symptoms with no  
14 identified etiology were excluded. Admissions for problems that are not predictable/preventable  
15 were excluded while those where screening may identify problems that can potentially be treated  
16 to avoid progression were included. For example, admissions for stage 1, chronic cholecystitis  
17 or cholelithiasis were excluded, but admissions for advanced stage 2 or 3 complications such as  
18 ascending cholangitis or pancreatitis were included.  
19  
20  
21  
22  
23  
24  
25  
26

27  
28 We felt that inclusion of hospitalization for cancer in the dependent variable should depend on  
29 the ability to either prevent or avoid progression of the disease. We therefore included colon  
30 cancer and cervical cancer in the definition because they are potentially preventable but excluded  
31 all other cancers where prevention/prediction is not currently possible.  
32  
33  
34  
35  
36  
37

38  
39 Inclusion of injuries, burns, or toxic reaction to prescription or non-prescription drugs would  
40 ideally be based on the cause of these problems. Since the etiology of these problems is typically  
41 not available in the administrative data being used in this project, we made the decision to  
42 include or exclude based on our subjective judgment of the likelihood of preventability. For  
43 example, adverse drug reactions were included but burns were excluded from the definition of  
44 the dependent variable.  
45  
46  
47  
48  
49  
50  
51  
52

1  
2  
3 There is no obvious medical reason for a hospital admission for patients with stage 1 diabetes  
4 mellitus or stage 1 essential hypertension without complications. These problems are typically  
5 treatable in the outpatient setting. A hospitalization implies a potential problem in the care of  
6 these patients, so we decided to include these admissions as a part of the dependent variable.<sup>9</sup>  
7  
8  
9  
10  
11  
12

### 13 14 15 16 17 18 Independent Variables 19

20 A broad range of candidate predictor variables was developed taking advantage of the RER  
21 administrative data. The independent variables used for modeling were defined from the RER  
22 administrative data for the years 2004 through 2011. Demographic data included patient age,  
23 sex, and geographic location of residence. We developed a mapping to broad disease categories  
24 defined primarily in terms of the affected body system from home health care data, pharmacy  
25 data, and hospital discharge abstract data. (See Appendix 1.)  
26  
27  
28  
29  
30  
31  
32  
33  
34  
35  
36

37 For those patients who had been hospitalized, more specific diagnostic data were available. We  
38 reviewed the classification of patients hospitalized historically using the Disease Staging  
39 diagnostic category and disease severity stages.<sup>7,8</sup> Based on the frequencies specific diagnostic  
40 category/stage predictor variables were defined for either specific stages of frequent diseases, or  
41 by combinations across similar categories. Predictor variables were defined based on the number  
42 of emergency room visits using the RER classifications system for the urgency of the visit.  
43  
44  
45  
46  
47  
48  
49  
50  
51  
52

53 Pharmacy data were used to identify polypharmacy<sup>10</sup> (defined as the simultaneous use of five or  
54 more active ingredients for at least 15 consecutive days), potential drug-drug interactions  
55  
56  
57  
58  
59  
60

1  
2  
3 (DDI)<sup>11</sup> and potentially inappropriate medication use in patients<sup>12</sup> 65 years and older. Since  
4 cardiovascular disease is highly prevalent, we reviewed the use of cardiovascular drugs and  
5 created a variable for each of the following 11 classes of drugs (oral anti-coagulants, beta-  
6 blockers, angiotensin converting enzyme / angiotensin II receptor blockers, anti-platelets,  
7 calcium channel blockers, anti-arrhythmics, digitalis glycosides, nitrates, diuretics, alfa-blockers,  
8 statins) to account for the complexity of therapeutic regimen at the patient level.  
9  
10  
11  
12  
13  
14  
15  
16

17  
18  
19 To take advantage of the fact that the RER database includes multiple years of data, we created  
20 history variables using the utilization for each year of data available. Since we were working  
21 with the 2011 data to predict hospitalization or death in 2012, we created history variables based  
22 on 2004-2010 data. This set included 83 of the diagnostic category/stage variables as well as 11  
23 variables based on pharmacy utilization such as exposure to polypharmacy and use of  
24 cardiovascular drugs. If the individual had a history of a disease in any of the years from 2004 to  
25 2010 they were flagged as having a history of that disease and this was used as a potential  
26 predictor variable.  
27  
28  
29  
30  
31  
32  
33  
34  
35  
36  
37  
38  
39  
40

### 41 Modeling

42  
43  
44 Logistic regression models were used to estimate predicted probabilities for the occurrence of an  
45 inpatient hospital stay for the selected conditions or death for individual patients. Risk of  
46 hospitalization or death, and the variables that relate to those risks are highly dependent on age  
47 and gender. Regression models were fit in each of 14 gender and age strata using SAS Version  
48 9.2 (SAS Institute, Cary NC). A stepwise process with relaxed covariate entry and retention  
49 criteria (inclusion p-value  $\leq 0.8$ , retention  $\leq 0.5$ ) was used. At each step in this process, an  
50  
51  
52  
53  
54  
55  
56  
57  
58  
59  
60



1  
2  
3 attempt is made to remove any unimportant variables from the model before adding a potentially  
4 important variable. Each addition or deletion of a variable to or from a potential model is a  
5 separate step and, at each step, a new model is fitted. This process results in a reduced, but robust  
6 set of independent variables that predict outcome or that might have importance as adjustment  
7 terms for the model in each age/gender stratum.  
8  
9  
10  
11  
12  
13  
14  
15  
16  
17  
18  
19

### 20 Evaluation of the Models

21  
22 The predictive accuracy of the modelling was evaluated using C-statistics (the area under the  
23 receiver operating characteristics curve), along with three measures traditionally used with  
24 clinical screening tools: sensitivity, specificity and positive predictive value.  
25  
26  
27  
28  
29

30 C-statistics were used to evaluate the models in two ways. The first evaluation consisted of  
31 fitting the model developed using utilization and demographic data from 2011, along with  
32 historical variables based on 2004-2010 data, and outcomes (hospitalization or death) from 2012  
33 and then computing a C-statistic to evaluate how the models performed at predicting those  
34 outcomes on which the models were conditioned. However, this evaluation is not consistent with  
35 evaluating how the data are used in practice. In practice, we have current predictor information,  
36 but the outcomes have not been realized. To better estimate how the models are likely to perform  
37 in this setting, we fit models to outcomes data up to a year prior to the most current available  
38 (e.g., 2011 outcomes modelled with predictors from 2010, along with historical variables based  
39 on 2004-2009 data). We then computed a C-statistic for projections made on the risk of  
40 hospitalization or death outcomes (in 2012) using the next year's predictor information (in 2011).  
41  
42  
43  
44  
45  
46  
47  
48  
49  
50  
51  
52  
53  
54  
55  
56 This way, the models are forced to make projections into the future, but we have the actual  
57  
58  
59  
60

1  
2  
3 observed outcomes data to evaluate the modelling process as it would be used in practice. The  
4  
5 resulting C-statistics obtained from these two model runs were compared.  
6  
7

8  
9 In order to evaluate the performance of the model across different risk thresholds we classified  
10  
11 predicted risk scores. “Very high risk” was defined as patients with a predicted risk of  
12  
13 hospitalization or death in the following year of  $\geq 25\%$  while “high risk” was defined as patients  
14  
15 with a predicted risk of hospitalization of 15-24%. These risk thresholds were selected after  
16  
17 consultation with physicians practicing in the medical homes to yield a total of about 10% of the  
18  
19 1,500 patients enrolled with a typical primary care physician.  
20  
21

## 22 23 **Results**

24  
25  
26  
27 Among the 3,726,380 adult residents of Emilia Romagna at the end of 2011, 449,163 (12.1%)  
28  
29 were hospitalized in 2012; 4.2% were hospitalized for the selected conditions defined earlier or  
30  
31 died in 2012 (3.6% hospitalized, 1.3% died).  
32  
33

34  
35 Table 1 shows the distribution of the demographics (age and gender), number of chronic  
36  
37 conditions, body systems impacted by the selected chronic conditions, polypharmacy and  
38  
39 inappropriate prescribing among the eligible RER residents, as of December 31, 2011. The  
40  
41 table also compares these characteristics of the total adult population of the region to the  
42  
43 subgroups of the population classified in the “very high risk” and “high risk” categories. Based  
44  
45 on the model results, 114,255 individuals were identified as having a predicted risk of  
46  
47 hospitalization or death in 2012 of  $\geq 25\%$  and classified as “very high risk.” An additional  
48  
49 134,610 individuals had a predicted risk of hospitalization or death in 2012 of 15-24% and were  
50  
51 classified as “high risk.”  
52  
53  
54  
55  
56  
57  
58  
59  
60

**Table 1. Demographic and clinical characteristics of the Regione Emilia-Romagna population, overall and by risk category**

|                                         | Total Population * |       | Very High Risk ** |       | High Risk ** |       |
|-----------------------------------------|--------------------|-------|-------------------|-------|--------------|-------|
|                                         | 3,726,380          |       | 114,255           |       | 134,610      |       |
| <b>Gender</b>                           | N.                 | %     | N.                | %     | N.           | %     |
| Male                                    | 1,788,048          | 48.0% | 54,357            | 47.6% | 61,803       | 45.9% |
| Female                                  | 1,938,332          | 52.0% | 59,898            | 52.4% | 72,807       | 54.1% |
| <b>Age groups</b>                       |                    |       |                   |       |              |       |
| 18-24                                   | 258,338            | 6.9%  | 76                | 0.1%  | 105          | 0.1%  |
| 25-34                                   | 499,786            | 13.4% | 302               | 0.3%  | 391          | 0.3%  |
| 35-44                                   | 732,626            | 19.7% | 1,137             | 1.0%  | 1,198        | 0.9%  |
| 45-54                                   | 676,047            | 18.1% | 2,612             | 2.3%  | 2,485        | 1.8%  |
| 55-64                                   | 550,689            | 14.8% | 5,391             | 4.7%  | 5,287        | 3.9%  |
| 65-74                                   | 482,346            | 12.9% | 13,154            | 11.5% | 14,471       | 10.8% |
| 74-85                                   | 364,369            | 9.8%  | 33,430            | 29.3% | 44,857       | 33.3% |
| 85+                                     | 162,179            | 4.4%  | 58,153            | 50.9% | 65,816       | 48.9% |
| <b>Number of Chronic Conditions</b>     |                    |       |                   |       |              |       |
| 0-1                                     | 2,775,888          | 74.5% | 8,176             | 7.2%  | 24,618       | 18.3% |
| 2 or more                               | 950,492            | 25.5% | 106,079           | 92.8% | 109,992      | 81.7% |
| 5 or more                               | 99,337             | 2.7%  | 45,445            | 39.8% | 20,576       | 15.3% |
| <b>Selected Conditions/Body Systems</b> |                    |       |                   |       |              |       |
| Cancer                                  | 99,328             | 2.7%  | 23,872            | 20.9% | 14,305       | 10.6% |
| Cardiovascular                          | 967,796            | 26.0% | 96,157            | 84.2% | 103,749      | 77.1% |
| Male Genitourinary <sup>#</sup>         | 130,609            | 7.3%  | 14,616            | 26.9% | 16,776       | 27.1% |
| Ear, Nose, Throat                       | 5,364              | 0.1%  | 240               | 0.2%  | 242          | 0.2%  |
| Endocrine                               | 429,528            | 11.5% | 40,653            | 35.6% | 37,471       | 27.8% |
| Eye                                     | 114,117            | 3.1%  | 9,558             | 8.4%  | 13,478       | 10.0% |
| Gastrointestinal                        | 580,946            | 15.6% | 74,718            | 65.4% | 66,305       | 49.3% |
| Gynecologic <sup>##</sup>               | 21,806             | 1.1%  | 333               | 0.6%  | 405          | 0.6%  |
| Hematologic                             | 45,022             | 1.2%  | 15,353            | 13.4% | 6,591        | 4.9%  |
| Hepatobiliary                           | 24,785             | 0.7%  | 6,477             | 5.7%  | 3,306        | 2.5%  |
| Immunologic                             | 3,281              | 0.1%  | 464               | 0.4%  | 273          | 0.2%  |
| Infectious Disease                      | 4,723              | 0.1%  | 2,207             | 1.9%  | 727          | 0.5%  |
| Musculoskeletal                         | 419,184            | 11.2% | 43,436            | 38.0% | 41,000       | 30.5% |
| Neurologic                              | 173,751            | 4.7%  | 34,494            | 30.2% | 24,838       | 18.5% |
| Psychological                           | 291,308            | 7.8%  | 43,387            | 38.0% | 33,715       | 25.0% |
| Respiratory                             | 176,830            | 4.7%  | 39,082            | 34.2% | 21,763       | 16.2% |
| Skin                                    | 28,339             | 0.8%  | 7,645             | 6.7%  | 3,008        | 2.2%  |

|                                                                                       |         |       |        |       |        |       |
|---------------------------------------------------------------------------------------|---------|-------|--------|-------|--------|-------|
| Urogenital                                                                            | 37,728  | 1.0%  | 16,501 | 14.4% | 5,740  | 4.3%  |
| <b>Polypharmacy<sup>^</sup></b>                                                       | 609,278 | 16.4% | 92,153 | 80.7% | 92,156 | 68.5% |
| <b>Any potentially inappropriate medications (age 65 years or older)<sup>^^</sup></b> | 257,033 | 25.5% | 51,055 | 48.7% | 49,003 | 39.2% |

\* Adults (age 18 or older) and alive at 31 December 2011.

\*\* "Very high risk" was defined as patients with a predicted risk of hospitalization or death in the following year of  $\geq 25\%$  while "high risk" was defined as patients with a predicted risk of hospitalization of 15-24%.

# Men only.

## Women only.

<sup>^</sup> Polypharmacy is defined as the simultaneous use of five or more active ingredients for at least 15 consecutive days.

<sup>^^</sup> The list of potentially inappropriate medications can be found in: Maio V, Del Canale S, Abouzaid S. Using Explicit Criteria to Evaluate the Quality of Prescribing in Elderly Italian Outpatients: A Cohort Study. *Journal of Clinical Pharmacy and Therapeutics* 2010;35:219-229.

There was little difference across the risk categories by gender. Age distributions for the "very high risk" and "high risk" groups were shifted more towards the older age groups than those in the overall study population. Residents age 85 or older represented about 4.5% of the RER population, but about 50% of the "very high" and "high" predicted risk groups. More than 75% of the residents over age 85 were classified as "very high" or "high" risk. However, age alone was not sufficient to their predict risk. For example, residents between 75 and 84 years of age made up 23% of the "very high" risk group and 41% of the "high" risk group, but over 85% of the residents in this age category had neither "very high" nor "high" predicted risk.

Across age and gender strata, demographics and health care utilization experience in 2011 were the most commonly used independent variables for predicting hospitalization or death in 2012. Selected history variables flagging chronic problems such as cardiovascular disease, diabetes mellitus and chronic renal failure and a history of prescriptions for cardiovascular medications and polypharmacy were also significant predictors.

1  
2  
3 The residents in the two higher risk groups were more likely than others to have multiple chronic  
4 diseases and to experience polypharmacy and inappropriate medication use. The residents  
5 identified as “very high risk” or “high risk” by the model also showed a number of striking  
6 differences from others in terms of the occurrence of some of the most prevalent health  
7 conditions by type and body system. Although cardiovascular conditions were not uncommon in  
8 the total adult population (26.0%), they were far more common among those classified as “very  
9 high risk” and “high risk” (84.2% and 77.1%, respectively). Similarly, gastrointestinal conditions  
10 affected 15.6% of the total population, but were diagnosed in 65.4% of the “very high risk” and  
11 49.3% of the “high risk” patients. Cancer occurred in 2.7% of the total population, but 20.9% of  
12 the “very high risk” and 10.6% of the “high risk” patients had a cancer diagnosis. Mental health  
13 problems were identified in 7.8% of the adult population, but in 34.2% of the “very high risk”  
14 and 25.0% of the “high risk” patients.

15  
16  
17 The C-statistic for the model of 2012 outcomes developed using 2011 predictors and the  
18 C-statistic based on the parameters from the model of 2011 outcomes regressed on 2010  
19 predictors applied to the 2011 predictors and 2012 outcomes were very similar (0.856 and 0.853,  
20 respectively). These results suggest that the relationship between predictors and risk of  
21 hospitalization changed little in one year and that model parameters developed in a prior year can  
22 be used reliably with the most current year’s data to predict unknown outcomes in the next year  
23 with only a minimal loss in performance in this population.

24  
25  
26 Table 2 shows the sensitivity, specificity, positive predictive value and number of true positives  
27 for the model at the two selected cut-off points. The sensitivity (percentage of patients actually  
28 hospitalized who had been identified by the model as having a predicted risk higher than the cut-  
29

off point) was 29.8% for those with the “very high” risk scores. This percentage represents 46,950 of the 157,550 residents of the region who were hospitalized for a selected condition or died in 2012. If we modify the risk score threshold to include individuals with a predicted risk of hospitalization for selected conditions or death of  $\geq 15\%$  (i.e., both the “very high risk” and the “high risk” patients) the sensitivity is .471. The true negative rate (specificity) is very high for both risk thresholds (.981 and .951, respectively).

| Measure                                      | Cut-off points for comparison |                                   |
|----------------------------------------------|-------------------------------|-----------------------------------|
|                                              | "Very high risk"*             | "Very high risk"* + "High risk"** |
| <b>Sensitivity<sup>#</sup></b>               | 0.298                         | 0.471                             |
| <b>Specificity<sup>##</sup></b>              | 0.981                         | 0.951                             |
| <b>Positive Predictive Value<sup>^</sup></b> | 0.411                         | 0.298                             |
| <b>True positives<sup>^^</sup></b>           | 46,950                        | 74,196                            |

\* "Very high risk" is defined as patients with a predicted risk of hospitalization of  $\geq 25\%$ .  
 \*\* "Very high risk" + "High risk", is defined as patients with a predicted risk of hospitalization of  $\geq 15\%$ .  
 # Sensitivity is defined as the proportion of those hospitalized who were predicted to be hospitalized (true positive rate).  
 ## Specificity is the proportion of those not hospitalized who were not predicted to be hospitalized (true negative rate).  
 ^ Positive Predictive Value is the proportion of those predicted to be hospitalized who were actually hospitalized.  
 ^^ True positives are the number of residents who were predicted to be at risk for hospitalization at the predicted risk threshold and were actually hospitalized.

The model appears to be well calibrated across levels of risk. The Figure depicts the RER population divided into groups by deciles of predicted risk of hospitalization or death from the models. The observed prevalence of hospitalization or death is compared to the average predicted risk among individuals in each of the ten predicted risk groups. For example, the

1  
2  
3 overall rate of hospitalization for the selected conditions or death in 2012 was 4.2%. For those  
4  
5 patients in the highest predicted risk decile group, the average predicted risk was 23.9% and the  
6  
7 actual prevalence of hospitalization or death was 24.2%. (Regression coefficients and  
8  
9 significance levels of independent variables for models for each of 14 age and gender strata are  
10  
11 displayed in Appendix 2.)  
12  
13

14  
15  
16 [Insert Figure about here]  
17  
18  
19  
20  
21

## 22 **Discussion**

23  
24 We have developed a population-based model that identifies the risk of hospitalization for all  
25  
26 adult RER residents and does so with a level of performance ( $c=0.85$ ) as high as, or higher than,  
27  
28 similar models. In addition, we believe that the definition of the dependent variable chosen for  
29  
30 our models increases the probability that they are identifying patients who risk can potentially be  
31  
32 improved by appropriate care. A systematic review by Kansagara<sup>13</sup> of models designed to  
33  
34 predict readmissions, showed C-statistic results in the range of 0.55 to 0.83. Recent work by  
35  
36 Billings et al<sup>14</sup> to develop models predictive of emergent admissions in the UK had results  
37  
38 ranging from 0.73 to 0.78. Li Wang, et al. (2013),<sup>15</sup> using information available through the US  
39  
40 Veteran's Administration that also included lab data, demonstrated c-statistics of 0.81 and 0.79,  
41  
42 respectively, for their models of 90-day or 12-month hospitalization or death outcomes. At a  
43  
44 predicted risk of  $\geq 25\%$  our model had a Positive Predictive Value (PPV) of .411. Billings et al<sup>14</sup>  
45  
46 reported a PPV of .417 at a risk threshold of 30. There is a trade-off in using our model, or any  
47  
48 predictive model, between the threshold for follow-up and predictive accuracy. A lower risk  
49  
50 threshold would identify more patients but with a lower prevalence of hospitalization or death.  
51  
52  
53  
54  
55  
56  
57

1  
2  
3 Although previous studies have developed models predictive of hospital care, these models fall  
4 short of the needs of the Patient Centered Medical Homes being implemented in RER. Typically,  
5 these models have focused on specific age groups,<sup>16</sup> conditions, or types of admissions, such as  
6 emergent<sup>14</sup> or unplanned admissions or rehospitalizations, or health insurance plans in the United  
7 States, including private insurance plans, Medicare and Medicaid plans.<sup>17,18</sup> The models we have  
8 developed are applied to the entire adult population of RER. They use existing administrative  
9 data, which makes them cost effective to apply.  
10  
11  
12  
13  
14  
15  
16  
17  
18  
19

20 Patient Centered Medical Homes, including those instituted in RER, are responsible for  
21 addressing the needs of their population and making the best use of their finite resources to  
22 accomplish this. Preventing unnecessary admissions could improve both the quality of care and  
23 health status of the enrolled population, and result in a substantial savings. To accomplish this,  
24 predictive models and risk stratification tools such as those developed for this project are needed  
25 to identify patients at risk of preventable admissions and provide information that can be used by  
26 the medical homes to help manage care.  
27  
28  
29  
30  
31  
32  
33  
34  
35  
36  
37

38 There are some limitations to the model. The model is developed from administrative data.  
39 Administrative data are collected for reimbursement and tracking utilization and not for medical  
40 research. They lack the clinical specificity that would be desirable in assessing an individual's  
41 medical problems. While the hospital discharge abstract data do include diagnostic information  
42 coded using ICD-9-CM, no similar data are available for outpatient encounters in the RER  
43 database. The mortality data available for this project did not include information about cause  
44 of death. Therefore, some proportion of patients whose death was not predictable were included,  
45 limiting model performance. In addition, our models use prior utilization among the predictor  
46  
47  
48  
49  
50  
51  
52  
53  
54  
55  
56  
57  
58  
59  
60



1  
2  
3 variables. With the administrative data we cannot distinguish between appropriate and  
4  
5 inappropriate treatment which may bias our results.  
6  
7

8  
9 Despite the limitations of administrative data, they have many advantages for this project: they  
10  
11 are readily available, relatively inexpensive to analyze and cover large populations over many  
12  
13 years. They are ideal for uncovering patterns of care. If information from the medical records is  
14  
15 needed, the results of these analyses can then be supplemented by focused clinical reviews at the  
16  
17 local level. Also, The RER has a system in place to monitor the quality of diagnosis and  
18  
19 procedure coding in their hospital discharge abstract data. Controls at both the hospital and  
20  
21 regional level assess the validity of coding and the consistency of codes assigned such as  
22  
23 congruity between sex, age and diagnosis and between diagnosis and procedure. The existence  
24  
25 of the RER administrative database made it feasible to develop the models described in this  
26  
27 article at relatively low cost and to update the models over time without additional data  
28  
29 collection that others have found necessary.<sup>14</sup>  
30  
31  
32  
33  
34

35  
36 Currently, these risk scores are being integrated with other information in profiles of high-risk  
37  
38 patients furnished to providers in 12 newly formed medical homes, including 83 primary care  
39  
40 physicians serving a total of about 100,000 patients, in the Parma Local Health Authority located  
41  
42 in RER. Along with the risk scores, this information includes data about previous  
43  
44 hospitalizations, use of referrals, medications, long-term care and home care services, and a  
45  
46 number of process-like quality indicators for diabetic and cardiovascular patients, and for  
47  
48 appropriate medication use in older patients.  
49  
50  
51

52  
53 Of course, model results need to lead to an effective intervention to have a positive impact on  
54  
55 patient care. To this end, we are working with the physicians, nurses, and other health care  
56  
57

1  
2  
3 professionals as well as the administration of the newly formed Medical Homes in Parma to  
4  
5 assist them in understanding how to use the results of these models and in developing potentially  
6  
7 effective interventions. The individual profiles of high risk patients provided to the health care  
8  
9 team in the Medical Homes allow them to trigger specific actions such as inviting patients to  
10  
11 enroll in disease management programs for chronic problems such as heart failure, chronic  
12  
13 obstructive pulmonary disease, or diabetes mellitus, activating home health assistance, initiating  
14  
15 a medication review, or recommending that the patient come in for an office visit. An evaluation  
16  
17 of the use and usefulness of the profiles and intervention is under way.  
18  
19  
20  
21  
22

23 In summary, these models provide a means of identifying patients at high risk for hospitalization.  
24  
25 The risk predictions, in conjunction with the risk profile, show promise as a useful organizational  
26  
27 tool for the regional Patient Centered Medical Homes to develop and implement proactive case  
28  
29 management and disease management programs. The RER is reviewing the results of the Parma  
30  
31 Local Health Authority pilot project of the profiles. Once their usefulness has been further  
32  
33 evaluated, their use will be expanded to other Medical Homes in development in the other Local  
34  
35 Health Authorities in the Emilia-Romagna region. If similar data are available, these models can  
36  
37 be applied in other Italian regions and other countries investing in organization similar to the  
38  
39 Patient Centered Medical Home.  
40  
41  
42  
43  
44  
45  
46  
47  
48  
49  
50  
51  
52  
53  
54  
55  
56  
57  
58  
59  
60

1  
2  
3  
4  
5  
6  
7  
8 **Contributorship statement:** DZL, RG, VM, and JSG were responsible for the conceptualization  
9 of this project. MR, JM, and ML were responsible for creation of the datasets used in this  
10 project. DZL, VM, MR, and JSG were responsible for the definition of analytical variables.  
11 SWK, MR, ML and JM were responsible for modeling and statistical analysis. DZL managed  
12 the research team. RG and JSG advised on the analyses and results. All authors contributed to  
13 the preparation of the manuscript.  
14  
15

16  
17 **Competing interests:** All authors have completed the Unified Competing Interest form and  
18 declare grants from the Regione Emilia-Romagna (Louis, Robeson, McAna, Maio, Keith, Liu,  
19 Gonnella) during the conduct of the study. Louis and Gonnella declare personal fees from  
20 Truven Health Analytics, The National School of Public Health, Portugal, INSIEL Mercato.  
21  
22

23  
24 **Funding:** This research was funded by the Agenzia Sanitaria e Sociale of the Emilia-Romagna  
25 Region, Italy. The resulting models are being used by the Local Health Authority of Parma, Italy  
26 and the Patient Centered Medical Homes located in the Parma Local Health Authority.  
27  
28

29 **Data Sharing:** No additional data available.  
30  
31  
32  
33  
34  
35  
36  
37  
38  
39  
40  
41  
42  
43  
44  
45  
46  
47

---

48 1 Saltman RB, Rico A, Boerma W, eds. Primary care in the driver's seat? Organizational reform  
49 in European primary care. New York, New York: World Health Organization European  
50 Observatory on Health Systems and Policies Series 2006.  
51  
52  
53  
54  
55  
56  
57  
58  
59  
60

2 Smith J, Goodwin N. Towards managed primary care: The role and experience of primary care  
3 organizations. Burlington, VT: Ashgate Publishing Company 2006.

4  
5  
6  
7  
8  
9  
10 3 Defining the PCMH. Agency for Healthcare Research and Quality Web site.

11  
12 [http://www.pcmh.ahrq.gov/portal/server.pt/community/pcmh\\_\\_home/1483/pcmh\\_defining\\_the\\_](http://www.pcmh.ahrq.gov/portal/server.pt/community/pcmh__home/1483/pcmh_defining_the_)  
13 [pcmh\\_v2](http://www.pcmh.ahrq.gov/portal/server.pt/community/pcmh__home/1483/pcmh_defining_the_) (accessed June 30, 2013).

14  
15  
16  
17  
18 4 Lo Scalzo A, Donatini A, Orzella I, et al. Italy: Health system review. *Health Syst Transit*.  
19  
20 2009;**11**(6):1-216.

21  
22  
23  
24 5 Knutson D, Bella M, Llanos K. Predictive Modeling: A Guide for State Medicaid Purchasers.  
25  
26 Center for Health Care Strategies, Inc. 2009.

27  
28  
29 6 The Emilia-Romagna Regional Health Service and the new welfare system: Facilities,  
30  
31 expenditure, and activities as of 31.12.2010. Programs, agreements and organisational models.  
32  
33 Regione Emilia-Romagna Assessorato Politiche per la Salute. Bologna, Italy 2012.

34  
35  
36  
37 7 Gonnella JS, Hornbrook MC, Louis DZ. Staging of Disease: A Case-Mix Measurement. *JAMA*  
38  
39 1984;**251**:637-44.

40  
41  
42  
43 8 Gonnella JS, Louis DZ, Gozum ME, et al, eds. Clinical Criteria for Disease Staging. 6th  
44  
45 edition. Ann Arbor, MI: Truven Health Analytics 2012.

46  
47  
48 9 Louis DZ, F Taroni, R Melotti, et al. Increasing appropriateness of hospital admissions in the  
49  
50 Emilia-Romagna region of Italy. *J Health Serv Res Policy* 2008;**13**(4):202-8.

51  
52  
53  
54 10 Slabaugh L, Maio V, Templin M, et al. Prevalence and risk of polypharmacy amongst elderly  
55  
56 primary care patients in Regione Emilia-Romagna, Italy. *Drug Aging* 2010;**27**:1019-28.

- 1  
2  
3  
4  
5 11 Gagne JJ, Maio V, Rabinowitz C. Prevalence and Predictors of Potential Drug-Drug  
6  
7 Interactions among Ambulatory Patients in Regione Emilia-Romagna, Italy. *J Clin Pharm Ther*  
8  
9 2008;**33**:141-51.  
10  
11  
12 12 Maio V, Del Canale S, Abouzaid S. Using Explicit Criteria to Evaluate the Quality of  
13  
14 Prescribing in Elderly Italian Outpatients: A Cohort Study. *J Clin Pharm Ther* 2010;**35**:219-29.  
15  
16  
17  
18 13 Kansagara D, Englander H, Salanitro A, et al. Risk prediction models for hospital  
19  
20 readmission: A systematic review. Washington, DC: Department of Veterans Affairs US 2011.  
21  
22  
23  
24 14 Billings J, Georghiou T, Blunt I, et al. Choosing a model to predict hospital admission: An  
25  
26 observational study of new variants of predictive models for case finding. *BMJ Open*  
27  
28 2013;**3**(8):e003352. doi: 10.1136/bmjopen-2013-003352 [published Online First: 26 August  
29  
30 2013].  
31  
32  
33  
34 15 Wang L, Porter B, Maynard C, et al. Predicting risk of hospitalization or death among patients  
35  
36 receiving primary care in the Veterans Health Administration. *Med Care* 2013;**51**(4):368-73.  
37  
38  
39  
40 16 Inouye SK, Zhang Y, Jones RN, et al. Risk factors for hospitalization among community-  
41  
42 dwelling primary care older patients: development and validation of a predictive model. *Med*  
43  
44 *Care* 2008;**46**(7):726-31.  
45  
46  
47  
48 17 Lemke KW, Weiner JP, Clark JM. Development and validation of a model for predicting  
49  
50 inpatient hospitalization. *Med Care* 2012;**50**(2):131-9.  
51  
52  
53  
54 18 McAna JF, Crawford AG, Novinger BW, et al. A predictive model of hospitalization risk  
55  
56 among disabled Medicaid enrollees. *Am J Manag Care* 2013;**19**(5):166-74.  
57  
58  
59  
60

1  
2  
3  
4  
5  
6  
7  
8  
9  
10  
11  
12  
13  
14  
15  
16  
17  
18  
19  
20  
21  
22  
23  
24  
25  
26  
27  
28  
29  
30  
31  
32  
33  
34  
35  
36  
37  
38  
39  
40  
41  
42  
43  
44  
45  
46  
47  
48  
49  
50  
51  
52  
53  
54  
55  
56  
57  
58  
59  
60

---

**Figure Legend:**

**Figure. Model calibration: Predicted risk and observed prevalence of hospitalization or death in 2012 by predicted risk decile groups.**

For peer review only

1  
2  
3  
4  
5  
6  
7  
8  
9  
10  
11  
12  
13  
14  
15  
16  
17  
18  
19  
20  
21  
22  
23  
24  
25  
26  
27  
28  
29  
30  
31  
32  
33  
34  
35  
36  
37  
38  
39  
40  
41  
42  
43  
44  
45  
46  
47  
48  
49  
50  
51  
52  
53  
54  
55  
56  
57  
58  
59  
60

**Predicting Risk of Hospitalization or Death: A Retrospective Using a Population Based Longitudinal Database Analysis**

Daniel Z. Louis<sup>1</sup>, Mary Robeson<sup>1</sup>, John McAna<sup>2</sup>, Vittorio Maio<sup>2</sup>, Scott W. Keith<sup>3</sup>, Mengdan Liu<sup>1</sup>, Joseph S. Gonnella<sup>1</sup>, Roberto Grilli<sup>4</sup>

<sup>1</sup>Center for Research in Medical Education and Health Care, Jefferson Medical College of Thomas Jefferson University. 1015 Walnut Street, Suite 319. Philadelphia, PA 19107, USA

<sup>2</sup>Jefferson School of Population Health, Thomas Jefferson University. 901 Walnut Street, 10<sup>th</sup> Floor. Philadelphia, PA 19107, USA

<sup>3</sup>Department of Pharmacology & Experimental Therapeutics, Division of Biostatistics, Thomas Jefferson University. 1015 Chestnut Street, Suite M-100. Philadelphia, PA 19107, USA

<sup>4</sup>Agenzia Sanitaria e Sociale Regione Emilia-Romagna, Viale Aldo Moro, 21. Bologna, 40128 Italy.

**Corresponding author:** Daniel Z. Louis, Jefferson Medical College, 1015 Walnut Street, Suite 319, Philadelphia, PA 19107. USA; Tel: 215-955-6959, [daniel.louis@jefferson.edu](mailto:daniel.louis@jefferson.edu)

**Copyright:** The corresponding author has the right to grant on behalf of all authors and does grant on behalf of all authors, an exclusive license (non-exclusive for Dr. Grilli as a government employee) on a worldwide basis to the BMJ publishing Group Ltd to permit this article (if accepted) to be published in BMJ editions and any ~~other-other~~ BMJ PGL products and sublicenses such use and exploit all subsidiary rights, as set out in our license.

**Ethical approval:** This study was approved by the Institutional Review Board of Thomas Jefferson University as an expedited retrospective database/record review. The IRB granted a waiver of informed consent.

**Competing interests:** ~~All authors have completed the Unified Competing Interest form and declare grants from the Regione Emilia-Romagna (Louis, Robeson, McAna, Maio, Keith, Liu, Gonnella) during the conduct of the study. Louis and Gonnella declare personal fees from Truven Health Analytics, The National School of Public Health, Portugal, INSIEL Mercato.~~

**Abstract**

**Objectives:** Develop predictive models using an administrative health care database that provide information for Patient Centered Medical Homes to proactively identify patients at risk of hospitalization for conditions that may be impacted through improved patient care.

**Design:** Retrospective health care utilization analysis with multivariate logistic regression models.

**Data:** A population-based longitudinal database of residents served by the Emilia-Romagna, Italy health service in the years 2004-2012 including demographic information and utilization of health services by 3,726,380 people age  $\geq 18$  years.

**Outcome measures:** Models designed to predict risk of hospitalization or death for problems that are potentially avoidable were developed and evaluated using the area under the receiver operating curve C-statistic, in terms of their sensitivity, specificity, and positive predictive value, and for calibration to assess performance across levels of predicted risk.

**Results:** Among the 3,726,380 adult residents of Emilia-Romagna at the end of 2011, 449,163 (12.1%) were hospitalized in 2012; 4.2% were hospitalized for the selected conditions or died in 2012 (3.6% hospitalized, 1.3% died). The C-statistic for the model predicting 2012 outcomes was 0.856. The model was well calibrated across categories of predicted risk. For those patients in the highest predicted risk decile group, the average predicted risk was 23.9% and the actual prevalence of hospitalization or death was 24.2%.

**Conclusions:** We have developed a population-based model using a longitudinal administrative database that identifies the risk of hospitalization for residents of the Emilia-Romagna region



1  
2  
3 with a level of performance as high as, or higher than, similar models. The results of this  
4  
5 model, along with profiles of patients identified as high risk are being provided to the physicians  
6  
7 and other health care professionals associated with the Patient Centered Medical Homes to aid in  
8  
9 planning for care management and interventions that may reduce their patients' likelihood of a  
10  
11 preventable, high-cost hospitalization.  
12  
13

### 14 15 16 17 18 **Strengths and Limitations of this study:** 19

- 20  
21 • This study included the entire adult population of the Emilia-Romagna ~~regon~~ Region of  
22 Italy, over 3.7 million people.
- 23  
24 • The study used an existing longitudinal administrative health care database with both the  
25 advantage of much lower cost than new data collection and the disadvantage of potential  
26 errors in administrative data.
- 27  
28 • The results of the study are being used to assist in the development of newly formed  
29 Patient Centered Medical Homes.  
30  
31  
32

33  
34 **Keywords:** hospitalization, risk, medical home, patient-~~centered~~ centered care

35  
36 **Word Count:** 3,547-861 (excluding title page, abstract, references, figure, and tables.)

37  
38 **Contributions of authors:** ~~DZL, RG, VM, and JSG were responsible for responsible for the~~  
39 ~~conceptualization~~ conceptualization of this project. ~~MR, JM, and ML were responsible for~~  
40 ~~creation of the datasets used in this project.~~ ~~DZL, VM, MR, and JSG were responsible for the~~  
41 ~~definition of analytical variables.~~ ~~SWK, MR, ML and JM were responsible for modeling and~~  
42 ~~statistical analysis.~~ ~~DZL managed the research team.~~ ~~RG and JSG advised on the analyses and~~  
43 ~~results.~~ ~~All authors contributed to the preparation of the manuscript.~~  
44  
45

46  
47 **Funding:** ~~This research~~ research was funded by the ~~Agencia Sanitaria e Sociale of the Emilia-~~  
48 ~~Romagna Region, Italy.~~ ~~The resulting models are being used by the Local Health Authority of~~  
49 ~~Parma, Italy and the Patient Centered Medical Homes located in the Parm~~ Parma Local Health  
50 Authority.  
51  
52  
53  
54  
55  
56  
57  
58  
59  
60

## Introduction

The predominant healthcare delivery system, which has been a passive model, reacting to patients' problems, is shifting to a more proactive model designed to take the initiative in providing care for an increasingly older population that has a greater prevalence of chronic conditions, often with multiple medical and social needs. These changes are driving the reorganization of the primary care system, emphasizing coordination and cooperation among healthcare professionals.<sup>1</sup> Among the approaches to addressing this need has been the establishment of primary care organizations incorporating integrated teams of physicians and other healthcare professionals that “seek to increase the influence of primary care professionals, and in particular general practitioners (GPs), in health planning and resource allocation.”<sup>2</sup> Prominent among these new models of primary care is the Patient Centered Medical Home, an organization in which a team of healthcare providers is engaged in delivering comprehensive, coordinated, patient-centered care to patient defined populations.<sup>3</sup>

Primary care has a central role in the Italian National Health Service (NHS). Twenty one regional governments are responsible for ensuring the delivery of a health benefits package through a network of geographically defined, population-based Local Health Authorities. Primary care physicians work for these authorities as independent contractors and act as “gatekeepers” for specialty and other referral services for their patients.<sup>4</sup>

With the belief that a strong primary care system is conducive to improving population health, the NHS initiated reforms that encouraged primary care physicians to organize into collaborative arrangements. To this end, the Regione Emilia-Romagna (RER), a large northern region with a population of about 4.5 million, has recently launched a plan in its 11 Local Health Authorities to

1  
2  
3 establish Patient-Centered Medical Homes to better coordinate patient care and help patients  
4  
5 avoid unnecessary hospitalizations.  
6  
7

8  
9 The identification of those patients who would benefit most from outreach efforts is fundamental  
10  
11 to achieving these goals of promoting and practicing population health in Patient-Centered  
12  
13 Medical Homes. To accomplish this, predictive models and risk stratification tools are needed to  
14  
15 identify patients at risk of a worsening of their health status. According to Knutson and Bella,<sup>5</sup>  
16  
17 “Predictive models are data-driven, decision-support tools that estimate an individual’s future  
18  
19 potential health care costs and/or opportunities for care management.” A good model will  
20  
21 identify as many of these patients as possible while excluding those for whom these interventions  
22  
23 would be unnecessary or ineffective.  
24  
25  
26  
27

28  
29 The RER has established three objectives for this project: 1) develop predictive models to  
30  
31 identify patients at high risk of ~~a progression of their medical problems or who are at risk of~~  
32  
33 ~~developing new medical problems~~ hospitalization or death, 2) create “risk of hospitalization”  
34  
35 patient profiles that provide information about their high-risk patients to the general practitioners  
36  
37 in the newly formed Patient-Centered Medical Homes, and 3) assess the extent to which these  
38  
39 models and reports provide additional information useful in the identification of patients who  
40  
41 may benefit from case management or disease management.  
42  
43  
44  
45

46 This paper will address the first of the three goals. We describe the development of a predictive  
47  
48 model using the RER’s regional longitudinal administrative health care database to help identify  
49  
50 patients who are most at risk of hospitalization for conditions that may be impacted through  
51  
52 improved patient care. This model will then be used to inform the providers associated with the  
53  
54 Patient-Centered Medical Homes and aid in their planning for care management and  
55  
56

1  
2  
3 interventions that can reduce their patients' likelihood of a preventable, high-cost hospitalization.  
4  
5  
6  
7

## 8 Methods

### 9 Study Data and Study Population

10  
11  
12  
13  
14 The model was developed using the population-based longitudinal health care database of the  
15 residents served by the RER Health Service in the years 2004 through 2012.<sup>6</sup> This  
16 administrative database includes demographic information for all residents (gender, birth and  
17 death dates, location of current residence, and primary care physician), hospital discharge  
18 abstract data (ICD-9-CM diagnosis and procedure codes, and admission and discharge dates),  
19 emergency room utilization information, outpatient pharmacy data at the individual prescription  
20 level, specialty care (laboratory, diagnostics, therapeutic procedures, rehabilitation, and specialist  
21 visits), home health data, and information on each primary care physician in the region. Each  
22 patient has an anonymous identifier assigned by the RER so that an individual's utilization can  
23 be tracked over time without jeopardizing patient privacy.  
24  
25  
26  
27  
28  
29  
30  
31  
32  
33  
34  
35  
36  
37

38 The study population consisted of all residents of the RER who were at least 18 years of age and  
39 still alive as of 31st December 2011.  
40  
41  
42  
43  
44  
45

### 46 Dependent Variable

47  
48  
49 The dependent variable was defined as the occurrence of a hospitalization for problems that are  
50 potentially avoidable, or whose progression may have been avoided or delayed through  
51 appropriate patient care, or the death of the individual, either in or out of the hospital, for any  
52  
53  
54  
55  
56  
57  
58  
59  
60

1  
2  
3  
4  
5  
6  
7  
8  
9  
10  
11  
12  
13  
14  
15  
16  
17  
18  
19  
20  
21  
22  
23  
24  
25  
26  
27  
28  
29  
30  
31  
32  
33  
34  
35  
36  
37  
38  
39  
40  
41  
42  
43  
44  
45  
46  
47  
48  
49  
50  
51  
52  
53  
54  
55  
56  
57  
58  
59  
60

reason in 2012. We decided to not limit the hospitalization to emergency admissions, since a planned admission may also be an indicator of a worsening medical problem. In order to operationally define the dependent variable, we ([authors JSG and DZL](#)) reviewed the Disease Staging<sup>7, 8</sup> primary diagnostic category and severity stage of all day and inpatient hospital admissions (for adults age 18+) in RER for one year, to select those admissions that should be included in the dependent variable.

Deliveries, admission for dental diseases or admissions for vague signs or symptoms with no identified etiology were excluded. Admissions for problems that are not predictable/preventable were excluded while those where screening may identify problems that can potentially be treated to avoid progression were included. For example, admissions for stage 1, chronic cholecystitis or cholelithiasis were excluded, but admissions for advanced stage 2 or 3 complications such as ascending cholangitis or pancreatitis were included.

We felt that inclusion of hospitalization for cancer in the dependent variable should depend on the ability to either prevent or avoid progression of the disease. We therefore included colon cancer and cervical cancer in the definition because they are potentially preventable but excluded all other cancers where prevention/prediction is not currently possible.

Inclusion of injuries, burns, or toxic reaction to prescription or non-prescription drugs would ideally be based on the cause of these problems. Since the etiology of these problems is typically not available in the administrative data being used in this project, we made the decision to include or exclude based on our subjective judgment of the likelihood of preventability. For example, adverse drug reactions were included but burns were excluded from the definition of the dependent variable.

1  
2  
3 There is no obvious medical reason for a hospital admission for patients with stage 1 diabetes  
4 mellitus or stage 1 essential hypertension without complications. These problems are typically  
5 treatable in the outpatient setting. A hospitalization implies a potential problem in the care of  
6 these patients, so we decided to include these admissions as a part of the dependent variable.<sup>9</sup>  
7  
8  
9  
10  
11  
12

### 13 14 15 16 17 18 Independent Variables 19

20 A broad range of candidate predictor variables was developed taking advantage of the RER  
21 administrative data. The independent variables used for modeling were defined from the RER  
22 administrative data for the years 2004 through 2011. Demographic data included patient age,  
23 sex, and geographic location of residence. We developed a mapping to broad disease categories  
24 defined primarily in terms of the affected body system from home health care data, pharmacy  
25 data, and hospital discharge abstract data. (See Appendix [1](#).)  
26  
27  
28  
29  
30  
31  
32  
33  
34  
35  
36

37 For those patients who had been hospitalized, more specific diagnostic data were available. We  
38 reviewed the classification of patients hospitalized historically using the Disease Staging  
39 diagnostic category and disease severity stages.<sup>7,8</sup> Based on the frequencies specific diagnostic  
40 category/stage predictor variables were defined for either specific stages of frequent diseases, or  
41 by combinations across similar categories. Predictor variables were defined based on the number  
42 of emergency room visits using the RER classifications system for the urgency of the visit.  
43  
44  
45  
46  
47  
48  
49  
50  
51  
52

53 Pharmacy data were used to identify polypharmacy<sup>10</sup> (defined as the simultaneous use of five or  
54 more active ingredients for at least 15 consecutive days), potential drug-drug interactions  
55  
56  
57  
58  
59  
60

1  
2  
3 (DDI)<sup>11</sup> and potentially inappropriate medication use in patients<sup>12</sup> 65 years and older. Since  
4  
5 cardiovascular disease is highly prevalent, we reviewed the use of cardiovascular drugs and  
6  
7 created a variable for each of the following 11 classes of drugs (oral anti-coagulants, beta-  
8  
9 blockers, angiotensin converting enzyme / angiotensin II receptor blockers, anti-platelets,  
10  
11 calcium channel blockers, anti-arrhythmics, digitalis glycosides, nitrates, diuretics, alfa-blockers,  
12  
13 statins) to account for the complexity of therapeutic regimen at the patient level.  
14  
15  
16

17  
18  
19 To take advantage of the fact that the RER database includes multiple years of data, we created  
20  
21 history variables using the utilization for each year of data available. Since we were working  
22  
23 with the 2011 data to predict hospitalization or death in 2012, we created history variables based  
24  
25 on 2004-2010 data. This set included 83 of the diagnostic category/stage variables as well as 11  
26  
27 variables based on pharmacy utilization such as exposure to polypharmacy and use of  
28  
29 cardiovascular drugs. If the individual had a history of a disease in any of the years from 2004 to  
30  
31 2010 they were flagged as having a history of that disease and this was used as a potential  
32  
33 predictor variable.  
34  
35  
36  
37  
38  
39  
40

#### 41 Modeling

42  
43  
44 Logistic regression models were used to estimate predicted probabilities for the occurrence of an  
45  
46 inpatient hospital stay for the selected conditions or death for individual patients. Risk of  
47  
48 hospitalization or death, and the variables that relate to those risks are highly dependent on age  
49  
50 and gender. Regression models were fit in each of 14 gender and age strata using SAS Version  
51  
52 9.2 (SAS Institute, Cary NC). A stepwise process with relaxed covariate entry and retention  
53  
54 criteria (inclusion p-value  $\leq 0.8$ , retention  $\leq 0.5$ ) was used. At each step in this process, an  
55  
56  
57  
58  
59  
60

1  
2  
3 attempt is made to remove any unimportant variables from the model before adding a potentially  
4 important variable. Each addition or deletion of a variable to or from a potential model is a  
5 separate step and, at each step, a new model is fitted. This process results in a ~~for selecting a~~  
6 reduced, but robust set of independent variables that predict outcome or that might have  
7 importance as adjustment terms for the model in each age/gender stratum.  
8  
9  
10  
11  
12  
13  
14  
15  
16  
17  
18  
19

### 20 Evaluation of the Models

21  
22 The predictive accuracy of the modelling was evaluated using C-statistics (the area under the  
23 receiver operating characteristics curve), along with three measures traditionally used with  
24 clinical screening tools: sensitivity, specificity and positive predictive value.  
25  
26  
27  
28  
29

30 C-statistics were used to evaluate the models in two ways. The first evaluation consisted of  
31 fitting the model developed using utilization and demographic data from 2011, along with  
32 historical variables based on 2004-2010 data, and outcomes (hospitalization or death) from 2012  
33 and then computing a C-statistic to evaluate how the models performed at predicting those  
34 outcomes on which the models were conditioned. However, this evaluation is not consistent with  
35 evaluating how the data are used in practice. In practice, we have current predictor information,  
36 but the outcomes have not been realized. To better estimate how the models are likely to perform  
37 in this setting, we fit models to outcomes data up to a year prior to the most current available  
38 (e.g., 2011 outcomes modelled with predictors from 2010, along with historical variables based  
39 on 2004-2009 data). We then computed a C-statistic for projections made on the risk of  
40 hospitalization or death outcomes (in 2012) using the next year's predictor information (in 2011).  
41  
42  
43  
44  
45  
46  
47  
48  
49  
50  
51  
52  
53  
54  
55  
56 This way, the models are forced to make projections into the future, but we have the actual  
57  
58  
59  
60



1  
2  
3 observed outcomes data to evaluate the modelling process as it would be used in practice. The  
4  
5 resulting C-statistics obtained from these two model runs were compared.  
6  
7

8  
9 In order to evaluate the performance of the model across different risk thresholds we classified  
10  
11 predicted risk scores. “Very high risk” was defined as patients with a predicted risk of  
12  
13 hospitalization or death in the following year of  $\geq 25\%$  while “high risk” was defined as patients  
14  
15 with a predicted risk of hospitalization of 15-24%. These risk thresholds were selected after  
16  
17 consultation with physicians practicing in the medical homes to yield a total of about 10% of the  
18  
19 1,500 patients enrolled with a typical primary care physician.  
20  
21

## 22 23 **Results**

24  
25  
26  
27 Among the 3,726,380 adult residents of Emilia Romagna at the end of 2011, 449,163 (12.1%)  
28  
29 were hospitalized in 2012; 4.2% were hospitalized for the selected conditions defined earlier or  
30  
31 died in 2012 (3.6% hospitalized, 1.3% died).  
32  
33

34  
35 Table 1 shows the distribution of the demographics (age and gender), number of chronic  
36  
37 conditions, body systems impacted by the selected chronic conditions, polypharmacy and  
38  
39 inappropriate prescribing among the eligible RER residents, as of December 31, 2011. The  
40  
41 table also compares these characteristics of the total adult population of the region to the  
42  
43 subgroups of the population classified in the “very high risk” and “high risk” categories. Based  
44  
45 on the model results, 114,255 individuals were identified as having a predicted risk of  
46  
47 hospitalization or death in 2012 of  $\geq 25\%$  and classified as “very high risk.” An additional  
48  
49 134,610 individuals had a predicted risk of hospitalization or death in 2012 of 15-24% and were  
50  
51 classified as “high risk.”  
52  
53  
54  
55  
56  
57  
58  
59  
60

**Table 1. Demographic and clinical characteristics of the Regione Emilia-Romagna population, overall and by risk category**

|                                         | Total<br><del>population</del> Populatio<br><u>n</u> * |       | Very High Risk** |       | High <del>risk</del> Risk** |       |
|-----------------------------------------|--------------------------------------------------------|-------|------------------|-------|-----------------------------|-------|
|                                         | N.                                                     | %     | N.               | %     | N.                          | %     |
|                                         | 3,726,380                                              |       | 114,255          |       | 134,610                     |       |
| <b>Gender</b>                           |                                                        |       |                  |       |                             |       |
| Male                                    | 1,788,048                                              | 48.0% | 54,357           | 47.6% | 61,803                      | 45.9% |
| Female                                  | 1,938,332                                              | 52.0% | 59,898           | 52.4% | 72,807                      | 54.1% |
| <b>Age groups</b>                       |                                                        |       |                  |       |                             |       |
| 18-24                                   | 258,338                                                | 6.9%  | 76               | 0.1%  | 105                         | 0.1%  |
| 25-34                                   | 499,786                                                | 13.4% | 302              | 0.3%  | 391                         | 0.3%  |
| 35-44                                   | 732,626                                                | 19.7% | 1,137            | 1.0%  | 1,198                       | 0.9%  |
| 45-54                                   | 676,047                                                | 18.1% | 2,612            | 2.3%  | 2,485                       | 1.8%  |
| 55-64                                   | 550,689                                                | 14.8% | 5,391            | 4.7%  | 5,287                       | 3.9%  |
| 65-74                                   | 482,346                                                | 12.9% | 13,154           | 11.5% | 14,471                      | 10.8% |
| 74-85                                   | 364,369                                                | 9.8%  | 33,430           | 29.3% | 44,857                      | 33.3% |
| 85+                                     | 162,179                                                | 4.4%  | 58,153           | 50.9% | 65,816                      | 48.9% |
| <b>Number of Chronic Conditions</b>     |                                                        |       |                  |       |                             |       |
| 0-1                                     | 2,775,888                                              | 74.5% | 8,176            | 7.2%  | 24,618                      | 18.3% |
| 2 or more                               | 950,492                                                | 25.5% | 106,079          | 92.8% | 109,992                     | 81.7% |
| 5 or more                               | 99,337                                                 | 2.7%  | 45,445           | 39.8% | 20,576                      | 15.3% |
| <b>Selected Conditions/Body Systems</b> |                                                        |       |                  |       |                             |       |
| Cancer                                  | 99,328                                                 | 2.7%  | 23,872           | 20.9% | 14,305                      | 10.6% |
| Cardiovascular                          | 967,796                                                | 26.0% | 96,157           | 84.2% | 103,749                     | 77.1% |
| Male Genitourinary <sup>#</sup>         | 130,609                                                | 7.3%  | 14,616           | 26.9% | 16,776                      | 27.1% |
| Ear, Nose, Throat                       | 5,364                                                  | 0.1%  | 240              | 0.2%  | 242                         | 0.2%  |
| Endocrine                               | 429,528                                                | 11.5% | 40,653           | 35.6% | 37,471                      | 27.8% |
| Eye                                     | 114,117                                                | 3.1%  | 9,558            | 8.4%  | 13,478                      | 10.0% |
| Gastrointestinal                        | 580,946                                                | 15.6% | 74,718           | 65.4% | 66,305                      | 49.3% |
| Gynecologic <sup>##</sup>               | 21,806                                                 | 1.1%  | 333              | 0.6%  | 405                         | 0.6%  |
| Hematologic                             | 45,022                                                 | 1.2%  | 15,353           | 13.4% | 6,591                       | 4.9%  |
| Hepatobiliary                           | 24,785                                                 | 0.7%  | 6,477            | 5.7%  | 3,306                       | 2.5%  |
| Immunologic                             | 3,281                                                  | 0.1%  | 464              | 0.4%  | 273                         | 0.2%  |
| Infectious Disease                      | 4,723                                                  | 0.1%  | 2,207            | 1.9%  | 727                         | 0.5%  |
| Musculoskeletal                         | 419,184                                                | 11.2% | 43,436           | 38.0% | 41,000                      | 30.5% |
| Neurologic                              | 173,751                                                | 4.7%  | 34,494           | 30.2% | 24,838                      | 18.5% |
| Psychological                           | 291,308                                                | 7.8%  | 43,387           | 38.0% | 33,715                      | 25.0% |

|                                                                                       |                |              |               |              |               |              |
|---------------------------------------------------------------------------------------|----------------|--------------|---------------|--------------|---------------|--------------|
| Respiratory                                                                           | 176,830        | 4.7%         | 39,082        | 34.2%        | 21,763        | 16.2%        |
| Skin                                                                                  | 28,339         | 0.8%         | 7,645         | 6.7%         | 3,008         | 2.2%         |
| Urogenital                                                                            | 37,728         | 1.0%         | 16,501        | 14.4%        | 5,740         | 4.3%         |
| <b>Polypharmacy<sup>^</sup></b>                                                       | <b>609,278</b> | <b>16.4%</b> | <b>92,153</b> | <b>80.7%</b> | <b>92,156</b> | <b>68.5%</b> |
| <b>Any potentially inappropriate medications (age 65 years or older)<sup>^^</sup></b> | <b>257,033</b> | <b>25.5%</b> | <b>51,055</b> | <b>48.7%</b> | <b>49,003</b> | <b>39.2%</b> |

\* Adults (age 18 or older) and alive at 31 December 2011.

\*\* “Very high risk” was defined as patients with a predicted risk of hospitalization or death in the following year of  $\geq 25\%$  while “high risk” was defined as patients with a predicted risk of hospitalization of 15-24%.

# Men only.

## Women only.

<sup>^</sup> Polypharmacy is defined as the simultaneous use of five or more active ingredients for at least 15 consecutive days.

<sup>^^</sup> The list of potentially inappropriate medications can be found in: Maio V, Del Canale S, Abouzaid S. Using Explicit Criteria to Evaluate the Quality of Prescribing in Elderly Italian Outpatients: A Cohort Study. *Journal of Clinical Pharmacy and Therapeutics* 2010;35:219-229.

There was little difference across the risk categories by gender. Age distributions for the “very high risk” and “high risk” groups were shifted more towards the older age groups than those in the overall study population. Residents age 85 or older represented about 4.5% of the RER population, but about 50% of the “very high” and “high” predicted risk groups. More than 75% of the residents over age 85 were classified as “very ~~high~~” or “high” risk. However, age alone was not sufficient to their predict risk. For example, residents between 75 and 84 years of age made up 23% of the “very high” risk group and 41% of the “high” risk group, but over 85% of the residents in this age category had neither “very high” nor “high” predicted risk.

Across age and gender strata, demographics and health care utilization experience in 2011 were the most commonly used independent variables for predicting hospitalization or death in 2012. Selected history variables flagging chronic problems such as cardiovascular disease, diabetes

1  
2  
3 mellitus and chronic renal failure and a history of prescriptions for cardiovascular medications  
4  
5 and polypharmacy were also significant predictors.  
6  
7

8  
9 The residents in the two higher risk groups were more likely than others to have multiple chronic  
10  
11 diseases and to experience polypharmacy and inappropriate medication use. The residents  
12  
13 identified as “very high risk” or “high risk” by the model also showed a number of striking  
14  
15 differences from others in terms of the occurrence of some of the most prevalent health  
16  
17 conditions by type and body system. Although cardiovascular conditions were not uncommon in  
18  
19 the total adult population (26.0%), they were far more common among those classified as “very  
20  
21 high risk” and “high risk” (84.2% and 77.1%, respectively). Similarly, gastrointestinal conditions  
22  
23 affected 15.6% of the total population, but were diagnosed in 65.4% of the “very high risk” and  
24  
25 49.3% of the “high risk” patients. Cancer occurred in 2.7% of the total population, but 20.9% of  
26  
27 the “very high risk” and 10.6% of the “high risk” patients had a cancer diagnosis. Mental health  
28  
29 problems were identified in 7.8% of the adult population, but in 34.2% of the “very high risk”  
30  
31 and 25.0% of the “high risk” patients.  
32  
33  
34  
35  
36  
37

38 The C-statistic for the model of 2012 outcomes developed using 2011 predictors and the  
39  
40 C-statistic based on the parameters from the model of 2011 outcomes regressed on 2010  
41  
42 predictors applied to the 2011 predictors and 2012 ~~outcomes~~outcomes were very similar (0.856  
43  
44 and 0.853, respectively). These results suggest that the relationship between predictors and risk  
45  
46 of hospitalization changed little in one year and that model parameters developed in a prior year  
47  
48 can be used reliably with the most current year’s data to predict unknown outcomes in the next  
49  
50 year with only a minimal loss in performance in this population.  
51  
52  
53  
54  
55  
56  
57  
58  
59  
60

Table 2 shows the sensitivity, specificity, positive predictive value and number of true positives for the model at the two selected cut-off points. The sensitivity (percentage of patients actually hospitalized who had been identified by the model as having a predicted risk higher than the cut-off point) was 29.8% for those with the “very high” risk scores. This percentage represents 46,950 of the 157,550 residents of the region who were hospitalized for a selected condition or died in 2012. If we modify the risk score threshold to include individuals with a predicted risk of hospitalization for selected conditions or death of  $\geq 15\%$  (i.e., both the “very high risk” and the “high risk” patients) the sensitivity is .471. The true negative rate (specificity) is very high for both risk thresholds (.981 and .951, respectively).

| Table 2. Performance of the "Risk of Hospitalization" model for residents identified as "Very High Risk" and "High or Very High Risk"                                                                                                                                                                                                                                                                                                                                                                                                                                                                                                                                                                                                                                                 |                               |                                   |
|---------------------------------------------------------------------------------------------------------------------------------------------------------------------------------------------------------------------------------------------------------------------------------------------------------------------------------------------------------------------------------------------------------------------------------------------------------------------------------------------------------------------------------------------------------------------------------------------------------------------------------------------------------------------------------------------------------------------------------------------------------------------------------------|-------------------------------|-----------------------------------|
| Measure                                                                                                                                                                                                                                                                                                                                                                                                                                                                                                                                                                                                                                                                                                                                                                               | Cut-off points for comparison |                                   |
|                                                                                                                                                                                                                                                                                                                                                                                                                                                                                                                                                                                                                                                                                                                                                                                       | "Very high risk"*             | "Very high risk"* + "High risk"** |
| Sensitivity <sup>3#</sup>                                                                                                                                                                                                                                                                                                                                                                                                                                                                                                                                                                                                                                                                                                                                                             | 0.298                         | 0.471                             |
| Specificity <sup>4##</sup>                                                                                                                                                                                                                                                                                                                                                                                                                                                                                                                                                                                                                                                                                                                                                            | 0.981                         | 0.951                             |
| Positive Predictive Value <sup>5^</sup>                                                                                                                                                                                                                                                                                                                                                                                                                                                                                                                                                                                                                                                                                                                                               | 0.411                         | 0.298                             |
| True positives <sup>6^^</sup>                                                                                                                                                                                                                                                                                                                                                                                                                                                                                                                                                                                                                                                                                                                                                         | 46,950                        | 74,196                            |
| * "Very high risk" is defined as patients with a predicted risk of hospitalization of $\geq 25\%$ .<br>** "Very high risk" + "High risk", is defined as patients with a predicted risk of hospitalization of $\geq 15\%$ .<br># Sensitivity is defined as the proportion of those hospitalized who were predicted to be hospitalized (true positive rate).<br>## Specificity is the proportion of those not hospitalized who were not predicted to be hospitalized (true negative rate).<br>^ Positive Predictive Value is the proportion of those predicted to be hospitalized who were actually hospitalized.<br>^^ True positives are the number of residents who were predicted to be at risk for hospitalization at the predicted risk threshold and were actually hospitalized. |                               |                                   |

1  
2  
3 The model appears to be well calibrated across levels of risk. The Figure depicts the RER  
4  
5 population divided into groups by deciles of predicted risk of hospitalization or death from the  
6  
7 models. The observed prevalence of hospitalization or death is compared to the average  
8  
9 predicted risk among individuals in each of the ten predicted risk groups. For example, the  
10  
11 overall rate of hospitalization for the selected conditions or death in 2012 was 4.2%. For those  
12  
13 patients in the highest predicted risk decile group, the average predicted risk was 23.9% and the  
14  
15 actual prevalence of hospitalization or death was 24.2%. ([Regression coefficients and](#)  
16  
17 [significance levels of independent variables for models for each of 14 age and gender strata are](#)  
18  
19 [displayed in Appendix 2.](#))  
20  
21  
22  
23  
24  
25  
26

27 **Figure. Model calibration: Predicted risk and observed prevalence of hospitalization or death in 2012**  
28 **by predicted risk decile groups.**  
29

30 [\[Insert Figure about here\]](#)  
31  
32  
33  
34  
35

## 36 **Discussion**

37  
38 We have developed a population-based model that identifies the risk of hospitalization for all  
39  
40 adult RER residents and does so with a level of performance ( $c=0.85$ ) as high as, or higher than,  
41  
42 similar models. In addition, we believe that the definition of the dependent variable chosen for  
43  
44 our models increases the probability that they are identifying patients who risk can potentially be  
45  
46 improved by appropriate care. A systematic review by Kansagara<sup>13</sup> of models designed to  
47  
48 predict readmissions, showed C-statistic results in the range of 0.55 to 0.83. Recent work by  
49  
50 Billings et al<sup>14</sup> to develop models predictive of emergent admissions in the UK had results  
51  
52 ranging from 0.73 to 0.78. Li Wang, et al. (2013),<sup>15</sup> using information available through the US  
53  
54  
55  
56  
57  
58  
59  
60

1  
2  
3 Veteran's Administration that also included lab data, demonstrated c-statistics of 0.81 and 0.79,  
4  
5 respectively, for their models of 90-day or 12-month hospitalization or death outcomes. At a  
6  
7 predicted risk of >25% our model had a Positive Predictive Value (PPV) of .411. Billings et al<sup>14</sup>  
8  
9 reported a PPV of .417 at a risk threshold of 30. There is a trade-off in using our model, or any  
10  
11 predictive model, between the threshold for follow-up and predictive accuracy. A lower risk  
12  
13 threshold would identify more patients but with a lower prevalence of hospitalization or death.  
14  
15  
16  
17

18 Although previous studies have developed models predictive of hospital care, these models fall  
19  
20 short of the needs of the Patient Centered Medical Homes being implemented in RER. Typically,  
21  
22 these models have focused on specific age groups,<sup>16</sup> conditions, or types of admissions, such as  
23  
24 emergent<sup>14</sup> or unplanned admissions or rehospitalizations, or health insurance plans in the United  
25  
26 States, including private insurance plans, Medicare and Medicaid plans.<sup>17,18</sup> The models we have  
27  
28 developed are applied to the entire adult population of RER. They use existing administrative  
29  
30 data, which makes them cost effective to apply.  
31  
32  
33  
34  
35

36 Patient Centered Medical Homes, including those instituted in RER, are responsible for  
37  
38 addressing the needs of their population and making the best use of their finite resources to  
39  
40 accomplish this. Preventing unnecessary admissions could improve both the quality of care and  
41  
42 health status of the enrolled population, and result in a substantial savings. To accomplish this,  
43  
44 predictive models and risk stratification tools such as those developed for this project are needed  
45  
46 to identify patients at risk of preventable admissions and provide information that can be used by  
47  
48 the medical homes to help manage care.  
49  
50  
51  
52

53 There are some limitations to the model. The model is developed from administrative data.

54 Administrative data are collected for reimbursement and tracking utilization and not for medical  
55  
56  
57  
58  
59  
60

1  
2  
3 research. They lack the clinical specificity that would be desirable in assessing an individual's  
4  
5 medical problems. While the hospital discharge abstract data do include diagnostic information  
6  
7 coded using ICD-9-CM, no similar data are available for outpatient encounters in the RER  
8  
9  
10 database. The mortality data available for this project did not include information about cause  
11  
12 of death. Therefore, some proportion of patients whose death was not predictable were included,  
13  
14 limiting model performance. In addition, our models use prior utilization among the predictor  
15  
16 variables. With the administrative data we cannot distinguish between appropriate and  
17  
18 inappropriate treatment which may bias our results.  
19

20  
21  
22 Despite the limitations of administrative data, they have many advantages for this project: they  
23  
24 are readily available, relatively inexpensive to analyze and cover large populations over many  
25  
26 years. They are ideal for uncovering patterns of care. If information from the medical records is  
27  
28 needed, the results of these analyses can then be supplemented by focused clinical reviews at the  
29  
30 local level. Also, The RER has a system in place to monitor the quality of diagnosis and  
31  
32 procedure coding in their hospital discharge abstract data. Controls at both the hospital and  
33  
34 regional level assess the validity of coding and the consistency of codes assigned such as  
35  
36 congruity between sex, age and diagnosis and between diagnosis and procedure. The existence  
37  
38 of the RER administrative database made it feasible to develop the models described in this  
39  
40 article at relatively low cost and to update the models over time without additional data  
41  
42 collection that others have found necessary.<sup>14</sup>  
43  
44  
45  
46  
47  
48

49  
50 Currently, these risk scores are being integrated with other information in profiles of high-risk  
51  
52 patients furnished to providers in 12 newly formed medical homes, including 83 primary care  
53  
54 physicians serving a total of about 100,000 patients, in the Parma Local Health Authority located  
55  
56



1  
2  
3 in RER. Along with the risk scores, this information includes data about previous  
4  
5 hospitalizations, use of referrals, medications, long-term care and home care services, and a  
6  
7 number of process-like quality indicators for diabetic and cardiovascular patients, and for  
8  
9 appropriate medication use in older patients.  
10

11  
12  
13 Of course, model results need to lead to an effective intervention to have a positive impact on  
14  
15 patient care. To this end, we are working with the physicians, nurses, and other health care  
16  
17 professionals as well as the administration of the newly formed Medical Homes in Parma to  
18  
19 assist them in understanding how to use the results of these models and in developing potentially  
20  
21 effective interventions. The individual profiles of high risk patients provided to the health care  
22  
23 team in the Medical Homes allow them to trigger specific actions such as inviting patients to  
24  
25 enroll in disease management programs for chronic problems such as heart failure, chronic  
26  
27 obstructive pulmonary disease, or diabetes mellitus, activating home health assistance, initiating  
28  
29 a medication review, or recommending that the patient come in for an office visit. An evaluation  
30  
31 of the use and usefulness of these profiles and intervention is under way.  
32  
33  
34  
35  
36  
37

38 In summary, these models provide a means of identifying patients at high risk for hospitalization.  
39  
40 The risk predictions, in conjunction with the risk profile, show promise as a useful organizational  
41  
42 tool for the regional Patient Centered Medical Homes to develop and implement proactive case  
43  
44 management and disease management programs. The RER is reviewing the results of the Parma  
45  
46 Local Health Authority pilot project of the profiles. Once their usefulness has been further  
47  
48 evaluated, their use will be expanded to other Medical Homes in development in the other Local  
49  
50 Health Authorities in the Emilia-Romagna region. If similar data are available, these models can  
51  
52  
53  
54  
55  
56  
57  
58  
59  
60

1  
2  
3  
4  
5  
6  
7  
8  
9  
10  
11  
12  
13  
14  
15  
16  
17  
18  
19  
20  
21  
22  
23  
24  
25  
26  
27  
28  
29  
30  
31  
32  
33  
34  
35  
36  
37  
38  
39  
40  
41  
42  
43  
44  
45  
46  
47  
48  
49  
50  
51  
52  
53  
54  
55  
56  
57  
58  
59  
60

be applied in other Italian regions and other countries investing in organization similar to the Patient Centered Medical Home.

For peer review only

1  
2  
3  
4  
5  
6  
7  
8  
9  
10  
11  
12  
13  
14  
15  
16  
17  
18  
19  
20  
21  
22  
23  
24  
25  
26  
27  
28  
29  
30  
31  
32  
33  
34  
35  
36  
37  
38  
39  
40  
41  
42  
43  
44  
45  
46  
47  
48  
49  
50  
51  
52  
53  
54  
55  
56  
57  
58  
59  
60

**Figure Legend:**

**Figure. Model calibration: Predicted risk and observed prevalence of hospitalization or death in 2012 by predicted risk decile groups.**

**Contributorship statement:** DZL, RG, VM, and JSG were responsible for the conceptualization of this project. MR, JM, and ML were responsible for creation of the datasets used in this project. DZL, VM, MR, and JSG were responsible for the definition of analytical variables. SWK, MR, ML and JM were responsible for modeling and statistical analysis. DZL managed the research team. RG and JSG advised on the analyses and results. All authors contributed to the preparation of the manuscript.

**Competing interests:** All authors have completed the Unified Competing Interest form and declare grants from the Regione Emilia-Romagna (Louis, Robeson, McAna, Maio, Keith, Liu, Gonnella) during the conduct of the study. Louis and Gonnella declare personal fees from Truven Health Analytics, The National School of Public Health, Portugal, INSIEL Mercato.

**Funding:** This research was funded by the Agenzia Sanitaria e Sociale of the Emilia-Romagna Region, Italy. The resulting models are being used by the Local Health Authority of Parma, Italy and the Patient Centered Medical Homes located in the Parma Local Health Authority.

**Data Sharing:** No additional data available.

1  
2  
3  
4  
5 1 Saltman RB, Rico A, Boerma W, eds. Primary care in the driver's seat? Organizational reform  
6  
7 in European primary care. New York, New York: World Health Organization European  
8  
9 Observatory on Health Systems and Policies Series 2006.

10  
11  
12 2 Smith J, Goodwin N. Towards managed primary care: The role and experience of primary care  
13  
14 organizations. Burlington, VT: Ashgate Publishing Company 2006.

15  
16  
17 3 Defining the PCMH. Agency for Healthcare Research and Quality Web site.

18  
19  
20 [http://www.pcmh.ahrq.gov/portal/server.pt/community/pcmh\\_\\_home/1483/pcmh\\_defining\\_the\\_](http://www.pcmh.ahrq.gov/portal/server.pt/community/pcmh__home/1483/pcmh_defining_the_)  
21  
22 [pcmh\\_v2](http://www.pcmh.ahrq.gov/portal/server.pt/community/pcmh__home/1483/pcmh_defining_the_) (accessed June 30, 2013).

23  
24  
25 4 Lo Scalzo A, Donatini A, Orzella I, et al. Italy: Health system review. *Health Syst Transit*.  
26  
27 2009;**11**(6):1-216.

28  
29  
30 5 Knutson D, Bella M, Llanos K. Predictive Modeling: A Guide for State Medicaid Purchasers.  
31  
32 Center for Health Care Strategies, Inc. 2009.

33  
34  
35 6 The Emilia-Romagna Regional Health Service and the new welfare system: Facilities,  
36  
37 expenditure, and activities as of 31.12.2010. Programs, agreements and organisational models.  
38  
39 Regione Emilia-Romagna Assessorato Politiche per la Salute. Bologna, Italy 2012.

40  
41  
42 7 Gonnella JS, Hornbrook MC, Louis DZ. Staging of Disease: A Case-Mix Measurement. *JAMA*  
43  
44 1984;**251**:637-44.

45  
46  
47 8 Gonnella JS, Louis DZ, Gozum ME, et al, eds. Clinical Criteria for Disease Staging. 6th  
48  
49 edition. Ann Arbor, MI: Truven Health Analytics 2012.

1  
2  
3  
4  
5 9 Louis DZ, F Taroni, R Melotti, et al. Increasing appropriateness of hospital admissions in the  
6  
7 Emilia-Romagna region of Italy. *J Health Serv Res Policy* 2008;**13**(4):202-8.

8  
9  
10 10 Slabaugh L, Maio V, Templin M, et al. Prevalence and risk of polypharmacy amongst elderly  
11  
12 primary care patients in Regione Emilia-Romagna, Italy. *Drug Aging* 2010;**27**:1019-28.

13  
14  
15 11 Gagne JJ, Maio V, Rabinowitz C. Prevalence and Predictors of Potential Drug-Drug  
16  
17 Interactions among Ambulatory Patients in Regione Emilia-Romagna, Italy. *J Clin Pharm Ther*  
18  
19 2008;**33**:141-51.

20  
21  
22 12 Maio V, Del Canale S, Abouzaid S. Using Explicit Criteria to Evaluate the Quality of  
23  
24 Prescribing in Elderly Italian Outpatients: A Cohort Study. *J Clin Pharm Ther* 2010;**35**:219-29.

25  
26  
27 13 Kansagara D, Englander H, Salanitro A, et al. Risk prediction models for hospital  
28  
29 readmission: A systematic review. Washington, DC: Department of Veterans Affairs US 2011.

30  
31  
32 14 Billings J, Georghiou T, Blunt I, et al. Choosing a model to predict hospital admission: An  
33  
34 observational study of new variants of predictive models for case finding. *BMJ Open*  
35  
36 2013;**3**(8):e003352. doi: 10.1136/bmjopen-2013-003352 [published Online First: 26 August  
37  
38 2013].

39  
40  
41 15 Wang L, Porter B, Maynard C, et al. Predicting risk of hospitalization or death among patients  
42  
43 receiving primary care in the Veterans Health Administration. *Med Care* 2013;**51**(4):368-73.

44  
45  
46 16 Inouye SK, Zhang Y, Jones RN, et al. Risk factors for hospitalization among community-  
47  
48 dwelling primary care older patients: development and validation of a predictive model. *Med*  
49  
50 *Care* 2008;**46**(7):726-31.

1  
2  
3  
4  
5 17 Lemke KW, Weiner JP, Clark JM. Development and validation of a model for predicting  
6  
7 inpatient hospitalization. *Med Care* 2012;**50**(2):131-9.  
8

9  
10 18 McAna JF, Crawford AG, Novinger BW, et al. A predictive model of hospitalization risk  
11  
12 among disabled Medicaid enrollees. *Am J Manag Care* 2013;**19**(5):166-74.  
13  
14

15  
16  
17  
18  
19  
20  
21  
22  
23  
24  
25  
26  
27  
28  
29  
30  
31  
32  
33  
34  
35  
36  
37  
38  
39  
40  
41  
42  
43  
44  
45  
46  
47  
48  
49  
50  
51  
52  
53  
54  
55  
56  
57  
58  
59  
60

For peer review only

1  
2  
3  
4  
5  
6  
7  
8  
9  
10  
11  
12  
13  
14  
15  
16  
17  
18  
19  
20  
21  
22  
23  
24  
25  
26  
27  
28  
29  
30  
31  
32  
33  
34  
35  
36  
37  
38  
39  
40  
41  
42  
43  
44  
45  
46  
47  
48  
49  
50  
51  
52  
53  
54  
55  
56  
57  
58  
59  
60

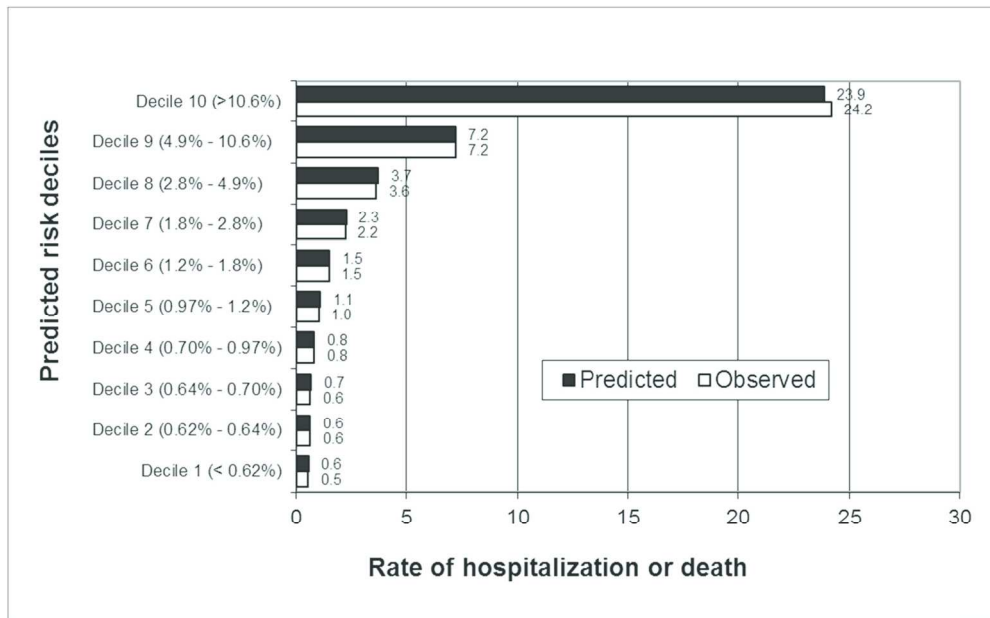

Model calibration: Predicted risk and observed prevalence of hospitalization or death in 2012 by predicted risk decile groups  
165x102mm (300 x 300 DPI)

Review only

1  
2  
3  
4  
5  
6  
7  
8  
9  
10  
11  
12  
13  
14  
15  
16  
17  
18  
19  
20  
21  
22  
23  
24  
25  
26  
27  
28  
29  
30  
31  
32  
33  
34  
35  
36  
37  
38  
39  
40  
41  
42  
43  
44  
45  
46  
47  
48  
49

**Appendix 1: Mapping to Body System or Etiology Groups**

| <b>Body System or Etiology Group</b> | <b>Hospital Discharge data</b>                                                                                                                                                                                                                                                                                                                                                                                                                                                                                                                                                                                                                                                                                                                                                                                                                                                                                                                                                                                                                                                                                                                                                                                                                                                                                                                | <b>Outpatient pharmacy data</b>     | <b>Home health care</b>                                                                                                                                    | <b>Specialty visits</b>                                                                                                   |
|--------------------------------------|-----------------------------------------------------------------------------------------------------------------------------------------------------------------------------------------------------------------------------------------------------------------------------------------------------------------------------------------------------------------------------------------------------------------------------------------------------------------------------------------------------------------------------------------------------------------------------------------------------------------------------------------------------------------------------------------------------------------------------------------------------------------------------------------------------------------------------------------------------------------------------------------------------------------------------------------------------------------------------------------------------------------------------------------------------------------------------------------------------------------------------------------------------------------------------------------------------------------------------------------------------------------------------------------------------------------------------------------------|-------------------------------------|------------------------------------------------------------------------------------------------------------------------------------------------------------|---------------------------------------------------------------------------------------------------------------------------|
| <b>Cancer</b>                        | Neoplasm, Malignant:<br>Cardiovascular, Hypopharynx, Oral Cavity, Oropharynx, Salivary Glands and Mandible, Other Endocrine System, Larynx, Glottis, Larynx, Subglottic, Larynx, Supraglottic, Nasopharyngeal, Sinuses, Ocular Melanoma, Other Eye and Periocular, Colon and Rectum, Esophagus, Small Bowel, Stomach, Other Gastrointestinal System, Bladder, Urinary, Kidneys, Other Genitourinary System, Breast (Female), Cervix Uteri, Endometrium, Ovaries, Vagina, Vulva, Other Female Genitalia, Hodgkin's Lymphoma, Multiple Myeloma, Mastocytosis, Pancreas, Other Hepatobiliary Tract, Breast (Male), Penile, Prostate, Testicular, Primary Bone, Waldenstrom's Macroglobulinemia, Nonspecific Sites, Unspecified Primary Site, Lungs, Bronchi, or Mediastinum, Hodgkin's Disease Lymphocytic Depletion, Hodgkin's Disease Lymphocytic Predominance, Hodgkin's Disease Mixed Cellularity, Hodgkin's Disease Nodular Sclerosis, Lymphatic and Hematopoietic (Other Types), Lymphoma, Cutaneous T Cell (Mycosis Fungoides), Lymphoma (Diffuse Mixed Small and Large Cell), Lymphoma (Diffuse Large Cell), Lymphoma (Follicular Predominantly Large Cell), Lymphoma (Histiocytic Cell), Lymphoma (Lymphoblastic), Other Respiratory System, Carcinoma (Basal Cell stage 2/3), Carcinoma (Squamous Cell), Melanoma, Other Skin and Soft | Antineoplastics<br>5HT3 Antagonists | 2005-2009: Visits prescribed due to the presence of cancer. Beginning in 2010, the following ICD-9-CM codes were in the record: 140-208, 235-239, V10, V16 | Visits prescribed for radiation therapy, or for Injection or infusion of chemotherapeutic Substances for cancer treatment |

A-1



| Body System or Etiology Group | Hospital Discharge data                                                                                                                                                                                                                                                                                                                                                                                                                                                                                                                                                                                                                                                                                                                                                                                                                                                          | Outpatient pharmacy data                                                                                                                                                                        | Home health care                                                                                                                                                                                                                                                                             | Specialty visits |
|-------------------------------|----------------------------------------------------------------------------------------------------------------------------------------------------------------------------------------------------------------------------------------------------------------------------------------------------------------------------------------------------------------------------------------------------------------------------------------------------------------------------------------------------------------------------------------------------------------------------------------------------------------------------------------------------------------------------------------------------------------------------------------------------------------------------------------------------------------------------------------------------------------------------------|-------------------------------------------------------------------------------------------------------------------------------------------------------------------------------------------------|----------------------------------------------------------------------------------------------------------------------------------------------------------------------------------------------------------------------------------------------------------------------------------------------|------------------|
|                               | Tissue<br>Neoplasm:<br>Pheochromocytoma, Eyelid, Central Nervous System,<br>Lymphatic or Hematopoietic<br>Leukemia:<br>Acute Lymphocytic, Acute Nonlymphocytic, Chronic<br>Lymphocytic, Chronic Myelogenous, Other Types<br>Encounter for: Chemotherapy, Radiation Therapy<br>ICD-9-CM Procedure codes: 99.25, 99.28, 00.10,00.15,92.2x                                                                                                                                                                                                                                                                                                                                                                                                                                                                                                                                          |                                                                                                                                                                                                 |                                                                                                                                                                                                                                                                                              |                  |
| <b>Cardiovascular</b>         | Aneurysm: Abdominal, Thoracic<br>Anomaly: Patent Ductus Arteriosus, Atrial Septal Defect,<br>Atrioventricular Defects, Coarctation of the Aorta, Other<br>Congenital Heart Disease, Pulmonary Valve Stenosis,<br>Tetralogy of Fallot (stage 3), Transposition of the Great<br>Arteries, Ventricular Septal Defects, Other Circulatory<br>System<br>Aortic: Regurgitation, Stenosis<br>Mitral: Regurgitation, Stenosis<br>Neoplasm: Benign of the Cardiovascular System<br>Arrhythmias, Cardiomyopathies, Conduction Disorders,<br>Congestive Heart Failure, Coronary Artery Disease Prior<br>Coronary Revascularization, Coronary Artery Disease w/o<br>Prior, Coronary Revascularization, Essential Hypertension,<br>Infective, Endocarditis, Pericarditis: Chronic (stage 2/3),<br>Viral or Traumatic (stage 2/3)<br>Periarteritis Nodosa, Raynaud's Disease, Thromboangiitis, | Oral anti-coagulants<br>beta-blockers<br>ACE/ARB<br>anti-platelets<br>calcium channel blockers<br>anti-arrhythmics<br>digitalis glycosides<br>nitrates<br>diuretics<br>alfa-blockers<br>statins | 2005-2009: Visits<br>prescribed due to<br>the presence of<br>Congestive Heart<br>Failure or not-well<br>defined<br>cardiopathy, and<br>other diseases of<br>cardiovascular<br>system.<br>Beginning in 2010,<br>the following ICD-<br>9-CM-CM codes<br>were in the record:<br>390-454,456-459 |                  |

A-2

1  
2  
3  
4  
5  
6  
7  
8  
9  
10  
11  
12  
13  
14  
15  
16  
17  
18  
19  
20  
21  
22  
23  
24  
25  
26  
27  
28  
29  
30  
31  
32  
33  
34  
35  
36  
37  
38  
39  
40  
41  
42  
43  
44  
45  
46  
47  
48  
49

| Body System or Etiology Group | Hospital Discharge data                                                                                                                                                                                                                                                                                                                                                                                                                                                                                                                                                                                                                                           | Outpatient pharmacy data                                                                            | Home health care                                                                                                                                     | Specialty visits |
|-------------------------------|-------------------------------------------------------------------------------------------------------------------------------------------------------------------------------------------------------------------------------------------------------------------------------------------------------------------------------------------------------------------------------------------------------------------------------------------------------------------------------------------------------------------------------------------------------------------------------------------------------------------------------------------------------------------|-----------------------------------------------------------------------------------------------------|------------------------------------------------------------------------------------------------------------------------------------------------------|------------------|
|                               | Obliterans, Thrombophlebitis, Tibial, Iliac, Femoral, or Popliteal Artery Disease, Varicose Veins of Lower Extremities, Secondary Hypertension, Budd Chiari Syndrome, Rheumatic Fever (stage 2/3) Vasculitis<br>Other: Atherosclerosis, Cardiac Conditions, Cardiovascular Symptoms, Circulatory Disorders, Diseases of Arteries, Diseases of Veins, Disorders of Pulmonary Circulation, Lymphatic Disorders                                                                                                                                                                                                                                                      |                                                                                                     |                                                                                                                                                      |                  |
| <b>Endocrine</b>              | Adrenal Insufficiency, Cushing's Syndrome, Diabetes insipidus,<br>Diabetes Mellitus Type 1, Diabetes Mellitus Type 2 and Hyperglycemic States,Hyperthyroidism, Hypoglycemia, Hypothyroidism, Monotropic Hormone Deficiency, Primary Amyloidosis, Thyroiditis, Klinefelter's Syndrome, Turner's or Noonan's Syndrome, Obesity<br>Goiter: Nontoxic or Euthyroid (stage 2/3)<br>Neoplasm, Benign: Acromegaly, Adenoma, Parathyroid, Hyperparathyroidism, Primary Hyperaldosteronism, Other Endocrine System<br>Neoplasm, Malignant:Thyroid<br>Other: Endocrine Disorders, Electrolyte Disorders, Nutritional and Metabolic Disorders<br>Anomaly: Adrenal Hyperplasia | Insulins<br>biguanides<br>sulfonylureas<br>vasopressin<br>thyroid replacement<br>antithyroid agents | 2005-2009: Visits prescribed due to the presence of diabetes mellitus<br>Beginning in 2010, the following ICD-9-CM codes were in the record: 240-278 |                  |

| Body System or Etiology Group | Hospital Discharge data                                                                                                                                                                                                                                                                                                                                                                                                                                                                                                                                                                                                                                        | Outpatient pharmacy data                                                                                   | Home health care                                                                                    | Specialty visits |
|-------------------------------|----------------------------------------------------------------------------------------------------------------------------------------------------------------------------------------------------------------------------------------------------------------------------------------------------------------------------------------------------------------------------------------------------------------------------------------------------------------------------------------------------------------------------------------------------------------------------------------------------------------------------------------------------------------|------------------------------------------------------------------------------------------------------------|-----------------------------------------------------------------------------------------------------|------------------|
| <b>Ear, Nose, Throat</b>      | Diseases of Salivary Gland, Incl. Parotitis or Benign Tumors, Other Disorders of Oral Cavity (stage 2), Cholesteatoma, Meniere's Disease, Otitis Media, Sinusitis<br>Hearing Loss due to: Acoustic Trauma, Otosclerosis<br>Neoplasm, Benign: Larynx, Sinuses, Oral Cavity and Pharyngeal Structures<br>Pharyngitis: Non-Streptococcal (stage 2)                                                                                                                                                                                                                                                                                                                |                                                                                                            |                                                                                                     |                  |
| <b>Eye</b>                    | Cataract, Conjunctivitis: Bacterial, Contusion or Ruptured Globe, Dacryostenosis or Dacryocystitis, Detachment of the Retina, Ectropion or Entropion (Abnormal Lower Lid Position), Endophthalmitis, Foreign Body: Orbit, Fracture: Orbit, Blow-Out, Fungal Infection of the Eye, Glaucoma, Hypovitaminosis A, Laceration: Cornea, Macular Degeneration, Orbital Infection, Prematurity: Retinopathy, Ptosis of Upper Lid, Retrobulbar Orbital Hemorrhage, Trachoma, Other Eye Disorders<br>Injury or Laceration: Eyelid, Periocular, Cornea, Conjunctiv<br>Injury: Eyes, Nonionizing Radiation<br>Keratitis: Acanthamoeba, Bacterial<br>Neoplasm, Benign: Eye | Sympaticomimetic agents<br>parasympaticomimetic agents<br>anhydrase inhibitors<br>ophthalmic beta blockers |                                                                                                     |                  |
| <b>Gastrointestinal</b>       | Anorectal Suppuration, Celiac Disease, Clostridium difficile Colitis, Crohn's Disease, Diverticular Disease, Food Poisoning: Other Organisms (stage 3), Functional Digestive Disorders, Gastritis, Hemorrhoids, Hernia (External), Hernia (Hiatal or Reflux Esophagitis), Intussusception (stage 2), Irritable Bowel Syndrome, Gastroenteritis                                                                                                                                                                                                                                                                                                                 | Intestinal corticosteroids agents<br>H2 antagonists<br>prostaglandins<br>proton pump inhibitors            | 2005-2009: Visits prescribed due to the presence of Gastrointestinal Diseases<br>Beginning in 2010, |                  |

A-4

1  
2  
3  
4  
5  
6  
7  
8  
9  
10  
11  
12  
13  
14  
15  
16  
17  
18  
19  
20  
21  
22  
23  
24  
25  
26  
27  
28  
29  
30  
31  
32  
33  
34  
35  
36  
37  
38  
39  
40  
41  
42  
43  
44  
45  
46  
47  
48  
49

| Body System or Etiology Group | Hospital Discharge data                                                                                                                                                                                                                                                                                                                                                                                                                                                                                                                                                                                                       | Outpatient pharmacy data                      | Home health care                                                                                                                                                                                 | Specialty visits               |
|-------------------------------|-------------------------------------------------------------------------------------------------------------------------------------------------------------------------------------------------------------------------------------------------------------------------------------------------------------------------------------------------------------------------------------------------------------------------------------------------------------------------------------------------------------------------------------------------------------------------------------------------------------------------------|-----------------------------------------------|--------------------------------------------------------------------------------------------------------------------------------------------------------------------------------------------------|--------------------------------|
|                               | Neoplasm, Benign: Adenomatous Polyps, Colon, Small Bowel, Other Gastrointestinal System<br>Peptic Ulcer Disease, Salmonellosis (stage 3), Ulcerative Colitis, Vascular Insufficiency of the Bowels, Complications of Gastrointestinal Treatment, Gastroenteritis (stage 2/3)<br>Other Diseases of Esophagus, Stomach, and Duodenum<br>Other Gastrointestinal Disorders, Other Gastrointestinal Infections (stage 2), Other Gastrointestinal or Abdominal Symptoms<br>Anomaly: Congenital Megacolon, Other Digestive or Hepatobiliary System<br>Burns, Chemical: Esophagus, Stomach, or Small Intestine, Laceration: Esophagus |                                               | the following ICD-9-CM codes were in the record: 520-539,550-579                                                                                                                                 |                                |
| <b>Genitourinary</b>          | Bladder Disorders, Calculus of the Urinary Tract, Glomerulonephritis, Acute, Injury: Urinary Tract, Nephrotic Syndrome (stage 2/3), Renal Failure (stage 2/3), Urethritis, Urinary Tract Infections, Neoplasm, Benign: Urinary Tract, Other Disorders of Kidney or Ureter, Other Urinary Symptoms, Encounter for Dialysis, Anomaly: Defects of Kidney, Defects of Lower Genitourinary Tract, Syphilis: Congenital                                                                                                                                                                                                             | Agents for hyperkalemia and hyperphosphatemia | 2005-2009: Visits prescribed due to the presence of renal failure and Other diseases of the genito-urinary system<br>Beginning in 2010, the following ICD-9-CM codes were in the record: 580-629 | Visits prescribed for dialysis |

| Body System or Etiology Group       | Hospital Discharge data                                                                                                                                                                                                                                                                                                                                                                      | Outpatient pharmacy data                                            | Home health care                                                                                                              | Specialty visits |
|-------------------------------------|----------------------------------------------------------------------------------------------------------------------------------------------------------------------------------------------------------------------------------------------------------------------------------------------------------------------------------------------------------------------------------------------|---------------------------------------------------------------------|-------------------------------------------------------------------------------------------------------------------------------|------------------|
| <b>Gynecological and Obstetrics</b> | Anomaly: External Female Genitalia, Anomaly: Uterus, Dysfunctional Uterine Bleeding, Endometriosis, Neoplasm, Benign: Ovary (stage 2), Pelvic Inflammatory Disease, Uterine Infection, Uterovaginal Prolapse, Vulvovaginitis, Other Disorders of Female Genital System                                                                                                                       |                                                                     |                                                                                                                               |                  |
| <b>Hematological</b>                | Agranulocytosis, Anemia: Aplastic, Acquired (stage 2/3), Folic Acid Deficiency, Hemolytic (stage 2/3), Iron Deficiency, Sickle Cell, Thalassemia, Vitamin B-12 Deficiency, Other Graft versus Host reaction, Hemophilia A or B, Polycythemia Vera, Other Disorders of Blood and Blood-Forming Organs                                                                                         | Iron<br>vitamin B12<br>folic acids                                  | Beginning in 2010, the following ICD-9-CM codes were in the record: 280-289                                                   |                  |
| <b>Hepatobiliary</b>                | Cholecystitis and Cholelithiasis, Cirrhosis of the Liver (stage 2/3), Disorders of Bilirubin Excretion, Hepatitis A, Hepatitis B, Hepatitis C, Hepatitis D, Hepatitis E, Hepatitis G, Hepatitis (Chemical), Pancreatitis, Wilson's Disease, Neoplasm, Benign: Hepatobiliary System, Other Hepatobiliary and Pancreatic Disorders, Other Hepatobiliary Infections, Other Pancreatic Disorders | Interferons<br>blood substitutes and<br>plasmatic protein fractions |                                                                                                                               |                  |
| <b>Immunologic Diseases</b>         | Human Immunodeficiency Virus Type I (HIV) Infection, Other Immunodeficient Disorders, Pneumonia: Pneumocystis carinii                                                                                                                                                                                                                                                                        | Nucleosides and nucleotides<br>reverse transcriptase inhibitors     | 2005-2009: Visits prescribed due to HIV Infections<br>Beginning in 2010, the following ICD-9-CM codes were in the record: 279 |                  |

1  
2  
3  
4  
5  
6  
7  
8  
9  
10  
11  
12  
13  
14  
15  
16  
17  
18  
19  
20  
21  
22  
23  
24  
25  
26  
27  
28  
29  
30  
31  
32  
33  
34  
35  
36  
37  
38  
39  
40  
41  
42  
43  
44  
45  
46  
47  
48  
49

| Body System or Etiology Group | Hospital Discharge data                                                                                                                                                                                                                                                                                                                                                                                                                                                                                                                                                                                                                                                                                              | Outpatient pharmacy data                                                                                                              | Home health care                                                                                                                                                                        | Specialty visits |
|-------------------------------|----------------------------------------------------------------------------------------------------------------------------------------------------------------------------------------------------------------------------------------------------------------------------------------------------------------------------------------------------------------------------------------------------------------------------------------------------------------------------------------------------------------------------------------------------------------------------------------------------------------------------------------------------------------------------------------------------------------------|---------------------------------------------------------------------------------------------------------------------------------------|-----------------------------------------------------------------------------------------------------------------------------------------------------------------------------------------|------------------|
| <b>Infectious Diseases</b>    | Aspergillosis, Chlamydial Infection Except Trachoma or Pneumonia, Cryptococcosis, Cytomegalovirus Disease (Acquired), Infectious Mononucleosis (stage 2), Mucormycosis, Reye's Syndrome (stage 3), Rubella: Acquired (stage 3), Schistosomiasis, Other Bacterial Infections, Other Fungal Infections, Other Infectious and Parasitic Infections, Other Viral Infections, Cytomegalovirus Disease (Congenital), Parainfluenza Virus Infection, Pneumonia: Chlamydial, Sarcoidosis, Other Respiratory Infections, Scabies                                                                                                                                                                                              |                                                                                                                                       | Beginning in 2010, the following ICD-9-CM codes were in the record: 001-139                                                                                                             |                  |
| <b>Male Genital</b>           | Benign Prostatic Hypertrophy, Gonorrhea: Male, Prostatitis                                                                                                                                                                                                                                                                                                                                                                                                                                                                                                                                                                                                                                                           | Alfa-adrenoreceptor antagonists<br>testosterone 5-alfa reductase inhibitors                                                           |                                                                                                                                                                                         |                  |
| <b>Musculoskeletal</b>        | Vitamin D Deficiency, Dislocation: Knee, Eosinophilia Myalgia Syndrome, Fracture: Acetabulum, Fracture: Calcaneus (stage 2), Fracture: Femur, Except Head or Neck, Fracture: Femur, Head or Neck, Fracture: Fibula (stage 2), Fracture: Humerus (Shaft), Fracture: Humerus (Supracondylar) (stage 2), Fracture: Radial Shaft, Ulna or Olecranon (stage 2), Fracture: Radius, Lower End (stage 2), Fracture: Tibia (stage 2/3), Fracture or Dislocation: Patella (stage 2), Fracture or Sprain: Ankle (stage 2), Fracture, Dislocation, or Sprain: Facial Bones (stage 2/3), Fracture, Dislocation, or Sprain: Foot (stage 2), Fracture, Dislocation, or Sprain: Hip or Pelvis (stage 2/3), Fracture, Dislocation, or | Colchicine<br>uric acid inhibitors<br>antiinflammatory non-steroids<br>gold salts<br>aminoquinolines<br>bisphosphonates<br>calcitonin | 2005-2009: Visits prescribed due to the presence of Arthrosis, Arthritis and other osteo-muscular and connective diseases, and Fractures of femurs and other consequences of fractures. |                  |

| Body System or Etiology Group | Hospital Discharge data                                                                                                                                                                                                                                                                                                                                                                                                                                                                                                                                                                                                                                                                                                                                                                                                                                                                                                                                                                                                                                                                                      | Outpatient pharmacy data                                                                                                                   | Home health care                                                                                       | Specialty visits |
|-------------------------------|--------------------------------------------------------------------------------------------------------------------------------------------------------------------------------------------------------------------------------------------------------------------------------------------------------------------------------------------------------------------------------------------------------------------------------------------------------------------------------------------------------------------------------------------------------------------------------------------------------------------------------------------------------------------------------------------------------------------------------------------------------------------------------------------------------------------------------------------------------------------------------------------------------------------------------------------------------------------------------------------------------------------------------------------------------------------------------------------------------------|--------------------------------------------------------------------------------------------------------------------------------------------|--------------------------------------------------------------------------------------------------------|------------------|
|                               | Sprain: Humerus (Head) or Shoulder (stage 2), Fracture, Dislocation, or Sprain: Wrist or Hand or Fingers (stage 2), Gout, Herniated Intervertebral Disc, Infectious Arthritis (stage 2/3), Injury, Chest Wall, Injury, Knee, Semilunar Cartilages (stage 2), Injury, Open Wound, or Blunt Trauma: Lower Extremity (stage 2), Injury, Open Wound, or Blunt Trauma: Upper Extremity (stage 2/3), Muscular Dystrophy, Osteoarthritis, Osteochondrodysplasia, Osteomalacia, Osteomyelitis (stage 2/3), Osteoporosis, Progressive Systemic Sclerosis, Rheumatoid Arthritis, Scoliosis of the Thoracic Spine, Spondylitis, Ankylosing, Systemic Lupus Erythematosus, Anomaly: Musculoskeletal System, Injury: Other and Ill-Defined Musculoskeletal Sites, Neoplasm, Benign: Musculoskeletal Syst. or Connective Tissue, Other Arthropathies, Bone and Joint Disorders, Other Disorders of Connective Tissue, Other Spinal and Back Disorders, Myasthenia Gravis, Complications of Surgical and Medical Care (stage 1), Injury, Open Wound, or Blunt Trauma: Abdomen or Trunk (stage 2/3), Injury: Other (stage 3) |                                                                                                                                            | Beginning in 2010, the following ICD-9-CM codes were in the record: 710-739                            |                  |
| <b>Neurologic Diseases</b>    | Down's Syndrome, Herpes zoster, Poliomyelitis, Post-Polio Syndrome, Syphilis: Acquired, Tetanus (stage 1), Toxoplasmosis: Acquired (stage 3), Amyotrophic Lateral Sclerosis, Cerebral Palsy, Cerebrovascular Disease, Disease of Nervous System Secondary to Implants or Grafts, Epilepsy, Guillain-Barre Syndrome (stage 2), Headache (stage 2), Huntington's Chorea, Injury: Craniocerebral,                                                                                                                                                                                                                                                                                                                                                                                                                                                                                                                                                                                                                                                                                                               | Anticholinesterase agents<br>anticonvulsivant<br>barbiturates and congeners<br>alprostadil<br>ergot alkaloids<br>5HT1 agonists<br>dopamine | 2005-2009: Visits prescribed due to the presence of Dementia and Alzheimer's syndrome, Parkinson's and |                  |

1  
2  
3  
4  
5  
6  
7  
8  
9  
10  
11  
12  
13  
14  
15  
16  
17  
18  
19  
20  
21  
22  
23  
24  
25  
26  
27  
28  
29  
30  
31  
32  
33  
34  
35  
36  
37  
38  
39  
40  
41  
42  
43  
44  
45  
46  
47  
48  
49

| Body System or Etiology Group | Hospital Discharge data                                                                                                                                                                                                                                                                                                                                                                                                                                                                                    | Outpatient pharmacy data                 | Home health care                                                                                                                                                                                                         | Specialty visits |
|-------------------------------|------------------------------------------------------------------------------------------------------------------------------------------------------------------------------------------------------------------------------------------------------------------------------------------------------------------------------------------------------------------------------------------------------------------------------------------------------------------------------------------------------------|------------------------------------------|--------------------------------------------------------------------------------------------------------------------------------------------------------------------------------------------------------------------------|------------------|
|                               | Injury: Spine and spinal cord, Meningitis, Encephalitis, and Myelitis: Viral, Meningitis: Bacterial, Mental Retardation, Multiple Sclerosis, Neurofibromatosis Type I [Von Recklinghausen's Disease], Parkinson's Disease, Other CNS Inflammation, Infection, or Disorder, Other Cranial Nerve Disorders, Other Neurological Conditions, Other Peripheral Nerve Disorders, Other Spinal Lesions, Anomaly: Neural Tube Defects, Rubella: Congenital (stage 2), Anomaly: Other Nervous System, Injury: Other | MAO b inhibitors                         | other CNS degenerative disease, hemiplegia, monoplegia, and other associated syndroms, and acute and chronic cerebrovascular diseases<br>Beginning in 2010, the following ICD-9-CM codes were in the record: 320-389,797 |                  |
| <b>Psychological</b>          | Dementia: Primary Degenerative (Alzheimer's or Pick's), Antisocial Personality Disorder, Bipolar Disorder - Major Depressive Episode, Bipolar Disorder - Manic Episode, Depression, Generalized Anxiety Disorder, Obsessive-Compulsive Neurosis, Schizophrenia, Autism, Other Neuroses, Other Psychoses<br>Drug Abuse, Dependence, Intoxication: Alcohol, Amphetamine, Barbiturate, Cannabis, Cocaine, Hallucinogen, Opioid, Other<br>Eating disorders: Anorexia Nervosa, Bulimia Nervosa                  | Antidepressants<br>antipsychotics agents | 2005-2009: Visits prescribed due to the presence of psychoses, neuroses, and mental retardation<br>Beginning in 2010, the following ICD-9-CM codes were in the record: 290-319                                           |                  |



| Body System or Etiology Group | Hospital Discharge data                                                                                                                                                                                                                                                                                                                                                                                                                                                                                                                                                                                                                                                                                                                | Outpatient pharmacy data                                                                                                                                                                         | Home health care                                                                                                                                                            | Specialty visits |
|-------------------------------|----------------------------------------------------------------------------------------------------------------------------------------------------------------------------------------------------------------------------------------------------------------------------------------------------------------------------------------------------------------------------------------------------------------------------------------------------------------------------------------------------------------------------------------------------------------------------------------------------------------------------------------------------------------------------------------------------------------------------------------|--------------------------------------------------------------------------------------------------------------------------------------------------------------------------------------------------|-----------------------------------------------------------------------------------------------------------------------------------------------------------------------------|------------------|
| <b>Respiratory</b>            | Coxsackie and ECHO Infections (stage 2/3), Anomaly: Tracheoesophageal Malformations, Asbestosis, Asthma, Berylliosis, Byssinosis, Chronic Obstructive Pulmonary Disease, Coal Miner's Pneumoconiosis, Croup, Cystic Fibrosis, Emphysema, Hypersensitivity Pneumonitis, Influenza, Mycoplasma pneumoniae Infection, Parainfluenza Virus Infection (stage 2), Pneumonia: Bacterial, Pneumonia: Legionella, Pulmonary Alveolar Proteinosis, Pulmonary Embolism (stage 3), Radiation Pneumonitis, Silicosis, Tuberculosis, Complications of Tracheostomy, Other Disorders of Respiratory System, Other Respiratory Disease Due to External Agents, Other Respiratory Symptoms, Pneumonia: Aspiration, Neoplasm, Benign: Respiratory System | Inhaled corticosteroids<br>beta-2-adrenoreceptor agonists<br>xanthines<br>leucotrienies antagonists<br>cromolyn<br>pancreatic enzymes<br>mucolytics<br>antituberculosis antibiotics<br>isoniazid | 2005-2009: Visits prescribed due to the presence of respiratory diseases<br>Beginning in 2010, the following ICD-9-CM codes were in the record: 460-519                     |                  |
| <b>Skin</b>                   | Herpes Virus Ocular Infection (stage 1), Urticaria, Candida (Monial) Infections, Clostridial Wound Infection (stage 2), Herpes Simplex Infections, Complications of Surgical and Medical Care (stage 2/3), Anomaly: Integument (Genodermatoses), Decubitus Ulcers, Erythema Multiforme, Erythroderma, Immunologically Mediated Blistering Skin Diseases, Infections of Skin and Subcutaneous Tissue, Neoplasm, Malignant: Carcinoma, Basal Cell (stage 1), Neoplasm: Atypical Nevus (stage 1), Psoriasis Vulgaris, Other Inflammations & Infections of Skin & SubQ Tissue, Burns, Neoplasm, Benign: Skin or Subcutaneous Tissue (stage 1)                                                                                              | Oral and topical antipsoriasis agents                                                                                                                                                            | 2005-2009: Visits prescribed due to the presence of decubitus ulcers and other skin diseases<br>Beginning in 2010, the following ICD-9-CM codes were in the record: 680-709 |                  |

A-10

1  
2  
3  
4  
5  
6  
7  
8  
9  
10  
11  
12  
13  
14  
15  
16  
17  
18  
19  
20  
21  
22  
23  
24  
25  
26  
27  
28  
29  
30  
31  
32  
33  
34  
35  
36  
37  
38  
39  
40  
41  
42  
43  
44  
45  
46  
47  
48  
49

For peer review only

A-11

## Appendix: Regression coefficients and significance levels

## Females 18-34

| Variable                                                           | Coefficient | p-value |
|--------------------------------------------------------------------|-------------|---------|
| Intercept                                                          | -5.0771     | <.0001  |
| Number of Chronic Conditions (from any data source = 1)            | 0.4347      | <.0001  |
| Number of Chronic Conditions (from any data source = 2)            | 0.8614      | <.0001  |
| Number of Chronic Conditions (from any data source = 3)            | 1.1305      | <.0001  |
| Number of Chronic Conditions (from any data source = 4 or more)    | 1.7194      | <.0001  |
| Number of Chronic Conditions (from hospital data = 1)              | 0.9074      | <.0001  |
| Number of Chronic Conditions (from hospital data = 2 or more)      | 0.8834      | <.0001  |
| Total number of ER visits                                          | 0.2634      | <.0001  |
| History of Obesity-Stage 2 or 3 *                                  | 1.6342      | <.0001  |
| History of polypharmacy *                                          | 0.5968      | <.0001  |
| History of Drug Abuse, Dependence, Intoxication: Alcohol-Stage 1 * | 2.1087      | <.0001  |

## Males 18-34

| Variable                                                                | Coefficient | p-value |
|-------------------------------------------------------------------------|-------------|---------|
| Intercept                                                               | -5.2835     | <.0001  |
| Number of Chronic Conditions (from any data source) = 1                 | 0.6534      | <.0001  |
| Number of Chronic Conditions (from any data source) = 2                 | 1.2390      | <.0001  |
| Number of Chronic Conditions (from any data source) = 3                 | 1.5240      | <.0001  |
| Number of Chronic Conditions (from any data source) = 4 or more         | 2.0556      | <.0001  |
| Neurologic Diseases (from home health prescription)                     | 1.6802      | <.0001  |
| Renal Failure-Stage 2 or 3                                              | 1.3802      | <.0001  |
| Any Gastrointestinal Disease - Stage 2 (from hospital data)             | 1.1512      | <.0001  |
| Any Neurologic Disease - Stage 3 (from hospital data)                   | 0.8614      | <.0001  |
| Any Psychologic Disease - Stage 2 (from hospital data)                  | 1.0198      | <.0001  |
| Any Respiratory Disease - Stage 2 (from hospital data)                  | 0.9451      | <.0001  |
| Anti-arrhythmics                                                        | 1.5415      | <.0001  |
| Total number of ER visits                                               | 0.2371      | <.0001  |
| History of Neurologic Diseases (from drug prescriptions) *              | 0.4880      | <.0001  |
| History of Crohns Disease-Stage 2 or 3 *                                | 1.4684      | 0.0004  |
| History of Neoplasm, Malignant: Colon and Rectum-Stage 2 *              | 2.9037      | 0.0063  |
| History of Calculus of the Urinary Tract-Stage 1 *                      | 1.0806      | <.0001  |
| History of Cirrhosis of the Liver-Stage 2 or 3 *                        | 1.2212      | <.0001  |
| History of Pancreatitis-any stage *                                     | 1.7777      | <.0001  |
| History of Cerebrovascular Disease-Stage 2 *                            | 2.0588      | 0.0004  |
| History of Obesity-Stage 2 or 3 *                                       | 1.6569      | <.0001  |
| History of polypharmacy *                                               | 0.4747      | <.0001  |
| History of Drug Abuse, Dependence, Intoxication: Alcohol-Stage 2 or 3 * | 1.6103      | <.0001  |

Hospitalization 0.6338 <.0001

### Females 35-44

| Variable                                                               | Coefficient | p-value |
|------------------------------------------------------------------------|-------------|---------|
| Intercept                                                              | -4.9905     | <.0001  |
| Number of Chronic Conditions (from any data source) = 1                | 0.5265      | <.0001  |
| Number of Chronic Conditions (from any data source) = 2                | 0.8446      | <.0001  |
| Number of Chronic Conditions (from any data source) = 3                | 0.8519      | <.0001  |
| Number of Chronic Conditions (from any data source) = 4 or more        | 0.6525      | 0.0155  |
| Number of Chronic Conditions (from any data source) = 5 or more        | 0.5419      | 0.0934  |
| Number of Chronic Conditions (from hospital data) = 1                  | 0.8319      | <.0001  |
| Number of Chronic Conditions (from hospital data) = 2                  | 1.0387      | <.0001  |
| Number of Chronic Conditions (from hospital data) = 3 or more          | 1.3840      | <.0001  |
| Number of Chronic Conditions (from home health prescription)=1 or more | 0.5128      | 0.0390  |
| Number of Chronic Conditions (from drug prescriptions)=1               | -0.0948     | 0.3171  |
| Number of Chronic Conditions (from drug prescriptions)=2               | 0.0670      | 0.6542  |
| Number of Chronic Conditions (from drug prescriptions)=3 or more       | 0.2362      | 0.2746  |
| Reside in Mountain area on 12/ 31/ 2012                                | 0.1865      | 0.0196  |
| Reside in Hill area on 12/ 31/ 2012                                    | -0.0128     | 0.7341  |
| Cardiovascular Disease (from home health prescription)                 | 1.7641      | 0.0006  |
| Endocrine Disease (from home health prescription)                      | 1.5904      | 0.0930  |
| Infectious Disease (from home health prescription)                     | 1.6836      | 0.0468  |
| Genitourinary (dialysis)                                               | 0.7208      | 0.0081  |
| Aortic Stenosis-Stage 1                                                | 2.2652      | 0.0004  |
| Arrhythmias-Stage 2                                                    | 1.0050      | 0.0016  |
| Neoplasm, Malignant: Stomach-Stage 3                                   | 1.8592      | 0.0204  |
| Neoplasm, Malignant: Breast, Female-Stage 3                            | 0.7628      | 0.0204  |
| Progressive Systemic Sclerosis-Stage 1                                 | 0.9852      | 0.0321  |
| Progressive Systemic Sclerosis-Stage 2 or 3                            | 1.6206      | 0.0087  |
| Obesity-Stage 2 or 3                                                   | 0.4604      | 0.0039  |
| Drug Abuse, Dependence, Intoxication: Alcohol-Stage 1                  | 0.6965      | 0.0223  |
| Drug Abuse, Dependence, Intoxication: Alcohol-Stage 2 or 3             | 0.7457      | 0.0325  |
| Neoplasm, Malignant: Lungs, Bronchi, or Mediastinum-Stage 3            | 1.6501      | 0.0187  |
| Any Cancer - Stage 3 (from hospital data)                              | 1.2094      | <.0001  |
| Any Cardiovascular Disease - Stage 1 (from hospital data)              | -0.5051     | 0.0014  |
| Any Gastrointestinal Disease - Stage 2 (from hospital data)            | 0.4724      | 0.0065  |
| Any Genitourinary Disease - Stage 2 (from hospital data)               | 0.3895      | 0.0581  |
| Any Gynecologic Disease - Stage 1 (from hospital data)                 | -0.5549     | <.0001  |
| Any Hepatobiliary Disease - Stage 1 (from hospital data)               | -0.5393     | 0.0029  |
| Any Musculoskeletal Disease - Stage 1 (from hospital data)             | -0.4858     | 0.0002  |

|    |                                                                          |         |        |
|----|--------------------------------------------------------------------------|---------|--------|
| 1  |                                                                          |         |        |
| 2  |                                                                          |         |        |
| 3  | Any Neurologic Disease - Stage 3 (from hospital data)                    | 0.8922  | <.0001 |
| 4  | Any Psychologic Disease - Stage 2 (from hospital data)                   | 0.5166  | 0.0038 |
| 5  | Any Respiratory Disease - Stage 2 (from hospital data)                   | 0.5162  | 0.0436 |
| 6  | Endocrine Disease (from drug prescriptions)                              | -0.4482 | <.0001 |
| 7  | Genitourinary Disease (from drug prescriptions)                          | 0.9552  | 0.0001 |
| 8  | Respiratory Disease (from drug prescriptions)                            | -0.2258 | 0.0107 |
| 9  | Cardiovascular Disease (from any data source)                            | -0.2700 | 0.0118 |
| 10 | Day hospitalization                                                      | -0.2627 | 0.0004 |
| 11 | ACE/ARB                                                                  | 0.2465  | 0.0266 |
| 12 | Digitalis glycosides                                                     | 0.9678  | 0.0285 |
| 13 | Number of ER visits labeled 'Yellow'                                     | -0.2515 | 0.0378 |
| 14 | Total number of ER visits                                                | 0.4548  | 0.0001 |
| 15 | Eye Disease (from any data source)                                       | -0.5158 | 0.0174 |
| 16 | History of Cancer (from drug prescriptions) *                            | 0.2289  | 0.0247 |
| 17 | History of Endocrine Disease (from drug prescriptions) *                 | 0.1529  | 0.0624 |
| 18 | History of Psychological Disease (from drug prescriptions) *             | 0.2272  | <.0001 |
| 19 | History of Arrhythmias-Stage 2 *                                         | 0.4871  | 0.0794 |
| 20 | History of Cardiomyopathies-Stage 3 *                                    | 1.1771  | 0.0262 |
| 21 | History of Thrombophlebitis-Stage 2 or 3 *                               | 0.9344  | 0.0030 |
| 22 | History of Diabetes Mellitus Type 1 or Type 2-Stage 2 *                  | 1.1944  | <.0001 |
| 23 | History of Crohns Disease-Stage 2 or 3 *                                 | 0.7513  | 0.0377 |
| 24 | History of Neoplasm, Malignant: Colon and Rectum-Stage 3 *               | 2.0723  | <.0001 |
| 25 | History of Calculus of the Urinary Tract-Stage 1 *                       | 0.4914  | 0.0146 |
| 26 | History of Calculus of the Urinary Tract-Stage 2 or 3 *                  | 0.8776  | 0.0003 |
| 27 | History of Neoplasm, Malignant: Kidneys-Stage 1 *                        | 1.3977  | 0.0102 |
| 28 | History of Neoplasm, Malignant: Kidneys-Stage 3 *                        | 3.2491  | 0.0100 |
| 29 | History of Pancreatitis-any stage *                                      | 0.8084  | 0.0199 |
| 30 | History of Cerebrovascular Disease-Stage 1 *                             | 0.8172  | 0.0057 |
| 31 | History of Cerebrovascular Disease-Stage 2 *                             | 1.1315  | 0.0013 |
| 32 | History of Obesity-Stage 2 or 3 *                                        | 1.2321  | <.0001 |
| 33 | History of polypharmacy *                                                | 0.3345  | <.0001 |
| 34 | History of Bipolar Disorder - Major Depressive Episode-Stage 2 or 3 *    | 0.6431  | 0.0246 |
| 35 | History of Bipolar Disorder - Manic Episode-Stage 2 *                    | 0.8255  | <.0001 |
| 36 | History of Depression-Stage 1 or 2 *                                     | 0.2207  | 0.0716 |
| 37 | History of Drug Abuse, Dependence, Intoxication: Alcohol-Stage 1 *       | 0.5358  | 0.0330 |
| 38 | History of Chronic Obstructive Pulmonary Disease-Stage 1 or 2 *          | 0.9824  | 0.0003 |
| 39 | History of Chronic Obstructive Pulmonary Disease-Stage 3 *               | 1.8886  | 0.0964 |
| 40 | History of Neoplasm, Malignant: Lungs, Bronchi, or Mediastinum-Stage 1 * | 1.6543  | 0.0122 |
| 41 | History of Pneumonia: Bacterial-Stage 3 *                                | 1.3040  | 0.0015 |
| 42 | Immunologic Disease (from any data source)                               | 0.8590  | 0.0001 |
| 43 | Polypharmacy                                                             | 0.2838  | <.0001 |
| 44 | Number of the other 9 Cardiovascular drugs                               | 0.1330  | 0.0036 |
| 45 |                                                                          |         |        |
| 46 |                                                                          |         |        |
| 47 |                                                                          |         |        |
| 48 |                                                                          |         |        |
| 49 |                                                                          |         |        |
| 50 |                                                                          |         |        |
| 51 |                                                                          |         |        |
| 52 |                                                                          |         |        |
| 53 |                                                                          |         |        |
| 54 |                                                                          |         |        |
| 55 |                                                                          |         |        |
| 56 |                                                                          |         |        |
| 57 |                                                                          |         |        |
| 58 |                                                                          |         |        |
| 59 |                                                                          |         |        |
| 60 |                                                                          |         |        |

## Males 35-44

| Variable                                                      | Coefficient | p-value |
|---------------------------------------------------------------|-------------|---------|
| Intercept                                                     | -4.8083     | <.0001  |
| Number of Chronic Conditions (from any data source)=1         | 0.5439      | <.0001  |
| Number of Chronic Conditions (from any data source)=2         | 0.7994      | <.0001  |
| Number of Chronic Conditions (from any data source)=3         | 0.7949      | <.0001  |
| Number of Chronic Conditions (from any data source)=4         | 1.1832      | <.0001  |
| Number of Chronic Conditions (from any data source)=5 or more | 0.9615      | <.0001  |
| Age on 12/ 31/ 2012                                           | -0.00005    | 0.0031  |
| Cancer (from home health prescription)                        | 1.6698      | 0.0023  |
| Blood Diseases (from home health prescription)                | 2.7427      | 0.0385  |
| Infectious Disease (from home health prescription)            | 3.1524      | 0.0129  |
| Neurologic Diseases (from home health prescription)           | 2.0454      | <.0001  |
| Genitourinary (dialysis)                                      | 1.0696      | <.0001  |
| Cardiomyopathies-Stage 3                                      | 1.7220      | 0.0016  |
| Infective Endocarditis-Stage 3                                | 3.7783      | 0.0015  |
| Mitral Stenosis-Stage 3                                       | 3.0377      | 0.0345  |
| Pericarditis: Chronic-Stage 2 or 3                            | 1.2938      | 0.0240  |
| Crohns Disease-Stage 1                                        | 1.6408      | <.0001  |
| Neoplasm, Malignant: Colon and Rectum-Stage 2                 | 1.4659      | 0.0030  |
| Cirrhosis of the Liver-Stage 2 or 3                           | 0.6646      | 0.0066  |
| Neoplasm, Malignant: Pancreas-Stage 1                         | 2.4864      | 0.0143  |
| Pancreatitis-all stages                                       | 0.8241      | 0.0053  |
| Cerebrovascular Disease-Stage 3                               | 0.9540      | <.0001  |
| Epilepsy-all stages                                           | 0.5515      | 0.0247  |
| Drug Abuse, Dependence, Intoxication: Alcohol-Stage 1         | 0.6065      | 0.0050  |
| Any Cancer - Stage 3 (from hospital data)                     | 1.7602      | <.0001  |
| Any Endocrine Disease - Stage 1 (from hospital data)          | -0.5267     | 0.0028  |
| Any Endocrine - Stage 2 (from hospital data)                  | 0.5688      | 0.0028  |
| Any Gastrointestinal Disease - Stage 1 (from hospital data)   | -1.5927     | <.0001  |
| Any Immunologic Disease - All stages (from hospital data)     | 0.6498      | 0.0068  |
| Any Psychologic Disease - Stage 2 (from hospital data)        | 0.7963      | <.0001  |
| Any Psychologic Disease - Stage 3 (from hospital data)        | 1.4603      | 0.0014  |
| Endocrine Disease (from drug prescriptions)                   | 0.2204      | 0.0058  |
| Number of day hospitalizations                                | 0.2078      | 0.0003  |
| Oral anti-coagulants                                          | 0.4822      | 0.0028  |
| Anti-arrhythmics                                              | 0.7069      | 0.0027  |
| Total number of ER visits                                     | 0.2455      | <.0001  |
| Eye Disease (from any data source)                            | -0.4757     | 0.0200  |
| History of Neurological Disease (from drug prescriptions) *   | 0.3728      | <.0001  |
| History of Psychological Disease (from drug prescriptions) *  | 0.2678      | <.0001  |
| History of Arrhythmias-Stage 2 *                              | 0.7259      | 0.0008  |
| History of Cardiomyopathies-Stage 2 *                         | 0.8655      | 0.0009  |

\*History variables are calculated on previous 5 years of exposure data  
 For peer review only - <http://bmjopen.bmj.com/site/about/guidelines.xhtml>

|    |                                                                         |         |        |
|----|-------------------------------------------------------------------------|---------|--------|
| 1  |                                                                         |         |        |
| 2  |                                                                         |         |        |
| 3  | History of Essential Hypertension-Stage 3 *                             | 0.8004  | 0.0062 |
| 4  | History of Pericarditis: Viral or Traumatic-Stage 2 or 3 *              | 1.0253  | 0.0008 |
| 5  | History of Diabetes Mellitus Type 1 or Type 2-Stage 2 *                 | 0.7425  | 0.0034 |
| 6  | History of Diabetes Mellitus Type 1 or Type 2-Stage 3 *                 | 0.7380  | 0.0071 |
| 7  | History of Crohns Disease-Stage 2 or 3 *                                | 1.3269  | <.0001 |
| 8  | History of Calculus of the Urinary Tract-Stage 1 *                      | 0.7919  | <.0001 |
| 9  | History of Renal Failure-Stage 2 or 3 *                                 | 0.5494  | 0.0107 |
| 10 | History of Cholecystitis and Cholelithiasis-Stage 3 *                   | 1.4633  | 0.0012 |
| 11 | History of Cirrhosis of the Liver-Stage 2 or 3 *                        | 0.5857  | 0.0009 |
| 12 | History of Pancreatitis-any stage *                                     | 1.2530  | <.0001 |
| 13 | History of Progressive Systemic Sclerosis-Stage 2 or 3 *                | 3.8605  | 0.0026 |
| 14 | History of Obesity-Stage 2 or 3 *                                       | 0.8764  | <.0001 |
| 15 | History of Bipolar Disorder - Manic Episode-Stage 2 *                   | 0.8467  | <.0001 |
| 16 | History of Drug Abuse, Dependence, Intoxication: Alcohol-Stage 1 *      | 0.5825  | 0.0005 |
| 17 | History of Drug Abuse, Dependence, Intoxication: Alcohol-Stage 2 or 3 * | 0.7745  | <.0001 |
| 18 | History of Chronic Obstructive Pulmonary Disease-Stage 1 or 2 *         | 0.7316  | 0.0018 |
| 19 | History of Pneumonia: Bacterial-Stage 3 *                               | 1.0518  | 0.0006 |
| 20 | History of Other Cardiovascular drugs *                                 | 0.2342  | 0.0043 |
| 21 | Hospitalization                                                         | 0.7414  | <.0001 |
| 22 | Gastrointestinal Disease (from hospital data)                           | 0.9745  | <.0001 |
| 23 | Respiratory Disease (from hospital data)                                | 0.4067  | 0.0025 |
| 24 | Any of the other 9 Cardiovascular drugs                                 | -0.5914 | <.0001 |
| 25 | Number of the other 9 Cardiovascular drugs                              | 0.2767  | <.0001 |
| 26 |                                                                         |         |        |
| 27 |                                                                         |         |        |
| 28 |                                                                         |         |        |
| 29 |                                                                         |         |        |
| 30 |                                                                         |         |        |
| 31 |                                                                         |         |        |
| 32 |                                                                         |         |        |
| 33 |                                                                         |         |        |
| 34 |                                                                         |         |        |
| 35 |                                                                         |         |        |
| 36 |                                                                         |         |        |
| 37 |                                                                         |         |        |
| 38 |                                                                         |         |        |
| 39 |                                                                         |         |        |
| 40 |                                                                         |         |        |
| 41 |                                                                         |         |        |
| 42 |                                                                         |         |        |
| 43 |                                                                         |         |        |
| 44 |                                                                         |         |        |
| 45 |                                                                         |         |        |
| 46 |                                                                         |         |        |
| 47 |                                                                         |         |        |
| 48 |                                                                         |         |        |
| 49 |                                                                         |         |        |
| 50 |                                                                         |         |        |
| 51 |                                                                         |         |        |
| 52 |                                                                         |         |        |
| 53 |                                                                         |         |        |
| 54 |                                                                         |         |        |
| 55 |                                                                         |         |        |
| 56 |                                                                         |         |        |
| 57 |                                                                         |         |        |
| 58 |                                                                         |         |        |
| 59 |                                                                         |         |        |
| 60 |                                                                         |         |        |

### Females 45-54

| Variable                                                               | Coefficient | p-value |
|------------------------------------------------------------------------|-------------|---------|
| Intercept                                                              | -4.9051     | <.0001  |
| Number of Chronic Conditions (from any data source)=1                  | 0.3066      | <.0001  |
| Number of Chronic Conditions (from any data source)=2                  | 0.4393      | <.0001  |
| Number of Chronic Conditions (from any data source)=3                  | 0.4533      | <.0001  |
| Number of Chronic Conditions (from any data source)=4                  | 0.3924      | 0.0002  |
| Number of Chronic Conditions (from any data source)=5 or more          | 0.3544      | 0.0079  |
| Number of Chronic Conditions (from hospital data)=1                    | 0.4819      | <.0001  |
| Number of Chronic Conditions (from hospital data)=2                    | 0.6828      | <.0001  |
| Number of Chronic Conditions (from hospital data)=3 or more            | 0.8788      | <.0001  |
| Number of Chronic Conditions (from home health prescription)=1 or more | 0.9174      | <.0001  |
| Reside in Mountain area on 12/ 31/ 2012                                | 0.2243      | 0.0008  |
| Reside in Hill area on 12/ 31/ 2012                                    | -0.0104     | 0.7596  |
| Essential Hypertension-Stage 1                                         | -0.3166     | 0.0082  |
| Pericarditis: Chronic-Stage 2 or 3                                     | 2.0018      | 0.0001  |

|    |                                                              |         |        |
|----|--------------------------------------------------------------|---------|--------|
| 1  |                                                              |         |        |
| 2  |                                                              |         |        |
| 3  | Neoplasm, Malignant: Colon and Rectum-Stage 2                | 0.8110  | 0.0074 |
| 4  | Cholecystitis and Cholelithiasis-Stage 2                     | 0.8570  | 0.0043 |
| 5  | Cirrhosis of the Liver-Stage 2 or 3                          | 0.4736  | 0.0176 |
| 6  | Pancreatitis-all stages                                      | 0.8873  | 0.0217 |
| 7  | Progressive Systemic Sclerosis-Stage 2 or 3                  | 0.9823  | 0.0173 |
| 8  | Cerebrovascular Disease-Stage 1                              | 0.5623  | 0.0340 |
| 9  | Cerebrovascular Disease-Stage 3                              | -0.6910 | 0.0224 |
| 10 | Obesity-Stage 2 or 3                                         | 0.4054  | 0.0063 |
| 11 | Neoplasm, Malignant: Lungs, Bronchi, or Mediastinum-Stage 2  | 1.3912  | 0.0132 |
| 12 | Any Cancer - Stage 3 (from hospital data)                    | 1.7066  | <.0001 |
| 13 | Any Ear,Nose,Throat Disease - Stage 1 (from hospital data)   | -0.6186 | 0.0401 |
| 14 | Any Gastrointestinal Disease - Stage 1 (from hospital data)  | -0.4730 | <.0001 |
| 15 | Any Gynecologic Disease - Stage 1 (from hospital data)       | -0.5578 | <.0001 |
| 16 | Any Infectious Disease - Stage 3 (from hospital data)        | -1.8556 | 0.0017 |
| 17 | Any Musculoskeletal Disease - Stage 1 (from hospital data)   | -0.4338 | <.0001 |
| 18 | Any Neurologic Disease - Stage 3 (from hospital data)        | 1.0267  | <.0001 |
| 19 | Any Psychologic Disease - Stage 1 (from hospital data)       | -0.2591 | 0.0256 |
| 20 | Any Psychologic Disease - Stage 2 (from hospital data)       | 0.4123  | 0.0034 |
| 21 | Any Psychologic Disease - Stage 3 (from hospital data)       | 1.3041  | 0.0042 |
| 22 | Any Respiratory Disease - Stage 2 (from hospital data)       | 0.4618  | 0.0149 |
| 23 | Any Respiratory Disease - Stage 3 (from hospital data)       | 0.7372  | 0.0009 |
| 24 | Any Skin Disease - Stage 1 (from hospital data)              | -0.3787 | 0.0245 |
| 25 | Gastrointestinal Disease (from drug prescriptions)           | 0.2535  | <.0001 |
| 26 | Genitourinary Disease (from drug prescriptions)              | 1.1262  | <.0001 |
| 27 | Oral anti-coagulants                                         | 0.3753  | 0.0063 |
| 28 | Anti-arrhythmics                                             | 0.7321  | <.0001 |
| 29 | Digitalis glycosides                                         | 0.9270  | 0.0003 |
| 30 | Total number of ER visits                                    | 0.2068  | <.0001 |
| 31 | History of Cancer (from drug prescriptions) *                | 0.1500  | 0.0286 |
| 32 | History of Psychological Disease (from drug prescriptions) * | 0.2010  | <.0001 |
| 33 | History of Aortic Stenosis-Stage 3 *                         | 1.6666  | 0.0170 |
| 34 | History of Coronary Artery Disease-Stage 3 *                 | 0.5560  | 0.0019 |
| 35 | History of Diabetes Mellitus Type 1 or Type 2-Stage 2 *      | 1.0444  | <.0001 |
| 36 | History of Diabetes Mellitus Type 1 or Type 2-Stage 3 *      | 0.6990  | 0.0012 |
| 37 | History of Crohns Disease-Stage 2 or 3 *                     | 1.3534  | <.0001 |
| 38 | History of Neoplasm, Malignant: Colon and Rectum-Stage 3 *   | 0.9831  | 0.0009 |
| 39 | History of Neoplasm, Malignant: Stomach-Stage 3 *            | 2.1435  | 0.0007 |
| 40 | History of Ulcerative Colitis-any stage *                    | 0.6736  | 0.0177 |
| 41 | History of Calculus of the Urinary Tract-Stage 1 *           | 0.7453  | <.0001 |
| 42 | History of Calculus of the Urinary Tract-Stage 2 or 3 *      | 0.5209  | 0.0218 |
| 43 | History of Renal Failure-Stage 2 or 3 *                      | 0.5702  | 0.0006 |
| 44 | History of Neoplasm, Malignant: Ovaries-Stage 2 or 3 *       | 0.7030  | 0.0286 |
| 45 | History of Anemia: Aplastic, Acquired-Stage 2 or 3 *         | 0.7484  | 0.0026 |
| 46 | History of Cirrhosis of the Liver-Stage 2 or 3 *             | 0.4895  | 0.0014 |
| 47 |                                                              |         |        |
| 48 |                                                              |         |        |
| 49 |                                                              |         |        |
| 50 |                                                              |         |        |
| 51 |                                                              |         |        |
| 52 |                                                              |         |        |
| 53 |                                                              |         |        |
| 54 |                                                              |         |        |
| 55 |                                                              |         |        |
| 56 |                                                              |         |        |
| 57 |                                                              |         |        |
| 58 |                                                              |         |        |
| 59 |                                                              |         |        |
| 60 |                                                              |         |        |



|    |                                                                          |         |        |
|----|--------------------------------------------------------------------------|---------|--------|
| 1  |                                                                          |         |        |
| 2  |                                                                          |         |        |
| 3  | History of Pancreatitis-any stage *                                      | 0.7645  | 0.0043 |
| 4  | History of Cerebrovascular Disease-Stage 3 *                             | 0.3947  | 0.0087 |
| 5  | History of Obesity-Stage 2 or 3 *                                        | 0.8330  | <.0001 |
| 6  | History of polypharmacy *                                                | 0.2928  | <.0001 |
| 7  | History of Bipolar Disorder - Major Depressive Episode-Stage 2 or 3 *    | 0.6454  | 0.0038 |
| 8  |                                                                          |         |        |
| 9  |                                                                          |         |        |
| 10 | History of Bipolar Disorder - Manic Episode-Stage 2 *                    | 0.6630  | 0.0001 |
| 11 | History of Depression-Stage 1 or 2 *                                     | 0.4957  | <.0001 |
| 12 | History of Drug Abuse, Dependence, Intoxication: Alcohol-Stage 1 *       | 0.6357  | 0.0005 |
| 13 |                                                                          |         |        |
| 14 |                                                                          |         |        |
| 15 | History of Drug Abuse, Dependence, Intoxication: Alcohol-Stage 2 or 3 *  | 1.1324  | <.0001 |
| 16 |                                                                          |         |        |
| 17 |                                                                          |         |        |
| 18 | History of Chronic Obstructive Pulmonary Disease-Stage 1 or 2 *          | 0.4127  | 0.0104 |
| 19 | History of Chronic Obstructive Pulmonary Disease-Stage 3 *               | 1.3247  | 0.0050 |
| 20 | History of Neoplasm, Malignant: Lungs, Bronchi, or Mediastinum-Stage 3 * | 1.6041  | <.0001 |
| 21 |                                                                          |         |        |
| 22 | History of Neoplasm, Malignant: Melanoma-Stage 3 *                       | 1.6975  | 0.0026 |
| 23 | History of Other Cardiovascular drugs *                                  | 0.1255  | 0.0236 |
| 24 | Immunologic Disease (from any data source)                               | 0.7145  | 0.0003 |
| 25 | Infectious Disease (from any data source)                                | 0.5052  | 0.0335 |
| 26 | Neurologic Disease (from any data source)                                | 0.2075  | 0.0003 |
| 27 | Hospitalization                                                          | 0.3975  | <.0001 |
| 28 | Polypharmacy                                                             | 0.2655  | <.0001 |
| 29 | Any of the other 9 Cardiovascular drugs                                  | -0.2999 | 0.0008 |
| 30 | Number of the other 9 Cardiovascular drugs                               | 0.1482  | <.0001 |
| 31 |                                                                          |         |        |
| 32 |                                                                          |         |        |
| 33 |                                                                          |         |        |
| 34 |                                                                          |         |        |
| 35 |                                                                          |         |        |
| 36 |                                                                          |         |        |
| 37 |                                                                          |         |        |
| 38 |                                                                          |         |        |
| 39 |                                                                          |         |        |
| 40 |                                                                          |         |        |
| 41 |                                                                          |         |        |
| 42 |                                                                          |         |        |
| 43 |                                                                          |         |        |
| 44 |                                                                          |         |        |
| 45 |                                                                          |         |        |
| 46 |                                                                          |         |        |
| 47 |                                                                          |         |        |
| 48 |                                                                          |         |        |
| 49 |                                                                          |         |        |
| 50 |                                                                          |         |        |
| 51 |                                                                          |         |        |
| 52 |                                                                          |         |        |
| 53 |                                                                          |         |        |
| 54 |                                                                          |         |        |
| 55 |                                                                          |         |        |
| 56 |                                                                          |         |        |
| 57 |                                                                          |         |        |
| 58 |                                                                          |         |        |
| 59 |                                                                          |         |        |
| 60 |                                                                          |         |        |

### Males 45-54

| Variable                                                               | Coefficient | p-value |
|------------------------------------------------------------------------|-------------|---------|
| Intercept                                                              | -4.4469     | <.0001  |
| Number of Chronic Conditions (from any data source)=1                  | 0.3859      | <.0001  |
| Number of Chronic Conditions (from any data source)=2                  | 0.6634      | <.0001  |
| Number of Chronic Conditions (from any data source)=3                  | 0.7465      | <.0001  |
| Number of Chronic Conditions (from any data source)=4                  | 0.7901      | <.0001  |
| Number of Chronic Conditions (from any data source)=5 or more          | 0.5246      | <.0001  |
| Number of Chronic Conditions (from hospital data)=1                    | 0.2577      | 0.0009  |
| Number of Chronic Conditions (from hospital data)=2                    | 0.3237      | 0.0015  |
| Number of Chronic Conditions (from hospital data)=3 or more            | 0.4067      | 0.0021  |
| Number of Chronic Conditions (from home health prescription)=1 or more | 0.8811      | <.0001  |
| Age on 12 /31/ 2012                                                    | -0.00008    | <.0001  |
| Cancer (chemo or radiation )                                           | 0.5498      | 0.0011  |

|    |                                                             |         |        |
|----|-------------------------------------------------------------|---------|--------|
| 1  |                                                             |         |        |
| 2  |                                                             |         |        |
| 3  | Genitourinary (dialysis)                                    | 0.9242  | <.0001 |
| 4  | Aortic Stenosis-Stage 3                                     | 2.0591  | 0.0014 |
| 5  | Arrhythmias-Stage 2                                         | 0.5607  | 0.0005 |
| 6  | Essential Hypertension-Stage 2                              | -0.6186 | 0.0030 |
| 7  | Neoplasm, Malignant Hematologic-Stage 3                     | -1.5129 | 0.0096 |
| 8  | Cirrhosis of the Liver-Stage 2 or 3                         | 0.8760  | <.0001 |
| 9  | Pancreatitis-all stages                                     | 0.9702  | <.0001 |
| 10 | Chronic Obstructive Pulmonary Disease-Stage 3               | 1.2772  | 0.0051 |
| 11 | Neoplasm, Malignant: Lungs, Bronchi, or Mediastinum-Stage 3 | 1.5413  | <.0001 |
| 12 | Any Cancer - Stage 3 (from hospital data)                   | 1.5337  | <.0001 |
| 13 | Any Cardiovascular - Stage 3 (from hospital data)           | 0.4528  | <.0001 |
| 14 | Any Endocrine Disease - Stage 1 (from hospital data)        | -0.2681 | 0.0085 |
| 15 | Any Endocrine - Stage 2 (from hospital data)                | 0.3403  | 0.0055 |
| 16 | Any Gastrointestinal Disease - Stage 2 (from hospital data) | 0.7672  | <.0001 |
| 17 | Any Immunologic Disease - All stages (from hospital data)   | 0.7049  | <.0001 |
| 18 | Any Musculoskeletal Disease - Stage 1 (from hospital data)  | -0.3976 | <.0001 |
| 19 | Any Neurologic Disease - Stage 3 (from hospital data)       | 0.4660  | 0.0008 |
| 20 | Any Psychologic Disease - Stage 2 (from hospital data)      | 0.8976  | <.0001 |
| 21 | Cardiovascular Disease (from drug prescriptions)            | -0.1612 | 0.0030 |
| 22 | Eye Disease (from drug prescriptions)                       | -0.5308 | <.0001 |
| 23 | Genitourinary Disease (from drug prescriptions)             | 0.4405  | 0.0099 |
| 24 | Hematologic Disease (from drug prescriptions)               | 0.5097  | 0.0070 |
| 25 | Hepatobiliary Disease (from drug prescriptions)             | 0.3691  | 0.0179 |
| 26 | Number of day hospitalizations                              | 0.1160  | 0.0093 |
| 27 | Statins                                                     | -0.1389 | 0.0112 |
| 28 | Anti-platelets                                              | 0.2288  | <.0001 |
| 29 | Anti-arrhythmics                                            | 0.3517  | 0.0063 |
| 30 | Nitrates                                                    | 0.4390  | <.0001 |
| 31 | Total number of ER visits                                   | 0.1627  | <.0001 |
| 32 | History of Cancer (from drug prescriptions) *               | 0.3251  | 0.0004 |
| 33 | History of Aortic Stenosis-Stage 1 *                        | -0.9794 | 0.0150 |
| 34 | History of Arrhythmias-Stage 2 *                            | 0.3919  | 0.0019 |
| 35 | History of Cardiomyopathies-Stage 3 *                       | 0.7836  | <.0001 |
| 36 | History of Coronary Artery Disease-Stage 1 *                | 0.3743  | <.0001 |
| 37 | History of Thrombophlebitis-Stage 2 or 3 *                  | 0.7954  | <.0001 |
| 38 | History of Diabetes Mellitus Type 1 or Type 2-Stage 1 *     | 0.3220  | 0.0001 |
| 39 | History of Diabetes Mellitus Type 1 or Type 2-Stage 3 *     | 0.8677  | <.0001 |
| 40 | History of Calculus of the Urinary Tract-Stage 1 *          | 0.3374  | 0.0033 |
| 41 | History of Renal Failure-Stage 2 or 3 *                     | 0.4042  | 0.0033 |
| 42 | History of Cholecystitis and Cholelithiasis-Stage 1 *       | 0.5888  | 0.0001 |
| 43 | History of Cirrhosis of the Liver-Stage 2 or 3 *            | 0.4954  | <.0001 |
| 44 | History of Neoplasm, Malignant: Pancreas-Stage 2 or 3 *     | 1.9346  | 0.0029 |
| 45 | History of Pancreatitis-any stage *                         | 0.5981  | 0.0009 |
| 46 | History of Obesity-Stage 2 or 3 *                           | 0.5126  | <.0001 |
| 47 |                                                             |         |        |
| 48 |                                                             |         |        |
| 49 |                                                             |         |        |
| 50 |                                                             |         |        |
| 51 |                                                             |         |        |
| 52 |                                                             |         |        |
| 53 |                                                             |         |        |
| 54 |                                                             |         |        |
| 55 |                                                             |         |        |
| 56 |                                                             |         |        |
| 57 |                                                             |         |        |
| 58 |                                                             |         |        |
| 59 |                                                             |         |        |
| 60 |                                                             |         |        |

|                                                                         |         |        |
|-------------------------------------------------------------------------|---------|--------|
| History of polypharmacy *                                               | 0.2306  | <.0001 |
| History of Bipolar Disorder - Manic Episode-Stage 2 *                   | 0.8192  | <.0001 |
| History of Depression-Stage 1 or 2 *                                    | 0.2814  | 0.0098 |
| History of Drug Abuse, Dependence, Intoxication: Alcohol-Stage 1 *      | 0.4287  | 0.0020 |
| History of Drug Abuse, Dependence, Intoxication: Alcohol-Stage 2 or 3 * | 0.9474  | <.0001 |
| History of Pneumonia: Bacterial-Stage 3 *                               | 1.1780  | <.0001 |
| History of Other Cardiovascular drugs *                                 | 0.2404  | <.0001 |
| Male Genital System (from any data source)                              | -0.3177 | 0.0021 |
| Neurologic Disease (from any data source)                               | 0.2173  | 0.0002 |
| Hospitalization                                                         | 0.4249  | <.0001 |
| Number of hospitalizations                                              | 0.0445  | 0.1777 |
| Polypharmacy                                                            | 0.2976  | <.0001 |
| Gastrointestinal Disease (from hospital data)                           | -0.2445 | 0.0085 |

#### Females 55-64

| Variable                                                               | Coefficient | p-value |
|------------------------------------------------------------------------|-------------|---------|
| Intercept                                                              | 0.9467      | 0.6785  |
| Number of Chronic Conditions (from any data source)=1                  | 0.5017      | <.0001  |
| Number of Chronic Conditions (from any data source)=2                  | 0.6666      | <.0001  |
| Number of Chronic Conditions (from any data source)=3                  | 0.7010      | <.0001  |
| Number of Chronic Conditions (from any data source)=4                  | 0.7868      | 0.0001  |
| Number of Chronic Conditions (from any data source)=5                  | 0.7545      | 0.0024  |
| Number of Chronic Conditions (from any data source)=6 or more          | 0.5597      | 0.0587  |
| Number of Chronic Conditions (from hospital data)=1                    | 0.5017      | <.0001  |
| Number of Chronic Conditions (from hospital data)=2                    | 0.6365      | <.0001  |
| Number of Chronic Conditions (from hospital data)=3                    | 0.7653      | <.0001  |
| Number of Chronic Conditions (from hospital data)=4 or more            | 0.7953      | 0.0007  |
| Number of Chronic Conditions (from home health prescription)=1 or more | 0.4889      | <.0001  |
| Number of Chronic Conditions (from drug prescriptions)=1               | -0.3395     | 0.0003  |
| Number of Chronic Conditions (from drug prescriptions)=2               | -0.3996     | 0.0020  |
| Number of Chronic Conditions (from drug prescriptions)=3               | -0.4436     | 0.0073  |
| Number of Chronic Conditions (from drug prescriptions)=4               | -0.5404     | 0.0083  |
| Number of Chronic Conditions (from drug prescriptions)=5 or more       | -0.4198     | 0.0955  |
| Age on 12/ 31/ 2012                                                    | -0.1094     | 0.0134  |
| Endocrine Disease (from home health prescription)                      | 0.9016      | 0.0026  |
| Gastrointestinal Disease (from home health prescription)               | -0.6807     | 0.1725  |
| Genitourinary Disease (from home health prescription)                  | 1.1277      | 0.1537  |
| Blood Diseases (from home health prescription)                         | -1.8804     | 0.1597  |
| Infectious Disease (from home health prescription)                     | 1.2458      | 0.0624  |
| Musculoskeletal Disease (from home health prescription)                | 0.7627      | 0.0235  |

|    |                                                       |         |        |
|----|-------------------------------------------------------|---------|--------|
| 1  |                                                       |         |        |
| 2  |                                                       |         |        |
| 3  | Neurologic Diseases (from home health prescription)   | 0.7672  | 0.0003 |
| 4  | Respiratory Diseases (from home health prescription)  | 1.0350  | 0.0211 |
| 5  | Skin Disease (from home health prescription)          | 0.4575  | 0.2643 |
| 6  | Cancer (chemo or radiation )                          | 0.2011  | 0.0741 |
| 7  | Genitourinary (dialysis)                              | -0.2335 | 0.2676 |
| 8  | Aneurysm, Thoracic-all stages                         | 0.7181  | 0.1737 |
| 9  | Arrhythmias-Stage 1                                   | -0.8531 | 0.1853 |
| 10 | Arrhythmias-Stage 3                                   | -0.4355 | 0.3839 |
| 11 | Congestive Heart Failure-Stage3                       | 0.5326  | 0.0248 |
| 12 | Essential Hypertension-Stage 2                        | -0.4672 | 0.0156 |
| 13 | Mitral Stenosis-Stage 1                               | 0.3593  | 0.1871 |
| 14 | Mitral Stenosis-Stage 2                               | 0.4834  | 0.2609 |
| 15 | Pericarditis: Viral or Traumatic-Stage 2 or 3         | -1.2494 | 0.1428 |
| 16 | Thrombophlebitis-Stage 2 or 3                         | 0.3434  | 0.2209 |
| 17 | Tibial/Iliac/Femoral/Popliteal Artery Disease-Stage 1 | 0.2126  | 0.4831 |
| 18 | Diabetes Mellitus Type 1 or Type 2-Stage 3            | -1.2846 | 0.0001 |
| 19 | Hyperthyroidism-Stage 1                               | -0.6448 | 0.1376 |
| 20 | Hypothyroidism-Stage 1                                | -0.1514 | 0.2913 |
| 21 | Hypothyroidism-Stage 2 or 3                           | -0.4319 | 0.2665 |
| 22 | Crohns Disease-Stage 2 or 3                           | -1.3093 | 0.2190 |
| 23 | Diverticular Disease-Stage 1                          | -0.3203 | 0.2326 |
| 24 | Diverticular Disease-Stage 2 or 3                     | -1.7244 | 0.0142 |
| 25 | Gastritis-Stage 2 or 3                                | -0.4282 | 0.3525 |
| 26 | Hernia, Hiatal or Reflux Esophagitis-Stage 1          | -0.4908 | 0.0465 |
| 27 | Hernia, Hiatal or Reflux Esophagitis-Stage 2 or 3     | -0.6378 | 0.2767 |
| 28 | Neoplasm, Malignant: Colon and Rectum-Stage 2         | -0.6795 | 0.0391 |
| 29 | Neoplasm, Malignant: Colon and Rectum-Stage 3         | 0.9264  | <.0001 |
| 30 | Neoplasm, Malignant: Stomach-Stage 1                  | 0.5593  | 0.2519 |
| 31 | Neoplasm, Malignant: Stomach-Stage 3                  | 0.6181  | 0.1650 |
| 32 | Ulcerative Colitis-all stages                         | 0.5059  | 0.1961 |
| 33 | Neoplasm, Malignant: Bladder, Urinary-Stage 1         | -0.3433 | 0.3353 |
| 34 | Neoplasm, Malignant: Kidneys-Stage 1                  | 0.3389  | 0.3869 |
| 35 | Renal Failure-Stage 2 or 3                            | 0.3465  | 0.0464 |
| 36 | Neoplasm, Malignant: Breast, Female-Stage 1           | -0.9369 | <.0001 |
| 37 | Neoplasm, Malignant: Ovaries-Stage 1                  | -0.7428 | 0.0657 |
| 38 | Anemia: Aplastic, Acquired-Stage 2 or 3               | 0.3219  | 0.2666 |
| 39 | Neoplasm, Malignant Hematologic-Stage 1               | -0.4013 | 0.0971 |
| 40 | Neoplasm, Malignant Hematologic-Stage 2               | -0.6307 | 0.0974 |
| 41 | Neoplasm, Malignant Hematologic-Stage 3               | -0.5380 | 0.2971 |
| 42 | Cholecystitis and Cholelithiasis-Stage 1              | 0.7769  | 0.0033 |
| 43 | Cholecystitis and Cholelithiasis-Stage 2              | 1.3013  | 0.0057 |
| 44 | Cirrhosis of the Liver-Stage 2 or 3                   | 0.7679  | <.0001 |
| 45 | Neoplasm, Malignant: Pancreas-Stage 1                 | 0.8360  | 0.0386 |
| 46 | Neoplasm, Malignant: Pancreas-Stage 2 or 3            | 1.3469  | 0.0051 |
| 47 |                                                       |         |        |
| 48 |                                                       |         |        |
| 49 |                                                       |         |        |
| 50 |                                                       |         |        |
| 51 |                                                       |         |        |
| 52 |                                                       |         |        |
| 53 |                                                       |         |        |
| 54 |                                                       |         |        |
| 55 |                                                       |         |        |
| 56 |                                                       |         |        |
| 57 |                                                       |         |        |
| 58 |                                                       |         |        |
| 59 |                                                       |         |        |
| 60 |                                                       |         |        |

|    |                                                             |         |        |
|----|-------------------------------------------------------------|---------|--------|
| 1  |                                                             |         |        |
| 2  |                                                             |         |        |
| 3  | Pancreatitis-all stages                                     | 1.0560  | 0.0079 |
| 4  | Progressive Systemic Sclerosis-Stage 2 or 3                 | 1.0431  | 0.0155 |
| 5  | Cerebrovascular Disease-Stage 1                             | 0.2701  | 0.2083 |
| 6  | Cerebrovascular Disease-Stage 2                             | -0.2745 | 0.2425 |
| 7  | Cerebrovascular Disease-Stage 3                             | -0.2845 | 0.3180 |
| 8  | Dementia: Primary Degenerative (Alzheimer or Pick)-Stage 1  | 0.6421  | 0.0743 |
| 9  | Epilepsy-all stages                                         | -0.4298 | 0.1025 |
| 10 | Bipolar Disorder - Major Depressive Episode-Stage 2 or 3    | -0.5924 | 0.2896 |
| 11 | Depression-Stage 1 or 2                                     | 0.1495  | 0.4002 |
| 12 | Drug Abuse, Dependence, Intoxication: Alcohol-Stage 1       | -0.6312 | 0.2187 |
| 13 | Drug Abuse, Dependence, Intoxication: Alcohol-Stage 2 or 3  | 0.4370  | 0.1568 |
| 14 | Chronic Obstructive Pulmonary Disease-Stage 1 or 2          | 0.1433  | 0.4617 |
| 15 | Neoplasm, Malignant: Lungs, Bronchi, or Mediastinum-Stage 1 | 0.4562  | 0.0554 |
| 16 | Neoplasm, Malignant: Lungs, Bronchi, or Mediastinum-Stage 3 | 0.4995  | 0.0489 |
| 17 | Pneumonia: Bacterial-Stage 1                                | 0.3737  | 0.0753 |
| 18 | Pneumonia: Bacterial-Stage 3                                | -0.4891 | 0.1195 |
| 19 | Pulmonary Embolism-Stage 3                                  | 0.8005  | 0.0250 |
| 20 | Any Cancer - Stage 1 (from hospital data)                   | 0.2989  | 0.0931 |
| 21 | Any Cancer - Stage 2 (from hospital data)                   | 0.2308  | 0.2732 |
| 22 | Any Cancer - Stage 3 (from hospital data)                   | 0.8552  | <.0001 |
| 23 | Any Cardiovascular Disease - Stage 1 (from hospital data)   | -0.2364 | 0.0023 |
| 24 | Any Cardiovascular Disease - Stage 2 (from hospital data)   | 0.0953  | 0.3950 |
| 25 | Any Cardiovascular Disease - Stage 3 (from hospital data)   | 0.1844  | 0.1691 |
| 26 | Any Endocrine - Stage 2 (from hospital data)                | 0.4515  | <.0001 |
| 27 | Any Endocrine Disease - Stage 3 (from hospital data)        | 0.7544  | 0.0013 |
| 28 | Any Ear,Nose,Throat Disease - Stage 2 (from hospital data)  | -0.8908 | 0.3948 |
| 29 | Any Gastrointestinal Disease - Stage 2 (from hospital data) | 0.3647  | 0.0445 |
| 30 | Any Hepatobiliary Disease - Stage 1 (from hospital data)    | -0.6278 | 0.0950 |
| 31 | Any Hepatobiliary Disease - Stage 2 (from hospital data)    | -0.4898 | 0.3504 |
| 32 | Any Infectious Disease - Stage 3 (from hospital data)       | -0.3543 | 0.3858 |
| 33 | Any Neurologic Disease - Stage 2 (from hospital data)       | 0.5032  | 0.0016 |
| 34 | Any Neurologic Disease - Stage 3 (from hospital data)       | 0.4457  | 0.0740 |
| 35 | Any Psychologic Disease - Stage 1 (from hospital data)      | -0.2030 | 0.1733 |
| 36 | Any Psychologic Disease - Stage 2 (from hospital data)      | 0.1866  | 0.3379 |
| 37 | Any Psychologic Disease - Stage 3 (from hospital data)      | 0.9858  | 0.0302 |
| 38 | Any Respiratory Disease – Stage 1 (from hospital data)      | -0.3063 | 0.0617 |
| 39 | Any Respiratory Disease - Stage 3 (from hospital data)      | 0.9969  | <.0001 |
| 40 | Any Skin Disease - Stage 2 (from hospital data)             | -0.5257 | 0.1185 |
| 41 | Neoplasm, Malignant: Melanoma-Stage 2                       | -1.2688 | 0.1880 |
| 42 | Neoplasm, Malignant: Melanoma-Stage 3                       | 1.5149  | 0.0037 |
| 43 | Cancer (from any data source)                               | -0.3957 | 0.0036 |
| 44 | Cancer (from drug prescription)                             | 0.4367  | 0.0002 |
| 45 | Eye Disease (from drug prescriptions)                       | 0.4615  | 0.0460 |
| 46 | Gastrointestinal Disease (from drug prescriptions)          | 0.0544  | 0.1584 |
| 47 |                                                             |         |        |
| 48 |                                                             |         |        |
| 49 |                                                             |         |        |
| 50 |                                                             |         |        |
| 51 |                                                             |         |        |
| 52 |                                                             |         |        |
| 53 |                                                             |         |        |
| 54 |                                                             |         |        |
| 55 |                                                             |         |        |
| 56 |                                                             |         |        |
| 57 |                                                             |         |        |
| 58 |                                                             |         |        |
| 59 |                                                             |         |        |
| 60 |                                                             |         |        |

|    |                                                                         |         |        |
|----|-------------------------------------------------------------------------|---------|--------|
| 1  |                                                                         |         |        |
| 2  |                                                                         |         |        |
| 3  | Genitourinary Disease (from drug prescriptions)                         | 0.2762  | 0.1949 |
| 4  | Immunologic Disease (from drug prescriptions)                           | -1.0597 | 0.0780 |
| 5  | Psychological Disease (from drug prescriptions)                         | -0.1619 | 0.3523 |
| 6  | Respiratory Disease (from drug prescriptions)                           | 0.2058  | 0.0005 |
| 7  | Skin Disease (from drug prescriptions)                                  | 0.1296  | 0.4503 |
| 8  | Day hospitalization                                                     | -0.0504 | 0.4576 |
| 9  | Drug-Drug interactions                                                  | 0.2803  | 0.0229 |
| 10 | Statins                                                                 | -0.2104 | <.0001 |
| 11 | Beta-blockers                                                           | 0.0461  | 0.1974 |
| 12 | Anti-platelets                                                          | 0.1061  | 0.0107 |
| 13 | Calcium channel blockers                                                | 0.0933  | 0.0329 |
| 14 | Anti-arrhythmics                                                        | 0.2835  | 0.0060 |
| 15 | Digitalis glycosides                                                    | -0.2094 | 0.2138 |
| 16 | Nitrates                                                                | 0.4632  | <.0001 |
| 17 | Diuretics                                                               | 0.2687  | <.0001 |
| 18 | Ear,Nose,Throat Disease (from any data source)                          | -0.3916 | 0.1154 |
| 19 | Number of ER visits labeled 'Yellow'                                    | 0.0881  | 0.2672 |
| 20 | Total number of ER visits                                               | 0.1621  | 0.0341 |
| 21 | Eye Disease (from any data source)                                      | -0.6320 | 0.0043 |
| 22 | Genitourinary Disease (from any data source)                            | 0.7024  | 0.0014 |
| 23 | Gynecologic Disease (from any data source)                              | -0.6085 | <.0001 |
| 24 | Hematologic Disease (from any data source)                              | 0.2896  | 0.0019 |
| 25 | Hepatobiliary Disease (from any data source)                            | 0.4386  | 0.0713 |
| 26 | History of Cancer (from drug prescriptions) *                           | 0.2544  | <.0001 |
| 27 | History of Neurological Disease (from drug prescriptions) *             | 0.0571  | 0.2898 |
| 28 | History of Respiratory Disease (from drug prescriptions) *              | 0.0775  | 0.0855 |
| 29 | History of Aortic Stenosis-Stage 1 *                                    | 0.1809  | 0.4275 |
| 30 | History of Arrhythmias-Stage 2 *                                        | 0.3253  | 0.0041 |
| 31 | History of Arrhythmias-Stage 3 *                                        | 0.3799  | 0.2085 |
| 32 | History of Cardiomyopathies-Stage 2 *                                   | 0.4667  | 0.0155 |
| 33 | History of Congestive Heart Failure-Stage 3 *                           | 0.1210  | 0.4597 |
| 34 | History of Coronary Artery Disease-Stage 1 *                            | 0.3581  | 0.0002 |
| 35 | History of Coronary Artery Disease-Stage 2 *                            | 0.1121  | 0.4469 |
| 36 | History of Coronary Artery Disease-Stage 3 *                            | 0.3913  | 0.0023 |
| 37 | History of Essential Hypertension-Stage 1 *                             | 0.0703  | 0.1748 |
| 38 | History of Infective Endocarditis-Stage 3 *                             | -0.5804 | 0.3469 |
| 39 | History of Mitral Stenosis-Stage 2 *                                    | 0.4323  | 0.1047 |
| 40 | History of Pericarditis: Viral or Traumatic-Stage 2 or 3 *              | -0.5354 | 0.2771 |
| 41 | History of Tibial/Iliac/Femoral/Popliteal Artery Disease-Stage 2 or 3 * | 0.5543  | 0.0659 |
| 42 | History of Diabetes Mellitus Type 1 or Type 2-Stage 1 *                 | 0.3017  | <.0001 |
| 43 | History of Diabetes Mellitus Type 1 or Type 2-Stage 2 *                 | 0.3810  | 0.0005 |
| 44 | History of Diabetes Mellitus Type 1 or Type 2-Stage 3 *                 | 0.4846  | 0.0020 |
| 45 | History of Hypothyroidism-Stage 2 or 3 *                                | 0.2600  | 0.3833 |
| 46 |                                                                         |         |        |
| 47 |                                                                         |         |        |
| 48 |                                                                         |         |        |
| 49 |                                                                         |         |        |
| 50 |                                                                         |         |        |
| 51 |                                                                         |         |        |
| 52 |                                                                         |         |        |
| 53 |                                                                         |         |        |
| 54 |                                                                         |         |        |
| 55 |                                                                         |         |        |
| 56 |                                                                         |         |        |
| 57 |                                                                         |         |        |
| 58 |                                                                         |         |        |
| 59 |                                                                         |         |        |
| 60 |                                                                         |         |        |

|    |                                                                                  |         |        |
|----|----------------------------------------------------------------------------------|---------|--------|
| 1  |                                                                                  |         |        |
| 2  |                                                                                  |         |        |
| 3  | History of Crohns Disease-Stage 2 or 3 *                                         | 0.7668  | 0.0458 |
| 4  | History of Diverticular Disease-Stage 1 *                                        | 0.3579  | 0.0123 |
| 5  |                                                                                  |         |        |
| 6  | History of Diverticular Disease-Stage 2 or 3 *                                   | 0.7500  | 0.0026 |
| 7  | History of Neoplasm, Malignant: Stomach-Stage 3 *                                | 1.3562  | 0.0009 |
| 8  | History of Calculus of the Urinary Tract-Stage 1 *                               | 0.1328  | 0.4254 |
| 9  |                                                                                  |         |        |
| 10 | History of Calculus of the Urinary Tract-Stage 2 or 3 *                          | 0.1600  | 0.4523 |
| 11 | History of Neoplasm, Malignant: Kidneys-Stage 1 *                                | -0.2475 | 0.4638 |
| 12 | History of Neoplasm, Malignant: Kidneys-Stage 3 *                                | 1.1246  | 0.0296 |
| 13 | History of Renal Failure-Stage 2 or 3 *                                          | 0.5356  | <.0001 |
| 14 | History of Neoplasm, Malignant: Breast, Female-Stage 1 *                         | -0.2892 | 0.0025 |
| 15 | History of Neoplasm, Malignant: Breast, Female-Stage 3 *                         | 0.5799  | 0.0001 |
| 16 | History of Neoplasm, Malignant: Ovaries-Stage 2 or 3 *                           | 0.4641  | 0.0675 |
| 17 | History of Anemia: Aplastic, Acquired-Stage 2 or 3 *                             | 0.2917  | 0.1730 |
| 18 | History of Neoplasm, Malignant Hematologic-Stage 2 *                             | 0.2692  | 0.3031 |
| 19 | History of Neoplasm, Malignant Hematologic-Stage 2 *                             | -0.6343 | 0.2195 |
| 20 | History of Cholecystitis and Cholelithiasis-Stage 2 *                            | 0.4606  | 0.0057 |
| 21 | History of Cholecystitis and Cholelithiasis-Stage 3 *                            | -0.3862 | 0.3756 |
| 22 | History of Cirrhosis of the Liver-Stage 2 or 3 *                                 | 0.1037  | 0.4226 |
| 23 | History of Neoplasm, Malignant: Pancreas-Stage 1 *                               | 0.9151  | 0.0222 |
| 24 | History of Neoplasm, Malignant: Pancreas-Stage 2 or 3 *                          | -1.0822 | 0.1459 |
| 25 | History of Pancreatitis-any stage *                                              | 0.2106  | 0.4490 |
| 26 | History of Progressive Systemic Sclerosis-Stage 1 *                              | 0.2697  | 0.2504 |
| 27 | History of Progressive Systemic Sclerosis-Stage 2 or 3 *                         | -0.4137 | 0.2802 |
| 28 | History of Cerebrovascular Disease-Stage 1 *                                     | 0.2919  | 0.0479 |
| 29 | History of Cerebrovascular Disease-Stage 2 *                                     | 0.1387  | 0.2983 |
| 30 | History of Cerebrovascular Disease-Stage 3 *                                     | 0.3321  | 0.0030 |
| 31 | History of Dementia: Primary Degenerative (Alzheimer or Pick)-<br>Stage 1 *      | 0.2370  | 0.3913 |
| 32 | History of Dementia: Primary Degenerative (Alzheimer or Pick)-<br>Stage 2 or 3 * | 1.0816  | 0.1258 |
| 33 | History of Obesity-Stage 2 or 3 *                                                | 0.2556  | 0.0066 |
| 34 | History of polypharmacy *                                                        | 0.1792  | <.0001 |
| 35 | History of Bipolar Disorder - Major Depressive Episode-Stage 2 or<br>3 *         | 0.5506  | 0.0209 |
| 36 | History of Bipolar Disorder - Manic Episode-Stage 2 *                            | 0.6414  | 0.0002 |
| 37 | History of Depression-Stage 1 or 2 *                                             | 0.3655  | <.0001 |
| 38 | History of Drug Abuse, Dependence, Intoxication: Alcohol-Stage 1<br>*            | 0.6588  | 0.0024 |
| 39 | History of Drug Abuse, Dependence, Intoxication: Alcohol-Stage 2<br>or 3 *       | 0.6840  | <.0001 |
| 40 | History of Chronic Obstructive Pulmonary Disease-Stage 1 or 2 *                  | 0.4496  | <.0001 |
| 41 | History of Chronic Obstructive Pulmonary Disease-Stage 3 *                       | 0.9085  | <.0001 |
| 42 | History of Neoplasm, Malignant: Lungs, Bronchi, or Mediastinum-<br>Stage 2 *     | 1.1063  | 0.0136 |
| 43 |                                                                                  |         |        |
| 44 |                                                                                  |         |        |
| 45 |                                                                                  |         |        |
| 46 |                                                                                  |         |        |
| 47 |                                                                                  |         |        |
| 48 |                                                                                  |         |        |
| 49 |                                                                                  |         |        |
| 50 |                                                                                  |         |        |
| 51 |                                                                                  |         |        |
| 52 |                                                                                  |         |        |
| 53 |                                                                                  |         |        |
| 54 |                                                                                  |         |        |
| 55 |                                                                                  |         |        |
| 56 |                                                                                  |         |        |
| 57 |                                                                                  |         |        |
| 58 |                                                                                  |         |        |
| 59 |                                                                                  |         |        |
| 60 |                                                                                  |         |        |

|                                                                          |         |        |
|--------------------------------------------------------------------------|---------|--------|
| History of Neoplasm, Malignant: Lungs, Bronchi, or Mediastinum-Stage 3 * | 0.4570  | 0.1957 |
| History of Pneumonia: Bacterial-Stage 2 *                                | 0.7303  | 0.1047 |
| History of Oral Anti-coagulants *                                        | 0.4605  | <.0001 |
| History of Other Cardiovascular drugs *                                  | 0.0431  | 0.3044 |
| History of Statins *                                                     | 0.0710  | 0.1377 |
| Immunologic Disease (from any data source)                               | 0.7304  | 0.0366 |
| Neurologic Disease (from any data source)                                | 0.2104  | 0.0008 |
| Hospitalization                                                          | 0.2413  | 0.0005 |
| Polypharmacy                                                             | 0.3614  | <.0001 |
| Psychological Disease (from any data source)                             | 0.2990  | 0.0875 |
| Cancer (from hospital data)                                              | 0.2380  | 0.2926 |
| Gastrointestinal Disease (from hospital data)                            | -0.2031 | 0.0659 |
| Genitourinary Disease (from hospital data)                               | -0.4981 | 0.0234 |
| Hepatobiliary (from hospital data)                                       | -0.5335 | 0.2235 |
| Musculoskeletal Disease (from hospital data)                             | -0.4348 | <.0001 |
| Any of the other 9 Cardiovascular drugs                                  | -0.1434 | 0.0142 |

#### Males 55-64

| Variable                                                               | Coefficient | p-value |
|------------------------------------------------------------------------|-------------|---------|
| Intercept                                                              | -4.2367     | <.0001  |
| Number of Chronic Conditions (from any data source)=1                  | 0.3641      | <.0001  |
| Number of Chronic Conditions (from any data source)=2                  | 0.7530      | <.0001  |
| Number of Chronic Conditions (from any data source)=3                  | 1.0181      | <.0001  |
| Number of Chronic Conditions (from any data source)=4                  | 1.2055      | <.0001  |
| Number of Chronic Conditions (from any data source)=5                  | 1.4339      | <.0001  |
| Number of Chronic Conditions (from any data source)=6 or more          | 1.4674      | <.0001  |
| Number of Chronic Conditions (from hospital data)=1                    | 0.4141      | <.0001  |
| Number of Chronic Conditions (from hospital data)=2                    | 0.5725      | <.0001  |
| Number of Chronic Conditions (from hospital data)=3                    | 0.7463      | <.0001  |
| Number of Chronic Conditions (from hospital data)=4 or more            | 0.6436      | 0.0066  |
| Number of Chronic Conditions (from home health prescription)=1 or more | -0.5216     | 0.0939  |
| Number of Chronic Conditions (from drug prescriptions)=1               | -0.0825     | 0.3624  |
| Number of Chronic Conditions (from drug prescriptions)=2               | -0.3715     | 0.0074  |
| Number of Chronic Conditions (from drug prescriptions)=3               | -0.5199     | 0.0060  |
| Number of Chronic Conditions (from drug prescriptions)=4               | -0.7343     | 0.0025  |
| Number of Chronic Conditions (from drug prescriptions)=5 or more       | -0.8378     | 0.0069  |
| Age on 12 /31/ 2012                                                    | -0.00009    | <.0001  |
| Cancer (from home health prescription)                                 | 1.5149      | <.0001  |
| Cardiovascular Disease (from home health prescription)                 | 0.6241      | 0.0555  |
| Endocrine Disease (from home health prescription)                      | 1.2243      | 0.0016  |
| Genitourinary Disease (from home health prescription)                  | 0.5007      | 0.4113  |



|    |                                                         |         |        |
|----|---------------------------------------------------------|---------|--------|
| 1  |                                                         |         |        |
| 2  |                                                         |         |        |
| 3  | Blood Diseases (from home health prescription)          | 1.2676  | 0.2946 |
| 4  | Musculoskeletal Disease (from home health prescription) | 1.2147  | 0.0136 |
| 5  | Neurologic Diseases (from home health prescription)     | 1.5200  | <.0001 |
| 6  | Mental Disorders (from home health prescription)        | 0.9790  | 0.0086 |
| 7  | Respiratory Diseases (from home health prescription)    | 0.5207  | 0.3572 |
| 8  | Skin Disease (from home health prescription)            | 1.2618  | 0.0224 |
| 9  | Cancer (chemo or radiation )                            | 0.4095  | 0.0006 |
| 10 | Genitourinary (dialysis)                                | 0.4977  | 0.0006 |
| 11 | Aneurysm, Abdominal-all stages                          | -0.4983 | 0.0674 |
| 12 | Aneurysm, Thoracic-all stages                           | -1.0860 | 0.0027 |
| 13 | Aortic Stenosis-Stage 3                                 | 0.3053  | 0.4855 |
| 14 | Arrhythmias-Stage 1                                     | 0.3575  | 0.2891 |
| 15 | Arrhythmias-Stage 3                                     | 0.4253  | 0.1234 |
| 16 | Cardiomyopathies-Stage 2                                | 0.1958  | 0.2233 |
| 17 | Cardiomyopathies-Stage 3                                | 0.3422  | 0.0864 |
| 18 | Congestive Heart Failure-Stage3                         | 0.2219  | 0.2411 |
| 19 | Coronary Artery Disease-Stage 1                         | -0.0683 | 0.3883 |
| 20 | Coronary Artery Disease-Stage 2                         | 0.0967  | 0.3847 |
| 21 | Essential Hypertension-Stage 2                          | -0.1509 | 0.2134 |
| 22 | Mitral Stenosis-Stage 2                                 | 0.4867  | 0.0815 |
| 23 | Thrombophlebitis-Stage 1                                | 0.3111  | 0.1622 |
| 24 | Thrombophlebitis-Stage 2 or 3                           | 0.2554  | 0.2361 |
| 25 | Tibial/Iliac/Femoral/Popliteal Artery Disease-Stage 1   | 0.1621  | 0.2869 |
| 26 | Crohns Disease-Stage 1                                  | 1.2423  | 0.0002 |
| 27 | Diverticular Disease-Stage 1                            | 0.1565  | 0.4435 |
| 28 | Diverticular Disease-Stage 2 or 3                       | -0.6513 | 0.1725 |
| 29 | Functional Digestive Disorders-Stage 1                  | 0.2423  | 0.3863 |
| 30 | Hernia, Hiatal or Reflux Esophagitis-Stage 1            | 0.4054  | 0.0335 |
| 31 | Hernia, Hiatal or Reflux Esophagitis-Stage 2 or 3       | 0.3879  | 0.3142 |
| 32 | Neoplasm, Malignant: Colon and Rectum-Stage 2           | -0.3750 | 0.1667 |
| 33 | Neoplasm, Malignant: Colon and Rectum-Stage 3           | 0.1798  | 0.4389 |
| 34 | Neoplasm, Malignant: Stomach-Stage 1                    | 0.3938  | 0.2408 |
| 35 | Neoplasm, Malignant: Stomach-Stage 3                    | 0.5800  | 0.1449 |
| 36 | Calculus of the Urinary Tract-Stage 2 or 3              | 0.2830  | 0.3339 |
| 37 | Neoplasm, Malignant: Bladder, Urinary-Stage 3           | 0.8356  | 0.0617 |
| 38 | Neoplasm, Malignant: Kidneys-Stage 3                    | 0.9161  | 0.0054 |
| 39 | Renal Failure-Stage 2 or 3                              | 0.2518  | 0.0215 |
| 40 | Anemia: Aplastic, Acquired-Stage 2 or 3                 | 0.3357  | 0.2123 |
| 41 | Neoplasm, Malignant Hematologic-Stage 2                 | -0.4371 | 0.1590 |
| 42 | Neoplasm, Malignant Hematologic-Stage 3                 | -0.8421 | 0.0510 |
| 43 | Cholecystitis and Cholelithiasis-Stage 1                | 0.1946  | 0.3670 |
| 44 | Cholecystitis and Cholelithiasis-Stage 2                | 0.7374  | 0.0003 |
| 45 | Cirrhosis of the Liver-Stage 2 or 3                     | 0.6437  | <.0001 |
| 46 | Neoplasm, Malignant: Pancreas-Stage 1                   | 1.1672  | 0.0009 |
| 47 |                                                         |         |        |
| 48 |                                                         |         |        |
| 49 |                                                         |         |        |
| 50 |                                                         |         |        |
| 51 |                                                         |         |        |
| 52 |                                                         |         |        |
| 53 |                                                         |         |        |
| 54 |                                                         |         |        |
| 55 |                                                         |         |        |
| 56 |                                                         |         |        |
| 57 |                                                         |         |        |
| 58 |                                                         |         |        |
| 59 |                                                         |         |        |
| 60 |                                                         |         |        |

|    |                                                                 |         |        |
|----|-----------------------------------------------------------------|---------|--------|
| 1  |                                                                 |         |        |
| 2  |                                                                 |         |        |
| 3  | Neoplasm, Malignant: Pancreas-Stage 2 or 3                      | 0.4115  | 0.3686 |
| 4  | Pancreatitis-all stages                                         | 0.6998  | 0.0093 |
| 5  | Rheumatic Fever- Stage 2                                        | 0.2881  | 0.3795 |
| 6  | Rheumatic Fever- Stage 3                                        | 0.7440  | 0.2101 |
| 7  | Neoplasm, Malignant: Prostate-Stage 2                           | -0.9665 | 0.0008 |
| 8  | Progressive Systemic Sclerosis-Stage 1                          | 1.5792  | 0.0739 |
| 9  | Cerebrovascular Disease-Stage 3                                 | -0.3096 | 0.1750 |
| 10 | Dementia: Primary Degenerative (Alzheimer or Pick)-Stage 1      | 0.3701  | 0.2504 |
| 11 | Dementia: Primary Degenerative (Alzheimer or Pick)-Stage 2 or 3 | -0.8789 | 0.3960 |
| 12 | Bipolar Disorder - Major Depressive Episode-Stage 2 or 3        | 0.4031  | 0.3584 |
| 13 | Bipolar Disorder - Manic Episode-Stage 2                        | 0.3873  | 0.2024 |
| 14 | Depression-Stage 1 or 2                                         | -0.1959 | 0.3188 |
| 15 | Drug Abuse, Dependence, Intoxication: Alcohol-Stage 2 or 3      | 0.5678  | 0.0022 |
| 16 | Chronic Obstructive Pulmonary Disease-Stage 1 or 2              | 0.4929  | 0.0002 |
| 17 | Chronic Obstructive Pulmonary Disease-Stage 3                   | 0.7526  | 0.0053 |
| 18 | Neoplasm, Malignant: Lungs, Bronchi, or Mediastinum-Stage 1     | 0.4482  | 0.0104 |
| 19 | Neoplasm, Malignant: Lungs, Bronchi, or Mediastinum-Stage 3     | 0.7027  | 0.0037 |
| 20 | Pneumonia: Bacterial-Stage 1                                    | 0.4147  | 0.0065 |
| 21 | Pneumonia: Bacterial-Stage 2                                    | -1.0459 | 0.0841 |
| 22 | Any Cancer - Stage 1 (from hospital data)                       | 0.1447  | 0.3765 |
| 23 | Any Cancer - Stage 2 (from hospital data)                       | 0.4529  | 0.0235 |
| 24 | Any Cancer - Stage 3 (from hospital data)                       | 0.8561  | <.0001 |
| 25 | Any Cardiovascular Disease - Stage 1 (from hospital data)       | -0.1085 | 0.2067 |
| 26 | Any Cardiovascular - Stage 3 (from hospital data)               | 0.1646  | 0.0649 |
| 27 | Any Endocrine - Stage 2 (from hospital data)                    | 0.1840  | 0.0457 |
| 28 | Any Endocrine Disease - Stage 3 (from hospital data)            | 0.1092  | 0.4222 |
| 29 | Any Eye Disease - All stages (from hospital data)               | 0.1685  | 0.4757 |
| 30 | Any Gastrointestinal Disease - Stage 1 (from hospital data)     | -0.3016 | 0.0049 |
| 31 | Any Gastrointestinal Disease - Stage 2 (from hospital data)     | 0.2142  | 0.0818 |
| 32 | Any Genitourinary Disease - Stage 2 (from hospital data)        | 0.1929  | 0.4584 |
| 33 | Any Genitourinary Disease - Stage 3 (from hospital data)        | -0.3144 | 0.2654 |
| 34 | Any Male Genital System - All stages (from hospital data)       | -0.4482 | 0.0010 |
| 35 | Any Neurologic Disease - Stage 1 (from hospital data)           | 0.2517  | 0.1493 |
| 36 | Any Neurologic Disease - Stage 2 (from hospital data)           | 0.3684  | 0.0263 |
| 37 | Any Neurologic Disease - Stage 3 (from hospital data)           | 0.6947  | 0.0025 |
| 38 | Any Respiratory Disease - Stage 2 (from hospital data)          | 0.3146  | 0.0525 |
| 39 | Any Respiratory Disease - Stage 3 (from hospital data)          | 0.5118  | 0.0036 |
| 40 | Neoplasm, Malignant: Melanoma-Stage 2                           | -1.0279 | 0.1274 |
| 41 | Neoplasm, Malignant: Melanoma-Stage 3                           | 0.8045  | 0.0919 |
| 42 | Cancer (from any data source)                                   | -0.5680 | <.0001 |
| 43 | Cancer (from drug prescription)                                 | 0.7548  | <.0001 |
| 44 | Cardiovascular Disease (from drug prescriptions)                | -0.2032 | 0.0068 |
| 45 | Eye Disease (from drug prescriptions)                           | 0.4930  | 0.0727 |
| 46 | Gastrointestinal Disease (from drug prescriptions)              | 0.2771  | 0.0301 |
| 47 |                                                                 |         |        |
| 48 |                                                                 |         |        |
| 49 |                                                                 |         |        |
| 50 |                                                                 |         |        |
| 51 |                                                                 |         |        |
| 52 |                                                                 |         |        |
| 53 |                                                                 |         |        |
| 54 |                                                                 |         |        |
| 55 |                                                                 |         |        |
| 56 |                                                                 |         |        |
| 57 |                                                                 |         |        |
| 58 |                                                                 |         |        |
| 59 |                                                                 |         |        |
| 60 |                                                                 |         |        |

|    |                                                                         |         |        |
|----|-------------------------------------------------------------------------|---------|--------|
| 1  |                                                                         |         |        |
| 2  |                                                                         |         |        |
| 3  | Genitourinary Disease (from drug prescriptions)                         | 0.5082  | 0.0008 |
| 4  | Hematologic Disease (from drug prescriptions)                           | 0.7320  | <.0001 |
| 5  | Hepatobiliary Disease (from drug prescriptions)                         | 0.7078  | <.0001 |
| 6  | Musculoskeletal Disease (from drug prescriptions)                       | 0.2658  | 0.0704 |
| 7  | Neurologic Diseases (from drug prescriptions)                           | -0.1106 | 0.4344 |
| 8  | Respiratory Disease (from drug prescriptions)                           | 0.3397  | 0.0140 |
| 9  | Skin Disease (from drug prescriptions)                                  | -0.8534 | 0.0737 |
| 10 | Day hospitalization                                                     | -0.3167 | 0.0005 |
| 11 | Number of day hospitalizations                                          | 0.1936  | 0.0009 |
| 12 | Oral anti-coagulants                                                    | 0.2097  | 0.0073 |
| 13 | Alpha-blockers                                                          | -0.0815 | 0.1273 |
| 14 | Statins                                                                 | -0.1195 | 0.0067 |
| 15 | Beta-blockers                                                           | 0.0758  | 0.0200 |
| 16 | ACE/ARB                                                                 | -0.1067 | 0.0015 |
| 17 | Anti-platelets                                                          | 0.2416  | <.0001 |
| 18 | Anti-arrhythmics                                                        | 0.2796  | <.0001 |
| 19 | Nitrates                                                                | 0.3750  | <.0001 |
| 20 | Diuretics                                                               | 0.1841  | <.0001 |
| 21 | Ear,Nose,Throat Disease (from any data source)                          | -0.4299 | 0.0218 |
| 22 | Total number of ER visits                                               | 0.1667  | <.0001 |
| 23 | Eye Disease (from any data source)                                      | -0.5605 | 0.0459 |
| 24 | Gastrointestinal Disease (from any data source)                         | -0.2670 | 0.0340 |
| 25 | Genitourinary Disease (from any data source)                            | -0.2029 | 0.0436 |
| 26 | Hematologic Disease (from any data source)                              | -0.2489 | 0.0209 |
| 27 | History of Endocrine Disease (from drug prescriptions) *                | 0.1446  | 0.0036 |
| 28 | History of Neurological Disease (from drug prescriptions) *             | 0.1136  | 0.0491 |
| 29 | History of Aortic Stenosis-Stage 1 *                                    | 0.1778  | 0.2745 |
| 30 | History of Aortic Stenosis-Stage 3 *                                    | -0.3400 | 0.2752 |
| 31 | History of Arrhythmias-Stage 2 *                                        | 0.1806  | 0.0180 |
| 32 | History of Cardiomyopathies-Stage 2 *                                   | 0.2800  | 0.0099 |
| 33 | History of Cardiomyopathies-Stage 3 *                                   | 0.2745  | 0.0450 |
| 34 | History of Congestive Heart Failure-Stage 3 *                           | 0.3791  | 0.0032 |
| 35 | History of Coronary Artery Disease-Stage 1 *                            | 0.2123  | <.0001 |
| 36 | History of Coronary Artery Disease-Stage 2 *                            | 0.2602  | 0.0002 |
| 37 | History of Coronary Artery Disease-Stage 3 *                            | 0.1210  | 0.0479 |
| 38 | History of Essential Hypertension-Stage 3 *                             | 0.1309  | 0.1997 |
| 39 | History of Mitral Stenosis-Stage 2 *                                    | 0.1638  | 0.4910 |
| 40 | History of Pericarditis: Chronic-Stage 2 or 3 *                         | -0.6191 | 0.0980 |
| 41 | History of Thrombophlebitis-Stage 2 or 3 *                              | 0.2574  | 0.0966 |
| 42 | History of Tibial/Iliac/Femoral/Popliteal Artery Disease-Stage 2 or 3 * | 0.3798  | 0.0282 |
| 43 | History of Diabetes Mellitus Type 1 or Type 2-Stage 1 *                 | 0.0741  | 0.1711 |
| 44 | History of Diabetes Mellitus Type 1 or Type 2-Stage 2 *                 | 0.2216  | 0.0034 |
| 45 | History of Diabetes Mellitus Type 1 or Type 2-Stage 3 *                 | 0.2666  | 0.0234 |
| 46 |                                                                         |         |        |
| 47 |                                                                         |         |        |
| 48 |                                                                         |         |        |
| 49 |                                                                         |         |        |
| 50 |                                                                         |         |        |
| 51 |                                                                         |         |        |
| 52 |                                                                         |         |        |
| 53 |                                                                         |         |        |
| 54 |                                                                         |         |        |
| 55 |                                                                         |         |        |
| 56 |                                                                         |         |        |
| 57 |                                                                         |         |        |
| 58 |                                                                         |         |        |
| 59 |                                                                         |         |        |
| 60 |                                                                         |         |        |

|    |                                                                                  |         |        |
|----|----------------------------------------------------------------------------------|---------|--------|
| 1  |                                                                                  |         |        |
| 2  |                                                                                  |         |        |
| 3  | History of Hypothyroidism-Stage 1 *                                              | -0.1031 | 0.4735 |
| 4  | History of Crohns Disease-Stage 2 or 3 *                                         | 0.5055  | 0.1168 |
| 5  | History of Diverticular Disease-Stage 1 *                                        | 0.1351  | 0.3093 |
| 6  | History of Diverticular Disease-Stage 2 or 3 *                                   | 0.3463  | 0.1463 |
| 7  | History of Neoplasm, Malignant: Colon and Rectum-Stage 3 *                       | 0.6400  | 0.0005 |
| 8  | History of Neoplasm, Malignant: Stomach-Stage 1 *                                | 0.7035  | 0.0151 |
| 9  | History of Neoplasm, Malignant: Stomach-Stage 3 *                                | 0.7735  | 0.0405 |
| 10 | History of Ulcerative Colitis-any stage *                                        | 0.1614  | 0.4858 |
| 11 | History of Calculus of the Urinary Tract-Stage 1 *                               | 0.1264  | 0.1702 |
| 12 | History of Calculus of the Urinary Tract-Stage 2 or 3 *                          | 0.3105  | 0.0119 |
| 13 | History of Neoplasm, Malignant: Kidneys-Stage 1 *                                | -0.3428 | 0.0948 |
| 14 | History of Renal Failure-Stage 2 or 3 *                                          | 0.3768  | <.0001 |
| 15 | History of Anemia: Aplastic, Acquired-Stage 2 or 3 *                             | 0.4850  | 0.0332 |
| 16 | History of Neoplasm, Malignant Hematologic-Stage 1 *                             | 0.2115  | 0.1691 |
| 17 | History of Neoplasm, Malignant Hematologic-Stage 2 *                             | 0.2152  | 0.3377 |
| 18 | History of Neoplasm, Malignant Hematologic-Stage 2 *                             | -0.5625 | 0.1068 |
| 19 | History of Cholecystitis and Cholelithiasis-Stage 1 *                            | 0.3497  | 0.0041 |
| 20 | History of Cholecystitis and Cholelithiasis-Stage 3 *                            | 0.1889  | 0.4655 |
| 21 | History of Cirrhosis of the Liver-Stage 2 or 3 *                                 | 0.3937  | <.0001 |
| 22 | History of Neoplasm, Malignant: Pancreas-Stage 1 *                               | 0.3556  | 0.3596 |
| 23 | History of Neoplasm, Malignant: Pancreas-Stage 2 or 3 *                          | -0.7080 | 0.2534 |
| 24 | History of Pancreatitis-any stage *                                              | 0.5502  | 0.0003 |
| 25 | History of Rheumatic Fever-Stage 3 *                                             | 0.6045  | 0.2213 |
| 26 | History of Neoplasm, Malignant: Prostate-Stage 2 *                               | -0.3042 | 0.0181 |
| 27 | History of Progressive Systemic Sclerosis-Stage 1 *                              | -1.8861 | 0.1260 |
| 28 | History of Progressive Systemic Sclerosis-Stage 2 or 3 *                         | 1.2042  | 0.1939 |
| 29 | History of Cerebrovascular Disease-Stage 1 *                                     | 0.1150  | 0.3529 |
| 30 | History of Cerebrovascular Disease-Stage 2 *                                     | 0.1580  | 0.0735 |
| 31 | History of Cerebrovascular Disease-Stage 3 *                                     | 0.2798  | 0.0003 |
| 32 | History of Dementia: Primary Degenerative (Alzheimer or Pick)-<br>Stage 1 *      | 0.5172  | 0.0355 |
| 33 | History of Dementia: Primary Degenerative (Alzheimer or Pick)-<br>Stage 2 or 3 * | 0.9102  | 0.1461 |
| 34 | History of Obesity-Stage 2 or 3 *                                                | 0.2153  | 0.0147 |
| 35 | History of polypharmacy *                                                        | 0.1251  | 0.0003 |
| 36 | History of Bipolar Disorder - Manic Episode-Stage 2 *                            | 0.4806  | 0.0162 |
| 37 | History of Depression-Stage 1 or 2 *                                             | 0.4028  | <.0001 |
| 38 | History of Drug Abuse, Dependence, Intoxication: Alcohol-Stage 1<br>*            | 0.3627  | 0.009  |
| 39 | History of Drug Abuse, Dependence, Intoxication: Alcohol-Stage 2<br>or 3 *       | 0.6949  | <.0001 |
| 40 | History of Chronic Obstructive Pulmonary Disease-Stage 1 or 2 *                  | 0.3625  | <.0001 |
| 41 | History of Chronic Obstructive Pulmonary Disease-Stage 3 *                       | 0.9574  | <.0001 |
| 42 | History of Neoplasm, Malignant: Lungs, Bronchi, or Mediastinum-<br>Stage 1 *     | 0.1444  | 0.4290 |
| 43 |                                                                                  |         |        |
| 44 |                                                                                  |         |        |
| 45 |                                                                                  |         |        |
| 46 |                                                                                  |         |        |
| 47 |                                                                                  |         |        |
| 48 |                                                                                  |         |        |
| 49 |                                                                                  |         |        |
| 50 |                                                                                  |         |        |
| 51 |                                                                                  |         |        |
| 52 |                                                                                  |         |        |
| 53 |                                                                                  |         |        |
| 54 |                                                                                  |         |        |
| 55 |                                                                                  |         |        |
| 56 |                                                                                  |         |        |
| 57 |                                                                                  |         |        |
| 58 |                                                                                  |         |        |
| 59 |                                                                                  |         |        |
| 60 |                                                                                  |         |        |

|    |                                                                 |         |        |
|----|-----------------------------------------------------------------|---------|--------|
| 1  |                                                                 |         |        |
| 2  |                                                                 |         |        |
| 3  | History of Neoplasm, Malignant: Lungs, Bronchi, or Mediastinum- | 0.3890  | 0.3220 |
| 4  | Stage 2 *                                                       |         |        |
| 5  | History of Neoplasm, Malignant: Lungs, Bronchi, or Mediastinum- | 0.7587  | 0.0080 |
| 6  | Stage 3 *                                                       |         |        |
| 7  | History of Pneumonia: Bacterial-Stage 2 *                       | -0.9199 | 0.0638 |
| 8  | History of Pneumonia: Bacterial-Stage 3 *                       | 0.4583  | 0.0128 |
| 9  | History of Neoplasm, Malignant: Melanoma-Stage 2 *              | 0.2292  | 0.4962 |
| 10 | History of Neoplasm, Malignant: Melanoma-Stage 3 *              | 0.6301  | 0.2916 |
| 11 | History of Oral Anti-coagulants *                               | 0.0666  | 0.3850 |
| 12 | History of Other Cardiovascular drugs *                         | 0.0303  | 0.4200 |
| 13 | History of Statins *                                            | 0.0592  | 0.1378 |
| 14 | Immunologic Disease (from any data source)                      | 0.2942  | 0.1479 |
| 15 | Male Genital System (from any data source)                      | -0.1980 | 0.0015 |
| 16 | Musculoskeletal Disease (from any data source)                  | -0.3422 | 0.0208 |
| 17 | Neurologic Disease (from any data source)                       | 0.2313  | 0.1007 |
| 18 | Hospitalization                                                 | 0.2053  | 0.0038 |
| 19 | Number of hospitalizations                                      | 0.0291  | 0.2995 |
| 20 | Polypharmacy                                                    | 0.2601  | <.0001 |
| 21 | Psychological Disease (from any data source)                    | 0.1041  | 0.0984 |
| 22 | Respiratory Disease (from any data source)                      | -0.1691 | 0.2366 |
| 23 | Cancer (from hospital data)                                     | 0.2023  | 0.3581 |
| 24 | Cardiovascular Disease (from hospital data)                     | -0.0893 | 0.3710 |
| 25 | Hepatobiliary (from hospital data)                              | -0.6082 | <.0001 |
| 26 | Musculoskeletal Disease (from hospital data)                    | -0.4016 | 0.0016 |
| 27 | Neurologic Disease (from hospital data)                         | -0.6060 | 0.0072 |
| 28 | Psychological Disease (from hospital data)                      | -0.2465 | 0.1059 |
| 29 | Respiratory Disease (from hospital data)                        | -0.2243 | 0.1884 |
| 30 | Skin Disease (from hospital data)                               | -0.5825 | 0.2155 |
| 31 | Skin Disease (from any data source)                             | 0.6403  | 0.1830 |
| 32 | Any of the other 9 Cardiovascular drugs                         | 0.0866  | 0.1859 |
| 33 |                                                                 |         |        |
| 34 |                                                                 |         |        |
| 35 |                                                                 |         |        |
| 36 |                                                                 |         |        |
| 37 |                                                                 |         |        |
| 38 |                                                                 |         |        |
| 39 |                                                                 |         |        |
| 40 |                                                                 |         |        |
| 41 |                                                                 |         |        |
| 42 |                                                                 |         |        |
| 43 |                                                                 |         |        |
| 44 |                                                                 |         |        |
| 45 |                                                                 |         |        |
| 46 |                                                                 |         |        |
| 47 |                                                                 |         |        |
| 48 |                                                                 |         |        |
| 49 |                                                                 |         |        |
| 50 |                                                                 |         |        |
| 51 |                                                                 |         |        |
| 52 |                                                                 |         |        |
| 53 |                                                                 |         |        |
| 54 |                                                                 |         |        |
| 55 |                                                                 |         |        |
| 56 |                                                                 |         |        |
| 57 |                                                                 |         |        |
| 58 |                                                                 |         |        |
| 59 |                                                                 |         |        |
| 60 |                                                                 |         |        |

### Females 65-74

| Variable                                                      | Coefficient | p-value |
|---------------------------------------------------------------|-------------|---------|
| Intercept                                                     | -4.5504     | <.0001  |
| Number of Chronic Conditions (from any data source)=1         | 0.3294      | 0.0005  |
| Number of Chronic Conditions (from any data source)=2         | 0.7012      | <.0001  |
| Number of Chronic Conditions (from any data source)=3         | 1.0162      | <.0001  |
| Number of Chronic Conditions (from any data source)=4         | 1.2243      | <.0001  |
| Number of Chronic Conditions (from any data source)=5         | 1.3625      | <.0001  |
| Number of Chronic Conditions (from any data source)=6 or more | 1.5014      | <.0001  |
| Number of Chronic Conditions (from hospital data)=1           | 0.3904      | <.0001  |
| Number of Chronic Conditions (from hospital data)=2           | 0.4301      | <.0001  |
| Number of Chronic Conditions (from hospital data)=3           | 0.4970      | <.0001  |

|    |                                                                  |          |        |
|----|------------------------------------------------------------------|----------|--------|
| 1  |                                                                  |          |        |
| 2  |                                                                  |          |        |
| 3  | Number of Chronic Conditions (from hospital data)=4 or more      | 0.5908   | <.0001 |
| 4  | Number of Chronic Conditions (from home health prescription)=1   | 0.4758   | <.0001 |
| 5  | or more                                                          |          |        |
| 6  |                                                                  |          |        |
| 7  | Number of Chronic Conditions (from drug prescriptions)=1         | -0.1393  | 0.1297 |
| 8  | Number of Chronic Conditions (from drug prescriptions)=2         | -0.3041  | 0.0058 |
| 9  | Number of Chronic Conditions (from drug prescriptions)=3         | -0.3950  | 0.0024 |
| 10 | Number of Chronic Conditions (from drug prescriptions)=4         | -0.4051  | 0.0076 |
| 11 | Number of Chronic Conditions (from drug prescriptions)=5 or more | -0.4003  | 0.0256 |
| 12 | Age on 12 /31/ 2012                                              | -0.00012 | <.0001 |
| 13 | Cancer (from home health prescription)                           | 0.6069   | <.0001 |
| 14 | Cardiovascular Disease (from home health prescription)           | -0.2636  | 0.0301 |
| 15 | Blood Diseases (from home health prescription)                   | 0.6193   | 0.1479 |
| 16 | Neurologic Diseases (from home health prescription)              | 0.4376   | 0.0016 |
| 17 | Mental Disorders (from home health prescription)                 | -0.2879  | 0.1224 |
| 18 | Cancer (chemo or radiation )                                     | 0.1589   | 0.0714 |
| 19 | Aortic Stenosis-Stage 1                                          | 0.5120   | 0.0026 |
| 20 | Cardiomyopathies-Stage 3                                         | 0.8973   | 0.0003 |
| 21 | Congestive Heart Failure-Stage3                                  | 0.3086   | 0.0103 |
| 22 | Coronary Artery Disease-Stage 1                                  | -0.1015  | 0.2148 |
| 23 | Coronary Artery Disease-Stage 2                                  | 0.4617   | 0.0005 |
| 24 | Coronary Artery Disease-Stage 3                                  | 0.2471   | 0.0565 |
| 25 | Essential Hypertension-Stage 1                                   | -0.1363  | 0.0191 |
| 26 | Essential Hypertension-Stage 3                                   | 0.2124   | 0.0429 |
| 27 | Mitral Stenosis-Stage 1                                          | -0.4732  | 0.0120 |
| 28 | Thrombophlebitis-Stage 2 or 3                                    | 0.7060   | <.0001 |
| 29 | Tibial/Iliac/Femoral/Popliteal Artery Disease-Stage 1            | 0.3844   | 0.0228 |
| 30 | Tibial/Iliac/Femoral/Popliteal Artery Disease-Stage 2 or 3       | 0.8107   | 0.0004 |
| 31 | Diabetes Mellitus Type 1 or Type 2-Stage 3                       | -0.6668  | 0.0022 |
| 32 | Crohns Disease-Stage 2 or 3                                      | 0.7852   | 0.1300 |
| 33 | Hernia, Hiatal or Reflux Esophagitis-Stage 1                     | 0.1799   | 0.1780 |
| 34 | Neoplasm, Malignant: Stomach-Stage 3                             | 0.4943   | 0.1142 |
| 35 | Neoplasm, Malignant: Bladder, Urinary-Stage 3                    | 0.8348   | 0.0780 |
| 36 | Neoplasm, Malignant: Breast, Female-Stage 1                      | -0.7289  | <.0001 |
| 37 | Neoplasm, Malignant: Breast, Female-Stage 3                      | -0.2375  | 0.1392 |
| 38 | Anemia: Aplastic, Acquired-Stage 2 or 3                          | 0.2640   | 0.1999 |
| 39 | Neoplasm, Malignant Hematologic-Stage 1                          | 0.2313   | 0.1024 |
| 40 | Neoplasm, Malignant Hematologic-Stage 3                          | -1.0860  | 0.0017 |
| 41 | Cirrhosis of the Liver-Stage 2 or 3                              | 0.6134   | <.0001 |
| 42 | Neoplasm, Malignant: Pancreas-Stage 1                            | 0.7125   | 0.0116 |
| 43 | Neoplasm, Malignant: Pancreas-Stage 2 or 3                       | 1.7605   | <.0001 |
| 44 | Rheumatic Fever- Stage 2                                         | 0.3447   | 0.0706 |
| 45 | Cerebrovascular Disease-Stage 3                                  | -0.6890  | 0.0007 |
| 46 | Dementia: Primary Degenerative (Alzheimer or Pick)-Stage 2 or 3  | 0.3887   | 0.2397 |
| 47 | Bipolar Disorder - Major Depressive Episode-Stage 2 or 3         | -0.7551  | 0.1418 |
| 48 |                                                                  |          |        |
| 49 |                                                                  |          |        |
| 50 |                                                                  |          |        |
| 51 |                                                                  |          |        |
| 52 |                                                                  |          |        |
| 53 |                                                                  |          |        |
| 54 |                                                                  |          |        |
| 55 |                                                                  |          |        |
| 56 |                                                                  |          |        |
| 57 |                                                                  |          |        |
| 58 |                                                                  |          |        |
| 59 |                                                                  |          |        |
| 60 |                                                                  |          |        |

|    |                                                             |         |        |
|----|-------------------------------------------------------------|---------|--------|
| 1  |                                                             |         |        |
| 2  |                                                             |         |        |
| 3  | Bipolar Disorder - Manic Episode-Stage 2                    | 0.6386  | 0.0329 |
| 4  | Depression-Stage 1 or 2                                     | -0.1537 | 0.1428 |
| 5  | Drug Abuse, Dependence, Intoxication: Alcohol-Stage 1       | 1.4878  | 0.0036 |
| 6  | Chronic Obstructive Pulmonary Disease-Stage 1 or 2          | 0.1325  | 0.0980 |
| 7  | Chronic Obstructive Pulmonary Disease-Stage 3               | 0.5302  | 0.0063 |
| 8  | Neoplasm, Malignant: Lungs, Bronchi, or Mediastinum-Stage 1 | 0.5790  | 0.0005 |
| 9  | Neoplasm, Malignant: Lungs, Bronchi, or Mediastinum-Stage 2 | 0.6907  | 0.0477 |
| 10 | Neoplasm, Malignant: Lungs, Bronchi, or Mediastinum-Stage 3 | 0.7408  | 0.0003 |
| 11 | Any Cancer - Stage 1 (from hospital data)                   | 0.3101  | <.0001 |
| 12 | Any Cancer - Stage 3 (from hospital data)                   | 1.2060  | <.0001 |
| 13 | Any Endocrine Disease - Stage 3 (from hospital data)        | 0.4493  | 0.0062 |
| 14 | Any Eye Disease - All stages (from hospital data)           | -0.1582 | 0.1255 |
| 15 | Any Genitourinary Disease - Stage 2 (from hospital data)    | 0.3230  | 0.0655 |
| 16 | Any Genitourinary Disease - Stage 3 (from hospital data)    | -0.4009 | 0.1324 |
| 17 | Any Gynecologic Disease - Stage 2 or 3 (from hospital data) | -0.4173 | 0.0548 |
| 18 | Any Hepatobiliary Disease - Stage 1 (from hospital data)    | -0.3374 | 0.0002 |
| 19 | Any Hepatobiliary Disease - Stage 3 (from hospital data)    | 0.3881  | 0.1255 |
| 20 | Any Immunologic Disease - All stages (from hospital data)   | -0.5745 | 0.1396 |
| 21 | Any Infectious Disease - Stage 3 (from hospital data)       | 0.5105  | 0.0511 |
| 22 | Any Neurologic Disease - Stage 3 (from hospital data)       | 0.8526  | <.0001 |
| 23 | Any Psychologic Disease - Stage 2 (from hospital data)      | 0.3067  | 0.0376 |
| 24 | Any Psychologic Disease - Stage 3 (from hospital data)      | 0.6691  | 0.0261 |
| 25 | Any Respiratory Disease - Stage 3 (from hospital data)      | 0.1787  | 0.1601 |
| 26 | Any Skin Disease - Stage 1 (from hospital data)             | -0.2893 | 0.0063 |
| 27 | Cancer (from any data source)                               | -0.3239 | <.0001 |
| 28 | Cancer (from drug prescriptions)                            | 0.3190  | <.0001 |
| 29 | Cardiovascular Disease (from drug prescriptions)            | -0.3086 | <.0001 |
| 30 | Genitourinary Disease (from drug prescriptions)             | 0.6302  | <.0001 |
| 31 | Hematologic Disease (from drug prescriptions)               | 0.3673  | <.0001 |
| 32 | Hepatobiliary Disease (from drug prescriptions)             | 0.6321  | 0.0005 |
| 33 | Musculoskeletal Disease (from drug prescriptions)           | 0.1877  | 0.0283 |
| 34 | Respiratory Disease (from drug prescriptions)               | 0.1731  | <.0001 |
| 35 | Oral anti-coagulants                                        | 0.2036  | 0.0012 |
| 36 | Statins                                                     | -0.1126 | <.0001 |
| 37 | ACE/ARB                                                     | -0.1348 | <.0001 |
| 38 | Anti-platelets                                              | 0.1104  | 0.0002 |
| 39 | Anti-arrhythmics                                            | 0.0912  | 0.0986 |
| 40 | Digitalis glycosides                                        | 0.2082  | 0.0046 |
| 41 | Nitrates                                                    | 0.2180  | <.0001 |
| 42 | Diuretics                                                   | 0.0387  | 0.2255 |
| 43 | Endocrine Disease (from any data source)                    | -0.1114 | 0.0002 |
| 44 | Ear,Nose,Throat Disease (from any data source)              | -0.4077 | 0.0494 |
| 45 | Number of ER visits labeled 'Yellow'                        | -0.3525 | <.0001 |
| 46 | Total number of ER visits                                   | 0.5514  | <.0001 |
| 47 |                                                             |         |        |
| 48 |                                                             |         |        |
| 49 |                                                             |         |        |
| 50 |                                                             |         |        |
| 51 |                                                             |         |        |
| 52 |                                                             |         |        |
| 53 |                                                             |         |        |
| 54 |                                                             |         |        |
| 55 |                                                             |         |        |
| 56 |                                                             |         |        |
| 57 |                                                             |         |        |
| 58 |                                                             |         |        |
| 59 |                                                             |         |        |
| 60 |                                                             |         |        |

|    |                                                                                  |         |        |
|----|----------------------------------------------------------------------------------|---------|--------|
| 1  |                                                                                  |         |        |
| 2  |                                                                                  |         |        |
| 3  | Eye Disease (from any data source)                                               | -0.2411 | <.0001 |
| 4  | Gastrointestinal Disease (from any data source)                                  | -0.0917 | 0.0025 |
| 5  | Gynecologic Disease (from any data source)                                       | -0.4752 | <.0001 |
| 6  | History of Cancer (from drug prescriptions) *                                    | 0.1368  | 0.0038 |
| 7  | History of Neurological Disease (from drug prescriptions) *                      | 0.1374  | <.0001 |
| 8  | History of Aortic Stenosis-Stage 3 *                                             | 0.2156  | 0.1868 |
| 9  | History of Arrhythmias-Stage 2 *                                                 | 0.1567  | 0.0059 |
| 10 | History of Cardiomyopathies-Stage 2 *                                            | 0.4598  | 0.0002 |
| 11 | History of Congestive Heart Failure-Stage 3 *                                    | 0.2601  | 0.0033 |
| 12 | History of Coronary Artery Disease-Stage 1 *                                     | 0.1550  | 0.0040 |
| 13 | History of Coronary Artery Disease-Stage 2 *                                     | 0.1778  | 0.0271 |
| 14 | History of Coronary Artery Disease-Stage 3 *                                     | 0.2409  | 0.0019 |
| 15 | History of Essential Hypertension-Stage 2 *                                      | 0.1060  | 0.0526 |
| 16 | History of Essential Hypertension-Stage 3 *                                      | 0.1504  | 0.0375 |
| 17 | History of Mitral Stenosis-Stage 2 *                                             | -0.2678 | 0.0937 |
| 18 | History of Mitral Stenosis-Stage 3 *                                             | 0.3696  | 0.0337 |
| 19 | History of Diabetes Mellitus Type 1 or Type 2-Stage 1 *                          | 0.2128  | <.0001 |
| 20 | History of Diabetes Mellitus Type 1 or Type 2-Stage 2 *                          | 0.3147  | <.0001 |
| 21 | History of Diabetes Mellitus Type 1 or Type 2-Stage 3 *                          | 0.4937  | <.0001 |
| 22 | History of Crohns Disease-Stage 2 or 3 *                                         | 0.5581  | 0.0954 |
| 23 | History of Neoplasm, Malignant: Colon and Rectum-Stage 3 *                       | 0.4016  | 0.0044 |
| 24 | History of Neoplasm, Malignant: Stomach-Stage 3 *                                | 0.4353  | 0.1847 |
| 25 | History of Calculus of the Urinary Tract-Stage 1 *                               | 0.2185  | 0.0607 |
| 26 | History of Neoplasm, Malignant: Kidneys-Stage 3 *                                | -0.7174 | 0.1125 |
| 27 | History of Renal Failure-Stage 2 or 3 *                                          | 0.4347  | <.0001 |
| 28 | History of Neoplasm, Malignant: Breast, Female-Stage 1 *                         | -0.1897 | 0.0064 |
| 29 | History of Neoplasm, Malignant: Breast, Female-Stage 3 *                         | 0.2713  | 0.0494 |
| 30 | History of Neoplasm, Malignant: Ovaries-Stage 1 *                                | 0.4490  | 0.0239 |
| 31 | History of Neoplasm, Malignant Hematologic-Stage 2 *                             | 0.5429  | 0.0348 |
| 32 | History of Cholecystitis and Cholelithiasis-Stage 2 *                            | 0.1929  | 0.0880 |
| 33 | History of Cirrhosis of the Liver-Stage 2 or 3 *                                 | 0.3420  | <.0001 |
| 34 | History of Progressive Systemic Sclerosis-Stage 2 or 3 *                         | 0.7431  | <.0001 |
| 35 | History of Cerebrovascular Disease-Stage 1 *                                     | 0.2276  | 0.0043 |
| 36 | History of Cerebrovascular Disease-Stage 3 *                                     | 0.1967  | 0.0029 |
| 37 | History of Dementia: Primary Degenerative (Alzheimer or Pick)-<br>Stage 1 *      | 0.4871  | <.0001 |
| 38 | History of Dementia: Primary Degenerative (Alzheimer or Pick)-<br>Stage 2 or 3 * | 0.7255  | 0.0080 |
| 39 | History of Obesity-Stage 2 or 3 *                                                | 0.1359  | 0.0870 |
| 40 | History of polypharmacy *                                                        | 0.1622  | <.0001 |
| 41 | History of Bipolar Disorder - Major Depressive Episode-Stage 2 or<br>3 *         | 0.6969  | 0.0010 |
| 42 | History of Depression-Stage 1 or 2 *                                             | 0.1646  | 0.0034 |
| 43 | History of Drug Abuse, Dependence, Intoxication: Alcohol-Stage 1<br>*            | 0.8459  | 0.0008 |
| 44 |                                                                                  |         |        |
| 45 |                                                                                  |         |        |
| 46 |                                                                                  |         |        |
| 47 |                                                                                  |         |        |
| 48 |                                                                                  |         |        |
| 49 |                                                                                  |         |        |
| 50 |                                                                                  |         |        |
| 51 |                                                                                  |         |        |
| 52 |                                                                                  |         |        |
| 53 |                                                                                  |         |        |
| 54 |                                                                                  |         |        |
| 55 |                                                                                  |         |        |
| 56 |                                                                                  |         |        |
| 57 |                                                                                  |         |        |
| 58 |                                                                                  |         |        |
| 59 |                                                                                  |         |        |
| 60 |                                                                                  |         |        |



|                                                                          |         |        |
|--------------------------------------------------------------------------|---------|--------|
| History of Drug Abuse, Dependence, Intoxication: Alcohol-Stage 2 or 3 *  | 0.6589  | <.0001 |
| History of Chronic Obstructive Pulmonary Disease-Stage 1 or 2 *          | 0.4628  | <.0001 |
| History of Chronic Obstructive Pulmonary Disease-Stage 3 *               | 0.8534  | <.0001 |
| History of Neoplasm, Malignant: Lungs, Bronchi, or Mediastinum-Stage 1 * | 0.2386  | 0.1126 |
| History of Neoplasm, Malignant: Lungs, Bronchi, or Mediastinum-Stage 2 * | 0.6212  | 0.0971 |
| History of Pneumonia: Bacterial-Stage 2 *                                | 0.4624  | 0.1267 |
| History of Pneumonia: Bacterial-Stage 3 *                                | 0.4924  | 0.0003 |
| History of Neoplasm, Malignant: Melanoma-Stage 3 *                       | 0.8606  | 0.1231 |
| History of Oral Anti-coagulants *                                        | 0.2508  | <.0001 |
| History of Other Cardiovascular drugs *                                  | 0.1002  | 0.0015 |
| Musculoskeletal Disease (from any data source)                           | -0.3863 | <.0001 |
| Hospitalization                                                          | 0.2562  | <.0001 |
| Number of hospitalizations                                               | -0.0651 | 0.0068 |
| Polypharmacy                                                             | 0.2370  | <.0001 |
| Cardiovascular Disease (from hospital data)                              | -0.0957 | 0.1172 |
| Musculoskeletal Disease (from hospital data)                             | -0.2090 | 0.0016 |
| Any of the other 9 Cardiovascular drugs                                  | 0.0806  | 0.1274 |
| Number of the other 9 Cardiovascular drugs                               | 0.0425  | 0.0129 |

### Males 65-74

| Variable                                                               | Coefficient | p-value |
|------------------------------------------------------------------------|-------------|---------|
| Intercept                                                              | -4.0290     | <.0001  |
| Number of Chronic Conditions (from any data source)=1                  | 0.3090      | <.0001  |
| Number of Chronic Conditions (from any data source)=2                  | 0.4055      | <.0001  |
| Number of Chronic Conditions (from any data source)=3                  | 0.6026      | <.0001  |
| Number of Chronic Conditions (from any data source)=4                  | 0.7813      | <.0001  |
| Number of Chronic Conditions (from any data source)=5                  | 0.7088      | <.0001  |
| Number of Chronic Conditions (from any data source)=6 or more          | 0.8178      | <.0001  |
| Number of Chronic Conditions (from hospital data)=1                    | 0.2460      | <.0001  |
| Number of Chronic Conditions (from hospital data)=2                    | 0.3676      | <.0001  |
| Number of Chronic Conditions (from hospital data)=3                    | 0.3746      | <.0001  |
| Number of Chronic Conditions (from hospital data)=4 or more            | 0.4616      | <.0001  |
| Number of Chronic Conditions (from home health prescription)=1 or more | 0.7247      | <.0001  |
| Number of Chronic Conditions (from drug prescriptions)=1               | -0.0302     | 0.6751  |
| Number of Chronic Conditions (from drug prescriptions)=2               | 0.0804      | 0.3543  |
| Number of Chronic Conditions (from drug prescriptions)=3               | 0.0770      | 0.4505  |
| Number of Chronic Conditions (from drug prescriptions)=4               | 0.1604      | 0.1774  |
| Number of Chronic Conditions (from drug prescriptions)=5 or more       | 0.3823      | 0.0066  |
| Age on 12 /31/ 2012                                                    | -0.0001     | <.0001  |

|    |                                                             |         |        |
|----|-------------------------------------------------------------|---------|--------|
| 1  |                                                             |         |        |
| 2  |                                                             |         |        |
| 3  | Cardiovascular Disease (from home health prescription)      | -0.2088 | 0.0342 |
| 4  | Gastrointestinal Disease (from home health prescription)    | -0.9964 | 0.0117 |
| 5  | Cancer (chemo or radiation )                                | 0.4296  | <.0001 |
| 6  | Cardiomyopathies-Stage 3                                    | 0.5047  | 0.0007 |
| 7  | Coronary Artery Disease-Stage 2                             | 0.2966  | <.0001 |
| 8  | Coronary Artery Disease-Stage 3                             | 0.2001  | 0.0086 |
| 9  | Tibial/Iliac/Femoral/Popliteal Artery Disease-Stage 1       | 0.2752  | 0.0019 |
| 10 | Tibial/Iliac/Femoral/Popliteal Artery Disease-Stage 2 or 3  | 0.3313  | 0.0330 |
| 11 | Hyperthyroidism-Stage 1                                     | -0.8506 | 0.0059 |
| 12 | Hyperthyroidism-Stage 2 or 3                                | -0.8443 | 0.0397 |
| 13 | Hypothyroidism-Stage 1                                      | -0.4005 | 0.0102 |
| 14 | Diverticular Disease-Stage 1                                | 0.3805  | 0.0034 |
| 15 | Gastritis-Stage 1                                           | 0.2944  | 0.0367 |
| 16 | Hernia, Hiatal or Reflux Esophagitis-Stage 1                | 0.3404  | 0.0214 |
| 17 | Neoplasm, Malignant: Stomach-Stage 3                        | 0.6357  | 0.0021 |
| 18 | Neoplasm, Malignant: Bladder, Urinary-Stage 1               | -0.3858 | 0.0003 |
| 19 | Neoplasm, Malignant: Bladder, Urinary-Stage 3               | 1.0573  | 0.0003 |
| 20 | Renal Failure-Stage 2 or 3                                  | 0.2462  | 0.0001 |
| 21 | Cholecystitis and Cholelithiasis-Stage 2                    | 0.8383  | 0.0010 |
| 22 | Cirrhosis of the Liver-Stage 2 or 3                         | 0.5557  | <.0001 |
| 23 | Neoplasm, Malignant: Pancreas-Stage 1                       | 0.8289  | 0.0004 |
| 24 | Neoplasm, Malignant: Pancreas-Stage 2 or 3                  | 1.0295  | 0.0026 |
| 25 | Rheumatic Fever- Stage 2                                    | 0.4941  | 0.0138 |
| 26 | Rheumatic Fever- Stage 3                                    | 0.9219  | 0.0348 |
| 27 | Neoplasm, Malignant: Prostate-Stage 2                       | -0.5899 | <.0001 |
| 28 | Cerebrovascular Disease-Stage 1                             | 0.2014  | 0.0319 |
| 29 | Cerebrovascular Disease-Stage 3                             | -0.3785 | 0.0234 |
| 30 | Drug Abuse, Dependence, Intoxication: Alcohol-Stage 2 or 3  | 0.2581  | 0.1704 |
| 31 | Neoplasm, Malignant: Lungs, Bronchi, or Mediastinum-Stage 1 | 0.6623  | <.0001 |
| 32 | Neoplasm, Malignant: Lungs, Bronchi, or Mediastinum-Stage 2 | 1.0595  | <.0001 |
| 33 | Neoplasm, Malignant: Lungs, Bronchi, or Mediastinum-Stage 3 | 0.9074  | <.0001 |
| 34 | Pulmonary Embolism-Stage 3                                  | 0.5962  | 0.0059 |
| 35 | Any Cancer - Stage 1 (from hospital data)                   | 0.1424  | 0.1477 |
| 36 | Any Cancer - Stage 3 (from hospital data)                   | 0.9400  | <.0001 |
| 37 | Any Cardiovascular Disease - Stage 1 (from hospital data)   | -0.0869 | 0.0242 |
| 38 | Any Ear,Nose,Throat Disease - Stage 1 (from hospital data)  | -0.4741 | 0.0100 |
| 39 | Any Gastrointestinal Disease - Stage 1 (from hospital data) | -0.2854 | <.0001 |
| 40 | Any Hepatobiliary Disease - Stage 2 (from hospital data)    | -0.5419 | 0.0149 |
| 41 | Any Hepatobiliary Disease - Stage 3 (from hospital data)    | 0.4751  | 0.0179 |
| 42 | Any Immunologic Disease - All stages (from hospital data)   | 0.6987  | 0.0029 |
| 43 | Any Musculoskeletal Disease - Stage 1 (from hospital data)  | -0.2629 | <.0001 |
| 44 | Any Neurologic Disease - Stage 3 (from hospital data)       | 0.5546  | 0.0004 |
| 45 | Any Psychologic Disease - Stage 1 (from hospital data)      | -0.4107 | 0.0146 |
| 46 | Any Psychologic Disease - Stage 3 (from hospital data)      | -0.7275 | 0.0035 |
| 47 |                                                             |         |        |
| 48 |                                                             |         |        |
| 49 |                                                             |         |        |
| 50 |                                                             |         |        |
| 51 |                                                             |         |        |
| 52 |                                                             |         |        |
| 53 |                                                             |         |        |
| 54 |                                                             |         |        |
| 55 |                                                             |         |        |
| 56 |                                                             |         |        |
| 57 |                                                             |         |        |
| 58 |                                                             |         |        |
| 59 |                                                             |         |        |
| 60 |                                                             |         |        |

|    |                                                                             |         |        |
|----|-----------------------------------------------------------------------------|---------|--------|
| 1  |                                                                             |         |        |
| 2  |                                                                             |         |        |
| 3  | Any Respiratory Disease - Stage 3 (from hospital data)                      | 0.6359  | <.0001 |
| 4  | Cancer (from any data source)                                               | -0.3827 | <.0001 |
| 5  | Cancer (from drug prescriptions)                                            | 0.2794  | <.0001 |
| 6  | Cardiovascular Disease (from drug prescriptions)                            | -0.3439 | <.0001 |
| 7  | Eye Disease (from drug prescriptions)                                       | -0.3279 | <.0001 |
| 8  | Genitourinary Disease (from drug prescriptions)                             | 0.2042  | 0.0754 |
| 9  | Hepatobiliary Disease (from drug prescriptions)                             | 0.5858  | 0.0002 |
| 10 | Respiratory Disease (from drug prescriptions)                               | 0.1468  | <.0001 |
| 11 | Drug-Drug interactions                                                      | 0.1473  | 0.0128 |
| 12 | Oral anti-coagulants                                                        | 0.1161  | 0.0182 |
| 13 | Statins                                                                     | -0.1331 | <.0001 |
| 14 | Beta-blockers                                                               | 0.0499  | 0.0248 |
| 15 | ACE/ARB                                                                     | -0.0997 | <.0001 |
| 16 | Anti-platelets                                                              | 0.1992  | <.0001 |
| 17 | Anti-arrhythmics                                                            | 0.1064  | 0.0130 |
| 18 | Digitalis glycosides                                                        | 0.3471  | <.0001 |
| 19 | Nitrates                                                                    | 0.3349  | <.0001 |
| 20 | Diuretics                                                                   | 0.1464  | <.0001 |
| 21 | Total number of ER visits                                                   | 0.1632  | <.0001 |
| 22 | Gastrointestinal Disease (from any data source)                             | -0.1029 | <.0001 |
| 23 | Genitourinary Disease (from any data source)                                | 0.3139  | 0.0021 |
| 24 | History of Cancer (from drug prescriptions) *                               | 0.1477  | 0.0020 |
| 25 | History of Neurological Disease (from drug prescriptions) *                 | 0.1240  | 0.0001 |
| 26 | History of Cardiomyopathies-Stage 2 *                                       | 0.3116  | <.0001 |
| 27 | History of Cardiomyopathies-Stage 3 *                                       | 0.4397  | <.0001 |
| 28 | History of Congestive Heart Failure-Stage 3 *                               | 0.3374  | <.0001 |
| 29 | History of Coronary Artery Disease-Stage 1 *                                | 0.2568  | <.0001 |
| 30 | History of Essential Hypertension-Stage 2 *                                 | 0.1079  | 0.0140 |
| 31 | History of Diabetes Mellitus Type 1 or Type 2-Stage 1 *                     | 0.1006  | 0.0031 |
| 32 | History of Diabetes Mellitus Type 1 or Type 2-Stage 2 *                     | 0.1970  | 0.0001 |
| 33 | History of Neoplasm, Malignant: Colon and Rectum-Stage 3 *                  | 0.3887  | 0.0005 |
| 34 | History of Renal Failure-Stage 2 or 3 *                                     | 0.3301  | <.0001 |
| 35 | History of Cholecystitis and Cholelithiasis-Stage 1 *                       | 0.2586  | 0.0009 |
| 36 | History of Cirrhosis of the Liver-Stage 2 or 3 *                            | 0.3021  | <.0001 |
| 37 | History of Neoplasm, Malignant: Prostate-Stage 3 *                          | 0.3601  | 0.0252 |
| 38 | History of Cerebrovascular Disease-Stage 1 *                                | 0.1414  | 0.0309 |
| 39 | History of Cerebrovascular Disease-Stage 3 *                                | 0.2819  | <.0001 |
| 40 | History of Dementia: Primary Degenerative (Alzheimer or Pick)-<br>Stage 1 * | 0.6145  | <.0001 |
| 41 | History of polypharmacy *                                                   | 0.1051  | <.0001 |
| 42 | History of Bipolar Disorder - Manic Episode-Stage 1 *                       | 0.6800  | 0.0265 |
| 43 | History of Drug Abuse, Dependence, Intoxication: Alcohol-Stage 1<br>*       | 0.3941  | 0.0071 |
| 44 | History of Drug Abuse, Dependence, Intoxication: Alcohol-Stage 2<br>or 3 *  | 0.4235  | <.0001 |
| 45 |                                                                             |         |        |
| 46 |                                                                             |         |        |
| 47 |                                                                             |         |        |
| 48 |                                                                             |         |        |
| 49 |                                                                             |         |        |
| 50 |                                                                             |         |        |
| 51 |                                                                             |         |        |
| 52 |                                                                             |         |        |
| 53 |                                                                             |         |        |
| 54 |                                                                             |         |        |
| 55 |                                                                             |         |        |
| 56 |                                                                             |         |        |
| 57 |                                                                             |         |        |
| 58 |                                                                             |         |        |
| 59 |                                                                             |         |        |
| 60 |                                                                             |         |        |

|                                                                 |         |        |
|-----------------------------------------------------------------|---------|--------|
| History of Chronic Obstructive Pulmonary Disease-Stage 1 or 2 * | 0.3669  | <.0001 |
| History of Chronic Obstructive Pulmonary Disease-Stage 3 *      | 0.7646  | <.0001 |
| History of Pneumonia: Bacterial-Stage 3 *                       | 0.3809  | 0.0002 |
| History of Oral Anti-coagulants *                               | 0.1253  | 0.0059 |
| History of Other Cardiovascular drugs *                         | 0.1019  | 0.0003 |
| Male Genital System (from any data source)                      | -0.3918 | <.0001 |
| Musculoskeletal Disease (from any data source)                  | -0.1502 | <.0001 |
| Hospitalization                                                 | 0.1762  | 0.0003 |
| Number of hospitalizations                                      | 0.0176  | 0.3845 |
| Polypharmacy                                                    | 0.2522  | <.0001 |
| Cancer (from hospital data)                                     | 0.3120  | 0.0130 |
| Genitourinary Disease (from hospital data)                      | -0.4713 | <.0001 |
| Psychological Disease (from hospital data)                      | 0.5748  | 0.0003 |

### Females 75-84

| Variable                                                               | Coefficient | p-value |
|------------------------------------------------------------------------|-------------|---------|
| Intercept                                                              | -2.1966     | 0.0983  |
| Number of Chronic Conditions (from any data source)=1                  | 0.3204      | <.0001  |
| Number of Chronic Conditions (from any data source)=2                  | 0.5216      | <.0001  |
| Number of Chronic Conditions (from any data source)=3                  | 0.6879      | <.0001  |
| Number of Chronic Conditions (from any data source)=4                  | 0.8108      | <.0001  |
| Number of Chronic Conditions (from any data source)=5                  | 0.8615      | <.0001  |
| Number of Chronic Conditions (from any data source)=6 or more          | 0.9003      | <.0001  |
| Number of Chronic Conditions (from hospital data)=1                    | 0.2734      | <.0001  |
| Number of Chronic Conditions (from hospital data)=2                    | 0.4760      | <.0001  |
| Number of Chronic Conditions (from hospital data)=3                    | 0.4602      | <.0001  |
| Number of Chronic Conditions (from hospital data)=4 or more            | 0.5605      | <.0001  |
| Number of Chronic Conditions (from home health prescription)=1         | 0.4539      | <.0001  |
| Number of Chronic Conditions (from home health prescription)=2 or more | 0.5024      | <.0001  |
| Number of Chronic Conditions (from drug prescriptions)=1               | -0.2927     | <.0001  |
| Number of Chronic Conditions (from drug prescriptions)=2               | -0.4346     | <.0001  |
| Number of Chronic Conditions (from drug prescriptions)=3               | -0.5230     | <.0001  |
| Number of Chronic Conditions (from drug prescriptions)=4               | -0.5943     | <.0001  |
| Number of Chronic Conditions (from drug prescriptions)=5 or more       | -0.6388     | <.0001  |
| Age on 12/ 31/ 2012                                                    | -0.0494     | 0.0537  |
| Cancer (from home health prescription)                                 | 0.5074      | <.0001  |
| Cardiovascular Disease (from home health prescription)                 | -0.1174     | 0.0117  |
| Respiratory Diseases (from home health prescription)                   | 0.4899      | <.0001  |
| Cancer (chemo or radiation )                                           | 0.3093      | 0.0003  |
| Genitourinary (dialysis)                                               | 0.3668      | 0.0018  |
| Aneurysm, Thoracic-all stages                                          | 0.4180      | 0.0286  |

|    |                                                                 |         |        |
|----|-----------------------------------------------------------------|---------|--------|
| 1  |                                                                 |         |        |
| 2  |                                                                 |         |        |
| 3  | Aortic Stenosis-Stage 1                                         | 0.2859  | 0.0055 |
| 4  | Arrhythmias-Stage 3                                             | -0.4014 | 0.0049 |
| 5  | Coronary Artery Disease-Stage 2                                 | 0.3630  | <.0001 |
| 6  | Essential Hypertension-Stage 3                                  | -0.1678 | 0.0129 |
| 7  | Mitral Stenosis-Stage 2                                         | -0.3215 | 0.0749 |
| 8  | Thrombophlebitis-Stage 1                                        | 0.3956  | 0.0024 |
| 9  | Thrombophlebitis-Stage 2 or 3                                   | -0.3711 | 0.0013 |
| 10 | Hyperthyroidism-Stage 1                                         | -0.3290 | 0.0847 |
| 11 | Crohn's Disease-Stage 1                                         | 0.7565  | 0.0329 |
| 12 | Functional Digestive Disorders-Stage 1                          | 0.2509  | 0.0124 |
| 13 | Gastritis-Stage 1                                               | 0.3782  | 0.0002 |
| 14 | Neoplasm, Malignant: Kidneys-Stage 3                            | -0.7235 | 0.1071 |
| 15 | Renal Failure-Stage 2 or 3                                      | 0.2070  | 0.0002 |
| 16 | Neoplasm, Malignant: Breast, Female-Stage 1                     | -0.3991 | 0.0001 |
| 17 | Neoplasm, Malignant: Breast, Female-Stage 3                     | -0.4149 | 0.0077 |
| 18 | Neoplasm, Malignant: Ovaries-Stage 1                            | 0.5296  | 0.0693 |
| 19 | Anemia: Aplastic, Acquired-Stage 2 or 3                         | 0.3538  | 0.0227 |
| 20 | Cirrhosis of the Liver-Stage 2 or 3                             | 0.6150  | <.0001 |
| 21 | Neoplasm, Malignant: Pancreas-Stage 1                           | 0.8098  | 0.0011 |
| 22 | Neoplasm, Malignant: Pancreas-Stage 2 or 3                      | 0.7321  | 0.0866 |
| 23 | Progressive Systemic Sclerosis-Stage 1                          | 0.5340  | 0.0203 |
| 24 | Cerebrovascular Disease-Stage 1                                 | 0.1406  | 0.0941 |
| 25 | Dementia: Primary Degenerative (Alzheimer or Pick)-Stage 1      | 0.3594  | <.0001 |
| 26 | Dementia: Primary Degenerative (Alzheimer or Pick)-Stage 2 or 3 | 0.2377  | 0.0716 |
| 27 | Bipolar Disorder - Manic Episode-Stage 1                        | -0.9145 | 0.1201 |
| 28 | Chronic Obstructive Pulmonary Disease-Stage 1 or 2              | 0.2567  | 0.0037 |
| 29 | Neoplasm, Malignant: Lungs, Bronchi, or Mediastinum-Stage 1     | 0.5431  | 0.0015 |
| 30 | Neoplasm, Malignant: Lungs, Bronchi, or Mediastinum-Stage 2     | 0.9029  | 0.0394 |
| 31 | Pneumonia: Bacterial-Stage 1                                    | 0.3367  | 0.0003 |
| 32 | Pneumonia: Bacterial-Stage 3                                    | -0.3613 | 0.0110 |
| 33 | Pulmonary Embolism-Stage 3                                      | -0.3302 | 0.0333 |
| 34 | Any Cancer - Stage 1 (from hospital data)                       | 0.2294  | 0.0003 |
| 35 | Any Cancer - Stage 2 (from hospital data)                       | 0.1477  | 0.1008 |
| 36 | Any Cancer - Stage 3 (from hospital data)                       | 1.3077  | <.0001 |
| 37 | Any Cardiovascular Disease - Stage 1 (from hospital data)       | -0.1001 | 0.0026 |
| 38 | Any Cardiovascular - Stage 3 (from hospital data)               | 0.3030  | <.0001 |
| 39 | Any Eye Disease - All stages (from hospital data)               | -0.1491 | 0.0443 |
| 40 | Any Gastrointestinal Disease - Stage 1 (from hospital data)     | -0.2093 | <.0001 |
| 41 | Any Hematologic Disease - Stage 3 (from hospital data)          | 0.4744  | 0.0174 |
| 42 | Any Musculoskeletal Disease - Stage 1 (from hospital data)      | -0.1645 | <.0001 |
| 43 | Any Neurologic Disease - Stage 1 (from hospital data)           | -0.1809 | 0.0076 |
| 44 | Any Neurologic Disease - Stage 3 (from hospital data)           | 0.3131  | <.0001 |
| 45 | Any Psychologic Disease - Stage 1 (from hospital data)          | -0.2321 | 0.0008 |
| 46 | Any Respiratory Disease - Stage 1 (from hospital data)          | -0.1657 | 0.0476 |
| 47 |                                                                 |         |        |
| 48 |                                                                 |         |        |
| 49 |                                                                 |         |        |
| 50 |                                                                 |         |        |
| 51 |                                                                 |         |        |
| 52 |                                                                 |         |        |
| 53 |                                                                 |         |        |
| 54 |                                                                 |         |        |
| 55 |                                                                 |         |        |
| 56 |                                                                 |         |        |
| 57 |                                                                 |         |        |
| 58 |                                                                 |         |        |
| 59 |                                                                 |         |        |
| 60 |                                                                 |         |        |

|    |                                                              |         |        |
|----|--------------------------------------------------------------|---------|--------|
| 1  |                                                              |         |        |
| 2  |                                                              |         |        |
| 3  | Any Respiratory Disease - Stage 3 (from hospital data)       | 0.5038  | <.0001 |
| 4  | Cancer (from any data source)                                | -0.1228 | 0.0560 |
| 5  | Cancer (from drug prescriptions)                             | 0.2540  | <.0001 |
| 6  | Cardiovascular Disease (from drug prescriptions)             | -0.2097 | 0.0046 |
| 7  | Endocrine Disease (from drug prescriptions)                  | -0.0828 | 0.0222 |
| 8  | Genitourinary Disease (from drug prescriptions)              | 0.4347  | <.0001 |
| 9  | Hematologic Disease (from drug prescriptions)                | 0.1757  | 0.0011 |
| 10 | Hepatobiliary Disease (from drug prescriptions)              | 0.6510  | 0.0006 |
| 11 | Neurologic Diseases (from drug prescriptions)                | 0.1086  | 0.0014 |
| 12 | Respiratory Disease (from drug prescriptions)                | 0.1865  | <.0001 |
| 13 | Cardiovascular Disease (from any data source)                | -0.0770 | 0.2400 |
| 14 | Day hospitalization                                          | -0.1056 | 0.0250 |
| 15 | Oral anti-coagulants                                         | 0.1976  | <.0001 |
| 16 | Alpha-blockers                                               | -0.1014 | 0.0038 |
| 17 | Statins                                                      | -0.1832 | <.0001 |
| 18 | Beta-blockers                                                | -0.0628 | 0.0031 |
| 19 | ACE/ARB                                                      | -0.1956 | <.0001 |
| 20 | Calcium channel blockers                                     | -0.0715 | 0.0007 |
| 21 | Nitrates                                                     | 0.1676  | <.0001 |
| 22 | Number of ER visits labeled 'Red'                            | 0.2174  | <.0001 |
| 23 | Total number of ER visits                                    | 0.2167  | <.0001 |
| 24 | Eye Disease (from any data source)                           | -0.1462 | <.0001 |
| 25 | Gynecologic Disease (from any data source)                   | -0.4041 | <.0001 |
| 26 | History of Cancer (from drug prescriptions) *                | 0.1108  | 0.0048 |
| 27 | History of Endocrine Disease (from drug prescriptions) *     | 0.1042  | 0.0016 |
| 28 | History of Neurological Disease (from drug prescriptions) *  | 0.0915  | 0.0011 |
| 29 | History of Psychological Disease (from drug prescriptions) * | 0.0506  | 0.0295 |
| 30 | History of Respiratory Disease (from drug prescriptions) *   | 0.0905  | 0.0002 |
| 31 | History of Aortic Stenosis-Stage 3 *                         | 0.1616  | 0.0515 |
| 32 | History of Arrhythmias-Stage 2 *                             | 0.1000  | 0.0015 |
| 33 | History of Cardiomyopathies-Stage 2 *                        | 0.1681  | 0.0697 |
| 34 | History of Cardiomyopathies-Stage 3 *                        | 0.3151  | 0.0108 |
| 35 | History of Congestive Heart Failure-Stage 3 *                | 0.3407  | <.0001 |
| 36 | History of Coronary Artery Disease-Stage 1 *                 | 0.1753  | <.0001 |
| 37 | History of Coronary Artery Disease-Stage 2 *                 | 0.1517  | 0.0017 |
| 38 | History of Coronary Artery Disease-Stage 3 *                 | 0.1935  | <.0001 |
| 39 | History of Essential Hypertension-Stage 1 *                  | 0.0413  | 0.0434 |
| 40 | History of Diabetes Mellitus Type 1 or Type 2-Stage 1 *      | 0.1886  | <.0001 |
| 41 | History of Diabetes Mellitus Type 1 or Type 2-Stage 2 *      | 0.1483  | 0.0027 |
| 42 | History of Diabetes Mellitus Type 1 or Type 2-Stage 3 *      | 0.1335  | 0.0715 |
| 43 | History of Hypothyroidism-Stage 2 or 3 *                     | 0.1892  | 0.0534 |
| 44 | History of Diverticular Disease-Stage 2 or 3 *               | 0.1638  | 0.0572 |
| 45 | History of Neoplasm, Malignant: Stomach-Stage 3 *            | 0.7712  | 0.0010 |
| 46 | History of Neoplasm, Malignant: Bladder, Urinary-Stage 3 *   | 1.3084  | 0.0182 |
| 47 |                                                              |         |        |
| 48 |                                                              |         |        |
| 49 |                                                              |         |        |
| 50 |                                                              |         |        |
| 51 |                                                              |         |        |
| 52 |                                                              |         |        |
| 53 |                                                              |         |        |
| 54 |                                                              |         |        |
| 55 |                                                              |         |        |
| 56 |                                                              |         |        |
| 57 |                                                              |         |        |
| 58 |                                                              |         |        |
| 59 |                                                              |         |        |
| 60 |                                                              |         |        |

|    |                                                                 |         |        |
|----|-----------------------------------------------------------------|---------|--------|
| 1  |                                                                 |         |        |
| 2  |                                                                 |         |        |
| 3  | History of Neoplasm, Malignant: Kidneys-Stage 3 *               | 0.7219  | 0.0444 |
| 4  | History of Renal Failure-Stage 2 or 3 *                         | 0.2398  | <.0001 |
| 5  |                                                                 |         |        |
| 6  | History of Neoplasm, Malignant: Breast, Female-Stage 1 *        | -0.2279 | 0.0002 |
| 7  | History of Neoplasm, Malignant: Breast, Female-Stage 3 *        | 0.3479  | 0.0056 |
| 8  | History of Neoplasm, Malignant: Ovaries-Stage 1 *               | 0.3945  | 0.0551 |
| 9  |                                                                 |         |        |
| 10 | History of Neoplasm, Malignant: Ovaries-Stage 2 or 3 *          | 0.4745  | 0.0314 |
| 11 | History of Anemia: Aplastic, Acquired-Stage 2 or 3 *            | 0.2900  | 0.0103 |
| 12 | History of Neoplasm, Malignant Hematologic-Stage 2 *            | -0.4900 | 0.0545 |
| 13 | History of Cholecystitis and Cholelithiasis-Stage 1 *           | 0.1010  | 0.0831 |
| 14 | History of Cholecystitis and Cholelithiasis-Stage 2 *           | 0.1793  | 0.0089 |
| 15 | History of Cholecystitis and Cholelithiasis-Stage 3 *           | 0.2803  | 0.0315 |
| 16 |                                                                 |         |        |
| 17 | History of Cirrhosis of the Liver-Stage 2 or 3 *                | 0.2739  | <.0001 |
| 18 | History of Rheumatic Fever-Stage 3 *                            | 0.4281  | 0.0005 |
| 19 |                                                                 |         |        |
| 20 | History of Progressive Systemic Sclerosis-Stage 1 *             | 0.4962  | 0.0004 |
| 21 | History of Cerebrovascular Disease-Stage 1 *                    | 0.1710  | <.0001 |
| 22 | History of Cerebrovascular Disease-Stage 2 *                    | 0.1318  | 0.0003 |
| 23 | History of Cerebrovascular Disease-Stage 3 *                    | 0.2019  | <.0001 |
| 24 | History of Dementia: Primary Degenerative (Alzheimer or Pick)-  |         |        |
| 25 | Stage 1 *                                                       | 0.3755  | <.0001 |
| 26 |                                                                 |         |        |
| 27 | History of Dementia: Primary Degenerative (Alzheimer or Pick)-  |         |        |
| 28 | Stage 2 or 3 *                                                  | 0.4162  | <.0001 |
| 29 | History of Obesity-Stage 2 or 3 *                               | 0.1187  | 0.1089 |
| 30 | History of polypharmacy *                                       | 0.1086  | <.0001 |
| 31 | History of Bipolar Disorder - Manic Episode-Stage 2 *           | 0.3557  | 0.0356 |
| 32 | History of Chronic Obstructive Pulmonary Disease-Stage 1 or 2 * | 0.2343  | <.0001 |
| 33 | History of Chronic Obstructive Pulmonary Disease-Stage 3 *      | 0.6055  | <.0001 |
| 34 | History of Neoplasm, Malignant: Lungs, Bronchi, or Mediastinum- |         |        |
| 35 | Stage 1 *                                                       | 0.3311  | 0.0150 |
| 36 |                                                                 |         |        |
| 37 | History of Pneumonia: Bacterial-Stage 3 *                       | 0.2981  | 0.0013 |
| 38 | History of Oral Anti-coagulants *                               | 0.1008  | 0.0057 |
| 39 | History of Other Cardiovascular drugs *                         | 0.1223  | <.0001 |
| 40 | Musculoskeletal Disease (from any data source)                  | -0.0624 | 0.0065 |
| 41 | Hospitalization                                                 | 0.1280  | 0.0248 |
| 42 | Number of hospitalizations                                      | -0.0643 | 0.0011 |
| 43 | Polypharmacy                                                    | 0.1500  | <.0001 |
| 44 | Psychological Disease (from any data source)                    | 0.1240  | <.0001 |
| 45 | Any of the other 9 Cardiovascular drugs                         | 0.0679  | 0.1160 |
| 46 | Number of the other 9 Cardiovascular drugs                      | 0.1028  | <.0001 |
| 47 |                                                                 |         |        |
| 48 |                                                                 |         |        |
| 49 |                                                                 |         |        |
| 50 |                                                                 |         |        |
| 51 |                                                                 |         |        |
| 52 |                                                                 |         |        |
| 53 |                                                                 |         |        |
| 54 |                                                                 |         |        |
| 55 |                                                                 |         |        |
| 56 |                                                                 |         |        |
| 57 |                                                                 |         |        |
| 58 |                                                                 |         |        |
| 59 |                                                                 |         |        |
| 60 |                                                                 |         |        |

## Males 75-84

| Variable                                              | Coefficient | p-value |
|-------------------------------------------------------|-------------|---------|
| Intercept                                             | -1.0190     | 0.4621  |
| Number of Chronic Conditions (from any data source)=1 | 0.2984      | 0.0003  |

|    |                                                                  |         |        |
|----|------------------------------------------------------------------|---------|--------|
| 1  |                                                                  |         |        |
| 2  |                                                                  |         |        |
| 3  |                                                                  |         |        |
| 4  | Number of Chronic Conditions (from any data source)=2            | 0.5009  | <.0001 |
| 5  | Number of Chronic Conditions (from any data source)=3            | 0.5987  | <.0001 |
| 6  | Number of Chronic Conditions (from any data source)=4            | 0.7284  | <.0001 |
| 7  | Number of Chronic Conditions (from any data source)=5            | 0.7507  | <.0001 |
| 8  | Number of Chronic Conditions (from any data source)=6 or more    | 0.8596  | <.0001 |
| 9  |                                                                  |         |        |
| 10 | Number of Chronic Conditions (from hospital data)=1              | 0.1570  | 0.0049 |
| 11 | Number of Chronic Conditions (from hospital data)=2              | 0.1638  | 0.0317 |
| 12 | Number of Chronic Conditions (from hospital data)=3              | 0.1457  | 0.1301 |
| 13 | Number of Chronic Conditions (from hospital data)=4 or more      | 0.2159  | 0.0857 |
| 14 |                                                                  |         |        |
| 15 | Number of Chronic Conditions (from home health prescription)=1   | 0.3898  | <.0001 |
| 16 | Number of Chronic Conditions (from home health prescription)=2   |         |        |
| 17 | or more                                                          | 0.2645  | 0.0832 |
| 18 |                                                                  |         |        |
| 19 | Number of Chronic Conditions (from drug prescriptions)=1         | -0.2228 | 0.0042 |
| 20 | Number of Chronic Conditions (from drug prescriptions)=2         | -0.2887 | 0.0012 |
| 21 | Number of Chronic Conditions (from drug prescriptions)=3         | -0.2736 | 0.0079 |
| 22 | Number of Chronic Conditions (from drug prescriptions)=4         | -0.3649 | 0.0023 |
| 23 | Number of Chronic Conditions (from drug prescriptions)=5 or more | -0.3187 | 0.0260 |
| 24 |                                                                  |         |        |
| 25 | Reside in Mountain area on 12/ 31/ 2012                          | -0.0273 | 0.4157 |
| 26 | Reside in Hill area on 12/ 31/ 2012                              | 0.0419  | 0.0161 |
| 27 | Age on 12/ 31/ 2012                                              | -0.0638 | 0.0170 |
| 28 |                                                                  |         |        |
| 29 | Cancer (from home health prescription)                           | 0.6146  | <.0001 |
| 30 | Genitourinary Disease (from home health prescription)            | -0.2349 | 0.2216 |
| 31 | Blood Diseases (from home health prescription)                   | 0.5082  | 0.1476 |
| 32 | Infectious Disease (from home health prescription)               | 0.3613  | 0.1489 |
| 33 | Neurologic Diseases (from home health prescription)              | 0.2858  | 0.0007 |
| 34 | Mental Disorders (from home health prescription)                 | 0.1399  | 0.1595 |
| 35 | Respiratory Diseases (from home health prescription)             | 0.1985  | 0.1585 |
| 36 | Cancer (chemo or radiation )                                     | 0.2160  | 0.0058 |
| 37 | Genitourinary (dialysis)                                         | 0.1829  | 0.1227 |
| 38 | Aneurysm, Thoracic-all stages                                    | -0.1892 | 0.2250 |
| 39 | Aortic Stenosis-Stage 1                                          | 0.1531  | 0.1625 |
| 40 | Aortic Stenosis-Stage 3                                          | 0.1564  | 0.2244 |
| 41 | Arrhythmias-Stage 2                                              | -0.1538 | 0.0208 |
| 42 | Cardiomyopathies-Stage 2                                         | -0.1466 | 0.2544 |
| 43 | Cardiomyopathies-Stage 3                                         | 0.3133  | 0.0224 |
| 44 | Conduction Disorders-all stages                                  | -0.1835 | 0.0881 |
| 45 | Congestive Heart Failure-Stage3                                  | 0.2137  | 0.0021 |
| 46 | Coronary Artery Disease-Stage 2                                  | 0.0566  | 0.4552 |
| 47 | Coronary Artery Disease-Stage 3                                  | 0.1414  | 0.0418 |
| 48 | Essential Hypertension-Stage 1                                   | -0.1169 | 0.0073 |
| 49 | Essential Hypertension-Stage 2                                   | -0.2785 | 0.0001 |
| 50 | Essential Hypertension-Stage 3                                   | 0.1298  | 0.0362 |
| 51 | Infective Endocarditis-Stage 3                                   | 0.9736  | 0.0197 |
| 52 |                                                                  |         |        |
| 53 |                                                                  |         |        |
| 54 |                                                                  |         |        |
| 55 |                                                                  |         |        |
| 56 |                                                                  |         |        |
| 57 |                                                                  |         |        |
| 58 |                                                                  |         |        |
| 59 |                                                                  |         |        |
| 60 |                                                                  |         |        |



1  
2  
3  
4  
5  
6  
7  
8  
9  
10  
11  
12  
13  
14  
15  
16  
17  
18  
19  
20  
21  
22  
23  
24  
25  
26  
27  
28  
29  
30  
31  
32  
33  
34  
35  
36  
37  
38  
39  
40  
41  
42  
43  
44  
45  
46  
47  
48  
49  
50  
51  
52  
53  
54  
55  
56  
57  
58  
59  
60

|                                                                 |         |        |
|-----------------------------------------------------------------|---------|--------|
| Mitral Stenosis-Stage 2                                         | -0.3114 | 0.1333 |
| Pericarditis: Viral or Traumatic-Stage 2 or 3                   | -0.8469 | 0.0349 |
| Thrombophlebitis-Stage 1                                        | 0.2275  | 0.1472 |
| Thrombophlebitis-Stage 2 or 3                                   | -0.1048 | 0.4208 |
| Tibial/Iliac/Femoral/Popliteal Artery Disease-Stage 1           | 0.1183  | 0.1409 |
| Tibial/Iliac/Femoral/Popliteal Artery Disease-Stage 2 or 3      | 0.1645  | 0.2385 |
| Diabetes Mellitus Type 1 or Type 2-Stage 2                      | -0.1939 | 0.0562 |
| Diabetes Mellitus Type 1 or Type 2-Stage 3                      | -0.4025 | 0.0333 |
| Hyperthyroidism-Stage 2 or 3                                    | -0.2385 | 0.4296 |
| Hypothyroidism-Stage 1                                          | -0.1541 | 0.2322 |
| Crohns Disease-Stage 1                                          | 0.8307  | 0.0454 |
| Functional Digestive Disorders-Stage 1                          | 0.1566  | 0.1709 |
| Hernia, Hiatal or Reflux Esophagitis-Stage 2 or 3               | 0.7272  | 0.0040 |
| Neoplasm, Malignant: Colon and Rectum-Stage 2                   | -0.4353 | 0.0125 |
| Neoplasm, Malignant: Colon and Rectum-Stage 3                   | -0.2956 | 0.1051 |
| Neoplasm, Malignant: Stomach-Stage 1                            | 0.5695  | 0.0019 |
| Neoplasm, Malignant: Stomach-Stage 3                            | 0.3811  | 0.1781 |
| Calculus of the Urinary Tract-Stage 1                           | -0.1383 | 0.3085 |
| Neoplasm, Malignant: Bladder, Urinary-Stage 3                   | 0.2547  | 0.4352 |
| Neoplasm, Malignant: Kidneys-Stage 1                            | 0.1778  | 0.2881 |
| Renal Failure-Stage 2 or 3                                      | 0.3215  | <.0001 |
| Anemia: Aplastic, Acquired-Stage 2 or 3                         | 0.2550  | 0.2048 |
| Neoplasm, Malignant Hematologic-Stage 1                         | 0.1501  | 0.1974 |
| Neoplasm, Malignant Hematologic-Stage 3                         | -0.8912 | 0.0050 |
| Cholecystitis and Cholelithiasis-Stage 2                        | 0.4441  | 0.0408 |
| Cirrhosis of the Liver-Stage 2 or 3                             | 0.5304  | <.0001 |
| Neoplasm, Malignant: Pancreas-Stage 1                           | 1.1048  | <.0001 |
| Neoplasm, Malignant: Pancreas-Stage 2 or 3                      | 1.2846  | 0.0009 |
| Rheumatic Fever- Stage 2                                        | 0.2675  | 0.0866 |
| Rheumatic Fever- Stage 3                                        | 0.2708  | 0.3136 |
| Neoplasm, Malignant: Prostate-Stage 2                           | -0.3625 | 0.0290 |
| Neoplasm, Malignant: Prostate-Stage 3                           | -0.2814 | 0.1619 |
| Progressive Systemic Sclerosis-Stage 1                          | 1.1059  | 0.1109 |
| Cerebrovascular Disease-Stage 1                                 | 0.1684  | 0.0636 |
| Cerebrovascular Disease-Stage 2                                 | -0.2728 | 0.0094 |
| Cerebrovascular Disease-Stage 3                                 | -0.2874 | 0.0742 |
| Dementia: Primary Degenerative (Alzheimer or Pick)-Stage 1      | 0.4422  | 0.0018 |
| Dementia: Primary Degenerative (Alzheimer or Pick)-Stage 2 or 3 | 0.7034  | 0.0002 |
| Epilepsy-all stages                                             | -0.3392 | 0.0337 |
| Bipolar Disorder - Manic Episode-Stage 1                        | 0.6002  | 0.4877 |
| Depression-Stage 1 or 2                                         | -0.1468 | 0.3176 |
| Drug Abuse, Dependence, Intoxication: Alcohol-Stage 1           | 1.2556  | 0.0028 |
| Drug Abuse, Dependence, Intoxication: Alcohol-Stage 2 or 3      | 0.1890  | 0.3351 |

|    |                                                             |         |        |
|----|-------------------------------------------------------------|---------|--------|
| 1  |                                                             |         |        |
| 2  |                                                             |         |        |
| 3  |                                                             |         |        |
| 4  | Chronic Obstructive Pulmonary Disease-Stage 1 or 2          | 0.0777  | 0.0884 |
| 5  | Chronic Obstructive Pulmonary Disease-Stage 3               | 0.1545  | 0.2047 |
| 6  | Neoplasm, Malignant: Lungs, Bronchi, or Mediastinum-Stage 1 | 0.7063  | <.0001 |
| 7  | Neoplasm, Malignant: Lungs, Bronchi, or Mediastinum-Stage 2 | 0.3644  | 0.2398 |
| 8  | Neoplasm, Malignant: Lungs, Bronchi, or Mediastinum-Stage 3 | 0.3851  | 0.0755 |
| 9  | Pulmonary Embolism-Stage 3                                  | -0.2243 | 0.2238 |
| 10 | Any Cancer - Stage 2 (from hospital data)                   | 0.4412  | 0.0019 |
| 11 | Any Cancer - Stage 3 (from hospital data)                   | 1.2233  | <.0001 |
| 12 | Any Cardiovascular Disease - Stage 1 (from hospital data)   | -0.0637 | 0.2223 |
| 13 | Any Cardiovascular Disease - Stage 2 (from hospital data)   | 0.1167  | 0.1053 |
| 14 | Any Endocrine Disease - Stage 1 (from hospital data)        | -0.1650 | 0.0986 |
| 15 | Any Endocrine Disease - Stage 3 (from hospital data)        | 0.3361  | 0.0522 |
| 16 | Any Ear,Nose,Throat Disease - Stage 1 (from hospital data)  | -0.3128 | 0.1174 |
| 17 | Any Ear,Nose,Throat Disease - Stage 2 (from hospital data)  | -1.4375 | 0.0217 |
| 18 | Any Eye Disease - All stages (from hospital data)           | -0.2230 | 0.0012 |
| 19 | Any Gastrointestinal Disease - Stage 1 (from hospital data) | -0.1736 | 0.0372 |
| 20 | Any Genitourinary Disease - Stage 1 (from hospital data)    | 0.2720  | 0.1932 |
| 21 | Any Genitourinary Disease - Stage 2 (from hospital data)    | 0.3593  | 0.0553 |
| 22 | Any Genitourinary Disease - Stage 3 (from hospital data)    | 0.4935  | 0.0195 |
| 23 | Any Hemotologic Disease - Stage 3 (from hospital data)      | 0.3202  | 0.1946 |
| 24 | Any Hepatobiliary Disease - Stage 2 (from hospital data)    | -0.4870 | 0.0127 |
| 25 | Any Immunologic Disease - All stages (from hospital data)   | 0.3766  | 0.3824 |
| 26 | Any Infectious Disease - Stage 3 (from hospital data)       | 0.2171  | 0.2273 |
| 27 | Any Male Genital System - All stages (from hospital data)   | -0.1061 | 0.0692 |
| 28 | Any Musculoskeletal Disease - Stage 1 (from hospital data)  | -0.1530 | 0.0217 |
| 29 | Any Neurologic Disease - Stage 1 (from hospital data)       | -0.1396 | 0.1837 |
| 30 | Any Neurologic Disease - Stage 2 (from hospital data)       | 0.2235  | 0.0339 |
| 31 | Any Neurologic Disease - Stage 3 (from hospital data)       | 0.3632  | 0.0284 |
| 32 | Any Psychologic Disease - Stage 1 (from hospital data)      | -0.2738 | 0.0487 |
| 33 | Any Psychologic Disease - Stage 3 (from hospital data)      | -0.3812 | 0.0297 |
| 34 | Any Respiratory Disease - Stage 2 (from hospital data)      | 0.2521  | 0.0012 |
| 35 | Any Respiratory Disease - Stage 3 (from hospital data)      | 0.4709  | <.0001 |
| 36 | Any Skin Disease - Stage 1 (from hospital data)             | -0.2014 | 0.1407 |
| 37 | Any Skin Disease - Stage 2 (from hospital data)             | -0.4164 | 0.0263 |
| 38 | Neoplasm, Malignant: Melanoma-Stage 2                       | -0.5839 | 0.1101 |
| 39 | Neoplasm, Malignant: Melanoma-Stage 3                       | 0.6833  | 0.1751 |
| 40 | Cancer (from drug prescriptions)                            | 0.1681  | <.0001 |
| 41 | Cardiovascular Disease (from drug prescriptions)            | -0.2349 | <.0001 |
| 42 | Endocrine Disease (from drug prescriptions)                 | -0.0963 | 0.2515 |
| 43 | Eye Disease (from drug prescriptions)                       | -0.1283 | <.0001 |
| 44 | Genitourinary Disease (from drug prescriptions)             | 0.4556  | <.0001 |
| 45 | Hematologic Disease (from drug prescriptions)               | 0.1419  | 0.0185 |
| 46 | Hepatobiliary Disease (from drug prescriptions)             | 0.5789  | 0.0029 |
| 47 |                                                             |         |        |
| 48 |                                                             |         |        |
| 49 |                                                             |         |        |
| 50 |                                                             |         |        |
| 51 |                                                             |         |        |
| 52 |                                                             |         |        |
| 53 |                                                             |         |        |
| 54 |                                                             |         |        |
| 55 |                                                             |         |        |
| 56 |                                                             |         |        |
| 57 |                                                             |         |        |
| 58 |                                                             |         |        |
| 59 |                                                             |         |        |
| 60 |                                                             |         |        |

|    |                                                                         |         |        |
|----|-------------------------------------------------------------------------|---------|--------|
| 1  |                                                                         |         |        |
| 2  |                                                                         |         |        |
| 3  |                                                                         |         |        |
| 4  | Musculoskeletal Disease (from drug prescriptions)                       | 0.0610  | 0.4251 |
| 5  | Neurologic Diseases (from drug prescriptions)                           | 0.0903  | 0.0217 |
| 6  | Psychological Disease (from drug prescriptions)                         | -0.0954 | 0.2745 |
| 7  | Respiratory Disease (from drug prescriptions)                           | 0.1867  | <.0001 |
| 8  | Skin Disease (from drug prescriptions)                                  | -0.3674 | 0.0144 |
| 9  | Number of day hospitalizations                                          | -0.0412 | 0.1517 |
| 10 | Oral anti-coagulants                                                    | 0.1213  | 0.0014 |
| 11 | Alpha-blockers                                                          | -0.0742 | 0.0360 |
| 12 | Statins                                                                 | -0.1293 | <.0001 |
| 13 | ACE/ARB                                                                 | -0.1708 | <.0001 |
| 14 | Anti-platelets                                                          | 0.0372  | 0.1632 |
| 15 | Calcium channel blockers                                                | -0.0590 | 0.0133 |
| 16 | Digitalis glycosides                                                    | 0.1134  | 0.0086 |
| 17 | Nitrates                                                                | 0.2066  | <.0001 |
| 18 | Diuretics                                                               | 0.0565  | 0.0325 |
| 19 | Endocrine Disease (from any data source)                                | 0.0742  | 0.3637 |
| 20 | Number of ER visits labeled 'Yellow'                                    | -0.1352 | 0.0027 |
| 21 | Total number of ER visits                                               | 0.3208  | <.0001 |
| 22 | Genitourinary Disease (from any data source)                            | 0.1205  | 0.3247 |
| 23 | History of Endocrine Disease (from drug prescriptions) *                | 0.0680  | 0.0589 |
| 24 | History of Neurological Disease (from drug prescriptions) *             | 0.0426  | 0.2080 |
| 25 | History of Psychological Disease (from drug prescriptions) *            | 0.0262  | 0.3867 |
| 26 | History of Respiratory Disease (from drug prescriptions) *              | 0.0918  | 0.0003 |
| 27 | History of Aortic Stenosis-Stage 1 *                                    | -0.1295 | 0.0581 |
| 28 | History of Aortic Stenosis-Stage 3 *                                    | 0.0889  | 0.2974 |
| 29 | History of Arrhythmias-Stage 2 *                                        | 0.0850  | 0.0061 |
| 30 | History of Arrhythmias-Stage 3 *                                        | 0.1402  | 0.0717 |
| 31 | History of Cardiomyopathies-Stage 2 *                                   | 0.1934  | 0.0028 |
| 32 | History of Cardiomyopathies-Stage 3 *                                   | 0.2510  | 0.0033 |
| 33 | History of Congestive Heart Failure-Stage 3 *                           | 0.2257  | <.0001 |
| 34 | History of Coronary Artery Disease-Stage 1 *                            | 0.1133  | <.0001 |
| 35 | History of Coronary Artery Disease-Stage 2 *                            | 0.1341  | 0.0004 |
| 36 | History of Coronary Artery Disease-Stage 3 *                            | 0.0377  | 0.3346 |
| 37 | History of Essential Hypertension-Stage 2 *                             | -0.0501 | 0.1298 |
| 38 | History of Essential Hypertension-Stage 3 *                             | 0.1584  | <.0001 |
| 39 | History of Infective Endocarditis-Stage 3 *                             | -0.3815 | 0.1951 |
| 40 | History of Mitral Stenosis-Stage 3 *                                    | 0.1789  | 0.1632 |
| 41 | History of Pericarditis: Chronic-Stage 2 or 3 *                         | -0.1570 | 0.3956 |
| 42 | History of Pericarditis: Viral or Traumatic-Stage 2 or 3 *              | 0.2146  | 0.2431 |
| 43 | History of Thrombophlebitis-Stage 2 or 3 *                              | -0.1115 | 0.1430 |
| 44 | History of Tibial/Iliac/Femoral/Popliteal Artery Disease-Stage 2 or 3 * | 0.0900  | 0.3217 |
| 45 | hx_Drug-Drug interactions                                               | 0.0611  | 0.0593 |
| 46 |                                                                         |         |        |
| 47 |                                                                         |         |        |
| 48 |                                                                         |         |        |
| 49 |                                                                         |         |        |
| 50 |                                                                         |         |        |
| 51 |                                                                         |         |        |
| 52 |                                                                         |         |        |
| 53 |                                                                         |         |        |
| 54 |                                                                         |         |        |
| 55 |                                                                         |         |        |
| 56 |                                                                         |         |        |
| 57 |                                                                         |         |        |
| 58 |                                                                         |         |        |
| 59 |                                                                         |         |        |
| 60 |                                                                         |         |        |

|    |                                                                                    |         |        |
|----|------------------------------------------------------------------------------------|---------|--------|
| 1  |                                                                                    |         |        |
| 2  |                                                                                    |         |        |
| 3  |                                                                                    |         |        |
| 4  | History of Diabetes Mellitus Type 1 or Type 2-Stage 1 *                            | 0.0914  | 0.0047 |
| 5  | History of Diabetes Mellitus Type 1 or Type 2-Stage 2 *                            | 0.3099  | <.0001 |
| 6  | History of Diabetes Mellitus Type 1 or Type 2-Stage 3 *                            | 0.1290  | 0.0545 |
| 7  | History of Hypothyroidism-Stage 2 or 3 *                                           | 0.2294  | 0.1961 |
| 8  | History of Crohns Disease-Stage 2 or 3 *                                           | 0.8327  | 0.0190 |
| 9  | History of Diverticular Disease-Stage 1 *                                          | 0.1541  | 0.0060 |
| 10 | History of Diverticular Disease-Stage 2 or 3 *                                     | 0.1222  | 0.1954 |
| 11 | History of Neoplasm, Malignant: Colon and Rectum-Stage 3 *                         | 0.4265  | <.0001 |
| 12 | History of Neoplasm, Malignant: Stomach-Stage 3 *                                  | 0.6959  | 0.0011 |
| 13 | History of Neoplasm, Malignant: Bladder, Urinary-Stage 1*                          | -0.0471 | 0.3540 |
| 14 | History of Neoplasm, Malignant: Bladder, Urinary-Stage 3 *                         | 0.3138  | 0.3404 |
| 15 | History of Neoplasm, Malignant: Kidneys-Stage 3 *                                  | 0.3046  | 0.3079 |
| 16 | History of Renal Failure-Stage 2 or 3 *                                            | 0.1469  | <.0001 |
| 17 | History of Anemia: Aplastic, Acquired-Stage 2 or 3 *                               | 0.2973  | 0.0315 |
| 18 | History of Neoplasm, Malignant Hematologic-Stage 1 *                               | 0.2804  | 0.0030 |
| 19 | History of Neoplasm, Malignant Hematologic-Stage 2 *                               | -0.1374 | 0.3846 |
| 20 | History of Cholecystitis and Cholelithiasis-Stage 1 *                              | 0.1693  | 0.0044 |
| 21 | History of Cholecystitis and Cholelithiasis-Stage 2 *                              | 0.1182  | 0.0785 |
| 22 | History of Cholecystitis and Cholelithiasis-Stage 3 *                              | 0.1319  | 0.2852 |
| 23 | History of Cirrhosis of the Liver-Stage 2 or 3 *                                   | 0.2384  | 0.0009 |
| 24 | History of Neoplasm, Malignant: Pancreas-Stage 1 *                                 | -0.5740 | 0.0601 |
| 25 | History of Neoplasm, Malignant: Pancreas-Stage 2 or 3 *                            | 0.5440  | 0.3348 |
| 26 | History of Rheumatic Fever-Stage 2 *                                               | 0.0840  | 0.3429 |
| 27 | History of Neoplasm, Malignant: Prostate-Stage 3 *                                 | 0.1568  | 0.3460 |
| 28 | History of Progressive Systemic Sclerosis-Stage 1 *                                | 0.4957  | 0.3135 |
| 29 | History of Cerebrovascular Disease-Stage 1 *                                       | 0.1907  | <.0001 |
| 30 | History of Cerebrovascular Disease-Stage 2 *                                       | 0.1589  | <.0001 |
| 31 | History of Cerebrovascular Disease-Stage 3 *                                       | 0.1081  | 0.0017 |
| 32 | History of Dementia: Primary Degenerative (Alzheimer or Pick)-<br>Stage 1 *        | 0.3414  | <.0001 |
| 33 | History of Dementia: Primary Degenerative (Alzheimer or Pick)-<br>Stage 2 or 3 *   | 0.6441  | <.0001 |
| 34 | History of Potentially inappropriate prescribing - always to be<br>avoided drugs * | -0.0564 | 0.0053 |
| 35 | History of polypharmacy *                                                          | 0.1075  | <.0001 |
| 36 | History of Depression-Stage 1 or 2 *                                               | 0.0912  | 0.1498 |
| 37 | History of Drug Abuse, Dependence, Intoxication: Alcohol-Stage 2<br>or 3 *         | 0.4811  | <.0001 |
| 38 | History of Chronic Obstructive Pulmonary Disease-Stage 1 or 2 *                    | 0.2667  | <.0001 |
| 39 | History of Chronic Obstructive Pulmonary Disease-Stage 3 *                         | 0.5780  | <.0001 |
| 40 | History of Neoplasm, Malignant: Lungs, Bronchi, or Mediastinum-<br>Stage 1 *       | 0.3130  | 0.0002 |
| 41 | History of Neoplasm, Malignant: Lungs, Bronchi, or Mediastinum-<br>Stage 3 *       | 0.3404  | 0.1018 |
| 42 |                                                                                    |         |        |
| 43 |                                                                                    |         |        |
| 44 |                                                                                    |         |        |
| 45 |                                                                                    |         |        |
| 46 |                                                                                    |         |        |
| 47 |                                                                                    |         |        |
| 48 |                                                                                    |         |        |
| 49 |                                                                                    |         |        |
| 50 |                                                                                    |         |        |
| 51 |                                                                                    |         |        |
| 52 |                                                                                    |         |        |
| 53 |                                                                                    |         |        |
| 54 |                                                                                    |         |        |
| 55 |                                                                                    |         |        |
| 56 |                                                                                    |         |        |
| 57 |                                                                                    |         |        |
| 58 |                                                                                    |         |        |
| 59 |                                                                                    |         |        |
| 60 |                                                                                    |         |        |

|    |                                                    |         |        |
|----|----------------------------------------------------|---------|--------|
| 1  |                                                    |         |        |
| 2  |                                                    |         |        |
| 3  |                                                    |         |        |
| 4  | History of Pneumonia: Bacterial-Stage 2 *          | 0.2648  | 0.1229 |
| 5  | History of Pneumonia: Bacterial-Stage 3 *          | 0.2801  | 0.0001 |
| 6  | History of Pulmonary Embolism-Stage 3 *            | -0.1687 | 0.1666 |
| 7  | History of Neoplasm, Malignant: Melanoma-Stage 3 * | -0.6881 | 0.1493 |
| 8  | History of Oral Anti-coagulants *                  | 0.0418  | 0.2647 |
| 9  | History of Other Cardiovascular drugs *            | 0.1298  | <.0001 |
| 10 | Male Genital System (from any data source)         | -0.2023 | <.0001 |
| 11 | Musculoskeletal Disease (from any data source)     | -0.1057 | 0.1679 |
| 12 | Hospitalization                                    | 0.2060  | <.0001 |
| 13 | Number of hospitalizations                         | -0.0217 | 0.2903 |
| 14 | Polypharmacy                                       | 0.0913  | 0.0005 |
| 15 | Psychological Disease (from any data source)       | 0.2569  | 0.0032 |
| 16 | Cardiovascular Disease (from hospital data)        | 0.0736  | 0.2121 |
| 17 | Endocrine Disease (from hospital data)             | 0.1978  | 0.0758 |
| 18 | Gastrointestinal Disease (from hospital data)      | -0.0878 | 0.2559 |
| 19 | Genitourinary Disease (from hospital data)         | -0.4235 | 0.0770 |
| 20 | Hepatobiliary (from hospital data)                 | -0.1192 | 0.0959 |
| 21 | Neurologic Disease (from hospital data)            | 0.0927  | 0.3439 |
| 22 | Skin Disease (from any data source)                | 0.2454  | 0.0506 |
| 23 | Any of the other 9 Cardiovascular drugs            | 0.0558  | 0.2144 |
| 24 | Number of the other 9 Cardiovascular drugs         | 0.0680  | <.0001 |
| 25 |                                                    |         |        |
| 26 |                                                    |         |        |
| 27 |                                                    |         |        |
| 28 |                                                    |         |        |
| 29 |                                                    |         |        |
| 30 |                                                    |         |        |
| 31 |                                                    |         |        |
| 32 |                                                    |         |        |
| 33 |                                                    |         |        |
| 34 |                                                    |         |        |

### Females 85 and over

| Variable | Coefficient                                                    | p-value |        |
|----------|----------------------------------------------------------------|---------|--------|
| 35       |                                                                |         |        |
| 36       | Intercept                                                      | -4.4541 | <.0001 |
| 37       | Number of Chronic Conditions (from any data source)=1          | 0.1340  | 0.0095 |
| 38       | Number of Chronic Conditions (from any data source)=2          | 0.2527  | <.0001 |
| 39       | Number of Chronic Conditions (from any data source)=3          | 0.3482  | <.0001 |
| 40       | Number of Chronic Conditions (from any data source)=4          | 0.3660  | <.0001 |
| 41       | Number of Chronic Conditions (from any data source)=5          | 0.3330  | 0.0004 |
| 42       | Number of Chronic Conditions (from any data source)=6 or more  | 0.3306  | 0.0032 |
| 43       | Number of Chronic Conditions (from hospital data)=1            | -0.0564 | 0.3573 |
| 44       | Number of Chronic Conditions (from hospital data)=2            | -0.0127 | 0.8565 |
| 45       | Number of Chronic Conditions (from hospital data)=3            | 0.1268  | 0.0996 |
| 46       | Number of Chronic Conditions (from hospital data)=4 or more    | 0.1910  | 0.0340 |
| 47       | Number of Chronic Conditions (from home health prescription)=1 | 0.3946  | <.0001 |
| 48       |                                                                |         |        |
| 49       | Number of Chronic Conditions (from home health prescription)=2 | 0.6315  | <.0001 |
| 50       | or more                                                        |         |        |
| 51       | Number of Chronic Conditions (from drug prescriptions)=1       | -0.0973 | 0.0439 |
| 52       | Number of Chronic Conditions (from drug prescriptions)=2       | -0.1674 | 0.0036 |
| 53       | Number of Chronic Conditions (from drug prescriptions)=3       | -0.1843 | 0.0057 |
| 54       |                                                                |         |        |
| 55       |                                                                |         |        |
| 56       |                                                                |         |        |
| 57       |                                                                |         |        |
| 58       |                                                                |         |        |
| 59       |                                                                |         |        |
| 60       |                                                                |         |        |

|    |                                                                  |         |        |
|----|------------------------------------------------------------------|---------|--------|
| 1  |                                                                  |         |        |
| 2  |                                                                  |         |        |
| 3  | Number of Chronic Conditions (from drug prescriptions)=4         | -0.0790 | 0.3133 |
| 4  | Number of Chronic Conditions (from drug prescriptions)=5 or more | -0.0275 | 0.7718 |
| 5  | Age on 12 /31/ 2012                                              | -0.0002 | <.0001 |
| 6  | Cardiovascular Disease (from home health prescription)           | -0.0967 | 0.0033 |
| 7  | Blood Diseases (from home health prescription)                   | -0.3867 | 0.0183 |
| 8  | Respiratory Diseases (from home health prescription)             | -0.3093 | 0.0020 |
| 9  | Skin Disease (from home health prescription)                     | 0.2047  | 0.0023 |
| 10 | Genitourinary (dialysis)                                         | 0.8709  | 0.0002 |
| 11 | Aortic Stenosis-Stage 3                                          | 0.2778  | 0.0107 |
| 12 | Conduction Disorders-all stages                                  | -0.2408 | 0.0266 |
| 13 | Congestive Heart Failure-Stage3                                  | 0.1248  | 0.0454 |
| 14 | Coronary Artery Disease-Stage 1                                  | -0.1922 | 0.0014 |
| 15 | Coronary Artery Disease-Stage 2                                  | 0.2265  | 0.0047 |
| 16 | Essential Hypertension-Stage 1                                   | -0.3230 | <.0001 |
| 17 | Essential Hypertension-Stage 2                                   | -0.1393 | 0.0052 |
| 18 | Mitral Stenosis-Stage 2                                          | -0.4336 | 0.0440 |
| 19 | Diabetes Mellitus Type 1 or Type 2-Stage 2                       | -0.3893 | 0.0295 |
| 20 | Functional Digestive Disorders-Stage 1                           | 0.2998  | 0.0008 |
| 21 | Hernia, Hiatal or Reflux Esophagitis-Stage 1                     | -0.2273 | 0.0578 |
| 22 | Neoplasm, Malignant: Colon and Rectum-Stage 2                    | -0.9583 | 0.0003 |
| 23 | Renal Failure-Stage 2 or 3                                       | 0.1598  | 0.0010 |
| 24 | Neoplasm, Malignant: Breast, Female-Stage 1                      | -0.4438 | 0.0011 |
| 25 | Anemia: Aplastic, Acquired-Stage 2 or 3                          | 0.9430  | <.0001 |
| 26 | Rheumatic Fever- Stage 2                                         | 0.2483  | 0.0251 |
| 27 | Rheumatic Fever- Stage 3                                         | 0.7922  | <.0001 |
| 28 | Cerebrovascular Disease-Stage 3                                  | 0.7130  | 0.0005 |
| 29 | Dementia: Primary Degenerative (Alzheimer or Pick)-Stage 2 or 3  | 0.2095  | 0.0381 |
| 30 | Bipolar Disorder - Manic Episode-Stage 2                         | 1.3679  | 0.0661 |
| 31 | Any Cancer - Stage 2 (from hospital data)                        | 1.1401  | <.0001 |
| 32 | Any Cancer - Stage 3 (from hospital data)                        | 0.9674  | <.0001 |
| 33 | Any Cardiovascular Disease - Stage 1 (from hospital data)        | 0.2126  | 0.0002 |
| 34 | Any Cardiovascular - Stage 3 (from hospital data)                | 0.1855  | <.0001 |
| 35 | Any Endocrine - Stage 2 (from hospital data)                     | 0.4821  | 0.0015 |
| 36 | Any Gastrointestinal Disease - Stage 1 (from hospital data)      | -0.2081 | 0.0003 |
| 37 | Any Hemotologic Disease - Stage 3 (from hospital data)           | 0.3382  | 0.0529 |
| 38 | Any Musculoskeletal Disease - Stage 1 (from hospital data)       | -0.0783 | 0.0438 |
| 39 | Any Neurologic Disease - Stage 3 (from hospital data)            | -0.4771 | 0.0171 |
| 40 | Any Respiratory Disease - Stage 3 (from hospital data)           | 0.2027  | 0.0040 |
| 41 | Neoplasm, Malignant: Melanoma-Stage 2                            | -1.4509 | 0.0019 |
| 42 | Cardiovascular Disease (from drug prescriptions)                 | -0.2006 | <.0001 |
| 43 | Endocrine Disease (from drug prescriptions)                      | -0.1009 | 0.0041 |
| 44 | Genitourinary Disease (from drug prescriptions)                  | 0.2622  | 0.0004 |
| 45 | Hematologic Disease (from drug prescriptions)                    | 0.1242  | 0.0087 |
| 46 | Hepatobiliary Disease (from drug prescriptions)                  | 0.8195  | 0.0083 |
| 47 |                                                                  |         |        |
| 48 |                                                                  |         |        |
| 49 |                                                                  |         |        |
| 50 |                                                                  |         |        |
| 51 |                                                                  |         |        |
| 52 |                                                                  |         |        |
| 53 |                                                                  |         |        |
| 54 |                                                                  |         |        |
| 55 |                                                                  |         |        |
| 56 |                                                                  |         |        |
| 57 |                                                                  |         |        |
| 58 |                                                                  |         |        |
| 59 |                                                                  |         |        |
| 60 |                                                                  |         |        |

|    |                                                                              |         |        |
|----|------------------------------------------------------------------------------|---------|--------|
| 1  |                                                                              |         |        |
| 2  |                                                                              |         |        |
| 3  | Oral anti-coagulants                                                         | -0.0905 | 0.0222 |
| 4  | Statins                                                                      | -0.2123 | <.0001 |
| 5  | ACE/ARB                                                                      | -0.1098 | <.0001 |
| 6  | Calcium channel blockers                                                     | -0.0802 | 0.0002 |
| 7  | Anti-arrhythmics                                                             | 0.0988  | 0.0106 |
| 8  | Digitalis glycosides                                                         | 0.1114  | 0.0002 |
| 9  | Nitrates                                                                     | 0.1279  | <.0001 |
| 10 | Diuretics                                                                    | 0.0611  | 0.0088 |
| 11 | Number of ER visits labeled 'Yellow'                                         | -0.2129 | 0.0004 |
| 12 | Total number of ER visits                                                    | 0.4649  | <.0001 |
| 13 | Eye Disease (from any data source)                                           | -0.1404 | <.0001 |
| 14 | History of Cancer (from drug prescriptions) *                                | 0.1381  | 0.0002 |
| 15 | History of Endocrine Disease (from drug prescriptions) *                     | 0.1108  | 0.0005 |
| 16 | History of Psychological Disease (from drug prescriptions) *                 | 0.0824  | <.0001 |
| 17 | History of Respiratory Disease (from drug prescriptions) *                   | 0.0686  | 0.0043 |
| 18 | History of Aortic Stenosis-Stage 1 *                                         | 0.1279  | 0.0492 |
| 19 | History of Aortic Stenosis-Stage 3 *                                         | 0.3272  | <.0001 |
| 20 | History of Arrhythmias-Stage 2 *                                             | 0.1359  | <.0001 |
| 21 | History of Cardiomyopathies-Stage 3 *                                        | 0.4752  | 0.0004 |
| 22 | History of Congestive Heart Failure-Stage 3 *                                | 0.1905  | <.0001 |
| 23 | History of Coronary Artery Disease-Stage 1 *                                 | 0.0616  | 0.0342 |
| 24 | History of Coronary Artery Disease-Stage 2 *                                 | 0.1270  | 0.0059 |
| 25 | History of Essential Hypertension-Stage 3 *                                  | 0.1426  | <.0001 |
| 26 | History of Mitral Stenosis-Stage 2 *                                         | 0.2121  | 0.0393 |
| 27 | History of Mitral Stenosis-Stage 3 *                                         | 0.2109  | 0.0254 |
| 28 | History of Tibial/Iliac/Femoral/Popliteal Artery Disease-Stage 2 or 3 *      | 0.1684  | 0.0609 |
| 29 | History of Diabetes Mellitus Type 1 or Type 2-Stage 1 *                      | 0.0983  | 0.0030 |
| 30 | History of Neoplasm, Malignant: Kidneys-Stage 1 *                            | 0.3075  | 0.0501 |
| 31 | History of Renal Failure-Stage 2 or 3 *                                      | 0.1614  | <.0001 |
| 32 | History of Neoplasm, Malignant: Breast, Female-Stage 3 *                     | 0.5190  | 0.0032 |
| 33 | History of Anemia: Aplastic, Acquired-Stage 2 or 3 *                         | 0.3169  | 0.0038 |
| 34 | History of Neoplasm, Malignant Hematologic-Stage 1 *                         | 0.2489  | 0.0263 |
| 35 | History of Cholecystitis and Cholelithiasis-Stage 1 *                        | 0.1278  | 0.0084 |
| 36 | History of Cirrhosis of the Liver-Stage 2 or 3 *                             | 0.1977  | 0.0150 |
| 37 | History of Rheumatic Fever-Stage 2 *                                         | 0.1641  | 0.0171 |
| 38 | History of Rheumatic Fever-Stage 3 *                                         | 0.4295  | <.0001 |
| 39 | History of Cerebrovascular Disease-Stage 1 *                                 | 0.1780  | <.0001 |
| 40 | History of Cerebrovascular Disease-Stage 2 *                                 | 0.1248  | 0.0001 |
| 41 | History of Cerebrovascular Disease-Stage 3 *                                 | 0.2010  | <.0001 |
| 42 | History of Dementia: Primary Degenerative (Alzheimer or Pick)-Stage 1 *      | 0.2327  | <.0001 |
| 43 | History of Dementia: Primary Degenerative (Alzheimer or Pick)-Stage 2 or 3 * | 0.3112  | <.0001 |
| 44 | History of polypharmacy *                                                    | 0.0412  | 0.0637 |
| 45 |                                                                              |         |        |
| 46 |                                                                              |         |        |
| 47 |                                                                              |         |        |
| 48 |                                                                              |         |        |
| 49 |                                                                              |         |        |
| 50 |                                                                              |         |        |
| 51 |                                                                              |         |        |
| 52 |                                                                              |         |        |
| 53 |                                                                              |         |        |
| 54 |                                                                              |         |        |
| 55 |                                                                              |         |        |
| 56 |                                                                              |         |        |
| 57 |                                                                              |         |        |
| 58 |                                                                              |         |        |
| 59 |                                                                              |         |        |
| 60 |                                                                              |         |        |

|                                                                 |         |        |
|-----------------------------------------------------------------|---------|--------|
| History of Chronic Obstructive Pulmonary Disease-Stage 1 or 2 * | 0.1641  | <.0001 |
| History of Chronic Obstructive Pulmonary Disease-Stage 3 *      | 0.2718  | 0.0010 |
| History of Pneumonia: Bacterial-Stage 3 *                       | 0.2305  | 0.0024 |
| History of Oral Anti-coagulants *                               | 0.1412  | 0.0001 |
| History of Other Cardiovascular drugs *                         | 0.0945  | 0.0002 |
| Musculoskeletal Disease (from any data source)                  | -0.1212 | <.0001 |
| Hospitalization                                                 | 0.4053  | <.0001 |
| Number of hospitalizations                                      | -0.0572 | 0.0152 |
| Polypharmacy                                                    | 0.0686  | 0.0047 |
| Psychological Disease (from any data source)                    | 0.0241  | 0.3329 |
| Respiratory Disease (from any data source)                      | 0.1452  | <.0001 |
| Cancer (from hospital data)                                     | 0.1946  | 0.0015 |
| Number of the other 9 Cardiovascular drugs                      | 0.0343  | 0.0067 |

### Males 85 and over

| Variable                                                               | Coefficient | p-value |
|------------------------------------------------------------------------|-------------|---------|
| Intercept                                                              | -6.5943     | <.0001  |
| Number of Chronic Conditions (from any data source)=1                  | 0.0148      | 0.7836  |
| Number of Chronic Conditions (from any data source)=2                  | 0.0567      | 0.3273  |
| Number of Chronic Conditions (from any data source)=3                  | 0.1133      | 0.0832  |
| Number of Chronic Conditions (from any data source)=4                  | 0.1108      | 0.1382  |
| Number of Chronic Conditions (from any data source)=5                  | 0.1027      | 0.2348  |
| Number of Chronic Conditions (from any data source)=6 or more          | -0.00058    | 0.9956  |
| Number of Chronic Conditions (from hospital data)=1                    | 0.2260      | <.0001  |
| Number of Chronic Conditions (from hospital data)=2                    | 0.3490      | <.0001  |
| Number of Chronic Conditions (from hospital data)=3                    | 0.3454      | <.0001  |
| Number of Chronic Conditions (from hospital data)=4 or more            | 0.2443      | 0.0024  |
| Number of Chronic Conditions (from home health prescription)=1         | 0.5620      | <.0001  |
| Number of Chronic Conditions (from home health prescription)=2 or more | 0.9112      | <.0001  |
| Age on 12/ 31/ 2012                                                    | 0.0552      | <.0001  |
| Cardiovascular Disease (from home health prescription)                 | -0.1808     | 0.0009  |
| Neurologic Diseases (from home health prescription)                    | -0.2313     | 0.0125  |
| Cancer (chemo or radiation )                                           | 0.4807      | 0.0028  |
| Aortic Stenosis-Stage 3                                                | 0.3770      | 0.0178  |
| Coronary Artery Disease-Stage 2                                        | 0.1810      | 0.0345  |
| Essential Hypertension-Stage 1                                         | -0.1334     | 0.0049  |
| Mitral Stenosis-Stage 3                                                | 0.7232      | 0.0092  |
| Crohns Disease-Stage 2 or 3                                            | 2.0123      | 0.0823  |
| Renal Failure-Stage 2 or 3                                             | 0.2166      | <.0001  |
| Neoplasm, Malignant Hematologic-Stage 2                                | 0.9737      | 0.0279  |
| Cerebrovascular Disease-Stage 2                                        | -0.3039     | 0.0005  |



|    |                                                                             |         |        |
|----|-----------------------------------------------------------------------------|---------|--------|
| 1  |                                                                             |         |        |
| 2  |                                                                             |         |        |
| 3  | Dementia: Primary Degenerative (Alzheimer or Pick)-Stage 1                  | 0.4636  | 0.0033 |
| 4  | Neoplasm, Malignant: Lungs, Bronchi, or Mediastinum-Stage 1                 | 1.0085  | <.0001 |
| 5  | Any Cancer - Stage 3 (from hospital data)                                   | 1.2151  | <.0001 |
| 6  | Any Cardiovascular - Stage 3 (from hospital data)                           | 0.1683  | 0.0006 |
| 7  | Any Eye Disease – All stages (from hospital data)                           | -0.3186 | 0.0024 |
| 8  | Any Psychologic Disease - Stage 1 (from hospital data)                      | -0.3000 | 0.0483 |
| 9  | Any Psychologic Disease - Stage 2 (from hospital data)                      | 0.3406  | 0.0468 |
| 10 | Cancer (from any data source)                                               | 0.0881  | 0.0255 |
| 11 | Cardiovascular Disease (from drug prescriptions)                            | -0.0958 | 0.0203 |
| 12 | Eye Disease (from drug prescriptions)                                       | -0.1138 | 0.0019 |
| 13 | Genitourinary Disease (from drug prescriptions)                             | 0.3297  | 0.0004 |
| 14 | Hepatobiliary Disease (from drug prescriptions)                             | 1.1786  | 0.0031 |
| 15 | Respiratory Disease (from drug prescriptions)                               | 0.2047  | <.0001 |
| 16 | Day hospitalization                                                         | -0.2140 | 0.0003 |
| 17 | Statins                                                                     | -0.1823 | <.0001 |
| 18 | ACE/ARB                                                                     | -0.1220 | <.0001 |
| 19 | Digitalis glycosides                                                        | 0.1380  | 0.0011 |
| 20 | Nitrates                                                                    | 0.1895  | <.0001 |
| 21 | Diuretics                                                                   | 0.1133  | <.0001 |
| 22 | Number of ER visits labeled 'Yellow'                                        | -0.3232 | <.0001 |
| 23 | Total number of ER visits                                                   | 0.5087  | <.0001 |
| 24 | Genitourinary Disease (from any data source)                                | 0.1686  | 0.0037 |
| 25 | Hematologic Disease (from any data source)                                  | 0.1699  | 0.0006 |
| 26 | History of Endocrine Disease (from drug prescriptions) *                    | 0.0877  | 0.0078 |
| 27 | History of Psychological Disease (from drug prescriptions) *                | 0.1168  | 0.0009 |
| 28 | History of Aortic Stenosis-Stage 3 *                                        | 0.3893  | 0.0002 |
| 29 | History of Arrhythmias-Stage 2 *                                            | 0.1078  | 0.0013 |
| 30 | History of Congestive Heart Failure-Stage 3 *                               | 0.2010  | 0.0002 |
| 31 | History of Coronary Artery Disease-Stage 1 *                                | 0.1312  | 0.0002 |
| 32 | History of Coronary Artery Disease-Stage 2 *                                | 0.1103  | 0.0392 |
| 33 | History of Coronary Artery Disease-Stage 3 *                                | 0.1075  | 0.0476 |
| 34 | History of Essential Hypertension-Stage 3 *                                 | 0.1204  | 0.0079 |
| 35 | History of Pericarditis: Viral or Traumatic-Stage 2 or 3 *                  | -0.7456 | 0.0101 |
| 36 | History of Diabetes Mellitus Type 1 or Type 2-Stage 1 *                     | 0.1159  | 0.0141 |
| 37 | History of Neoplasm, Malignant: Bladder, Urinary-Stage 1 *                  | 0.1311  | 0.0546 |
| 38 | History of Renal Failure-Stage 2 or 3 *                                     | 0.1660  | <.0001 |
| 39 | History of Neoplasm, Malignant Hematologic-Stage 1 *                        | 0.3476  | 0.0069 |
| 40 | History of Neoplasm, Malignant Hematologic-Stage 2 *                        | -1.1984 | 0.0057 |
| 41 | History of Cirrhosis of the Liver-Stage 2 or 3 *                            | 0.2949  | 0.0083 |
| 42 | History of Progressive Systemic Sclerosis-Stage 1 *                         | 2.4748  | 0.0284 |
| 43 | History of Cerebrovascular Disease-Stage 1 *                                | 0.2552  | <.0001 |
| 44 | History of Cerebrovascular Disease-Stage 3 *                                | 0.1474  | 0.0006 |
| 45 | History of Dementia: Primary Degenerative (Alzheimer or Pick)-<br>Stage 1 * | 0.2598  | <.0001 |
| 46 |                                                                             |         |        |
| 47 |                                                                             |         |        |
| 48 |                                                                             |         |        |
| 49 |                                                                             |         |        |
| 50 |                                                                             |         |        |
| 51 |                                                                             |         |        |
| 52 |                                                                             |         |        |
| 53 |                                                                             |         |        |
| 54 |                                                                             |         |        |
| 55 |                                                                             |         |        |
| 56 |                                                                             |         |        |
| 57 |                                                                             |         |        |
| 58 |                                                                             |         |        |
| 59 |                                                                             |         |        |
| 60 |                                                                             |         |        |

|    |                                                                 |         |        |
|----|-----------------------------------------------------------------|---------|--------|
| 1  |                                                                 |         |        |
| 2  |                                                                 |         |        |
| 3  | History of Dementia: Primary Degenerative (Alzheimer or Pick)-  | 0.2971  | 0.0457 |
| 4  | Stage 2 or 3 *                                                  |         |        |
| 5  | History of Potentially inappropriate prescribing - always to be | -0.0705 | 0.0104 |
| 6  | avoided drugs *                                                 |         |        |
| 7  | History of polypharmacy *                                       | 0.1276  | 0.0001 |
| 8  | History of Chronic Obstructive Pulmonary Disease-Stage 1 or 2 * | 0.2083  | <.0001 |
| 9  | History of Chronic Obstructive Pulmonary Disease-Stage 3 *      | 0.2686  | 0.0030 |
| 10 | History of Neoplasm, Malignant: Lungs, Bronchi, or Mediastinum- | 0.4042  | 0.0142 |
| 11 | Stage 1 *                                                       |         |        |
| 12 | History of Pneumonia: Bacterial-Stage 2 *                       | 0.4137  | 0.0392 |
| 13 | History of Other Cardiovascular drugs *                         | 0.1277  | 0.0005 |
| 14 | Immunologic Disease (from any data source)                      | 0.9577  | 0.0461 |
| 15 | Male Genital System (from any data source)                      | -0.1301 | <.0001 |
| 16 | Neurologic Disease (from any data source)                       | 0.1639  | <.0001 |
| 17 | Polypharmacy                                                    | 0.0778  | 0.0206 |
| 18 | Psychological Disease (from any data source)                    | 0.1247  | 0.0017 |
| 19 | Endocrine Disease (from hospital data)                          | 0.1413  | 0.0154 |
| 20 | Respiratory Disease (from hospital data)                        | 0.3324  | <.0001 |
| 21 |                                                                 |         |        |
| 22 |                                                                 |         |        |
| 23 |                                                                 |         |        |
| 24 |                                                                 |         |        |
| 25 |                                                                 |         |        |
| 26 |                                                                 |         |        |
| 27 |                                                                 |         |        |
| 28 |                                                                 |         |        |
| 29 |                                                                 |         |        |
| 30 |                                                                 |         |        |
| 31 |                                                                 |         |        |
| 32 |                                                                 |         |        |
| 33 |                                                                 |         |        |
| 34 |                                                                 |         |        |
| 35 |                                                                 |         |        |
| 36 |                                                                 |         |        |
| 37 |                                                                 |         |        |
| 38 |                                                                 |         |        |
| 39 |                                                                 |         |        |
| 40 |                                                                 |         |        |
| 41 |                                                                 |         |        |
| 42 |                                                                 |         |        |
| 43 |                                                                 |         |        |
| 44 |                                                                 |         |        |
| 45 |                                                                 |         |        |
| 46 |                                                                 |         |        |
| 47 |                                                                 |         |        |
| 48 |                                                                 |         |        |
| 49 |                                                                 |         |        |
| 50 |                                                                 |         |        |
| 51 |                                                                 |         |        |
| 52 |                                                                 |         |        |
| 53 |                                                                 |         |        |
| 54 |                                                                 |         |        |
| 55 |                                                                 |         |        |
| 56 |                                                                 |         |        |
| 57 |                                                                 |         |        |
| 58 |                                                                 |         |        |
| 59 |                                                                 |         |        |
| 60 |                                                                 |         |        |

## Predicting Risk Using a Population Based Longitudinal Database

Louis et al

## STROBE Statement—checklist of items that should be included in reports of observational studies

|                           | Item No | Recommendation                                                                                                                                                                                                                                                                                                    |                                                                                                                                |
|---------------------------|---------|-------------------------------------------------------------------------------------------------------------------------------------------------------------------------------------------------------------------------------------------------------------------------------------------------------------------|--------------------------------------------------------------------------------------------------------------------------------|
| <b>Title and abstract</b> | 1       | (a) Indicate the study's design with a commonly used term in the title or the abstract                                                                                                                                                                                                                            | See abstract section: Design.                                                                                                  |
|                           |         | (b) Provide in the abstract an informative and balanced summary of what was done and what was found                                                                                                                                                                                                               | The outcome measures used and what was found are summarized in the sections of the abstract: Main outcome measures and Results |
| <b>Introduction</b>       |         |                                                                                                                                                                                                                                                                                                                   |                                                                                                                                |
| Background/rationale      | 2       | Explain the scientific background and rationale for the investigation being reported                                                                                                                                                                                                                              | See the Introduction section pages 4 and 5                                                                                     |
| Objectives                | 3       | State specific objectives, including any prespecified hypotheses                                                                                                                                                                                                                                                  | Our objectives are described in the last two paragraphs of the Introduction                                                    |
| <b>Methods</b>            |         |                                                                                                                                                                                                                                                                                                                   |                                                                                                                                |
| Study design              | 4       | Present key elements of study design early in the paper                                                                                                                                                                                                                                                           | See last paragraph of the Introduction and the Methods section                                                                 |
| Setting                   | 5       | Describe the setting, locations, and relevant dates, including periods of recruitment, exposure, follow-up, and data collection                                                                                                                                                                                   | See <u>Study Data and Study Population</u> at beginning of Methods section                                                     |
| Participants              | 6       | (a) <i>Cohort study</i> —Give the eligibility criteria, and the sources and methods of selection of participants. Describe methods of follow-up                                                                                                                                                                   | Our study includes 100% of the adult population<br>See <u>Study Data and Study Population</u> at beginning of Methods section  |
|                           |         | (b) <i>Cohort study</i> —Give the eligibility criteria, and the sources and methods of case ascertainment and control selection. Give the rationale for the choice of cases and controls<br><i>Cross-sectional study</i> —Give the eligibility criteria, and the sources and methods of selection of participants |                                                                                                                                |
|                           |         | (b) <i>Cohort study</i> —For matched studies, give matching criteria and number of exposed and unexposed                                                                                                                                                                                                          |                                                                                                                                |
|                           |         | <i>Case-control study</i> —For matched studies, give matching criteria and the number of controls per case                                                                                                                                                                                                        |                                                                                                                                |
| Variables                 | 7       | Clearly define all outcomes, exposures, predictors, potential confounders, and effect modifiers. Give diagnostic criteria, if applicable                                                                                                                                                                          | See the Dependent variable and Independent variable sections in the Methods section                                            |
| Data sources/ measurement | 8*      | For each variable of interest, give sources of data                                                                                                                                                                                                                                                               | See the Dependent variable                                                                                                     |

|                        |     |                                                                                                                                                                                                                                                                                                           |                                                                                                                                                                              |
|------------------------|-----|-----------------------------------------------------------------------------------------------------------------------------------------------------------------------------------------------------------------------------------------------------------------------------------------------------------|------------------------------------------------------------------------------------------------------------------------------------------------------------------------------|
|                        |     | and details of methods of assessment (measurement). Describe comparability of assessment methods if there is more than one group                                                                                                                                                                          | and Independent variable sections in the Methods section. In addition we have included an Appendix with detailed mapping to independent variable.                            |
| Bias                   | 9   | Describe any efforts to address potential sources of bias                                                                                                                                                                                                                                                 | See Evaluation of the Models (page 10) in the Methods section                                                                                                                |
| Study size             | 10  | Explain how the study size was arrived at                                                                                                                                                                                                                                                                 | Our study includes 100% of the adult population                                                                                                                              |
| Quantitative variables | 11  | Explain how quantitative variables were handled in the analyses. If applicable, describe which groupings were chosen and why                                                                                                                                                                              | See the Dependent variable and Independent variable sections in the Methods section. In addition we have included an Appendix with detailed mapping to independent variable. |
| Statistical methods    | 12  | (a) Describe all statistical methods, including those used to control for confounding                                                                                                                                                                                                                     | See the Modelling section and Evaluation of the Models section (pages 9 and 10) of the Methods                                                                               |
|                        |     | (b) Describe any methods used to examine subgroups and interactions                                                                                                                                                                                                                                       | See the Modelling section (pages 9 and 10) of the Methods                                                                                                                    |
|                        |     | (c) Explain how missing data were addressed                                                                                                                                                                                                                                                               |                                                                                                                                                                              |
|                        |     | (d) <i>Cohort study</i> —If applicable, explain how loss to follow-up was addressed<br><i>Case-control study</i> —If applicable, explain how matching of cases and controls was addressed<br><i>Cross-sectional study</i> —If applicable, describe analytical methods taking account of sampling strategy | Our study includes 100% of the adult population                                                                                                                              |
|                        |     | (e) Describe any sensitivity analyses                                                                                                                                                                                                                                                                     | See Evaluation of the Models last paragraph of Methods.                                                                                                                      |
| <b>Results</b>         |     |                                                                                                                                                                                                                                                                                                           |                                                                                                                                                                              |
| Participants           | 13* | (a) Report numbers of individuals at each stage of study—eg numbers potentially eligible, examined for eligibility, confirmed eligible, included in the study, completing follow-up, and analysed                                                                                                         | See Page 11 Results section                                                                                                                                                  |
|                        |     | (b) Give reasons for non-participation at each stage                                                                                                                                                                                                                                                      | N/A                                                                                                                                                                          |
|                        |     | (c) Consider use of a flow diagram                                                                                                                                                                                                                                                                        |                                                                                                                                                                              |
| Descriptive data       | 14* | (a) Give characteristics of study participants (eg demographic, clinical, social) and information on exposures and potential confounders                                                                                                                                                                  | See Table 1 and Results section (page 11-14)                                                                                                                                 |
|                        |     | (b) Indicate number of participants with missing data for each variable of interest                                                                                                                                                                                                                       |                                                                                                                                                                              |

|                          |     |                                                                                                                                                                                                              |                                                                          |
|--------------------------|-----|--------------------------------------------------------------------------------------------------------------------------------------------------------------------------------------------------------------|--------------------------------------------------------------------------|
|                          |     | (c) <i>Cohort study</i> —Summarise follow-up time (eg, average and total amount)                                                                                                                             | N/A                                                                      |
| Outcome data             | 15* | <i>Cohort study</i> —Report numbers of outcome events or summary measures over time                                                                                                                          |                                                                          |
|                          |     | <i>Case-control study</i> —Report numbers in each exposure category, or summary measures of exposure                                                                                                         |                                                                          |
|                          |     | <i>Cross-sectional study</i> —Report numbers of outcome events or summary measures                                                                                                                           | See Table 2 and figure and pages 14 and 15 of Results section            |
| Main results             | 16  | (a) Give unadjusted estimates and, if applicable, confounder-adjusted estimates and their precision (eg, 95% confidence interval). Make clear which confounders were adjusted for and why they were included | See pages 13                                                             |
|                          |     | (b) Report category boundaries when continuous variables were categorized                                                                                                                                    |                                                                          |
|                          |     | (c) If relevant, consider translating estimates of relative risk into absolute risk for a meaningful time period                                                                                             |                                                                          |
| Other analyses           | 17  | Report other analyses done—eg analyses of subgroups and interactions, and sensitivity analyses                                                                                                               | See Table 2 and page 13 and 14.                                          |
| <b>Discussion</b>        |     |                                                                                                                                                                                                              |                                                                          |
| Key results              | 18  | Summarise key results with reference to study objectives                                                                                                                                                     | See Discussion section page 16                                           |
| Limitations              | 19  | Discuss limitations of the study, taking into account sources of potential bias or imprecision. Discuss both direction and magnitude of any potential bias                                                   | See Discussion section pages 17 and 18                                   |
| Interpretation           | 20  | Give a cautious overall interpretation of results considering objectives, limitations, multiplicity of analyses, results from similar studies, and other relevant evidence                                   | See Discussion section page 18                                           |
| Generalisability         | 21  | Discuss the generalisability (external validity) of the study results                                                                                                                                        | See Discussion section pages 18 and 19                                   |
| <b>Other information</b> |     |                                                                                                                                                                                                              |                                                                          |
| Funding                  | 22  | Give the source of funding and the role of the funders for the present study and, if applicable, for the original study on which the present article is based                                                | The study was funded by the Emilia-Romagna, region of Italy. See page 3. |

\*Give information separately for cases and controls in case-control studies and, if applicable, for exposed and unexposed groups in cohort and cross-sectional studies.

**Note:** An Explanation and Elaboration article discusses each checklist item and gives methodological background and published examples of transparent reporting. The STROBE checklist is best used in conjunction with this article (freely available on the Web sites of PLoS Medicine at <http://www.plosmedicine.org/>, Annals of Internal Medicine at <http://www.annals.org/>, and Epidemiology at <http://www.epidem.com/>). Information on the STROBE Initiative is available at [www.strobe-statement.org](http://www.strobe-statement.org).

# BMJ Open

## Predicting Risk of Hospitalization or Death: A Retrospective Population Based Analysis

|                                 |                                                                                                                                                                                                                                                                                                                                                                                                                                                                                                                                                                                                                                                                                                                                                                                                                                                                                                                                                     |
|---------------------------------|-----------------------------------------------------------------------------------------------------------------------------------------------------------------------------------------------------------------------------------------------------------------------------------------------------------------------------------------------------------------------------------------------------------------------------------------------------------------------------------------------------------------------------------------------------------------------------------------------------------------------------------------------------------------------------------------------------------------------------------------------------------------------------------------------------------------------------------------------------------------------------------------------------------------------------------------------------|
| Journal:                        | <i>BMJ Open</i>                                                                                                                                                                                                                                                                                                                                                                                                                                                                                                                                                                                                                                                                                                                                                                                                                                                                                                                                     |
| Manuscript ID:                  | bmjopen-2014-005223.R2                                                                                                                                                                                                                                                                                                                                                                                                                                                                                                                                                                                                                                                                                                                                                                                                                                                                                                                              |
| Article Type:                   | Research                                                                                                                                                                                                                                                                                                                                                                                                                                                                                                                                                                                                                                                                                                                                                                                                                                                                                                                                            |
| Date Submitted by the Author:   | 30-Aug-2014                                                                                                                                                                                                                                                                                                                                                                                                                                                                                                                                                                                                                                                                                                                                                                                                                                                                                                                                         |
| Complete List of Authors:       | Louis, Daniel; Sidney Kimmel Medical College at Thomas Jefferson University, Center for Research in Medical Education and Health Care<br>Robeson, Mary; Sidney Kimmel Medical College at Thomas Jefferson University, Center for Research in Medical Education and Health Care<br>McAna, John; Thomas Jefferson University, Jefferson School of Population Health<br>Maio, Vittorio; Thomas Jefferson University, Jefferson School of Population Health<br>Keith, Scott; Thomas Jefferson University, Department of Pharmacology & Experimental Therapeutics, Division of Biostatistics<br>Liu, Mengdan; Sidney Kimmel Medical College at Thomas Jefferson University, Center for Research in Medical Education and Health Care<br>Gonnella, Joseph; Sidney Kimmel Medical College at Thomas Jefferson University, Center for Research in Medical Education and Health Care<br>Grilli, Roberto; Agenzia Sanitaria e Sociale Regione Emilia-Romagna, |
| <b>Primary Subject Heading</b>: | Health services research                                                                                                                                                                                                                                                                                                                                                                                                                                                                                                                                                                                                                                                                                                                                                                                                                                                                                                                            |
| Secondary Subject Heading:      | Patient-centred medicine                                                                                                                                                                                                                                                                                                                                                                                                                                                                                                                                                                                                                                                                                                                                                                                                                                                                                                                            |
| Keywords:                       | Quality in health care < HEALTH SERVICES ADMINISTRATION & MANAGEMENT, Organisation of health services < HEALTH SERVICES ADMINISTRATION & MANAGEMENT, Health policy < HEALTH SERVICES ADMINISTRATION & MANAGEMENT                                                                                                                                                                                                                                                                                                                                                                                                                                                                                                                                                                                                                                                                                                                                    |
|                                 |                                                                                                                                                                                                                                                                                                                                                                                                                                                                                                                                                                                                                                                                                                                                                                                                                                                                                                                                                     |

SCHOLARONE™  
Manuscripts

## Predicting Risk of Hospitalization or Death: A Retrospective Population Based Analysis

Daniel Z. Louis<sup>1</sup>, Mary Robeson<sup>1</sup>, John McAna<sup>2</sup>, Vittorio Maio<sup>2</sup>, Scott W. Keith<sup>3</sup>, Mengdan Liu<sup>1</sup>, Joseph S. Gonnella<sup>1</sup>, Roberto Grilli<sup>4</sup>

<sup>1</sup>Center for Research in Medical Education and Health Care, Sidney Kimmel Medical College at Thomas Jefferson University. 1015 Walnut Street, Suite 319. Philadelphia, PA 19107, USA

<sup>2</sup>Jefferson School of Population Health, Thomas Jefferson University. 901 Walnut Street, 10<sup>th</sup> Floor. Philadelphia, PA 19107, USA

<sup>3</sup>Department of Pharmacology & Experimental Therapeutics, Division of Biostatistics, Thomas Jefferson University. 1015 Chestnut Street, Suite M-100. Philadelphia, PA 19107, USA

<sup>4</sup>Agenzia Sanitaria e Sociale Regione Emilia-Romagna, Viale Aldo Moro, 21. Bologna, 40128 Italy.

**Corresponding author:** Daniel Z. Louis, Sidney Kimmel Medical College, 1015 Walnut Street, Suite 319, Philadelphia, PA 19107. USA; Tel: 215-955-6959, [daniel.louis@jefferson.edu](mailto:daniel.louis@jefferson.edu)

**Copyright:** The corresponding author has the right to grant on behalf of all authors and does grant on behalf of all authors, an exclusive license (non-exclusive for Dr. Grilli as a government employee) on a worldwide basis to the BMJ publishing Group Ltd to permit this article (if accepted) to be published in BMJ editions and any other BMJ PGL products and sublicenses such use and exploit all subsidiary rights, as set out in our license.

**Ethical approval:** This study was approved by the Institutional Review Board of Thomas Jefferson University as an expedited retrospective database/record review. The IRB granted a waiver of informed consent.

**Keywords:** hospitalization, risk, medical home, patient-centered care

## Abstract

**Objectives:** Develop predictive models using an administrative health care database that provide information for Patient Centered Medical Homes to proactively identify patients at risk of hospitalization for conditions that may be impacted through improved patient care.

**Design:** Retrospective health care utilization analysis with multivariate logistic regression models.

**Data:** A population-based longitudinal database of residents served by the Emilia-Romagna, Italy health service in the years 2004-2012 including demographic information and utilization of health services by 3,726,380 people age  $\geq 18$  years.

**Outcome measures:** Models designed to predict risk of hospitalization or death in 2012 for problems that are potentially avoidable were developed and evaluated using the area under the receiver operating curve C-statistic, in terms of their sensitivity, specificity, and positive predictive value, and for calibration to assess performance across levels of predicted risk.

**Results:** Among the 3,726,380 adult residents of Emilia-Romagna at the end of 2011, 449,163 (12.1%) were hospitalized in 2012; 4.2% were hospitalized for the selected conditions or died in 2012 (3.6% hospitalized, 1.3% died). The C-statistic for predicting 2012 outcomes was 0.856. The model was well calibrated across categories of predicted risk. For those patients in the highest predicted risk decile group, the average predicted risk was 23.9% and the actual prevalence of hospitalization or death was 24.2%.

**Conclusions:** We have developed a population-based model using a longitudinal administrative database that identifies the risk of hospitalization for residents of the Emilia-Romagna region



1  
2  
3 with a level of performance as high as, or higher than, similar models. The results of this  
4  
5 model, along with profiles of patients identified as high risk are being provided to the physicians  
6  
7 and other health care professionals associated with the Patient Centered Medical Homes to aid in  
8  
9 planning for care management and interventions that may reduce their patients' likelihood of a  
10  
11 preventable, high-cost hospitalization.  
12  
13

#### 14 15 16 17 18 **Strengths and Limitations of this study:** 19

- 20 • This study included the entire adult population of the Emilia-Romagna Region of Italy,  
21 over 3.7 million people.
- 22 • The study used an existing longitudinal administrative health care database with both the  
23 advantage of much lower cost than new data collection and the disadvantage of potential  
24 errors in administrative data.
- 25 • The results of the study are being used to assist in the development of newly formed  
26 Patient Centered Medical Homes.  
27  
28  
29  
30  
31  
32

33 **Word Count:** 3,952 (excluding title page, abstract, references, figure 1, table1 and table 2.)  
34  
35  
36  
37  
38  
39  
40  
41  
42  
43  
44  
45  
46  
47  
48  
49  
50  
51  
52  
53  
54  
55  
56  
57  
58  
59  
60

## Introduction

The predominant healthcare delivery system, which has been a passive model, reacting to patients' problems, is shifting to a more proactive model designed to take the initiative in providing care for an increasingly older population that has a greater prevalence of chronic conditions, often with multiple medical and social needs. These changes are driving the reorganization of the primary care system, emphasizing coordination and cooperation among healthcare professionals.<sup>1,2,3</sup> Among the approaches to addressing this need has been the establishment of Patient Centered Medical Homes, organizations in which teams of healthcare providers are engaged in delivering comprehensive, coordinated, patient-centered care to patient defined populations.

Primary care has a central role in the Italian National Health Service (NHS). Twenty one regional governments are responsible for ensuring the delivery of a health benefits package through a network of geographically defined, population-based Local Health Authorities. Primary care physicians work for these authorities as independent contractors and act as “gatekeepers” for specialty and other referral services for their patients.<sup>4</sup>

With the belief that a strong primary care system is conducive to improving population health, the NHS initiated reforms that encouraged primary care physicians to organize into collaborative arrangements. To this end, the Regione Emilia-Romagna (RER), a large northern region with a population of about 4.5 million, has recently launched a plan in its 11 Local Health Authorities to establish Patient-Centered Medical Homes to better coordinate patient care and help patients avoid unnecessary hospitalizations.

1  
2  
3 The identification of those patients who would benefit most from outreach efforts is  
4  
5 fundamental to achieving these goals of promoting and practicing population health in Patient  
6  
7 Centered Medical Homes. The RER has established three objectives for this project: 1) develop  
8  
9 predictive models to identify patients at high risk of hospitalization or death, 2) create “risk of  
10  
11 hospitalization” patient profiles that provide information about their high-risk patients to the  
12  
13 general practitioners in the newly formed Patient Centered Medical Homes, and 3) assess the  
14  
15 extent to which these models and reports provide additional information useful in the  
16  
17 identification of patients who may benefit from case management or disease management.  
18  
19  
20  
21  
22

23 This paper will address the first of the three goals. We describe the development of a predictive  
24  
25 model using the RER’s regional longitudinal administrative health care database to help identify  
26  
27 patients who are most at risk of hospitalization for conditions that may be impacted through  
28  
29 improved patient care. This model will then be used to inform the providers associated with the  
30  
31 Patient Centered Medical Homes and aid in their planning for care management and  
32  
33 interventions that can reduce their patients’ likelihood of a preventable, high-cost hospitalization.  
34  
35  
36  
37  
38  
39

## 40 Methods

### 41 Study Data and Study Population

42  
43 The model was developed using the population-based longitudinal health care database of the  
44  
45 residents served by the RER Health Service in the years 2004 through 2012.<sup>5</sup> This  
46  
47 administrative database includes demographic information for all residents (gender, birth and  
48  
49 death dates, location of current residence, and primary care physician), hospital discharge  
50  
51 abstract data (ICD-9-CM diagnosis and procedure codes, and admission and discharge dates),  
52  
53  
54  
55  
56  
57

1  
2  
3 emergency room utilization information, outpatient pharmacy data at the individual prescription  
4 level, specialty care (laboratory, diagnostics, therapeutic procedures, rehabilitation, and specialist  
5 visits), home health data, and information on each primary care physician in the region. Each  
6 patient has an anonymous identifier assigned by the RER so that an individual's utilization can  
7 be tracked over time without jeopardizing patient privacy.  
8  
9

10  
11 The study population consisted of all residents of the RER who were at least 18 years of age and  
12 still alive as of 31st December 2011. Health care utilization data from 2011 and history variables  
13 using data from 2004 through 2010 were used to predict outcomes in 2012.  
14  
15

#### 16 17 18 19 20 21 22 23 24 25 26 Dependent Variable 27

28  
29 The dependent variable was defined as the occurrence of a hospitalization for problems that are  
30 potentially avoidable, or whose progression may have been avoided or delayed through  
31 appropriate patient care, or the death of the individual, either in or out of the hospital, for any  
32 reason in 2012. We included deaths in the dependent variable since we believe that, for  
33 example, a patient with coronary artery disease who dies secondary to an acute myocardial  
34 infarction, should be included in the dependent variable even if the death is out of the hospital.  
35 We decided to not limit the hospitalization to emergency admissions, since a planned admission  
36 may also be an indicator of a worsening medical problem. In order to operationally define the  
37 dependent variable, we (authors JSG and DZL) reviewed the Disease Staging<sup>6,7</sup> primary  
38 diagnostic category and severity stage of all day and inpatient hospital admissions (for adults age  
39 18+) in RER for one year, to select those admissions that should be included in the dependent  
40 variable.  
41  
42  
43  
44  
45  
46  
47  
48  
49  
50  
51  
52  
53  
54  
55  
56  
57  
58  
59  
60

1  
2  
3 Admissions to deliver a baby, admission for dental diseases or admissions for vague signs or  
4 symptoms with no identified etiology were excluded. Admissions for problems that are not  
5 predictable/preventable were excluded while those where screening may identify problems that  
6 can potentially be treated to avoid progression were included. For example, admissions for stage  
7 1, chronic cholecystitis or cholelithiasis were excluded, but admissions for advanced stage 2 or 3  
8 complications such as ascending cholangitis or pancreatitis were included.  
9

10  
11  
12 We felt that inclusion of hospitalization for cancer in the dependent variable should depend on  
13 the ability to either prevent or avoid progression of the disease. We therefore included colon  
14 cancer and cervical cancer in the definition because they are potentially preventable but excluded  
15 all other cancers where prevention/prediction is not currently possible.  
16  
17

18  
19  
20 Inclusion of injuries, burns, or toxic reaction to prescription or non-prescription drugs would  
21 ideally be based on the cause of these problems. Since the etiology of these problems is typically  
22 not available in the administrative data being used in this project, we made the decision to  
23 include or exclude based on our subjective judgment of the likelihood of preventability. For  
24 example, adverse drug reactions were included but burns were excluded from the definition of  
25 the dependent variable.  
26  
27

28  
29  
30 There is no obvious medical reason for a hospital admission for patients with stage 1 diabetes  
31 mellitus or stage 1 essential hypertension without complications. These problems are typically  
32 treatable in the outpatient setting. A hospitalization implies a potential problem in the care of  
33 these patients, so we decided to include these admissions as a part of the dependent variable.<sup>8</sup>  
34  
35  
36  
37  
38  
39  
40  
41  
42  
43  
44  
45  
46  
47  
48  
49  
50  
51  
52  
53  
54  
55  
56  
57  
58  
59  
60

### Independent Variables

A broad range of candidate predictor variables was developed taking advantage of the RER administrative data. The independent variables used for modeling were defined from the RER administrative data for the years 2004 through 2011. Demographic data included patient age, sex, and geographic location of residence. We developed a mapping to broad disease categories defined primarily in terms of the affected body system from home health care data, pharmacy data, and hospital discharge abstract data. (See Appendix 1.)

For those patients who had been hospitalized, more specific diagnostic data were available. We reviewed the classification of patients hospitalized historically using the Disease Staging diagnostic category and disease severity stages.<sup>6,7</sup> Based on the frequencies specific diagnostic category/stage predictor variables were defined for either specific stages of frequent diseases, or by combinations across similar categories. Predictor variables were defined based on the number of emergency room visits using the RER classifications system for the urgency of the visit.

Pharmacy data were used to identify polypharmacy<sup>9</sup> (defined as the simultaneous use of five or more active ingredients for at least 15 consecutive days), potential drug-drug interactions (DDI)<sup>10</sup> and potentially inappropriate medication use in patients<sup>11</sup> 65 years and older. Since cardiovascular disease is highly prevalent, we reviewed the use of cardiovascular drugs and created a variable for each of the following 11 classes of drugs (oral anti-coagulants, beta-blockers, angiotensin converting enzyme / angiotensin II receptor blockers, anti-platelets,

1  
2  
3 calcium channel blockers, anti-arrhythmics, digitalis glycosides, nitrates, diuretics, alpha-  
4  
5 blockers, statins) to account for the complexity of therapeutic regimen at the patient level.  
6  
7  
8  
9

10 To take advantage of the fact that the RER database includes multiple years of data, we created  
11 history variables using the utilization for each year of data available. Since we were working  
12 with the 2011 data to predict hospitalization or death in 2012, we created history variables based  
13 on 2004-2010 data. This set included 83 of the diagnostic category/stage variables as well as 11  
14 variables based on pharmacy utilization such as exposure to polypharmacy and use of  
15 cardiovascular drugs. If the individual had a history of a disease in any of the years from 2004 to  
16 2010 they were flagged as having a history of that disease and this was used as a potential  
17 predictor variable.  
18  
19  
20  
21  
22  
23  
24  
25  
26  
27  
28  
29  
30  
31

### 32 Modeling

33  
34

35 Logistic regression models were used to estimate predicted probabilities for the occurrence of an  
36 inpatient hospital stay for the selected conditions or death for individual patients. Risk of  
37 hospitalization or death, and the variables that relate to those risks are highly dependent on age  
38 and gender. Regression models were fit in each of 14 gender and age strata using SAS Version  
39 9.2 (SAS Institute, Cary NC). A stepwise process with relaxed covariate entry and retention  
40 criteria (inclusion p-value  $\leq 0.8$ , retention  $\leq 0.5$ ) was used. At each step in this process, an  
41 attempt is made to remove any unimportant variables from the model before adding a potentially  
42 important variable. Each addition or deletion of a variable to or from a potential model is a  
43 separate step and, at each step, a new model is fitted. This process results in a reduced, but robust  
44  
45  
46  
47  
48  
49  
50  
51  
52  
53  
54  
55  
56  
57  
58  
59  
60

1  
2  
3 set of independent variables that predict outcome or that might have importance as adjustment  
4  
5 terms for the model in each age/gender stratum.  
6  
7  
8  
9

### 10 11 12 Evaluation of the Models 13

14  
15 The predictive accuracy of the modelling was evaluated using C-statistics (the area under the  
16  
17 receiver operating characteristics curve), along with three measures traditionally used with  
18  
19 clinical screening tools: sensitivity, specificity and positive predictive value.  
20  
21

22  
23 C-statistics were used to evaluate the models in two ways. The first evaluation consisted of  
24  
25 fitting the model developed using utilization and demographic data from 2011, along with  
26  
27 historical variables based on 2004-2010 data, and outcomes (hospitalization or death) from 2012  
28  
29 and then computing a C-statistic to evaluate how the models performed at predicting those  
30  
31 outcomes on which the models were conditioned. However, this evaluation is not consistent with  
32  
33 evaluating how the data are used in practice. In practice, we have current predictor information,  
34  
35 but the outcomes have not been realized. To better estimate how the models are likely to perform  
36  
37 in this setting, we fit models to outcomes data up to a year prior to the most current available  
38  
39 (e.g., 2011 outcomes modelled with predictors from 2010, along with historical variables based  
40  
41 on 2004-2009 data). We then computed a C-statistic for projections made on the risk of  
42  
43 hospitalization or death outcomes (in 2012) using the next year's predictor information (in 2011).  
44  
45 This way, the models are forced to make projections into the future, but we have the actual  
46  
47 observed outcomes data to evaluate the modelling process as it would be used in practice. The  
48  
49 resulting C-statistics obtained from these two model runs were compared.  
50  
51  
52  
53  
54  
55  
56  
57  
58  
59  
60



In order to evaluate the performance of the model across different risk thresholds we classified predicted risk scores. “Very high risk” was defined as patients with a predicted risk of hospitalization or death in the following year of  $\geq 25\%$  while “high risk” was defined as patients with a predicted risk of hospitalization of 15-24%. These risk thresholds were selected after consultation with physicians practicing in the medical homes to yield a total of about 10% of the 1,500 patients enrolled with a typical primary care physician.

### **Results**

Among the 3,726,380 adult residents of Emilia Romagna at the end of 2011, 449,163 (12.1%) were hospitalized in 2012; 4.2% were hospitalized for the selected conditions defined earlier or died in 2012 (3.6% hospitalized, 1.3% died).

Table 1 shows the distribution of the demographics (age and gender), number of chronic conditions, body systems impacted by the selected chronic conditions, polypharmacy and inappropriate prescribing among the eligible RER residents, as of December 31, 2011. Table 1 also compares these characteristics of the total adult population of the region to the subgroups of the population classified in the “very high risk” and “high risk” categories. Based on the model results, 114,255 individuals were identified as having a predicted risk of hospitalization or death in 2012 of  $\geq 25\%$  and classified as “very high risk.” An additional 134,610 individuals had a predicted risk of hospitalization or death in 2012 of 15-24% and were classified as “high risk.”

**Table 1. Demographic and clinical characteristics of the Regione Emilia-Romagna population, overall and by risk category**

| Total Population* | Very High Risk** | High Risk** |
|-------------------|------------------|-------------|
|-------------------|------------------|-------------|

|                                                                                       | 3,726,380 |       | 114,255 |       | 134,610 |       |
|---------------------------------------------------------------------------------------|-----------|-------|---------|-------|---------|-------|
| <b>Gender</b>                                                                         | N.        | %     | N.      | %     | N.      | %     |
| Male                                                                                  | 1,788,048 | 48.0% | 54,357  | 47.6% | 61,803  | 45.9% |
| Female                                                                                | 1,938,332 | 52.0% | 59,898  | 52.4% | 72,807  | 54.1% |
| <b>Age groups</b>                                                                     |           |       |         |       |         |       |
| 18-24                                                                                 | 258,338   | 6.9%  | 76      | 0.1%  | 105     | 0.1%  |
| 25-34                                                                                 | 499,786   | 13.4% | 302     | 0.3%  | 391     | 0.3%  |
| 35-44                                                                                 | 732,626   | 19.7% | 1,137   | 1.0%  | 1,198   | 0.9%  |
| 45-54                                                                                 | 676,047   | 18.1% | 2,612   | 2.3%  | 2,485   | 1.8%  |
| 55-64                                                                                 | 550,689   | 14.8% | 5,391   | 4.7%  | 5,287   | 3.9%  |
| 65-74                                                                                 | 482,346   | 12.9% | 13,154  | 11.5% | 14,471  | 10.8% |
| 74-85                                                                                 | 364,369   | 9.8%  | 33,430  | 29.3% | 44,857  | 33.3% |
| 85+                                                                                   | 162,179   | 4.4%  | 58,153  | 50.9% | 65,816  | 48.9% |
| <b>Number of Chronic Conditions</b>                                                   |           |       |         |       |         |       |
| 0-1                                                                                   | 2,775,888 | 74.5% | 8,176   | 7.2%  | 24,618  | 18.3% |
| 2 or more                                                                             | 950,492   | 25.5% | 106,079 | 92.8% | 109,992 | 81.7% |
| 5 or more                                                                             | 99,337    | 2.7%  | 45,445  | 39.8% | 20,576  | 15.3% |
| <b>Selected Conditions/Body Systems</b>                                               |           |       |         |       |         |       |
| Cancer                                                                                | 99,328    | 2.7%  | 23,872  | 20.9% | 14,305  | 10.6% |
| Cardiovascular                                                                        | 967,796   | 26.0% | 96,157  | 84.2% | 103,749 | 77.1% |
| Male Genitourinary <sup>#</sup>                                                       | 130,609   | 7.3%  | 14,616  | 26.9% | 16,776  | 27.1% |
| Ear, Nose, Throat                                                                     | 5,364     | 0.1%  | 240     | 0.2%  | 242     | 0.2%  |
| Endocrine                                                                             | 429,528   | 11.5% | 40,653  | 35.6% | 37,471  | 27.8% |
| Eye                                                                                   | 114,117   | 3.1%  | 9,558   | 8.4%  | 13,478  | 10.0% |
| Gastrointestinal                                                                      | 580,946   | 15.6% | 74,718  | 65.4% | 66,305  | 49.3% |
| Gynecologic <sup>##</sup>                                                             | 21,806    | 1.1%  | 333     | 0.6%  | 405     | 0.6%  |
| Hematologic                                                                           | 45,022    | 1.2%  | 15,353  | 13.4% | 6,591   | 4.9%  |
| Hepatobiliary                                                                         | 24,785    | 0.7%  | 6,477   | 5.7%  | 3,306   | 2.5%  |
| Immunologic                                                                           | 3,281     | 0.1%  | 464     | 0.4%  | 273     | 0.2%  |
| Infectious Disease                                                                    | 4,723     | 0.1%  | 2,207   | 1.9%  | 727     | 0.5%  |
| Musculoskeletal                                                                       | 419,184   | 11.2% | 43,436  | 38.0% | 41,000  | 30.5% |
| Neurologic                                                                            | 173,751   | 4.7%  | 34,494  | 30.2% | 24,838  | 18.5% |
| Psychological                                                                         | 291,308   | 7.8%  | 43,387  | 38.0% | 33,715  | 25.0% |
| Respiratory                                                                           | 176,830   | 4.7%  | 39,082  | 34.2% | 21,763  | 16.2% |
| Skin                                                                                  | 28,339    | 0.8%  | 7,645   | 6.7%  | 3,008   | 2.2%  |
| Urogenital                                                                            | 37,728    | 1.0%  | 16,501  | 14.4% | 5,740   | 4.3%  |
| <b>Polypharmacy<sup>^</sup></b>                                                       | 609,278   | 16.4% | 92,153  | 80.7% | 92,156  | 68.5% |
| <b>Any potentially inappropriate medications (age 65 years or older)<sup>^^</sup></b> | 257,033   | 25.5% | 51,055  | 48.7% | 49,003  | 39.2% |

1  
2  
3 \* Adults (age 18 or older) and alive at 31 December 2011.

4 \*\* "Very high risk" was defined as patients with a predicted risk of hospitalization or death in the following year of  
5  $\geq 25\%$  while "high risk" was defined as patients with a predicted risk of hospitalization of 15-24%.

6 # Men only.

7 ## Women only.

8 ^ Polypharmacy is defined as the simultaneous use of five or more active ingredients for at least 15 consecutive  
9 days.

10 ^^ The list of potentially inappropriate medications can be found in: Maio V, Del Canale S, Abouzaid S. Using  
11 Explicit Criteria to Evaluate the Quality of Prescribing in Elderly Italian Outpatients: A Cohort Study. *Journal of*  
12 *Clinical Pharmacy and Therapeutics* 2010;35:219-229.

13  
14  
15  
16  
17  
18 There was little difference across the risk categories by gender. Age distributions for the "very  
19 high risk" and "high risk" groups were shifted more towards the older age groups than those in  
20 the overall study population. Residents age 85 or older represented about 4.5% of the RER  
21 population, but about 50% of the "very high" and "high" predicted risk groups. More than 75%  
22 of the residents over age 85 were classified as "very high" or "high" risk. However, age alone  
23 was not sufficient to predict their risk. For example, residents between 75 and 84 years of age  
24 made up 23% of the "very high" risk group and 41% of the "high" risk group, but over 85% of  
25 the residents in this age category had neither "very high" nor "high" predicted risk.  
26  
27  
28  
29  
30  
31  
32  
33  
34  
35  
36  
37

38 Across age and gender strata, demographics and health care utilization experience in 2011 were  
39 the most commonly used independent variables for predicting hospitalization or death in 2012.  
40 Selected history variables flagging chronic problems such as cardiovascular disease, diabetes  
41 mellitus and chronic renal failure and a history of prescriptions for cardiovascular medications  
42 and polypharmacy were also significant predictors.  
43  
44  
45  
46  
47  
48  
49  
50

51 The residents in the two higher risk groups were more likely than others to have multiple chronic  
52 diseases and to experience polypharmacy and inappropriate medication use. The residents  
53 identified as "very high risk" or "high risk" by the model also showed a number of striking  
54  
55  
56  
57

1  
2  
3 differences from others in terms of the occurrence of some of the most prevalent health  
4 conditions by type and body system. Although cardiovascular conditions were not uncommon in  
5 the total adult population (26.0%), they were far more common among those classified as “very  
6 high risk” and “high risk” (84.2% and 77.1%, respectively). Similarly, gastrointestinal conditions  
7 affected 15.6% of the total population, but were diagnosed in 65.4% of the “very high risk” and  
8 49.3% of the “high risk” patients. Cancer occurred in 2.7% of the total population, but 20.9% of  
9 the “very high risk” and 10.6% of the “high risk” patients had a cancer diagnosis. Mental health  
10 problems were identified in 7.8% of the adult population, but in 34.2% of the “very high risk”  
11 and 25.0% of the “high risk” patients.  
12  
13  
14  
15  
16  
17  
18  
19  
20  
21  
22  
23

24  
25 The C-statistic for the model of 2012 outcomes developed using 2011 predictors and the  
26 C-statistic based on the parameters from the model of 2011 outcomes regressed on 2010  
27 predictors applied to the 2011 predictors and 2012 outcomes were very similar (0.856 and 0.853,  
28 respectively). These results suggest that the relationship between predictors and risk of  
29 hospitalization changed little in one year and that model parameters developed in a prior year can  
30 be used reliably with the most current year’s data to predict unknown outcomes in the next year  
31 with only a minimal loss in performance in this population.  
32  
33  
34  
35  
36  
37  
38  
39  
40  
41  
42

43 Table 2 shows the sensitivity, specificity, positive predictive value and number of true positives  
44 for the model at the two selected cut-off points. The sensitivity (percentage of patients actually  
45 hospitalized who had been identified by the model as having a predicted risk higher than the cut-  
46 off point) was 29.8% for those with the “very high” risk scores. This percentage represents  
47 46,950 of the 157,550 residents of the region who were hospitalized for a selected condition or  
48 died in 2012. If we modify the risk score threshold to include individuals with a predicted risk of  
49  
50  
51  
52  
53  
54  
55  
56  
57  
58  
59  
60

hospitalization for selected conditions or death of  $\geq 15\%$  (i.e., both the “very high risk” and the “high risk” patients) the sensitivity is .471. The true negative rate (specificity) is very high for both risk thresholds (.981 and .951, respectively).

| Measure                                      | Cut-off points for comparison |                                   |
|----------------------------------------------|-------------------------------|-----------------------------------|
|                                              | "Very high risk"*             | "Very high risk"* + "High risk"** |
| <b>Sensitivity<sup>#</sup></b>               | 0.298                         | 0.471                             |
| <b>Specificity<sup>##</sup></b>              | 0.981                         | 0.951                             |
| <b>Positive Predictive Value<sup>^</sup></b> | 0.411                         | 0.298                             |
| <b>True positives<sup>^^</sup></b>           | 46,950                        | 74,196                            |

\* "Very high risk" is defined as patients with a predicted risk of hospitalization of  $\geq 25\%$ .  
 \*\* "Very high risk" + "High risk", is defined as patients with a predicted risk of hospitalization of  $\geq 15\%$ .  
 # Sensitivity is defined as the proportion of those hospitalized who were predicted to be hospitalized (true positive rate).  
 ## Specificity is the proportion of those not hospitalized who were not predicted to be hospitalized (true negative rate).  
 ^ Positive Predictive Value is the proportion of those predicted to be hospitalized who were actually hospitalized.  
 ^^ True positives are the number of residents who were predicted to be at risk for hospitalization at the predicted risk threshold and were actually hospitalized.

The model appears to be well calibrated across levels of risk. Figure 1 depicts the RER population divided into groups by deciles of predicted risk of hospitalization or death from the models. The observed prevalence of hospitalization or death is compared to the average predicted risk among individuals in each of the ten predicted risk groups. For example, the overall rate of hospitalization for the selected conditions or death in 2012 was 4.2%. For those patients in the highest predicted risk decile group, the average predicted risk was 23.9% and the actual prevalence of hospitalization or death was 24.2%. (Regression coefficients and

1  
2  
3 significance levels of independent variables for models for each of 14 age and gender strata are  
4 displayed in Appendix 2.)  
5  
6  
7

8  
9 [Insert Figure 1 about here]  
10  
11  
12  
13

## 14 15 **Discussion** 16

17 We have developed a population-based model that identifies the risk of hospitalization for all  
18 adult RER residents and does so with a level of performance ( $c=0.85$ ) as high as, or higher than,  
19 similar models. In addition, we believe that the definition of the dependent variable chosen for  
20 our models increases the probability that they are identifying patients who risk can potentially be  
21 improved by appropriate care. A systematic review by Kansagara<sup>12</sup> of models designed to  
22 predict readmissions, showed C-statistic results in the range of 0.55 to 0.83. Recent work by  
23 Billings et al<sup>13</sup> to develop models predictive of emergent admissions in the UK had results  
24 ranging from 0.73 to 0.78. Li Wang, et al. (2013),<sup>14</sup> using information available through the  
25 United States Department of Veterans Affairs that also included lab data, demonstrated C-  
26 statistics of 0.81 and 0.79, respectively, for their models of 90-day or 12-month hospitalization or  
27 death outcomes. At a predicted risk of  $\geq 25\%$  our model had a Positive Predictive Value (PPV)  
28 of .411. Billings et al<sup>14</sup> reported a PPV of .417 at a risk threshold of 30. There is a trade-off in  
29 using our model, or any predictive model, between the threshold for follow-up and predictive  
30 accuracy. A lower risk threshold would identify more patients but with a lower prevalence of  
31 hospitalization or death.  
32  
33  
34  
35  
36  
37  
38  
39  
40  
41  
42  
43  
44  
45  
46  
47  
48  
49  
50  
51  
52  
53  
54  
55  
56  
57  
58  
59  
60

1  
2  
3 Although previous studies have developed models predictive of hospital care, these models fall  
4 short of the needs of the Patient Centered Medical Homes being implemented in RER. Typically,  
5 these models have focused on specific age groups,<sup>15</sup> conditions, or types of admissions, such as  
6 emergent<sup>14</sup> or unplanned admissions or rehospitalizations, or health insurance plans in the United  
7 States, including private insurance plans, Medicare and Medicaid plans.<sup>16,17</sup> The models we have  
8 developed are applied to the entire adult population of RER. They use existing administrative  
9 data, which makes them cost effective to apply.  
10  
11  
12  
13  
14  
15  
16  
17  
18  
19

20 Patient Centered Medical Homes, including those instituted in RER, are responsible for  
21 addressing the needs of their population and making the best use of their finite resources to  
22 accomplish this. Preventing unnecessary admissions could improve both the quality of care and  
23 health status of the enrolled population, and result in a substantial savings. To accomplish this,  
24 predictive models and risk stratification tools such as those developed for this project are needed  
25 to identify patients at risk of preventable admissions and provide information that can be used by  
26 the medical homes to help manage care.  
27  
28  
29  
30  
31  
32  
33  
34  
35  
36

37 There are some limitations to the model. The model is developed from administrative data.  
38 Administrative data are collected for reimbursement and tracking utilization and not for medical  
39 research. They lack the clinical specificity that would be desirable in assessing an individual's  
40 medical problems. Patients with medical problems who have not used the services included in  
41 the database cannot be identified. While the hospital discharge abstract data do include  
42 diagnostic information coded using ICD-9-CM, no similar data are available for outpatient  
43 encounters in the RER database. The mortality data available for this project did not include  
44 information about cause of death. Therefore, some proportion of patients whose death was not  
45  
46  
47  
48  
49  
50  
51  
52  
53  
54  
55  
56  
57  
58  
59  
60

1  
2  
3 predictable were included, limiting model performance. In addition, our models use prior  
4  
5 utilization among the predictor variables. With the administrative data we cannot distinguish  
6  
7 between appropriate and inappropriate treatment which may bias our results.  
8  
9

10  
11 Despite the limitations of administrative data, they have many advantages for this project: they  
12  
13 are readily available, relatively inexpensive to analyze and cover large populations over many  
14  
15 years. They are ideal for uncovering patterns of care. If information from the medical records is  
16  
17 needed, the results of these analyses can then be supplemented by focused clinical reviews at the  
18  
19 local level. Also, The RER has a system in place to monitor the quality of diagnosis and  
20  
21 procedure coding in their hospital discharge abstract data. Controls at both the hospital and  
22  
23 regional level assess the validity of coding and the consistency of codes assigned such as  
24  
25 congruity between sex, age and diagnosis and between diagnosis and procedure. The existence  
26  
27 of the RER administrative database made it feasible to develop the models described in this  
28  
29 article at relatively low cost and to update the models over time without additional data  
30  
31 collection that others have found necessary.<sup>13</sup>  
32  
33  
34  
35  
36  
37

38 Currently, these risk scores are being integrated with other information in profiles of high-risk  
39  
40 patients furnished to providers in 12 newly formed medical homes, including 83 primary care  
41  
42 physicians serving a total of about 100,000 patients, in the Parma Local Health Authority located  
43  
44 in RER. Along with the risk scores, this information includes data about previous  
45  
46 hospitalizations, use of referrals, medications, long-term care and home care services, and a  
47  
48 number of process-like quality indicators for diabetic and cardiovascular patients, and for  
49  
50 appropriate medication use in older patients.  
51  
52  
53  
54  
55  
56  
57  
58  
59  
60



1  
2  
3 We believe that the Italian health care system offers a number of advantages in the goal of  
4 reducing potentially avoidable hospitalization. Every Italian must enroll with a primary care  
5 physician. The population is quite stable with modest levels of change of residence or change of  
6 primary care physician. Every Italian is entitled to health care with little or no cost at the point  
7 of service. There is no problem with loss of, or change in, insurance coverage. Primary care  
8 physicians are primarily paid on a per capita basis. But the Emilia-Romagna region has the  
9 ability to negotiate incentive payments designed to address and monitor improvements in  
10 medical management such as that addressed in our study.  
11  
12  
13  
14  
15  
16  
17  
18  
19  
20  
21  
22

23 Of course, model results need to lead to effective interventions to have a positive impact on  
24 patient care. To this end, we are working with the physicians, nurses, and other health care  
25 professionals as well as the administration of the newly formed Medical Homes in Parma to  
26 assist them in understanding how to use the results of these models and in developing potentially  
27 effective interventions. The individual profiles of high risk patients provided to the health care  
28 team in the Medical Homes allow them to trigger specific actions such as inviting patients to  
29 enroll in disease management programs for chronic problems such as heart failure, chronic  
30 obstructive pulmonary disease, or diabetes mellitus, activating home health assistance, initiating  
31 a medication review, or recommending that the patient come in for an office visit. An evaluation  
32 of the use and usefulness of the profiles and intervention is under way.  
33  
34  
35  
36  
37  
38  
39  
40  
41  
42  
43  
44  
45  
46  
47

48 In summary, these models provide a means of identifying patients at high risk for hospitalization.  
49 The risk predictions, in conjunction with the risk profile, show promise as a useful organizational  
50 tool for the regional Patient Centered Medical Homes to develop and implement proactive case  
51 management and disease management programs. The RER is reviewing the results of the Parma  
52  
53  
54  
55  
56  
57  
58  
59  
60

1  
2  
3 Local Health Authority pilot project of the profiles. Once their usefulness has been further  
4  
5 evaluated, their use will be expanded to other Medical Homes in development in the other Local  
6  
7 Health Authorities in the Emilia-Romagna region. If similar data are available, these models can  
8  
9 be applied in other Italian regions and other countries investing in organization similar to the  
10  
11 Patient Centered Medical Home.  
12  
13  
14  
15  
16  
17  
18  
19  
20  
21  
22  
23  
24  
25  
26  
27  
28  
29  
30  
31  
32  
33  
34  
35  
36  
37  
38  
39  
40  
41  
42  
43  
44  
45  
46  
47  
48  
49  
50  
51  
52  
53  
54  
55  
56  
57  
58  
59  
60

For peer review only

**Figure 1 Legend:**

**Figure 1. Model calibration: Predicted risk and observed prevalence of hospitalization or death in 2012 by predicted risk decile groups.**

**Contributorship statement:** DZL, RG, VM, and JSG were responsible for the conceptualization of this project. MR, JM, and ML were responsible for creation of the datasets used in this project. DZL, VM, MR, and JSG were responsible for the definition of analytical variables. SWK, MR, ML and JM were responsible for modeling and statistical analysis. DZL managed the research team. RG and JSG advised on the analyses and results. All authors contributed to the preparation of the manuscript.

**Competing interests:** All authors have completed the Unified Competing Interest form and declare grants from the Regione Emilia-Romagna (Louis, Robeson, McAna, Maio, Keith, Liu, Gonnella) during the conduct of the study. Louis and Gonnella declare personal fees from Truven Health Analytics, The National School of Public Health, Portugal, INSIEL Mercato.

**Funding:** This research was funded by the Agenzia Sanitaria e Sociale of the Emilia-Romagna Region, Italy. The resulting models are being used by the Local Health Authority of Parma, Italy and the Patient Centered Medical Homes located in the Parma Local Health Authority.

**Data Sharing:** No additional data available.

1  
2  
3  
4  
5 1 Saltman RB, Rico A, Boerma W, eds. Primary care in the driver's seat? Organizational reform  
6  
7 in European primary care. New York, New York: World Health Organization European  
8  
9 Observatory on Health Systems and Policies Series 2006.

10  
11  
12 2 Smith J, Goodwin N. Towards managed primary care: The role and experience of primary care  
13  
14 organizations. Burlington, VT: Ashgate Publishing Company 2006.

15  
16  
17 3 Defining the PCMH. Agency for Healthcare Research and Quality Web site.

18  
19  
20 [http://www.pcmh.ahrq.gov/portal/server.pt/community/pcmh\\_\\_home/1483/pcmh\\_defining\\_the\\_](http://www.pcmh.ahrq.gov/portal/server.pt/community/pcmh__home/1483/pcmh_defining_the_)  
21  
22 [pcmh\\_v2](http://www.pcmh.ahrq.gov/portal/server.pt/community/pcmh__home/1483/pcmh_defining_the_) (accessed June 30, 2013).

23  
24  
25 4 Lo Scalzo A, Donatini A, Orzella I, et al. Italy: Health system review. *Health Syst Transit*.  
26  
27 2009;**11**(6):1-216.

28  
29  
30 5 The Emilia-Romagna Regional Health Service and the new welfare system: Facilities,  
31  
32 expenditure, and activities as of 31.12.2010. Programs, agreements and organisational models.  
33  
34 Regione Emilia-Romagna Assessorato Politiche per la Salute. Bologna, Italy 2012.

35  
36  
37 6 Gonnella JS, Hornbrook MC, Louis DZ. Staging of Disease: A Case-Mix Measurement. *JAMA*  
38  
39 1984;**251**:637-44.

40  
41  
42 7 Gonnella JS, Louis DZ, Gozum ME, et al, eds. Clinical Criteria for Disease Staging. 6th  
43  
44 edition. Ann Arbor, MI: Truven Health Analytics 2012.

45  
46  
47 8 Louis DZ, F Taroni, R Melotti, et al. Increasing appropriateness of hospital admissions in the  
48  
49 Emilia-Romagna region of Italy. *J Health Serv Res Policy* 2008;**13**(4):202-8.

1  
2  
3  
4  
5 9 Slabaugh L, Maio V, Templin M, et al. Prevalence and risk of polypharmacy amongst elderly  
6 primary care patients in Regione Emilia-Romagna, Italy. *Drug Aging* 2010;**27**:1019-28.

7  
8  
9  
10 10 Gagne JJ, Maio V, Rabinowitz C. Prevalence and Predictors of Potential Drug-Drug  
11 Interactions among Ambulatory Patients in Regione Emilia-Romagna, Italy. *J Clin Pharm Ther*  
12 2008;**33**:141-51.

13  
14  
15  
16  
17  
18 11 Maio V, Del Canale S, Abouzaid S. Using Explicit Criteria to Evaluate the Quality of  
19 Prescribing in Elderly Italian Outpatients: A Cohort Study. *J Clin Pharm Ther* 2010;**35**:219-29.

20  
21  
22  
23  
24 12 Kansagara D, Englander H, Salanitro A, et al. Risk prediction models for hospital  
25 readmission: A systematic review. Washington, DC: Department of Veterans Affairs US 2011.

26  
27  
28  
29 13 Billings J, Georghiou T, Blunt I, et al. Choosing a model to predict hospital admission: An  
30 observational study of new variants of predictive models for case finding. *BMJ Open*  
31 2013;**3**(8):e003352. doi: 10.1136/bmjopen-2013-003352 [published Online First: 26 August  
32 2013].

33  
34  
35  
36  
37  
38 14 Wang L, Porter B, Maynard C, et al. Predicting risk of hospitalization or death among patients  
39 receiving primary care in the Veterans Health Administration. *Med Care* 2013;**51**(4):368-73.

40  
41  
42  
43  
44  
45 15 Inouye SK, Zhang Y, Jones RN, et al. Risk factors for hospitalization among community-  
46 dwelling primary care older patients: development and validation of a predictive model. *Med*  
47 *Care* 2008;**46**(7):726-31.

48  
49  
50  
51  
52  
53 16 Lemke KW, Weiner JP, Clark JM. Development and validation of a model for predicting  
54 inpatient hospitalization. *Med Care* 2012;**50**(2):131-9.

1  
2  
3  
4  
5 17 McAna JF, Crawford AG, Novinger BW, et al. A predictive model of hospitalization risk  
6  
7 among disabled Medicaid enrollees. *Am J Manag Care* 2013;**19**(5):166-74.  
8  
9  
10  
11  
12  
13  
14  
15  
16  
17  
18  
19  
20  
21  
22  
23  
24  
25  
26  
27  
28  
29  
30  
31  
32  
33  
34  
35  
36  
37  
38  
39  
40  
41  
42  
43  
44  
45  
46  
47  
48  
49  
50  
51  
52  
53  
54  
55  
56  
57  
58  
59  
60

For peer review only

1  
2  
3 **Predicting Risk of Hospitalization or Death: A Retrospective -Population Based Analysis**  
4  
5  
6  
7  
8  
9

10 Daniel Z. Louis<sup>1</sup>, Mary Robeson<sup>1</sup>, John McAna<sup>2</sup>, Vittorio Maio<sup>2</sup>, Scott W. Keith<sup>3</sup>, Mengdan  
11 Liu<sup>1</sup>, Joseph S. Gonnella<sup>1</sup>, Roberto Grilli<sup>4</sup>  
12  
13

14  
15  
16  
17  
18 <sup>1</sup>Center for Research in Medical Education and Health Care, [Jefferson-Sidney Kimmel](#) Medical  
19 College [of at](#) Thomas Jefferson University. 1015 Walnut Street, Suite 319. Philadelphia, PA  
20 19107, USA  
21

22  
23 <sup>2</sup>Jefferson School of Population Health, Thomas Jefferson University. 901 Walnut Street, 10<sup>th</sup>  
24 Floor. Philadelphia, PA 19107, USA  
25

26  
27 <sup>3</sup>Department of Pharmacology & Experimental Therapeutics, Division of Biostatistics, Thomas  
28 Jefferson University. 1015 Chestnut Street, Suite M-100. Philadelphia, PA 19107, USA  
29

30  
31 <sup>4</sup>Agenzia Sanitaria e Sociale Regione Emilia-Romagna, Viale Aldo Moro, 21. Bologna, 40128  
32 Italy.  
33  
34  
35  
36

37 **Corresponding author:** Daniel Z. Louis, [Jefferson-Sidney Kimmel](#) Medical College, 1015  
38 Walnut Street, Suite 319, Philadelphia, PA 19107. USA; Tel: 215-955-6959,  
39 [daniel.louis@jefferson.edu](mailto:daniel.louis@jefferson.edu)  
40

41  
42 **Copyright:** The corresponding author has the right to grant on behalf of all authors and does  
43 grant on behalf of all authors, an exclusive license (non-exclusive for Dr. Grilli as a government  
44 employee) on a worldwide basis to the BMJ publishing Group Ltd to permit this article (if  
45 accepted) to be published in BMJ editions and any other BMJ PGL products and sublicenses such  
46 use and exploit all subsidiary rights, as set out in our license.  
47  
48

49  
50 **Ethical approval:** This study was approved by the Institutional Review Board of Thomas  
51 Jefferson University as an expedited retrospective database/record review. The IRB granted a  
52 waiver of informed consent.  
53  
54  
55  
56  
57  
58  
59  
60

## Abstract

**Objectives:** Develop predictive models using an administrative health care database that provide information for Patient Centered Medical Homes to proactively identify patients at risk of hospitalization for conditions that may be impacted through improved patient care.

**Design:** Retrospective health care utilization analysis with multivariate logistic regression models.

**Data:** A population-based longitudinal database of residents served by the Emilia-Romagna, Italy health service in the years 2004-2012 including demographic information and utilization of health services by 3,726,380 people age  $\geq 18$  years.

**Outcome measures:** Models designed to predict risk of hospitalization or death in calendar year 2012 for problems that are potentially avoidable were developed and evaluated using the area under the receiver operating curve C-statistic, in terms of their sensitivity, specificity, and positive predictive value, and for calibration to assess performance across levels of predicted risk.

**Results:** Among the 3,726,380 adult residents of Emilia-Romagna at the end of 2011, 449,163 (12.1%) were hospitalized in 2012; 4.2% were hospitalized for the selected conditions or died in 2012 (3.6% hospitalized, 1.3% died). The C-statistic for ~~the model~~ predicting 2012 outcomes was 0.856. The model was well calibrated across categories of predicted risk. For those patients in the highest predicted risk decile group, the average predicted risk was 23.9% and the actual prevalence of hospitalization or death was 24.2%.



1  
2  
3 **Conclusions:** We have developed a population-based model using a longitudinal administrative  
4 database that identifies the risk of hospitalization for residents of the Emilia-Romagna region  
5  
6 with a level of performance as high as, or higher than, similar models. The results of this  
7  
8 model, along with profiles of patients identified as high risk are being provided to the physicians  
9  
10 and other health care professionals associated with the Patient Centered Medical Homes to aid in  
11  
12 planning for care management and interventions that may reduce their patients' likelihood of a  
13  
14 preventable, high-cost hospitalization.  
15  
16  
17  
18  
19  
20  
21  
22

### 23 **Strengths and Limitations of this study:**

- 24 • This study included the entire adult population of the Emilia-Romagna Region of Italy,  
25 over 3.7 million people.
- 26 • The study used an existing longitudinal administrative health care database with both the  
27 advantage of much lower cost than new data collection and the disadvantage of potential  
28 errors in administrative data.
- 29 • The results of the study are being used to assist in the development of newly formed  
30 Patient Centered Medical Homes.  
31  
32  
33  
34  
35  
36  
37

38 **Keywords:** hospitalization, risk, medical home, patient-centered care  
39

40 **Word Count:** 3,952864 (excluding title page, abstract, references, figure 1, ~~and~~ table 1 and table  
41 2s.)  
42  
43  
44  
45  
46  
47  
48  
49  
50  
51  
52  
53  
54  
55  
56  
57  
58  
59  
60

## Introduction

The predominant healthcare delivery system, which has been a passive model, reacting to patients' problems, is shifting to a more proactive model designed to take the initiative in providing care for an increasingly older population that has a greater prevalence of chronic conditions, often with multiple medical and social needs. These changes are driving the reorganization of the primary care system, emphasizing coordination and cooperation among healthcare professionals.<sup>1,2,3</sup> Among the approaches to addressing this need has been the establishment of ~~primary care organizations incorporating integrated teams of physicians and other healthcare professionals that “seek to increase the influence of primary care professionals, and in particular general practitioners (GPs), in health planning and resource allocation.”~~ ~~Prominent among these new models of primary care is the Patient Centered Medical Homes, an~~ organizations in which ~~a~~ teams of healthcare providers ~~is~~ are engaged in delivering comprehensive, coordinated, patient-centered care to patient defined populations.

Primary care has a central role in the Italian National Health Service (NHS). Twenty one regional governments are responsible for ensuring the delivery of a health benefits package through a network of geographically defined, population-based Local Health Authorities. Primary care physicians work for these authorities as independent contractors and act as “gatekeepers” for specialty and other referral services for their patients.<sup>4</sup>

With the belief that a strong primary care system is conducive to improving population health, the NHS initiated reforms that encouraged primary care physicians to organize into collaborative arrangements. To this end, the Regione Emilia-Romagna (RER), a large northern region with a population of about 4.5 million, has recently launched a plan in its 11 Local Health Authorities to

1  
2  
3 establish Patient-Centered Medical Homes to better coordinate patient care and help patients  
4  
5 avoid unnecessary hospitalizations.  
6  
7

8  
9 ~~The identification of those patients who would benefit most from outreach efforts is fundamental~~  
10 ~~to achieving these goals of promoting and practicing population health in Patient-Centered~~  
11 ~~Medical Homes. To accomplish this, predictive models and risk stratification tools are needed to~~  
12 ~~identify patients at risk of a worsening of their health status. According to Knutson and Bella,<sup>5</sup>~~  
13 ~~“Predictive models are data-driven, decision-support tools that estimate an individual’s future~~  
14 ~~potential health care costs and/or opportunities for care management.” A good model will~~  
15 ~~identify as many of these patients as possible while excluding those for whom these interventions~~  
16 ~~would be unnecessary or ineffective.~~  
17  
18  
19  
20  
21  
22  
23  
24  
25  
26  
27

28 The identification of those patients who would benefit most from outreach efforts is fundamental  
29 to achieving these goals of promoting and practicing population health in Patient-Centered  
30 Medical Homes. The RER has established three objectives for this project: 1) develop predictive  
31  
32 models to identify patients at high risk of hospitalization or death, 2) create “risk of  
33  
34 hospitalization” patient profiles that provide information about their high-risk patients to the  
35  
36 general practitioners in the newly formed Patient-Centered Medical Homes, and 3) assess the  
37  
38 extent to which these models and reports provide additional information useful in the  
39  
40 identification of patients who may benefit from case management or disease management.  
41  
42  
43  
44  
45  
46  
47

48  
49 This paper will address the first of the three goals. We describe the development of a predictive  
50  
51 model using the RER’s regional longitudinal administrative health care database to help identify  
52  
53 patients who are most at risk of hospitalization for conditions that may be impacted through  
54  
55 improved patient care. This model will then be used to inform the providers associated with the  
56  
57

1  
2  
3 Patient-Centered Medical Homes and aid in their planning for care management and  
4  
5 interventions that can reduce their patients' likelihood of a preventable, high-cost hospitalization.  
6  
7  
8  
9

## 10 11 **Methods**

### 12 13 Study Data and Study Population

14  
15  
16 The model was developed using the population-based longitudinal health care database of the  
17 residents served by the RER Health Service in the years 2004 through 2012.<sup>6</sup> This  
18 administrative database includes demographic information for all residents (gender, birth and  
19 death dates, location of current residence, and primary care physician), hospital discharge  
20 abstract data (ICD-9-CM diagnosis and procedure codes, and admission and discharge dates),  
21 emergency room utilization information, outpatient pharmacy data at the individual prescription  
22 level, specialty care (laboratory, diagnostics, therapeutic procedures, rehabilitation, and specialist  
23 visits), home health data, and information on each primary care physician in the region. Each  
24 patient has an anonymous identifier assigned by the RER so that an individual's utilization can  
25 be tracked over time without jeopardizing patient privacy.  
26  
27  
28  
29  
30  
31  
32  
33  
34  
35  
36  
37  
38  
39

40  
41 The study population consisted of all residents of the RER who were at least 18 years of age and  
42 still alive as of 31st December 2011. [Health care utilization data from 2011 and history variables  
43 using data from 2004 through 2010 were used to predict outcomes in 2012.](#)  
44  
45  
46  
47  
48  
49  
50

### 51 Dependent Variable

52  
53  
54 The dependent variable was defined as the occurrence of a hospitalization for problems that are  
55  
56  
57  
58  
59  
60

1  
2  
3 potentially avoidable, or whose progression may have been avoided or delayed through  
4  
5 appropriate patient care, or the death of the individual, either in or out of the hospital, for any  
6  
7  
8 reason in 2012. [We included deaths in the dependent variable since we believe that, for](#)  
9  
10 [example, a patient with coronary artery disease who dies secondary to an acute myocardial](#)  
11 [infarction, should be included in the dependent variable even if the death is out of the hospital.](#)  
12  
13

14  
15 We decided to not limit the hospitalization to emergency admissions, since a planned admission  
16  
17 may also be an indicator of a worsening medical problem. In order to operationally define the  
18  
19 dependent variable, we (authors JSG and DZL) reviewed the Disease Staging<sup>7,8</sup> primary  
20  
21 diagnostic category and severity stage of all day and inpatient hospital admissions (for adults age  
22  
23 18+) in RER for one year, to select those admissions that should be included in the dependent  
24  
25 variable.  
26  
27

28  
29  
30 [Deliveries](#) [Admissions to deliver a baby](#), admission for dental diseases or admissions for vague  
31  
32 signs or symptoms with no identified etiology were excluded. Admissions for problems that are  
33  
34 not predictable/preventable were excluded while those where screening may identify problems  
35  
36 that can potentially be treated to avoid progression were included. For example, admissions for  
37  
38 stage 1, chronic cholecystitis or cholelithiasis were excluded, but admissions for advanced stage  
39  
40 2 or 3 complications such as ascending cholangitis or pancreatitis were included.  
41  
42  
43  
44

45 We felt that inclusion of hospitalization for cancer in the dependent variable should depend on  
46  
47 the ability to either prevent or avoid progression of the disease. We therefore included colon  
48  
49 cancer and cervical cancer in the definition because they are potentially preventable but excluded  
50  
51 all other cancers where prevention/prediction is not currently possible.  
52  
53  
54

55 Inclusion of injuries, burns, or toxic reaction to prescription or non-prescription drugs would  
56  
57

1  
2  
3 ideally be based on the cause of these problems. Since the etiology of these problems is typically  
4  
5 not available in the administrative data being used in this project, we made the decision to  
6  
7 include or exclude based on our subjective judgment of the likelihood of preventability. For  
8  
9 example, adverse drug reactions were included but burns were excluded from the definition of  
10  
11 the dependent variable.  
12  
13

14  
15  
16 There is no obvious medical reason for a hospital admission for patients with stage 1 diabetes  
17  
18 mellitus or stage 1 essential hypertension without complications. These problems are typically  
19  
20 treatable in the outpatient setting. A hospitalization implies a potential problem in the care of  
21  
22 these patients, so we decided to include these admissions as a part of the dependent variable.<sup>9</sup>  
23  
24  
25  
26  
27  
28  
29  
30

### 31 Independent Variables

32  
33 A broad range of candidate predictor variables was developed taking advantage of the RER  
34  
35 administrative data. The independent variables used for modeling were defined from the RER  
36  
37 administrative data for the years 2004 through 2011. Demographic data included patient age,  
38  
39 sex, and geographic location of residence. We developed a mapping to broad disease categories  
40  
41 defined primarily in terms of the affected body system from home health care data, pharmacy  
42  
43 data, and hospital discharge abstract data. (See Appendix 1.)  
44  
45  
46  
47  
48  
49

50 For those patients who had been hospitalized, more specific diagnostic data were available. We  
51  
52 reviewed the classification of patients hospitalized historically using the Disease Staging  
53  
54 diagnostic category and disease severity stages.<sup>7,8</sup> Based on the frequencies specific diagnostic  
55  
56

1  
2  
3 category/stage predictor variables were defined for either specific stages of frequent diseases, or  
4  
5 by combinations across similar categories. Predictor variables were defined based on the number  
6  
7 of emergency room visits using the RER classifications system for the urgency of the visit.  
8  
9

10  
11  
12 Pharmacy data were used to identify polypharmacy<sup>10</sup> (defined as the simultaneous use of five or  
13  
14 more active ingredients for at least 15 consecutive days), potential drug-drug interactions  
15  
16 (DDI)<sup>11</sup> and potentially inappropriate medication use in patients<sup>12</sup> 65 years and older. Since  
17  
18 cardiovascular disease is highly prevalent, we reviewed the use of cardiovascular drugs and  
19  
20 created a variable for each of the following 11 classes of drugs (oral anti-coagulants, beta-  
21  
22 blockers, angiotensin converting enzyme / angiotensin II receptor blockers, anti-platelets,  
23  
24 calcium channel blockers, anti-arrhythmics, digitalis glycosides, nitrates, diuretics, [alpha-](#)  
25  
26 blockers, statins) to account for the complexity of therapeutic regimen at the patient level.  
27  
28  
29  
30  
31  
32  
33

34 To take advantage of the fact that the RER database includes multiple years of data, we created  
35  
36 history variables using the utilization for each year of data available. Since we were working  
37  
38 with the 2011 data to predict hospitalization or death in 2012, we created history variables based  
39  
40 on 2004-2010 data. This set included 83 of the diagnostic category/stage variables as well as 11  
41  
42 variables based on pharmacy utilization such as exposure to polypharmacy and use of  
43  
44 cardiovascular drugs. If the individual had a history of a disease in any of the years from 2004 to  
45  
46 2010 they were flagged as having a history of that disease and this was used as a potential  
47  
48 predictor variable.  
49  
50  
51  
52  
53  
54

## 55 Modeling

1  
2  
3 Logistic regression models were used to estimate predicted probabilities for the occurrence of an  
4  
5 inpatient hospital stay for the selected conditions or death for individual patients. Risk of  
6  
7 hospitalization or death, and the variables that relate to those risks are highly dependent on age  
8  
9 and gender. Regression models were fit in each of 14 gender and age strata using SAS Version  
10  
11 9.2 (SAS Institute, Cary NC). A stepwise process with relaxed covariate entry and retention  
12  
13 criteria (inclusion p-value  $\leq 0.8$ , retention  $\leq 0.5$ ) was used. At each step in this process, an  
14  
15 attempt is made to remove any unimportant variables from the model before adding a potentially  
16  
17 important variable. Each addition or deletion of a variable to or from a potential model is a  
18  
19 separate step and, at each step, a new model is fitted. This process results in a reduced, but robust  
20  
21 set of independent variables that predict outcome or that might have importance as adjustment  
22  
23 terms for the model in each age/gender stratum.  
24  
25  
26  
27  
28  
29  
30  
31  
32  
33

### 34 Evaluation of the Models

35  
36 The predictive accuracy of the modelling was evaluated using C-statistics (the area under the  
37  
38 receiver operating characteristics curve), along with three measures traditionally used with  
39  
40 clinical screening tools: sensitivity, specificity and positive predictive value.  
41  
42  
43

44 C-statistics were used to evaluate the models in two ways. The first evaluation consisted of  
45  
46 fitting the model developed using utilization and demographic data from 2011, along with  
47  
48 historical variables based on 2004-2010 data, and outcomes (hospitalization or death) from 2012  
49  
50 and then computing a C-statistic to evaluate how the models performed at predicting those  
51  
52 outcomes on which the models were conditioned. However, this evaluation is not consistent with  
53  
54 evaluating how the data are used in practice. In practice, we have current predictor information,  
55  
56  
57  
58  
59  
60



1  
2  
3 but the outcomes have not been realized. To better estimate how the models are likely to perform  
4  
5 in this setting, we fit models to outcomes data up to a year prior to the most current available  
6  
7 (e.g., 2011 outcomes modelled with predictors from 2010, along with historical variables based  
8  
9 on 2004-2009 data). We then computed a C-statistic for projections made on the risk of  
10  
11 hospitalization or death outcomes (in 2012) using the next year's predictor information (in 2011).  
12  
13 This way, the models are forced to make projections into the future, but we have the actual  
14  
15 observed outcomes data to evaluate the modelling process as it would be used in practice. The  
16  
17 resulting C-statistics obtained from these two model runs were compared.  
18  
19  
20  
21  
22

23 In order to evaluate the performance of the model across different risk thresholds we classified  
24  
25 predicted risk scores. "Very high risk" was defined as patients with a predicted risk of  
26  
27 hospitalization or death in the following year of  $\geq 25\%$  while "high risk" was defined as patients  
28  
29 with a predicted risk of hospitalization of 15-24%. These risk thresholds were selected after  
30  
31 consultation with physicians practicing in the medical homes to yield a total of about 10% of the  
32  
33 1,500 patients enrolled with a typical primary care physician.  
34  
35  
36  
37

### 38 **Results**

39  
40  
41 Among the 3,726,380 adult residents of Emilia Romagna at the end of 2011, 449,163 (12.1%)  
42  
43 were hospitalized in 2012; 4.2% were hospitalized for the selected conditions defined earlier or  
44  
45 died in 2012 (3.6% hospitalized, 1.3% died).  
46  
47  
48

49 Table 1 shows the distribution of the demographics (age and gender), number of chronic  
50  
51 conditions, body systems impacted by the selected chronic conditions, polypharmacy and  
52  
53 inappropriate prescribing among the eligible RER residents, as of December 31, 2011. ~~The~~  
54  
55  
56  
57

table 1 also compares these characteristics of the total adult population of the region to the subgroups of the population classified in the “very high risk” and “high risk” categories. Based on the model results, 114,255 individuals were identified as having a predicted risk of hospitalization or death in 2012 of  $\geq 25\%$  and classified as “very high risk.” An additional 134,610 individuals had a predicted risk of hospitalization or death in 2012 of 15-24% and were classified as “high risk.”

**Table 1. Demographic and clinical characteristics of the Regione Emilia-Romagna population, overall and by risk category**

|                                         | Total Population* |       | Very High Risk** |       | High Risk** |       |
|-----------------------------------------|-------------------|-------|------------------|-------|-------------|-------|
|                                         | 3,726,380         |       | 114,255          |       | 134,610     |       |
| <b>Gender</b>                           | N.                | %     | N.               | %     | N.          | %     |
| Male                                    | 1,788,048         | 48.0% | 54,357           | 47.6% | 61,803      | 45.9% |
| Female                                  | 1,938,332         | 52.0% | 59,898           | 52.4% | 72,807      | 54.1% |
| <b>Age groups</b>                       |                   |       |                  |       |             |       |
| 18-24                                   | 258,338           | 6.9%  | 76               | 0.1%  | 105         | 0.1%  |
| 25-34                                   | 499,786           | 13.4% | 302              | 0.3%  | 391         | 0.3%  |
| 35-44                                   | 732,626           | 19.7% | 1,137            | 1.0%  | 1,198       | 0.9%  |
| 45-54                                   | 676,047           | 18.1% | 2,612            | 2.3%  | 2,485       | 1.8%  |
| 55-64                                   | 550,689           | 14.8% | 5,391            | 4.7%  | 5,287       | 3.9%  |
| 65-74                                   | 482,346           | 12.9% | 13,154           | 11.5% | 14,471      | 10.8% |
| 74-85                                   | 364,369           | 9.8%  | 33,430           | 29.3% | 44,857      | 33.3% |
| 85+                                     | 162,179           | 4.4%  | 58,153           | 50.9% | 65,816      | 48.9% |
| <b>Number of Chronic Conditions</b>     |                   |       |                  |       |             |       |
| 0-1                                     | 2,775,888         | 74.5% | 8,176            | 7.2%  | 24,618      | 18.3% |
| 2 or more                               | 950,492           | 25.5% | 106,079          | 92.8% | 109,992     | 81.7% |
| 5 or more                               | 99,337            | 2.7%  | 45,445           | 39.8% | 20,576      | 15.3% |
| <b>Selected Conditions/Body Systems</b> |                   |       |                  |       |             |       |
| Cancer                                  | 99,328            | 2.7%  | 23,872           | 20.9% | 14,305      | 10.6% |
| Cardiovascular                          | 967,796           | 26.0% | 96,157           | 84.2% | 103,749     | 77.1% |
| Male Genitourinary <sup>#</sup>         | 130,609           | 7.3%  | 14,616           | 26.9% | 16,776      | 27.1% |
| Ear, Nose, Throat                       | 5,364             | 0.1%  | 240              | 0.2%  | 242         | 0.2%  |
| Endocrine                               | 429,528           | 11.5% | 40,653           | 35.6% | 37,471      | 27.8% |

|                                                                                       |                |              |               |              |               |              |
|---------------------------------------------------------------------------------------|----------------|--------------|---------------|--------------|---------------|--------------|
| Eye                                                                                   | 114,117        | 3.1%         | 9,558         | 8.4%         | 13,478        | 10.0%        |
| Gastrointestinal                                                                      | 580,946        | 15.6%        | 74,718        | 65.4%        | 66,305        | 49.3%        |
| Gynecologic <sup>##</sup>                                                             | 21,806         | 1.1%         | 333           | 0.6%         | 405           | 0.6%         |
| Hematologic                                                                           | 45,022         | 1.2%         | 15,353        | 13.4%        | 6,591         | 4.9%         |
| Hepatobiliary                                                                         | 24,785         | 0.7%         | 6,477         | 5.7%         | 3,306         | 2.5%         |
| Immunologic                                                                           | 3,281          | 0.1%         | 464           | 0.4%         | 273           | 0.2%         |
| Infectious Disease                                                                    | 4,723          | 0.1%         | 2,207         | 1.9%         | 727           | 0.5%         |
| Musculoskeletal                                                                       | 419,184        | 11.2%        | 43,436        | 38.0%        | 41,000        | 30.5%        |
| Neurologic                                                                            | 173,751        | 4.7%         | 34,494        | 30.2%        | 24,838        | 18.5%        |
| Psychological                                                                         | 291,308        | 7.8%         | 43,387        | 38.0%        | 33,715        | 25.0%        |
| Respiratory                                                                           | 176,830        | 4.7%         | 39,082        | 34.2%        | 21,763        | 16.2%        |
| Skin                                                                                  | 28,339         | 0.8%         | 7,645         | 6.7%         | 3,008         | 2.2%         |
| Urogenital                                                                            | 37,728         | 1.0%         | 16,501        | 14.4%        | 5,740         | 4.3%         |
| <b>Polypharmacy<sup>^</sup></b>                                                       | <b>609,278</b> | <b>16.4%</b> | <b>92,153</b> | <b>80.7%</b> | <b>92,156</b> | <b>68.5%</b> |
| <b>Any potentially inappropriate medications (age 65 years or older)<sup>^^</sup></b> | <b>257,033</b> | <b>25.5%</b> | <b>51,055</b> | <b>48.7%</b> | <b>49,003</b> | <b>39.2%</b> |

\* Adults (age 18 or older) and alive at 31 December 2011.

\*\* "Very high risk" was defined as patients with a predicted risk of hospitalization or death in the following year of  $\geq 25\%$  while "high risk" was defined as patients with a predicted risk of hospitalization of 15-24%.

# Men only.

## Women only.

<sup>^</sup> Polypharmacy is defined as the simultaneous use of five or more active ingredients for at least 15 consecutive days.

<sup>^^</sup> The list of potentially inappropriate medications can be found in: Maio V, Del Canale S, Abouzaid S. Using Explicit Criteria to Evaluate the Quality of Prescribing in Elderly Italian Outpatients: A Cohort Study. *Journal of Clinical Pharmacy and Therapeutics* 2010;35:219-229.

There was little difference across the risk categories by gender. Age distributions for the "very high risk" and "high risk" groups were shifted more towards the older age groups than those in the overall study population. Residents age 85 or older represented about 4.5% of the RER population, but about 50% of the "very high" and "high" predicted risk groups. More than 75% of the residents over age 85 were classified as "very high" or "high" risk. However, age alone was not sufficient to ~~their~~ predict their risk. For example, residents between 75 and 84 years of

1  
2  
3 age made up 23% of the “very high” risk group and 41% of the “high” risk group, but over 85%  
4  
5 of the residents in this age category had neither “very high” nor “high” predicted risk.  
6  
7

8  
9 Across age and gender strata, demographics and health care utilization experience in 2011 were  
10  
11 the most commonly used independent variables for predicting hospitalization or death in 2012.  
12  
13 Selected history variables flagging chronic problems such as cardiovascular disease, diabetes  
14  
15 mellitus and chronic renal failure and a history of prescriptions for cardiovascular medications  
16  
17 and polypharmacy were also significant predictors.  
18  
19

20  
21 The residents in the two higher risk groups were more likely than others to have multiple chronic  
22  
23 diseases and to experience polypharmacy and inappropriate medication use. The residents  
24  
25 identified as “very high risk” or “high risk” by the model also showed a number of striking  
26  
27 differences from others in terms of the occurrence of some of the most prevalent health  
28  
29 conditions by type and body system. Although cardiovascular conditions were not uncommon in  
30  
31 the total adult population (26.0%), they were far more common among those classified as “very  
32  
33 high risk” and “high risk” (84.2% and 77.1%, respectively). Similarly, gastrointestinal conditions  
34  
35 affected 15.6% of the total population, but were diagnosed in 65.4% of the “very high risk” and  
36  
37 49.3% of the “high risk” patients. Cancer occurred in 2.7% of the total population, but 20.9% of  
38  
39 the “very high risk” and 10.6% of the “high risk” patients had a cancer diagnosis. Mental health  
40  
41 problems were identified in 7.8% of the adult population, but in 34.2% of the “very high risk”  
42  
43 and 25.0% of the “high risk” patients.  
44  
45  
46  
47  
48  
49

50  
51 The C-statistic for the model of 2012 outcomes developed using 2011 predictors and the  
52  
53 C-statistic based on the parameters from the model of 2011 outcomes regressed on 2010  
54  
55 predictors applied to the 2011 predictors and 2012 outcomes were very similar (0.856 and 0.853,  
56  
57

respectively). These results suggest that the relationship between predictors and risk of hospitalization changed little in one year and that model parameters developed in a prior year can be used reliably with the most current year's data to predict unknown outcomes in the next year with only a minimal loss in performance in this population.

Table 2 shows the sensitivity, specificity, positive predictive value and number of true positives for the model at the two selected cut-off points. The sensitivity (percentage of patients actually hospitalized who had been identified by the model as having a predicted risk higher than the cut-off point) was 29.8% for those with the "very high" risk scores. This percentage represents 46,950 of the 157,550 residents of the region who were hospitalized for a selected condition or died in 2012. If we modify the risk score threshold to include individuals with a predicted risk of hospitalization for selected conditions or death of  $\geq 15\%$  (i.e., both the "very high risk" and the "high risk" patients) the sensitivity is .471. The true negative rate (specificity) is very high for both risk thresholds (.981 and .951, respectively).

| Measure                                                                                                                                                                                                                                                                                                                                                    | Cut-off points for comparison |                                   |
|------------------------------------------------------------------------------------------------------------------------------------------------------------------------------------------------------------------------------------------------------------------------------------------------------------------------------------------------------------|-------------------------------|-----------------------------------|
|                                                                                                                                                                                                                                                                                                                                                            | "Very high risk"*             | "Very high risk"* + "High risk"** |
| <b>Sensitivity</b> <sup>#</sup>                                                                                                                                                                                                                                                                                                                            | 0.298                         | 0.471                             |
| <b>Specificity</b> <sup>##</sup>                                                                                                                                                                                                                                                                                                                           | 0.981                         | 0.951                             |
| <b>Positive Predictive Value</b> <sup>^</sup>                                                                                                                                                                                                                                                                                                              | 0.411                         | 0.298                             |
| <b>True positives</b> <sup>^^</sup>                                                                                                                                                                                                                                                                                                                        | 46,950                        | 74,196                            |
| * "Very high risk" is defined as patients with a predicted risk of hospitalization of $\geq 25\%$ .<br>** "Very high risk" + "High risk", is defined as patients with a predicted risk of hospitalization of $\geq 15\%$ .<br># Sensitivity is defined as the proportion of those hospitalized who were predicted to be hospitalized (true positive rate). |                               |                                   |

1  
2  
3  
4  
5  
6  
7  
8  
9

|                                                                                                                                                                                                                                                                                                                                                                                                                                        |
|----------------------------------------------------------------------------------------------------------------------------------------------------------------------------------------------------------------------------------------------------------------------------------------------------------------------------------------------------------------------------------------------------------------------------------------|
| <p>## Specificity is the proportion of those not hospitalized who were not predicted to be hospitalized (true negative rate).</p> <p>^ Positive Predictive Value is the proportion of those predicted to be hospitalized who were actually hospitalized.</p> <p>^^ True positives are the number of residents who were predicted to be at risk for hospitalization at the predicted risk threshold and were actually hospitalized.</p> |
|----------------------------------------------------------------------------------------------------------------------------------------------------------------------------------------------------------------------------------------------------------------------------------------------------------------------------------------------------------------------------------------------------------------------------------------|

10  
11  
12  
13  
14  
15  
16  
17  
18  
19  
20  
21  
22  
23  
24  
25  
26  
27  
28  
29  
30  
31  
32  
33  
34

The model appears to be well calibrated across levels of risk. ~~The~~ Figure 1 depicts the RER population divided into groups by deciles of predicted risk of hospitalization or death from the models. The observed prevalence of hospitalization or death is compared to the average predicted risk among individuals in each of the ten predicted risk groups. For example, the overall rate of hospitalization for the selected conditions or death in 2012 was 4.2%. For those patients in the highest predicted risk decile group, the average predicted risk was 23.9% and the actual prevalence of hospitalization or death was 24.2%. (Regression coefficients and significance levels of independent variables for models for each of 14 age and gender strata are displayed in Appendix 2.)

35  
36  
37  
38  
39  
40

[Insert Figure 1 about here]

## 41 42 **Discussion**

43  
44  
45  
46  
47  
48  
49  
50  
51  
52  
53  
54  
55  
56  
57  
58  
59  
60

We have developed a population-based model that identifies the risk of hospitalization for all adult RER residents and does so with a level of performance ( $c=0.85$ ) as high as, or higher than, similar models. In addition, we believe that the definition of the dependent variable chosen for our models increases the probability that they are identifying patients who risk can potentially be improved by appropriate care. A systematic review by Kansagara<sup>13</sup> of models designed to predict readmissions, showed C-statistic results in the range of 0.55 to 0.83. Recent work by

1  
2  
3 Billings et al<sup>14</sup> to develop models predictive of emergent admissions in the UK had results  
4 ranging from 0.73 to 0.78. Li Wang, et al. (2013),<sup>15</sup> using information available through the  
5  
6 [United States Department of Veterans Affairs US Veteran's Administration](#) that also included  
7 lab data, demonstrated Ce-statistics of 0.81 and 0.79, respectively, for their models of 90-day or  
8  
9 12-month hospitalization or death outcomes. At a predicted risk of  $\geq 25\%$  our model had a  
10  
11 Positive Predictive Value (PPV) of .411. Billings et al<sup>14</sup> reported a PPV of .417 at a risk  
12  
13 threshold of 30. There is a trade-off in using our model, or any predictive model, between the  
14  
15 threshold for follow-up and predictive accuracy. A lower risk threshold would identify more  
16  
17 patients but with a lower prevalence of hospitalization or death.  
18  
19

20  
21 Although previous studies have developed models predictive of hospital care, these models fall  
22  
23 short of the needs of the Patient Centered Medical Homes being implemented in RER. Typically,  
24  
25 these models have focused on specific age groups,<sup>16</sup> conditions, or types of admissions, such as  
26  
27 emergent<sup>14</sup> or unplanned admissions or rehospitalizations, or health insurance plans in the United  
28  
29 States, including private insurance plans, Medicare and Medicaid plans.<sup>17,18</sup> The models we have  
30  
31 developed are applied to the entire adult population of RER. They use existing administrative  
32  
33 data, which makes them cost effective to apply.  
34  
35  
36  
37  
38  
39  
40  
41  
42

43 Patient Centered Medical Homes, including those instituted in RER, are responsible for  
44  
45 addressing the needs of their population and making the best use of their finite resources to  
46  
47 accomplish this. Preventing unnecessary admissions could improve both the quality of care and  
48  
49 health status of the enrolled population, and result in a substantial savings. To accomplish this,  
50  
51 predictive models and risk stratification tools such as those developed for this project are needed  
52  
53  
54  
55  
56  
57  
58  
59  
60

1  
2  
3 to identify patients at risk of preventable admissions and provide information that can be used by  
4  
5 the medical homes to help manage care.  
6  
7

8  
9 There are some limitations to the model. The model is developed from administrative data.

10  
11 Administrative data are collected for reimbursement and tracking utilization and not for medical

12  
13 research. They lack the clinical specificity that would [be](#) desirable in assessing an individual's

14  
15 medical problems. [Patients with medical problems who have not used the services included in](#)

16  
17 [the database cannot be identified.](#) While the hospital discharge abstract data do include

18  
19 diagnostic information coded using ICD-9-CM, no similar data are available for outpatient

20  
21 encounters in the RER database. The mortality data available for this project did not include

22  
23 information about cause of death. Therefore, some proportion of patients whose death was not

24  
25 predictable were included, limiting model performance. In addition, our models use prior

26  
27 utilization among the predictor variables. With the administrative data we cannot distinguish

28  
29 between appropriate and inappropriate treatment which may bias our results.  
30  
31  
32  
33  
34  
35

36 Despite the limitations of administrative data, they have many advantages for this project: they

37  
38 are readily available, relatively inexpensive to analyze and cover large populations over many

39  
40 years. They are ideal for uncovering patterns of care. If information from the medical records is

41  
42 needed, the results of these analyses can then be supplemented by focused clinical reviews at the

43  
44 local level. Also, The RER has a system in place to monitor the quality of diagnosis and

45  
46 procedure coding in their hospital discharge abstract data. Controls at both the hospital and

47  
48 regional level assess the validity of coding and the consistency of codes assigned such as

49  
50 congruity between sex, age and diagnosis and between diagnosis and procedure. The existence

51  
52 of the RER administrative database made it feasible to develop the models described in this  
53  
54  
55  
56  
57  
58  
59  
60



1  
2  
3 article at relatively low cost and to update the models over time without additional data  
4  
5 collection that others have found necessary.<sup>14</sup>  
6  
7

8  
9 Currently, these risk scores are being integrated with other information in profiles of high-risk  
10  
11 patients furnished to providers in 12 newly formed medical homes, including 83 primary care  
12  
13 physicians serving a total of about 100,000 patients, in the Parma Local Health Authority located  
14  
15 in RER. Along with the risk scores, this information includes data about previous  
16  
17 hospitalizations, use of referrals, medications, long-term care and home care services, and a  
18  
19 number of process-like quality indicators for diabetic and cardiovascular patients, and for  
20  
21 appropriate medication use in older patients.  
22  
23

24  
25  
26 We believe that the Italian health care system offers a number of advantages in the goal of  
27  
28 reducing potentially avoidable hospitalization. Every Italian must enroll with a primary care  
29  
30 physician. The population is quite stable with modest levels of change of residence or change of  
31  
32 primary care physician. Every Italian is entitled to health care with little or no cost at the point  
33  
34 of service. There is no problem with loss of, or change in, insurance coverage. Primary care  
35  
36 physicians are primarily paid on a per capita basis. But the Emilia-Romagna region has the  
37  
38 ability to negotiate incentive payments designed to address and monitor improvements in  
39  
40 medical management such as that addressed in our study.  
41  
42  
43  
44

45  
46 Of course, model results need to lead to ~~an~~ effective interventions to have a positive impact on  
47  
48 patient care. To this end, we are working with the physicians, nurses, ~~and~~ and other health care  
49  
50 professionals as well as the administration of the newly formed Medical Homes in Parma to  
51  
52 assist them in understanding how to use the results of these models and in developing potentially  
53  
54 effective interventions. The individual profiles of high risk patients provided to the health care  
55  
56  
57  
58  
59  
60

1  
2  
3 team in the Medical Homes allow them to trigger specific actions such as inviting patients to  
4 enroll in disease management programs for chronic problems such as heart failure, chronic  
5 obstructive pulmonary disease, or diabetes mellitus, activating home health assistance, initiating  
6 a medication review, or recommending that the patient come in for an office visit. An evaluation  
7 of the use and usefulness of the profiles and intervention is under way.  
8  
9  
10  
11  
12  
13

14  
15  
16 In summary, these models provide a means of identifying patients at high risk for hospitalization.  
17 The risk predictions, in conjunction with the risk profile, show promise as a useful organizational  
18 tool for the regional Patient Centered Medical Homes to develop and implement proactive case  
19 management and disease management programs. The RER is reviewing the results of the Parma  
20 Local Health Authority pilot project of the profiles. Once their usefulness has been further  
21 evaluated, their use will be expanded to other Medical Homes in development in the other Local  
22 Health Authorities in the Emilia-Romagna region. If similar data are available, these models can  
23 be applied in other Italian regions and other countries investing in organization similar to the  
24 Patient Centered Medical Home.  
25  
26  
27  
28  
29  
30  
31  
32  
33  
34  
35  
36  
37  
38  
39  
40  
41  
42  
43  
44  
45  
46  
47  
48  
49  
50  
51  
52  
53  
54  
55  
56  
57  
58  
59  
60

**Figure 1 Legend:**

**Figure 1. Model calibration: Predicted risk and observed prevalence of hospitalization or death in 2012 by predicted risk decile groups.**

**Contributorship statement:** DZL, RG, VM, and JSG were responsible for the conceptualization of this project. MR, JM, and ML were responsible for creation of the datasets used in this project. DZL, VM, MR, and JSG were responsible for the definition of analytical variables. SWK, MR, ML and JM were responsible for modeling and statistical analysis. DZL managed the research team. RG and JSG advised on the analyses and results. All authors contributed to the preparation of the manuscript.

**Competing interests:** All authors have completed the Unified Competing Interest form and declare grants from the Regione Emilia-Romagna (Louis, Robeson, McAna, Maio, Keith, Liu, Gonnella) during the conduct of the study. Louis and Gonnella declare personal fees from Truven Health Analytics, The National School of Public Health, Portugal, INSIEL Mercato.

**Funding:** This research was funded by the Agenzia Sanitaria e Sociale of the Emilia-Romagna Region, Italy. The resulting models are being used by the Local Health Authority of Parma, Italy and the Patient Centered Medical Homes located in the Parma Local Health Authority.

**Data Sharing:** No additional data available.

---

1 Saltman RB, Rico A, Boerma W, eds. Primary care in the driver's seat? Organizational reform in European primary care. New York, New York: World Health Organization European Observatory on Health Systems and Policies Series 2006.

2 Smith J, Goodwin N. Towards managed primary care: The role and experience of primary care organizations. Burlington, VT: Ashgate Publishing Company 2006.

1  
2  
3  
4  
5 3 Defining the PCMH. Agency for Healthcare Research and Quality Web site.

6  
7 [http://www.pcmh.ahrq.gov/portal/server.pt/community/pcmh\\_\\_home/1483/pcmh\\_defining\\_the\\_pcmh\\_v2](http://www.pcmh.ahrq.gov/portal/server.pt/community/pcmh__home/1483/pcmh_defining_the_pcmh_v2) (accessed June 30, 2013).

10  
11  
12 4 Lo Scalzo A, Donatini A, Orzella I, et al. Italy: Health system review. *Health Syst Transit*.  
13 2009;**11**(6):1-216.

14  
15  
16  
17  
18 ~~5 Knutson D, Bella M, Llanos K. Predictive Modeling: A Guide for State Medicaid Purchasers.~~  
19  
20  
21 ~~Center for Health Care Strategies, Inc. 2009.~~

22  
23  
24 6 The Emilia-Romagna Regional Health Service and the new welfare system: Facilities,  
25 expenditure, and activities as of 31.12.2010. Programs, agreements and organisational models.  
26 Regione Emilia-Romagna Assessorato Politiche per la Salute. Bologna, Italy 2012.

27  
28  
29  
30  
31 7 Gonnella JS, Hornbrook MC, Louis DZ. Staging of Disease: A Case-Mix Measurement. *JAMA*  
32 1984;**251**:637–44.

33  
34  
35  
36  
37 8 Gonnella JS, Louis DZ, Gozum ME, et al, eds. Clinical Criteria for Disease Staging. 6th  
38 edition. Ann Arbor, MI: Truven Health Analytics 2012.

39  
40  
41  
42 9 Louis DZ, F Taroni, R Melotti, et al. Increasing appropriateness of hospital admissions in the  
43 Emilia-Romagna region of Italy. *J Health Serv Res Policy* 2008;**13**(4):202-8.

44  
45  
46  
47  
48 10 Slabaugh L, Maio V, Templin M, et al. Prevalence and risk of polypharmacy amongst elderly  
49 primary care patients in Regione Emilia-Romagna, Italy. *Drug Aging* 2010;**27**:1019-28.

- 1  
2  
3  
4  
5 11 Gagne JJ, Maio V, Rabinowitz C. Prevalence and Predictors of Potential Drug-Drug  
6  
7 Interactions among Ambulatory Patients in Regione Emilia-Romagna, Italy. *J Clin Pharm Ther*  
8  
9 2008;**33**:141-51.  
10  
11  
12 12 Maio V, Del Canale S, Abouzaid S. Using Explicit Criteria to Evaluate the Quality of  
13  
14 Prescribing in Elderly Italian Outpatients: A Cohort Study. *J Clin Pharm Ther* 2010;**35**:219-29.  
15  
16  
17  
18 13 Kansagara D, Englander H, Salanitro A, et al. Risk prediction models for hospital  
19  
20 readmission: A systematic review. Washington, DC: Department of Veterans Affairs US 2011.  
21  
22  
23  
24 14 Billings J, Georghiou T, Blunt I, et al. Choosing a model to predict hospital admission: An  
25  
26 observational study of new variants of predictive models for case finding. *BMJ Open*  
27  
28 2013;**3**(8):e003352. doi: 10.1136/bmjopen-2013-003352 [published Online First: 26 August  
29  
30 2013].  
31  
32  
33  
34 15 Wang L, Porter B, Maynard C, et al. Predicting risk of hospitalization or death among patients  
35  
36 receiving primary care in the Veterans Health Administration. *Med Care* 2013;**51**(4):368-73.  
37  
38  
39  
40 16 Inouye SK, Zhang Y, Jones RN, et al. Risk factors for hospitalization among community-  
41  
42 dwelling primary care older patients: development and validation of a predictive model. *Med*  
43  
44 *Care* 2008;**46**(7):726-31.  
45  
46  
47  
48 17 Lemke KW, Weiner JP, Clark JM. Development and validation of a model for predicting  
49  
50 inpatient hospitalization. *Med Care* 2012;**50**(2):131-9.  
51  
52  
53  
54 18 McAna JF, Crawford AG, Novinger BW, et al. A predictive model of hospitalization risk  
55  
56 among disabled Medicaid enrollees. *Am J Manag Care* 2013;**19**(5):166-74.  
57  
58  
59  
60

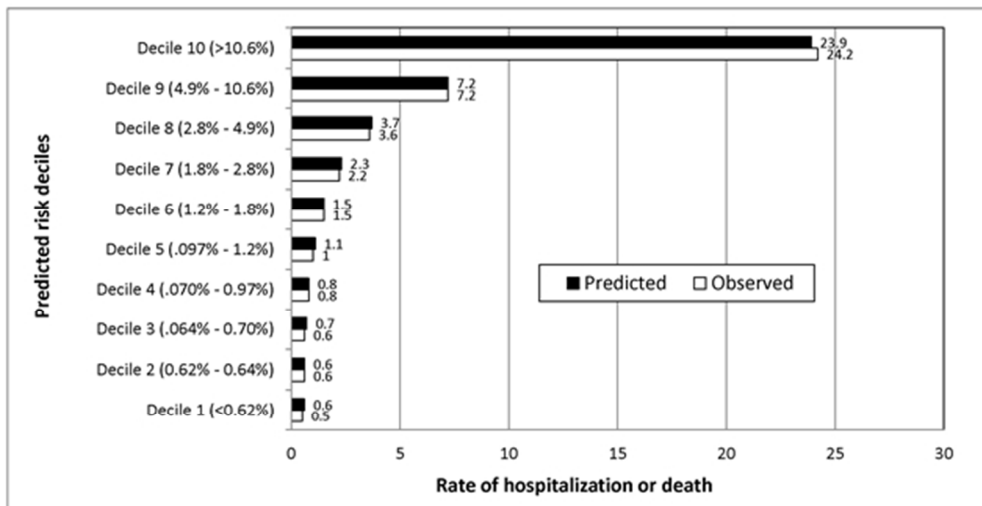

54x27mm (300 x 300 DPI)

er review only

1  
2  
3  
4  
5  
6  
7  
8  
9  
10  
11  
12  
13  
14  
15  
16  
17  
18  
19  
20  
21  
22  
23  
24  
25  
26  
27  
28  
29  
30  
31  
32  
33  
34  
35  
36  
37  
38  
39  
40  
41  
42  
43  
44  
45  
46  
47  
48  
49  
50  
51  
52  
53  
54  
55  
56  
57  
58  
59  
60

Appendix 1: Mapping to Body System or Etiology Groups

| Body System or Etiology Group | Hospital Discharge data                                                                                                                                                                                                                                                                                                                                                                                                                                                                                                                                                                                                                                                                                                                                                                                                                                                                                                                                                                                                                                                                                                                                                                                                                                                                                                                       | Outpatient pharmacy data            | Home health care                                                                                                                                           | Specialty visits                                                                                                          |
|-------------------------------|-----------------------------------------------------------------------------------------------------------------------------------------------------------------------------------------------------------------------------------------------------------------------------------------------------------------------------------------------------------------------------------------------------------------------------------------------------------------------------------------------------------------------------------------------------------------------------------------------------------------------------------------------------------------------------------------------------------------------------------------------------------------------------------------------------------------------------------------------------------------------------------------------------------------------------------------------------------------------------------------------------------------------------------------------------------------------------------------------------------------------------------------------------------------------------------------------------------------------------------------------------------------------------------------------------------------------------------------------|-------------------------------------|------------------------------------------------------------------------------------------------------------------------------------------------------------|---------------------------------------------------------------------------------------------------------------------------|
| <b>Cancer</b>                 | Neoplasm, Malignant:<br>Cardiovascular, Hypopharynx, Oral Cavity, Oropharynx, Salivary Glands and Mandible, Other Endocrine System, Larynx, Glottis, Larynx, Subglottic, Larynx, Supraglottic, Nasopharyngeal, Sinuses, Ocular Melanoma, Other Eye and Periocular, Colon and Rectum, Esophagus, Small Bowel, Stomach, Other Gastrointestinal System, Bladder, Urinary, Kidneys, Other Genitourinary System, Breast (Female), Cervix Uteri, Endometrium, Ovaries, Vagina, Vulva, Other Female Genitalia, Hodgkin's Lymphoma, Multiple Myeloma, Mastocytosis, Pancreas, Other Hepatobiliary Tract, Breast (Male), Penile, Prostate, Testicular, Primary Bone, Waldenstrom's Macroglobulinemia, Nonspecific Sites, Unspecified Primary Site, Lungs, Bronchi, or Mediastinum, Hodgkin's Disease Lymphocytic Depletion, Hodgkin's Disease Lymphocytic Predominance, Hodgkin's Disease Mixed Cellularity, Hodgkin's Disease Nodular Sclerosis, Lymphatic and Hematopoietic (Other Types), Lymphoma, Cutaneous T Cell (Mycosis Fungoides), Lymphoma (Diffuse Mixed Small and Large Cell), Lymphoma (Diffuse Large Cell), Lymphoma (Follicular Predominantly Large Cell), Lymphoma (Histiocytic Cell), Lymphoma (Lymphoblastic), Other Respiratory System, Carcinoma (Basal Cell stage 2/3), Carcinoma (Squamous Cell), Melanoma, Other Skin and Soft | Antineoplastics<br>5HT3 Antagonists | 2005-2009: Visits prescribed due to the presence of cancer. Beginning in 2010, the following ICD-9-CM codes were in the record: 140-208, 235-239, V10, V16 | Visits prescribed for radiation therapy, or for Injection or infusion of chemotherapeutic Substances for cancer treatment |

A-1

| Body System or Etiology Group | Hospital Discharge data                                                                                                                                                                                                                                                                                                                                                                                                                                                                                                                                                                                                                                                                                                                                                                                                                                                          | Outpatient pharmacy data                                                                                                                                                                        | Home health care                                                                                                                                                                                                                                                                             | Specialty visits |
|-------------------------------|----------------------------------------------------------------------------------------------------------------------------------------------------------------------------------------------------------------------------------------------------------------------------------------------------------------------------------------------------------------------------------------------------------------------------------------------------------------------------------------------------------------------------------------------------------------------------------------------------------------------------------------------------------------------------------------------------------------------------------------------------------------------------------------------------------------------------------------------------------------------------------|-------------------------------------------------------------------------------------------------------------------------------------------------------------------------------------------------|----------------------------------------------------------------------------------------------------------------------------------------------------------------------------------------------------------------------------------------------------------------------------------------------|------------------|
|                               | Tissue<br>Neoplasm:<br>Pheochromocytoma, Eyelid, Central Nervous System,<br>Lymphatic or Hematopoietic<br>Leukemia:<br>Acute Lymphocytic, Acute Nonlymphocytic, Chronic<br>Lymphocytic, Chronic Myelogenous, Other Types<br>Encounter for: Chemotherapy, Radiation Therapy<br>ICD-9-CM Procedure codes: 99.25, 99.28, 00.10,00.15,92.2x                                                                                                                                                                                                                                                                                                                                                                                                                                                                                                                                          |                                                                                                                                                                                                 |                                                                                                                                                                                                                                                                                              |                  |
| <b>Cardiovascular</b>         | Aneurysm: Abdominal, Thoracic<br>Anomaly: Patent Ductus Arteriosus, Atrial Septal Defect,<br>Atrioventricular Defects, Coarctation of the Aorta, Other<br>Congenital Heart Disease, Pulmonary Valve Stenosis,<br>Tetralogy of Fallot (stage 3), Transposition of the Great<br>Arteries, Ventricular Septal Defects, Other Circulatory<br>System<br>Aortic: Regurgitation, Stenosis<br>Mitral: Regurgitation, Stenosis<br>Neoplasm: Benign of the Cardiovascular System<br>Arrhythmias, Cardiomyopathies, Conduction Disorders,<br>Congestive Heart Failure, Coronary Artery Disease Prior<br>Coronary Revascularization, Coronary Artery Disease w/o<br>Prior, Coronary Revascularization, Essential Hypertension,<br>Infective, Endocarditis, Pericarditis: Chronic (stage 2/3),<br>Viral or Traumatic (stage 2/3)<br>Periarteritis Nodosa, Raynaud's Disease, Thromboangiitis, | Oral anti-coagulants<br>beta-blockers<br>ACE/ARB<br>anti-platelets<br>calcium channel blockers<br>anti-arrhythmics<br>digitalis glycosides<br>nitrates<br>diuretics<br>alfa-blockers<br>statins | 2005-2009: Visits<br>prescribed due to<br>the presence of<br>Congestive Heart<br>Failure or not-well<br>defined<br>cardiopathy, and<br>other diseases of<br>cardiovascular<br>system.<br>Beginning in 2010,<br>the following ICD-<br>9-CM-CM codes<br>were in the record:<br>390-454,456-459 |                  |

A-2



1  
2  
3  
4  
5  
6  
7  
8  
9  
10  
11  
12  
13  
14  
15  
16  
17  
18  
19  
20  
21  
22  
23  
24  
25  
26  
27  
28  
29  
30  
31  
32  
33  
34  
35  
36  
37  
38  
39  
40  
41  
42  
43  
44  
45  
46  
47  
48  
49

| Body System or Etiology Group | Hospital Discharge data                                                                                                                                                                                                                                                                                                                                                                                                                                                                                                                                                                                                                                           | Outpatient pharmacy data                                                                            | Home health care                                                                                                                                     | Specialty visits |
|-------------------------------|-------------------------------------------------------------------------------------------------------------------------------------------------------------------------------------------------------------------------------------------------------------------------------------------------------------------------------------------------------------------------------------------------------------------------------------------------------------------------------------------------------------------------------------------------------------------------------------------------------------------------------------------------------------------|-----------------------------------------------------------------------------------------------------|------------------------------------------------------------------------------------------------------------------------------------------------------|------------------|
|                               | Obliterans, Thrombophlebitis, Tibial, Iliac, Femoral, or Popliteal Artery Disease, Varicose Veins of Lower Extremities, Secondary Hypertension, Budd Chiari Syndrome, Rheumatic Fever (stage 2/3) Vasculitis<br>Other: Atherosclerosis, Cardiac Conditions, Cardiovascular Symptoms, Circulatory Disorders, Diseases of Arteries, Diseases of Veins, Disorders of Pulmonary Circulation, Lymphatic Disorders                                                                                                                                                                                                                                                      |                                                                                                     |                                                                                                                                                      |                  |
| <b>Endocrine</b>              | Adrenal Insufficiency, Cushing's Syndrome, Diabetes insipidus,<br>Diabetes Mellitus Type 1, Diabetes Mellitus Type 2 and Hyperglycemic States,Hyperthyroidism, Hypoglycemia, Hypothyroidism, Monotropic Hormone Deficiency, Primary Amyloidosis, Thyroiditis, Klinefelter's Syndrome, Turner's or Noonan's Syndrome, Obesity<br>Goiter: Nontoxic or Euthyroid (stage 2/3)<br>Neoplasm, Benign: Acromegaly, Adenoma, Parathyroid, Hyperparathyroidism, Primary Hyperaldosteronism, Other Endocrine System<br>Neoplasm, Malignant:Thyroid<br>Other: Endocrine Disorders, Electrolyte Disorders, Nutritional and Metabolic Disorders<br>Anomaly: Adrenal Hyperplasia | Insulins<br>biguanides<br>sulfonylureas<br>vasopressin<br>thyroid replacement<br>antithyroid agents | 2005-2009: Visits prescribed due to the presence of diabetes mellitus<br>Beginning in 2010, the following ICD-9-CM codes were in the record: 240-278 |                  |

| Body System or Etiology Group | Hospital Discharge data                                                                                                                                                                                                                                                                                                                                                                                                                                                                                                                                                                                                                                        | Outpatient pharmacy data                                                                                   | Home health care                                                                                    | Specialty visits |
|-------------------------------|----------------------------------------------------------------------------------------------------------------------------------------------------------------------------------------------------------------------------------------------------------------------------------------------------------------------------------------------------------------------------------------------------------------------------------------------------------------------------------------------------------------------------------------------------------------------------------------------------------------------------------------------------------------|------------------------------------------------------------------------------------------------------------|-----------------------------------------------------------------------------------------------------|------------------|
| <b>Ear, Nose, Throat</b>      | Diseases of Salivary Gland, Incl. Parotitis or Benign Tumors, Other Disorders of Oral Cavity (stage 2), Cholesteatoma, Meniere's Disease, Otitis Media, Sinusitis<br>Hearing Loss due to: Acoustic Trauma, Otosclerosis<br>Neoplasm, Benign: Larynx, Sinuses, Oral Cavity and Pharyngeal Structures<br>Pharyngitis: Non-Streptococcal (stage 2)                                                                                                                                                                                                                                                                                                                |                                                                                                            |                                                                                                     |                  |
| <b>Eye</b>                    | Cataract, Conjunctivitis: Bacterial, Contusion or Ruptured Globe, Dacryostenosis or Dacryocystitis, Detachment of the Retina, Ectropion or Entropion (Abnormal Lower Lid Position), Endophthalmitis, Foreign Body: Orbit, Fracture: Orbit, Blow-Out, Fungal Infection of the Eye, Glaucoma, Hypovitaminosis A, Laceration: Cornea, Macular Degeneration, Orbital Infection, Prematurity: Retinopathy, Ptosis of Upper Lid, Retrobulbar Orbital Hemorrhage, Trachoma, Other Eye Disorders<br>Injury or Laceration: Eyelid, Periocular, Cornea, Conjunctiv<br>Injury: Eyes, Nonionizing Radiation<br>Keratitis: Acanthamoeba, Bacterial<br>Neoplasm, Benign: Eye | Sympaticomimetic agents<br>parasympaticomimetic agents<br>anhydrase inhibitors<br>ophthalmic beta blockers |                                                                                                     |                  |
| <b>Gastrointestinal</b>       | Anorectal Suppuration, Celiac Disease, Clostridium difficile Colitis, Crohn's Disease, Diverticular Disease, Food Poisoning: Other Organisms (stage 3), Functional Digestive Disorders, Gastritis, Hemorrhoids, Hernia (External), Hernia (Hiatal or Reflux Esophagitis), Intussusception (stage 2), Irritable Bowel Syndrome, Gastroenteritis                                                                                                                                                                                                                                                                                                                 | Intestinal corticosteroids agents<br>H2 antagonists<br>prostaglandins<br>proton pump inhibitors            | 2005-2009: Visits prescribed due to the presence of Gastrointestinal Diseases<br>Beginning in 2010, |                  |

A-4

1  
2  
3  
4  
5  
6  
7  
8  
9  
10  
11  
12  
13  
14  
15  
16  
17  
18  
19  
20  
21  
22  
23  
24  
25  
26  
27  
28  
29  
30  
31  
32  
33  
34  
35  
36  
37  
38  
39  
40  
41  
42  
43  
44  
45  
46  
47  
48  
49

| Body System or Etiology Group | Hospital Discharge data                                                                                                                                                                                                                                                                                                                                                                                                                                                                                                                                                                                                       | Outpatient pharmacy data                      | Home health care                                                                                                                                                                                 | Specialty visits               |
|-------------------------------|-------------------------------------------------------------------------------------------------------------------------------------------------------------------------------------------------------------------------------------------------------------------------------------------------------------------------------------------------------------------------------------------------------------------------------------------------------------------------------------------------------------------------------------------------------------------------------------------------------------------------------|-----------------------------------------------|--------------------------------------------------------------------------------------------------------------------------------------------------------------------------------------------------|--------------------------------|
|                               | Neoplasm, Benign: Adenomatous Polyps, Colon, Small Bowel, Other Gastrointestinal System<br>Peptic Ulcer Disease, Salmonellosis (stage 3), Ulcerative Colitis, Vascular Insufficiency of the Bowels, Complications of Gastrointestinal Treatment, Gastroenteritis (stage 2/3)<br>Other Diseases of Esophagus, Stomach, and Duodenum<br>Other Gastrointestinal Disorders, Other Gastrointestinal Infections (stage 2), Other Gastrointestinal or Abdominal Symptoms<br>Anomaly: Congenital Megacolon, Other Digestive or Hepatobiliary System<br>Burns, Chemical: Esophagus, Stomach, or Small Intestine, Laceration: Esophagus |                                               | the following ICD-9-CM codes were in the record: 520-539,550-579                                                                                                                                 |                                |
| <b>Genitourinary</b>          | Bladder Disorders, Calculus of the Urinary Tract, Glomerulonephritis, Acute, Injury: Urinary Tract, Nephrotic Syndrome (stage 2/3), Renal Failure (stage 2/3), Urethritis, Urinary Tract Infections, Neoplasm, Benign: Urinary Tract, Other Disorders of Kidney or Ureter, Other Urinary Symptoms, Encounter for Dialysis, Anomaly: Defects of Kidney, Defects of Lower Genitourinary Tract, Syphilis: Congenital                                                                                                                                                                                                             | Agents for hyperkalemia and hyperphosphatemia | 2005-2009: Visits prescribed due to the presence of renal failure and Other diseases of the genito-urinary system<br>Beginning in 2010, the following ICD-9-CM codes were in the record: 580-629 | Visits prescribed for dialysis |

| Body System or Etiology Group       | Hospital Discharge data                                                                                                                                                                                                                                                                                                                                                                      | Outpatient pharmacy data                                            | Home health care                                                                                                              | Specialty visits |
|-------------------------------------|----------------------------------------------------------------------------------------------------------------------------------------------------------------------------------------------------------------------------------------------------------------------------------------------------------------------------------------------------------------------------------------------|---------------------------------------------------------------------|-------------------------------------------------------------------------------------------------------------------------------|------------------|
| <b>Gynecological and Obstetrics</b> | Anomaly: External Female Genitalia, Anomaly: Uterus, Dysfunctional Uterine Bleeding, Endometriosis, Neoplasm, Benign: Ovary (stage 2), Pelvic Inflammatory Disease, Uterine Infection, Uterovaginal Prolapse, Vulvovaginitis, Other Disorders of Female Genital System                                                                                                                       |                                                                     |                                                                                                                               |                  |
| <b>Hematological</b>                | Agranulocytosis, Anemia: Aplastic, Acquired (stage 2/3), Folic Acid Deficiency, Hemolytic (stage 2/3), Iron Deficiency, Sickle Cell, Thalassemia, Vitamin B-12 Deficiency, Other Graft versus Host reaction, Hemophilia A or B, Polycythemia Vera, Other Disorders of Blood and Blood-Forming Organs                                                                                         | Iron<br>vitamin B12<br>folic acids                                  | Beginning in 2010, the following ICD-9-CM codes were in the record: 280-289                                                   |                  |
| <b>Hepatobiliary</b>                | Cholecystitis and Cholelithiasis, Cirrhosis of the Liver (stage 2/3), Disorders of Bilirubin Excretion, Hepatitis A, Hepatitis B, Hepatitis C, Hepatitis D, Hepatitis E, Hepatitis G, Hepatitis (Chemical), Pancreatitis, Wilson's Disease, Neoplasm, Benign: Hepatobiliary System, Other Hepatobiliary and Pancreatic Disorders, Other Hepatobiliary Infections, Other Pancreatic Disorders | Interferons<br>blood substitutes and<br>plasmatic protein fractions |                                                                                                                               |                  |
| <b>Immunologic Diseases</b>         | Human Immunodeficiency Virus Type I (HIV) Infection, Other Immunodeficient Disorders, Pneumonia: Pneumocystis carinii                                                                                                                                                                                                                                                                        | Nucleosides and nucleotides<br>reverse transcriptase inhibitors     | 2005-2009: Visits prescribed due to HIV Infections<br>Beginning in 2010, the following ICD-9-CM codes were in the record: 279 |                  |

1  
2  
3  
4  
5  
6  
7  
8  
9  
10  
11  
12  
13  
14  
15  
16  
17  
18  
19  
20  
21  
22  
23  
24  
25  
26  
27  
28  
29  
30  
31  
32  
33  
34  
35  
36  
37  
38  
39  
40  
41  
42  
43  
44  
45  
46  
47  
48  
49

| Body System or Etiology Group | Hospital Discharge data                                                                                                                                                                                                                                                                                                                                                                                                                                                                                                                                                                                                                                                                                              | Outpatient pharmacy data                                                                                                              | Home health care                                                                                                                                                                        | Specialty visits |
|-------------------------------|----------------------------------------------------------------------------------------------------------------------------------------------------------------------------------------------------------------------------------------------------------------------------------------------------------------------------------------------------------------------------------------------------------------------------------------------------------------------------------------------------------------------------------------------------------------------------------------------------------------------------------------------------------------------------------------------------------------------|---------------------------------------------------------------------------------------------------------------------------------------|-----------------------------------------------------------------------------------------------------------------------------------------------------------------------------------------|------------------|
| <b>Infectious Diseases</b>    | Aspergillosis, Chlamydial Infection Except Trachoma or Pneumonia, Cryptococcosis, Cytomegalovirus Disease (Acquired), Infectious Mononucleosis (stage 2), Mucormycosis, Reye's Syndrome (stage 3), Rubella: Acquired (stage 3), Schistosomiasis, Other Bacterial Infections, Other Fungal Infections, Other Infectious and Parasitic Infections, Other Viral Infections, Cytomegalovirus Disease (Congenital), Parainfluenza Virus Infection, Pneumonia: Chlamydial, Sarcoidosis, Other Respiratory Infections, Scabies                                                                                                                                                                                              |                                                                                                                                       | Beginning in 2010, the following ICD-9-CM codes were in the record: 001-139                                                                                                             |                  |
| <b>Male Genital</b>           | Benign Prostatic Hypertrophy, Gonorrhea: Male, Prostatitis                                                                                                                                                                                                                                                                                                                                                                                                                                                                                                                                                                                                                                                           | Alfa-adrenoreceptor antagonists<br>testosterone 5-alfa reductase inhibitors                                                           |                                                                                                                                                                                         |                  |
| <b>Musculoskeletal</b>        | Vitamin D Deficiency, Dislocation: Knee, Eosinophilia Myalgia Syndrome, Fracture: Acetabulum, Fracture: Calcaneus (stage 2), Fracture: Femur, Except Head or Neck, Fracture: Femur, Head or Neck, Fracture: Fibula (stage 2), Fracture: Humerus (Shaft), Fracture: Humerus (Supracondylar) (stage 2), Fracture: Radial Shaft, Ulna or Olecranon (stage 2), Fracture: Radius, Lower End (stage 2), Fracture: Tibia (stage 2/3), Fracture or Dislocation: Patella (stage 2), Fracture or Sprain: Ankle (stage 2), Fracture, Dislocation, or Sprain: Facial Bones (stage 2/3), Fracture, Dislocation, or Sprain: Foot (stage 2), Fracture, Dislocation, or Sprain: Hip or Pelvis (stage 2/3), Fracture, Dislocation, or | Colchicine<br>uric acid inhibitors<br>antiinflammatory non-steroids<br>gold salts<br>aminoquinolines<br>bisphosphonates<br>calcitonin | 2005-2009: Visits prescribed due to the presence of Arthrosis, Arthritis and other osteo-muscular and connective diseases, and Fractures of femurs and other consequences of fractures. |                  |

| Body System or Etiology Group | Hospital Discharge data                                                                                                                                                                                                                                                                                                                                                                                                                                                                                                                                                                                                                                                                                                                                                                                                                                                                                                                                                                                                                                                                                      | Outpatient pharmacy data                                                                                                                   | Home health care                                                                                       | Specialty visits |
|-------------------------------|--------------------------------------------------------------------------------------------------------------------------------------------------------------------------------------------------------------------------------------------------------------------------------------------------------------------------------------------------------------------------------------------------------------------------------------------------------------------------------------------------------------------------------------------------------------------------------------------------------------------------------------------------------------------------------------------------------------------------------------------------------------------------------------------------------------------------------------------------------------------------------------------------------------------------------------------------------------------------------------------------------------------------------------------------------------------------------------------------------------|--------------------------------------------------------------------------------------------------------------------------------------------|--------------------------------------------------------------------------------------------------------|------------------|
|                               | Sprain: Humerus (Head) or Shoulder (stage 2), Fracture, Dislocation, or Sprain: Wrist or Hand or Fingers (stage 2), Gout, Herniated Intervertebral Disc, Infectious Arthritis (stage 2/3), Injury, Chest Wall, Injury, Knee, Semilunar Cartilages (stage 2), Injury, Open Wound, or Blunt Trauma: Lower Extremity (stage 2), Injury, Open Wound, or Blunt Trauma: Upper Extremity (stage 2/3), Muscular Dystrophy, Osteoarthritis, Osteochondrodysplasia, Osteomalacia, Osteomyelitis (stage 2/3), Osteoporosis, Progressive Systemic Sclerosis, Rheumatoid Arthritis, Scoliosis of the Thoracic Spine, Spondylitis, Ankylosing, Systemic Lupus Erythematosus, Anomaly: Musculoskeletal System, Injury: Other and Ill-Defined Musculoskeletal Sites, Neoplasm, Benign: Musculoskeletal Syst. or Connective Tissue, Other Arthropathies, Bone and Joint Disorders, Other Disorders of Connective Tissue, Other Spinal and Back Disorders, Myasthenia Gravis, Complications of Surgical and Medical Care (stage 1), Injury, Open Wound, or Blunt Trauma: Abdomen or Trunk (stage 2/3), Injury: Other (stage 3) |                                                                                                                                            | Beginning in 2010, the following ICD-9-CM codes were in the record: 710-739                            |                  |
| <b>Neurologic Diseases</b>    | Down's Syndrome, Herpes zoster, Poliomyelitis, Post-Polio Syndrome, Syphilis: Acquired, Tetanus (stage 1), Toxoplasmosis: Acquired (stage 3), Amyotrophic Lateral Sclerosis, Cerebral Palsy, Cerebrovascular Disease, Disease of Nervous System Secondary to Implants or Grafts, Epilepsy, Guillain-Barre Syndrome (stage 2), Headache (stage 2), Huntington's Chorea, Injury: Craniocerebral,                                                                                                                                                                                                                                                                                                                                                                                                                                                                                                                                                                                                                                                                                                               | Anticholinesterase agents<br>anticonvulsivant<br>barbiturates and congeners<br>alprostadil<br>ergot alkaloids<br>5HT1 agonists<br>dopamine | 2005-2009: Visits prescribed due to the presence of Dementia and Alzheimer's syndrome, Parkinson's and |                  |

1  
2  
3  
4  
5  
6  
7  
8  
9  
10  
11  
12  
13  
14  
15  
16  
17  
18  
19  
20  
21  
22  
23  
24  
25  
26  
27  
28  
29  
30  
31  
32  
33  
34  
35  
36  
37  
38  
39  
40  
41  
42  
43  
44  
45  
46  
47  
48  
49

| Body System or Etiology Group | Hospital Discharge data                                                                                                                                                                                                                                                                                                                                                                                                                                                                                    | Outpatient pharmacy data                 | Home health care                                                                                                                                                                                                         | Specialty visits |
|-------------------------------|------------------------------------------------------------------------------------------------------------------------------------------------------------------------------------------------------------------------------------------------------------------------------------------------------------------------------------------------------------------------------------------------------------------------------------------------------------------------------------------------------------|------------------------------------------|--------------------------------------------------------------------------------------------------------------------------------------------------------------------------------------------------------------------------|------------------|
|                               | Injury: Spine and spinal cord, Meningitis, Encephalitis, and Myelitis: Viral, Meningitis: Bacterial, Mental Retardation, Multiple Sclerosis, Neurofibromatosis Type I [Von Recklinghausen's Disease], Parkinson's Disease, Other CNS Inflammation, Infection, or Disorder, Other Cranial Nerve Disorders, Other Neurological Conditions, Other Peripheral Nerve Disorders, Other Spinal Lesions, Anomaly: Neural Tube Defects, Rubella: Congenital (stage 2), Anomaly: Other Nervous System, Injury: Other | MAO b inhibitors                         | other CNS degenerative disease, hemiplegia, monoplegia, and other associated syndroms, and acute and chronic cerebrovascular diseases<br>Beginning in 2010, the following ICD-9-CM codes were in the record: 320-389,797 |                  |
| <b>Psychological</b>          | Dementia: Primary Degenerative (Alzheimer's or Pick's), Antisocial Personality Disorder, Bipolar Disorder - Major Depressive Episode, Bipolar Disorder - Manic Episode, Depression, Generalized Anxiety Disorder, Obsessive-Compulsive Neurosis, Schizophrenia, Autism, Other Neuroses, Other Psychoses<br>Drug Abuse, Dependence, Intoxication: Alcohol, Amphetamine, Barbiturate, Cannabis, Cocaine, Hallucinogen, Opioid, Other<br>Eating disorders: Anorexia Nervosa, Bulimia Nervosa                  | Antidepressants<br>antipsychotics agents | 2005-2009: Visits prescribed due to the presence of psychoses, neuroses, and mental retardation<br>Beginning in 2010, the following ICD-9-CM codes were in the record: 290-319                                           |                  |

| Body System or Etiology Group | Hospital Discharge data                                                                                                                                                                                                                                                                                                                                                                                                                                                                                                                                                                                                                                                                                                                | Outpatient pharmacy data                                                                                                                                                                         | Home health care                                                                                                                                                            | Specialty visits |
|-------------------------------|----------------------------------------------------------------------------------------------------------------------------------------------------------------------------------------------------------------------------------------------------------------------------------------------------------------------------------------------------------------------------------------------------------------------------------------------------------------------------------------------------------------------------------------------------------------------------------------------------------------------------------------------------------------------------------------------------------------------------------------|--------------------------------------------------------------------------------------------------------------------------------------------------------------------------------------------------|-----------------------------------------------------------------------------------------------------------------------------------------------------------------------------|------------------|
| <b>Respiratory</b>            | Coxsackie and ECHO Infections (stage 2/3), Anomaly: Tracheoesophageal Malformations, Asbestosis, Asthma, Berylliosis, Byssinosis, Chronic Obstructive Pulmonary Disease, Coal Miner's Pneumoconiosis, Croup, Cystic Fibrosis, Emphysema, Hypersensitivity Pneumonitis, Influenza, Mycoplasma pneumoniae Infection, Parainfluenza Virus Infection (stage 2), Pneumonia: Bacterial, Pneumonia: Legionella, Pulmonary Alveolar Proteinosis, Pulmonary Embolism (stage 3), Radiation Pneumonitis, Silicosis, Tuberculosis, Complications of Tracheostomy, Other Disorders of Respiratory System, Other Respiratory Disease Due to External Agents, Other Respiratory Symptoms, Pneumonia: Aspiration, Neoplasm, Benign: Respiratory System | Inhaled corticosteroids<br>beta-2-adrenoreceptor agonists<br>xanthines<br>leucotrienies antagonists<br>cromolyn<br>pancreatic enzymes<br>mucolytics<br>antituberculosis antibiotics<br>isoniazid | 2005-2009: Visits prescribed due to the presence of respiratory diseases<br>Beginning in 2010, the following ICD-9-CM codes were in the record: 460-519                     |                  |
| <b>Skin</b>                   | Herpes Virus Ocular Infection (stage 1), Urticaria, Candida (Monilial) Infections, Clostridial Wound Infection (stage 2), Herpes Simplex Infections, Complications of Surgical and Medical Care (stage 2/3), Anomaly: Integument (Genodermatoses), Decubitus Ulcers, Erythema Multiforme, Erythroderma, Immunologically Mediated Blistering Skin Diseases, Infections of Skin and Subcutaneous Tissue, Neoplasm, Malignant: Carcinoma, Basal Cell (stage 1), Neoplasm: Atypical Nevus (stage 1), Psoriasis Vulgaris, Other Inflammations & Infections of Skin & SubQ Tissue, Burns, Neoplasm, Benign: Skin or Subcutaneous Tissue (stage 1)                                                                                            | Oral and topical antipsoriasis agents                                                                                                                                                            | 2005-2009: Visits prescribed due to the presence of decubitus ulcers and other skin diseases<br>Beginning in 2010, the following ICD-9-CM codes were in the record: 680-709 |                  |

A-10



1  
2  
3  
4  
5  
6  
7  
8  
9  
10  
11  
12  
13  
14  
15  
16  
17  
18  
19  
20  
21  
22  
23  
24  
25  
26  
27  
28  
29  
30  
31  
32  
33  
34  
35  
36  
37  
38  
39  
40  
41  
42  
43  
44  
45  
46  
47  
48  
49

For peer review only

A-11

## Appendix: Regression coefficients and significance levels

## Females 18-34

| Variable                                                           | Coefficient | p-value |
|--------------------------------------------------------------------|-------------|---------|
| Intercept                                                          | -5.0771     | <.0001  |
| Number of Chronic Conditions (from any data source = 1)            | 0.4347      | <.0001  |
| Number of Chronic Conditions (from any data source = 2)            | 0.8614      | <.0001  |
| Number of Chronic Conditions (from any data source = 3)            | 1.1305      | <.0001  |
| Number of Chronic Conditions (from any data source = 4 or more)    | 1.7194      | <.0001  |
| Number of Chronic Conditions (from hospital data = 1)              | 0.9074      | <.0001  |
| Number of Chronic Conditions (from hospital data = 2 or more)      | 0.8834      | <.0001  |
| Total number of ER visits                                          | 0.2634      | <.0001  |
| History of Obesity-Stage 2 or 3 *                                  | 1.6342      | <.0001  |
| History of polypharmacy *                                          | 0.5968      | <.0001  |
| History of Drug Abuse, Dependence, Intoxication: Alcohol-Stage 1 * | 2.1087      | <.0001  |

## Males 18-34

| Variable                                                                | Coefficient | p-value |
|-------------------------------------------------------------------------|-------------|---------|
| Intercept                                                               | -5.2835     | <.0001  |
| Number of Chronic Conditions (from any data source) = 1                 | 0.6534      | <.0001  |
| Number of Chronic Conditions (from any data source) = 2                 | 1.2390      | <.0001  |
| Number of Chronic Conditions (from any data source) = 3                 | 1.5240      | <.0001  |
| Number of Chronic Conditions (from any data source) = 4 or more         | 2.0556      | <.0001  |
| Neurologic Diseases (from home health prescription)                     | 1.6802      | <.0001  |
| Renal Failure-Stage 2 or 3                                              | 1.3802      | <.0001  |
| Any Gastrointestinal Disease - Stage 2 (from hospital data)             | 1.1512      | <.0001  |
| Any Neurologic Disease - Stage 3 (from hospital data)                   | 0.8614      | <.0001  |
| Any Psychologic Disease - Stage 2 (from hospital data)                  | 1.0198      | <.0001  |
| Any Respiratory Disease - Stage 2 (from hospital data)                  | 0.9451      | <.0001  |
| Anti-arrhythmics                                                        | 1.5415      | <.0001  |
| Total number of ER visits                                               | 0.2371      | <.0001  |
| History of Neurologic Diseases (from drug prescriptions) *              | 0.4880      | <.0001  |
| History of Crohns Disease-Stage 2 or 3 *                                | 1.4684      | 0.0004  |
| History of Neoplasm, Malignant: Colon and Rectum-Stage 2 *              | 2.9037      | 0.0063  |
| History of Calculus of the Urinary Tract-Stage 1 *                      | 1.0806      | <.0001  |
| History of Cirrhosis of the Liver-Stage 2 or 3 *                        | 1.2212      | <.0001  |
| History of Pancreatitis-any stage *                                     | 1.7777      | <.0001  |
| History of Cerebrovascular Disease-Stage 2 *                            | 2.0588      | 0.0004  |
| History of Obesity-Stage 2 or 3 *                                       | 1.6569      | <.0001  |
| History of polypharmacy *                                               | 0.4747      | <.0001  |
| History of Drug Abuse, Dependence, Intoxication: Alcohol-Stage 2 or 3 * | 1.6103      | <.0001  |

1  
2  
3 Hospitalization 0.6338 <.0001  
4  
5  
6  
7  
8

9  
10 **Females 35-44**

| Variable                                                                  | Coefficient | p-value |
|---------------------------------------------------------------------------|-------------|---------|
| Intercept                                                                 | -4.9905     | <.0001  |
| Number of Chronic Conditions (from any data source) = 1                   | 0.5265      | <.0001  |
| Number of Chronic Conditions (from any data source) = 2                   | 0.8446      | <.0001  |
| Number of Chronic Conditions (from any data source) = 3                   | 0.8519      | <.0001  |
| Number of Chronic Conditions (from any data source) = 4 or more           | 0.6525      | 0.0155  |
| Number of Chronic Conditions (from any data source) = 5 or more           | 0.5419      | 0.0934  |
| Number of Chronic Conditions (from hospital data) = 1                     | 0.8319      | <.0001  |
| Number of Chronic Conditions (from hospital data) = 2                     | 1.0387      | <.0001  |
| Number of Chronic Conditions (from hospital data) = 3 or more             | 1.3840      | <.0001  |
| Number of Chronic Conditions (from home health prescription)=1<br>or more | 0.5128      | 0.0390  |
| Number of Chronic Conditions (from drug prescriptions)=1                  | -0.0948     | 0.3171  |
| Number of Chronic Conditions (from drug prescriptions)=2                  | 0.0670      | 0.6542  |
| Number of Chronic Conditions (from drug prescriptions)=3 or more          | 0.2362      | 0.2746  |
| Reside in Mountain area on 12/ 31/ 2012                                   | 0.1865      | 0.0196  |
| Reside in Hill area on 12/ 31/ 2012                                       | -0.0128     | 0.7341  |
| Cardiovascular Disease (from home health prescription)                    | 1.7641      | 0.0006  |
| Endocrine Disease (from home health prescription)                         | 1.5904      | 0.0930  |
| Infectious Disease (from home health prescription)                        | 1.6836      | 0.0468  |
| Genitourinary (dialysis)                                                  | 0.7208      | 0.0081  |
| Aortic Stenosis-Stage 1                                                   | 2.2652      | 0.0004  |
| Arrhythmias-Stage 2                                                       | 1.0050      | 0.0016  |
| Neoplasm, Malignant: Stomach-Stage 3                                      | 1.8592      | 0.0204  |
| Neoplasm, Malignant: Breast, Female-Stage 3                               | 0.7628      | 0.0204  |
| Progressive Systemic Sclerosis-Stage 1                                    | 0.9852      | 0.0321  |
| Progressive Systemic Sclerosis-Stage 2 or 3                               | 1.6206      | 0.0087  |
| Obesity-Stage 2 or 3                                                      | 0.4604      | 0.0039  |
| Drug Abuse, Dependence, Intoxication: Alcohol-Stage 1                     | 0.6965      | 0.0223  |
| Drug Abuse, Dependence, Intoxication: Alcohol-Stage 2 or 3                | 0.7457      | 0.0325  |
| Neoplasm, Malignant: Lungs, Bronchi, or Mediastinum-Stage 3               | 1.6501      | 0.0187  |
| Any Cancer - Stage 3 (from hospital data)                                 | 1.2094      | <.0001  |
| Any Cardiovascular Disease - Stage 1 (from hospital data)                 | -0.5051     | 0.0014  |
| Any Gastrointestinal Disease - Stage 2 (from hospital data)               | 0.4724      | 0.0065  |
| Any Genitourinary Disease - Stage 2 (from hospital data)                  | 0.3895      | 0.0581  |
| Any Gynecologic Disease - Stage 1 (from hospital data)                    | -0.5549     | <.0001  |
| Any Hepatobiliary Disease - Stage 1 (from hospital data)                  | -0.5393     | 0.0029  |
| Any Musculoskeletal Disease - Stage 1 (from hospital data)                | -0.4858     | 0.0002  |

|    |                                                                          |         |        |
|----|--------------------------------------------------------------------------|---------|--------|
| 1  |                                                                          |         |        |
| 2  |                                                                          |         |        |
| 3  | Any Neurologic Disease - Stage 3 (from hospital data)                    | 0.8922  | <.0001 |
| 4  | Any Psychologic Disease - Stage 2 (from hospital data)                   | 0.5166  | 0.0038 |
| 5  | Any Respiratory Disease - Stage 2 (from hospital data)                   | 0.5162  | 0.0436 |
| 6  | Endocrine Disease (from drug prescriptions)                              | -0.4482 | <.0001 |
| 7  | Genitourinary Disease (from drug prescriptions)                          | 0.9552  | 0.0001 |
| 8  | Respiratory Disease (from drug prescriptions)                            | -0.2258 | 0.0107 |
| 9  | Cardiovascular Disease (from any data source)                            | -0.2700 | 0.0118 |
| 10 | Day hospitalization                                                      | -0.2627 | 0.0004 |
| 11 | ACE/ARB                                                                  | 0.2465  | 0.0266 |
| 12 | Digitalis glycosides                                                     | 0.9678  | 0.0285 |
| 13 | Number of ER visits labeled 'Yellow'                                     | -0.2515 | 0.0378 |
| 14 | Total number of ER visits                                                | 0.4548  | 0.0001 |
| 15 | Eye Disease (from any data source)                                       | -0.5158 | 0.0174 |
| 16 | History of Cancer (from drug prescriptions) *                            | 0.2289  | 0.0247 |
| 17 | History of Endocrine Disease (from drug prescriptions) *                 | 0.1529  | 0.0624 |
| 18 | History of Psychological Disease (from drug prescriptions) *             | 0.2272  | <.0001 |
| 19 | History of Arrhythmias-Stage 2 *                                         | 0.4871  | 0.0794 |
| 20 | History of Cardiomyopathies-Stage 3 *                                    | 1.1771  | 0.0262 |
| 21 | History of Thrombophlebitis-Stage 2 or 3 *                               | 0.9344  | 0.0030 |
| 22 | History of Diabetes Mellitus Type 1 or Type 2-Stage 2 *                  | 1.1944  | <.0001 |
| 23 | History of Crohns Disease-Stage 2 or 3 *                                 | 0.7513  | 0.0377 |
| 24 | History of Neoplasm, Malignant: Colon and Rectum-Stage 3 *               | 2.0723  | <.0001 |
| 25 | History of Calculus of the Urinary Tract-Stage 1 *                       | 0.4914  | 0.0146 |
| 26 | History of Calculus of the Urinary Tract-Stage 2 or 3 *                  | 0.8776  | 0.0003 |
| 27 | History of Neoplasm, Malignant: Kidneys-Stage 1 *                        | 1.3977  | 0.0102 |
| 28 | History of Neoplasm, Malignant: Kidneys-Stage 3 *                        | 3.2491  | 0.0100 |
| 29 | History of Pancreatitis-any stage *                                      | 0.8084  | 0.0199 |
| 30 | History of Cerebrovascular Disease-Stage 1 *                             | 0.8172  | 0.0057 |
| 31 | History of Cerebrovascular Disease-Stage 2 *                             | 1.1315  | 0.0013 |
| 32 | History of Obesity-Stage 2 or 3 *                                        | 1.2321  | <.0001 |
| 33 | History of polypharmacy *                                                | 0.3345  | <.0001 |
| 34 | History of Bipolar Disorder - Major Depressive Episode-Stage 2 or 3 *    | 0.6431  | 0.0246 |
| 35 | History of Bipolar Disorder - Manic Episode-Stage 2 *                    | 0.8255  | <.0001 |
| 36 | History of Depression-Stage 1 or 2 *                                     | 0.2207  | 0.0716 |
| 37 | History of Drug Abuse, Dependence, Intoxication: Alcohol-Stage 1 *       | 0.5358  | 0.0330 |
| 38 | History of Chronic Obstructive Pulmonary Disease-Stage 1 or 2 *          | 0.9824  | 0.0003 |
| 39 | History of Chronic Obstructive Pulmonary Disease-Stage 3 *               | 1.8886  | 0.0964 |
| 40 | History of Neoplasm, Malignant: Lungs, Bronchi, or Mediastinum-Stage 1 * | 1.6543  | 0.0122 |
| 41 | History of Pneumonia: Bacterial-Stage 3 *                                | 1.3040  | 0.0015 |
| 42 | Immunologic Disease (from any data source)                               | 0.8590  | 0.0001 |
| 43 | Polypharmacy                                                             | 0.2838  | <.0001 |
| 44 | Number of the other 9 Cardiovascular drugs                               | 0.1330  | 0.0036 |
| 45 |                                                                          |         |        |
| 46 |                                                                          |         |        |
| 47 |                                                                          |         |        |
| 48 |                                                                          |         |        |
| 49 |                                                                          |         |        |
| 50 |                                                                          |         |        |
| 51 |                                                                          |         |        |
| 52 |                                                                          |         |        |
| 53 |                                                                          |         |        |
| 54 |                                                                          |         |        |
| 55 |                                                                          |         |        |
| 56 |                                                                          |         |        |
| 57 |                                                                          |         |        |
| 58 |                                                                          |         |        |
| 59 |                                                                          |         |        |
| 60 |                                                                          |         |        |

## Males 35-44

| Variable                                                      | Coefficient | p-value |
|---------------------------------------------------------------|-------------|---------|
| Intercept                                                     | -4.8083     | <.0001  |
| Number of Chronic Conditions (from any data source)=1         | 0.5439      | <.0001  |
| Number of Chronic Conditions (from any data source)=2         | 0.7994      | <.0001  |
| Number of Chronic Conditions (from any data source)=3         | 0.7949      | <.0001  |
| Number of Chronic Conditions (from any data source)=4         | 1.1832      | <.0001  |
| Number of Chronic Conditions (from any data source)=5 or more | 0.9615      | <.0001  |
| Age on 12/ 31/ 2012                                           | -0.00005    | 0.0031  |
| Cancer (from home health prescription)                        | 1.6698      | 0.0023  |
| Blood Diseases (from home health prescription)                | 2.7427      | 0.0385  |
| Infectious Disease (from home health prescription)            | 3.1524      | 0.0129  |
| Neurologic Diseases (from home health prescription)           | 2.0454      | <.0001  |
| Genitourinary (dialysis)                                      | 1.0696      | <.0001  |
| Cardiomyopathies-Stage 3                                      | 1.7220      | 0.0016  |
| Infective Endocarditis-Stage 3                                | 3.7783      | 0.0015  |
| Mitral Stenosis-Stage 3                                       | 3.0377      | 0.0345  |
| Pericarditis: Chronic-Stage 2 or 3                            | 1.2938      | 0.0240  |
| Crohns Disease-Stage 1                                        | 1.6408      | <.0001  |
| Neoplasm, Malignant: Colon and Rectum-Stage 2                 | 1.4659      | 0.0030  |
| Cirrhosis of the Liver-Stage 2 or 3                           | 0.6646      | 0.0066  |
| Neoplasm, Malignant: Pancreas-Stage 1                         | 2.4864      | 0.0143  |
| Pancreatitis-all stages                                       | 0.8241      | 0.0053  |
| Cerebrovascular Disease-Stage 3                               | 0.9540      | <.0001  |
| Epilepsy-all stages                                           | 0.5515      | 0.0247  |
| Drug Abuse, Dependence, Intoxication: Alcohol-Stage 1         | 0.6065      | 0.0050  |
| Any Cancer - Stage 3 (from hospital data)                     | 1.7602      | <.0001  |
| Any Endocrine Disease - Stage 1 (from hospital data)          | -0.5267     | 0.0028  |
| Any Endocrine - Stage 2 (from hospital data)                  | 0.5688      | 0.0028  |
| Any Gastrointestinal Disease - Stage 1 (from hospital data)   | -1.5927     | <.0001  |
| Any Immunologic Disease - All stages (from hospital data)     | 0.6498      | 0.0068  |
| Any Psychologic Disease - Stage 2 (from hospital data)        | 0.7963      | <.0001  |
| Any Psychologic Disease - Stage 3 (from hospital data)        | 1.4603      | 0.0014  |
| Endocrine Disease (from drug prescriptions)                   | 0.2204      | 0.0058  |
| Number of day hospitalizations                                | 0.2078      | 0.0003  |
| Oral anti-coagulants                                          | 0.4822      | 0.0028  |
| Anti-arrhythmics                                              | 0.7069      | 0.0027  |
| Total number of ER visits                                     | 0.2455      | <.0001  |
| Eye Disease (from any data source)                            | -0.4757     | 0.0200  |
| History of Neurological Disease (from drug prescriptions) *   | 0.3728      | <.0001  |
| History of Psychological Disease (from drug prescriptions) *  | 0.2678      | <.0001  |
| History of Arrhythmias-Stage 2 *                              | 0.7259      | 0.0008  |
| History of Cardiomyopathies-Stage 2 *                         | 0.8655      | 0.0009  |

\*History variables are calculated on previous 5 years of exposure data  
 For peer review only - <http://bmjopen.bmj.com/site/about/guidelines.xhtml>

|    |                                                                         |         |        |
|----|-------------------------------------------------------------------------|---------|--------|
| 1  |                                                                         |         |        |
| 2  |                                                                         |         |        |
| 3  | History of Essential Hypertension-Stage 3 *                             | 0.8004  | 0.0062 |
| 4  | History of Pericarditis: Viral or Traumatic-Stage 2 or 3 *              | 1.0253  | 0.0008 |
| 5  | History of Diabetes Mellitus Type 1 or Type 2-Stage 2 *                 | 0.7425  | 0.0034 |
| 6  | History of Diabetes Mellitus Type 1 or Type 2-Stage 3 *                 | 0.7380  | 0.0071 |
| 7  | History of Crohns Disease-Stage 2 or 3 *                                | 1.3269  | <.0001 |
| 8  | History of Calculus of the Urinary Tract-Stage 1 *                      | 0.7919  | <.0001 |
| 9  | History of Renal Failure-Stage 2 or 3 *                                 | 0.5494  | 0.0107 |
| 10 | History of Cholecystitis and Cholelithiasis-Stage 3 *                   | 1.4633  | 0.0012 |
| 11 | History of Cirrhosis of the Liver-Stage 2 or 3 *                        | 0.5857  | 0.0009 |
| 12 | History of Pancreatitis-any stage *                                     | 1.2530  | <.0001 |
| 13 | History of Progressive Systemic Sclerosis-Stage 2 or 3 *                | 3.8605  | 0.0026 |
| 14 | History of Obesity-Stage 2 or 3 *                                       | 0.8764  | <.0001 |
| 15 | History of Bipolar Disorder - Manic Episode-Stage 2 *                   | 0.8467  | <.0001 |
| 16 | History of Drug Abuse, Dependence, Intoxication: Alcohol-Stage 1 *      | 0.5825  | 0.0005 |
| 17 |                                                                         |         |        |
| 18 | History of Drug Abuse, Dependence, Intoxication: Alcohol-Stage 2 or 3 * | 0.7745  | <.0001 |
| 19 |                                                                         |         |        |
| 20 | History of Chronic Obstructive Pulmonary Disease-Stage 1 or 2 *         | 0.7316  | 0.0018 |
| 21 | History of Pneumonia: Bacterial-Stage 3 *                               | 1.0518  | 0.0006 |
| 22 | History of Other Cardiovascular drugs *                                 | 0.2342  | 0.0043 |
| 23 | Hospitalization                                                         | 0.7414  | <.0001 |
| 24 | Gastrointestinal Disease (from hospital data)                           | 0.9745  | <.0001 |
| 25 | Respiratory Disease (from hospital data)                                | 0.4067  | 0.0025 |
| 26 | Any of the other 9 Cardiovascular drugs                                 | -0.5914 | <.0001 |
| 27 | Number of the other 9 Cardiovascular drugs                              | 0.2767  | <.0001 |
| 28 |                                                                         |         |        |
| 29 |                                                                         |         |        |
| 30 |                                                                         |         |        |
| 31 |                                                                         |         |        |
| 32 |                                                                         |         |        |
| 33 |                                                                         |         |        |
| 34 |                                                                         |         |        |
| 35 |                                                                         |         |        |
| 36 |                                                                         |         |        |
| 37 |                                                                         |         |        |
| 38 |                                                                         |         |        |
| 39 |                                                                         |         |        |
| 40 |                                                                         |         |        |
| 41 |                                                                         |         |        |
| 42 |                                                                         |         |        |
| 43 |                                                                         |         |        |
| 44 |                                                                         |         |        |
| 45 |                                                                         |         |        |
| 46 |                                                                         |         |        |
| 47 |                                                                         |         |        |
| 48 |                                                                         |         |        |
| 49 |                                                                         |         |        |
| 50 |                                                                         |         |        |
| 51 |                                                                         |         |        |
| 52 |                                                                         |         |        |
| 53 |                                                                         |         |        |
| 54 |                                                                         |         |        |
| 55 |                                                                         |         |        |
| 56 |                                                                         |         |        |
| 57 |                                                                         |         |        |
| 58 |                                                                         |         |        |
| 59 |                                                                         |         |        |
| 60 |                                                                         |         |        |

### Females 45-54

| Variable                                                               | Coefficient | p-value |
|------------------------------------------------------------------------|-------------|---------|
| Intercept                                                              | -4.9051     | <.0001  |
| Number of Chronic Conditions (from any data source)=1                  | 0.3066      | <.0001  |
| Number of Chronic Conditions (from any data source)=2                  | 0.4393      | <.0001  |
| Number of Chronic Conditions (from any data source)=3                  | 0.4533      | <.0001  |
| Number of Chronic Conditions (from any data source)=4                  | 0.3924      | 0.0002  |
| Number of Chronic Conditions (from any data source)=5 or more          | 0.3544      | 0.0079  |
| Number of Chronic Conditions (from hospital data)=1                    | 0.4819      | <.0001  |
| Number of Chronic Conditions (from hospital data)=2                    | 0.6828      | <.0001  |
| Number of Chronic Conditions (from hospital data)=3 or more            | 0.8788      | <.0001  |
| Number of Chronic Conditions (from home health prescription)=1 or more | 0.9174      | <.0001  |
| Reside in Mountain area on 12/ 31/ 2012                                | 0.2243      | 0.0008  |
| Reside in Hill area on 12/ 31/ 2012                                    | -0.0104     | 0.7596  |
| Essential Hypertension-Stage 1                                         | -0.3166     | 0.0082  |
| Pericarditis: Chronic-Stage 2 or 3                                     | 2.0018      | 0.0001  |

|    |                                                              |         |        |
|----|--------------------------------------------------------------|---------|--------|
| 1  |                                                              |         |        |
| 2  |                                                              |         |        |
| 3  | Neoplasm, Malignant: Colon and Rectum-Stage 2                | 0.8110  | 0.0074 |
| 4  | Cholecystitis and Cholelithiasis-Stage 2                     | 0.8570  | 0.0043 |
| 5  | Cirrhosis of the Liver-Stage 2 or 3                          | 0.4736  | 0.0176 |
| 6  | Pancreatitis-all stages                                      | 0.8873  | 0.0217 |
| 7  | Progressive Systemic Sclerosis-Stage 2 or 3                  | 0.9823  | 0.0173 |
| 8  | Cerebrovascular Disease-Stage 1                              | 0.5623  | 0.0340 |
| 9  | Cerebrovascular Disease-Stage 3                              | -0.6910 | 0.0224 |
| 10 | Obesity-Stage 2 or 3                                         | 0.4054  | 0.0063 |
| 11 | Neoplasm, Malignant: Lungs, Bronchi, or Mediastinum-Stage 2  | 1.3912  | 0.0132 |
| 12 | Any Cancer - Stage 3 (from hospital data)                    | 1.7066  | <.0001 |
| 13 | Any Ear,Nose,Throat Disease - Stage 1 (from hospital data)   | -0.6186 | 0.0401 |
| 14 | Any Gastrointestinal Disease - Stage 1 (from hospital data)  | -0.4730 | <.0001 |
| 15 | Any Gynecologic Disease - Stage 1 (from hospital data)       | -0.5578 | <.0001 |
| 16 | Any Infectious Disease - Stage 3 (from hospital data)        | -1.8556 | 0.0017 |
| 17 | Any Musculoskeletal Disease - Stage 1 (from hospital data)   | -0.4338 | <.0001 |
| 18 | Any Neurologic Disease - Stage 3 (from hospital data)        | 1.0267  | <.0001 |
| 19 | Any Psychologic Disease - Stage 1 (from hospital data)       | -0.2591 | 0.0256 |
| 20 | Any Psychologic Disease - Stage 2 (from hospital data)       | 0.4123  | 0.0034 |
| 21 | Any Psychologic Disease - Stage 3 (from hospital data)       | 1.3041  | 0.0042 |
| 22 | Any Respiratory Disease - Stage 2 (from hospital data)       | 0.4618  | 0.0149 |
| 23 | Any Respiratory Disease - Stage 3 (from hospital data)       | 0.7372  | 0.0009 |
| 24 | Any Skin Disease - Stage 1 (from hospital data)              | -0.3787 | 0.0245 |
| 25 | Gastrointestinal Disease (from drug prescriptions)           | 0.2535  | <.0001 |
| 26 | Genitourinary Disease (from drug prescriptions)              | 1.1262  | <.0001 |
| 27 | Oral anti-coagulants                                         | 0.3753  | 0.0063 |
| 28 | Anti-arrhythmics                                             | 0.7321  | <.0001 |
| 29 | Digitalis glycosides                                         | 0.9270  | 0.0003 |
| 30 | Total number of ER visits                                    | 0.2068  | <.0001 |
| 31 | History of Cancer (from drug prescriptions) *                | 0.1500  | 0.0286 |
| 32 | History of Psychological Disease (from drug prescriptions) * | 0.2010  | <.0001 |
| 33 | History of Aortic Stenosis-Stage 3 *                         | 1.6666  | 0.0170 |
| 34 | History of Coronary Artery Disease-Stage 3 *                 | 0.5560  | 0.0019 |
| 35 | History of Diabetes Mellitus Type 1 or Type 2-Stage 2 *      | 1.0444  | <.0001 |
| 36 | History of Diabetes Mellitus Type 1 or Type 2-Stage 3 *      | 0.6990  | 0.0012 |
| 37 | History of Crohns Disease-Stage 2 or 3 *                     | 1.3534  | <.0001 |
| 38 | History of Neoplasm, Malignant: Colon and Rectum-Stage 3 *   | 0.9831  | 0.0009 |
| 39 | History of Neoplasm, Malignant: Stomach-Stage 3 *            | 2.1435  | 0.0007 |
| 40 | History of Ulcerative Colitis-any stage *                    | 0.6736  | 0.0177 |
| 41 | History of Calculus of the Urinary Tract-Stage 1 *           | 0.7453  | <.0001 |
| 42 | History of Calculus of the Urinary Tract-Stage 2 or 3 *      | 0.5209  | 0.0218 |
| 43 | History of Renal Failure-Stage 2 or 3 *                      | 0.5702  | 0.0006 |
| 44 | History of Neoplasm, Malignant: Ovaries-Stage 2 or 3 *       | 0.7030  | 0.0286 |
| 45 | History of Anemia: Aplastic, Acquired-Stage 2 or 3 *         | 0.7484  | 0.0026 |
| 46 | History of Cirrhosis of the Liver-Stage 2 or 3 *             | 0.4895  | 0.0014 |
| 47 |                                                              |         |        |
| 48 |                                                              |         |        |
| 49 |                                                              |         |        |
| 50 |                                                              |         |        |
| 51 |                                                              |         |        |
| 52 |                                                              |         |        |
| 53 |                                                              |         |        |
| 54 |                                                              |         |        |
| 55 |                                                              |         |        |
| 56 |                                                              |         |        |
| 57 |                                                              |         |        |
| 58 |                                                              |         |        |
| 59 |                                                              |         |        |
| 60 |                                                              |         |        |

|                                                                          |         |        |
|--------------------------------------------------------------------------|---------|--------|
| History of Pancreatitis-any stage *                                      | 0.7645  | 0.0043 |
| History of Cerebrovascular Disease-Stage 3 *                             | 0.3947  | 0.0087 |
| History of Obesity-Stage 2 or 3 *                                        | 0.8330  | <.0001 |
| History of polypharmacy *                                                | 0.2928  | <.0001 |
| History of Bipolar Disorder - Major Depressive Episode-Stage 2 or 3 *    | 0.6454  | 0.0038 |
| History of Bipolar Disorder - Manic Episode-Stage 2 *                    | 0.6630  | 0.0001 |
| History of Depression-Stage 1 or 2 *                                     | 0.4957  | <.0001 |
| History of Drug Abuse, Dependence, Intoxication: Alcohol-Stage 1 *       | 0.6357  | 0.0005 |
| History of Drug Abuse, Dependence, Intoxication: Alcohol-Stage 2 or 3 *  | 1.1324  | <.0001 |
| History of Chronic Obstructive Pulmonary Disease-Stage 1 or 2 *          | 0.4127  | 0.0104 |
| History of Chronic Obstructive Pulmonary Disease-Stage 3 *               | 1.3247  | 0.0050 |
| History of Neoplasm, Malignant: Lungs, Bronchi, or Mediastinum-Stage 3 * | 1.6041  | <.0001 |
| History of Neoplasm, Malignant: Melanoma-Stage 3 *                       | 1.6975  | 0.0026 |
| History of Other Cardiovascular drugs *                                  | 0.1255  | 0.0236 |
| Immunologic Disease (from any data source)                               | 0.7145  | 0.0003 |
| Infectious Disease (from any data source)                                | 0.5052  | 0.0335 |
| Neurologic Disease (from any data source)                                | 0.2075  | 0.0003 |
| Hospitalization                                                          | 0.3975  | <.0001 |
| Polypharmacy                                                             | 0.2655  | <.0001 |
| Any of the other 9 Cardiovascular drugs                                  | -0.2999 | 0.0008 |
| Number of the other 9 Cardiovascular drugs                               | 0.1482  | <.0001 |

### Males 45-54

| Variable                                                               | Coefficient | p-value |
|------------------------------------------------------------------------|-------------|---------|
| Intercept                                                              | -4.4469     | <.0001  |
| Number of Chronic Conditions (from any data source)=1                  | 0.3859      | <.0001  |
| Number of Chronic Conditions (from any data source)=2                  | 0.6634      | <.0001  |
| Number of Chronic Conditions (from any data source)=3                  | 0.7465      | <.0001  |
| Number of Chronic Conditions (from any data source)=4                  | 0.7901      | <.0001  |
| Number of Chronic Conditions (from any data source)=5 or more          | 0.5246      | <.0001  |
| Number of Chronic Conditions (from hospital data)=1                    | 0.2577      | 0.0009  |
| Number of Chronic Conditions (from hospital data)=2                    | 0.3237      | 0.0015  |
| Number of Chronic Conditions (from hospital data)=3 or more            | 0.4067      | 0.0021  |
| Number of Chronic Conditions (from home health prescription)=1 or more | 0.8811      | <.0001  |
| Age on 12 /31/ 2012                                                    | -0.00008    | <.0001  |
| Cancer (chemo or radiation )                                           | 0.5498      | 0.0011  |



|    |                                                             |         |        |
|----|-------------------------------------------------------------|---------|--------|
| 1  |                                                             |         |        |
| 2  |                                                             |         |        |
| 3  | Genitourinary (dialysis)                                    | 0.9242  | <.0001 |
| 4  | Aortic Stenosis-Stage 3                                     | 2.0591  | 0.0014 |
| 5  | Arrhythmias-Stage 2                                         | 0.5607  | 0.0005 |
| 6  | Essential Hypertension-Stage 2                              | -0.6186 | 0.0030 |
| 7  | Neoplasm, Malignant Hematologic-Stage 3                     | -1.5129 | 0.0096 |
| 8  | Cirrhosis of the Liver-Stage 2 or 3                         | 0.8760  | <.0001 |
| 9  | Pancreatitis-all stages                                     | 0.9702  | <.0001 |
| 10 | Chronic Obstructive Pulmonary Disease-Stage 3               | 1.2772  | 0.0051 |
| 11 | Neoplasm, Malignant: Lungs, Bronchi, or Mediastinum-Stage 3 | 1.5413  | <.0001 |
| 12 | Any Cancer - Stage 3 (from hospital data)                   | 1.5337  | <.0001 |
| 13 | Any Cardiovascular - Stage 3 (from hospital data)           | 0.4528  | <.0001 |
| 14 | Any Endocrine Disease - Stage 1 (from hospital data)        | -0.2681 | 0.0085 |
| 15 | Any Endocrine - Stage 2 (from hospital data)                | 0.3403  | 0.0055 |
| 16 | Any Gastrointestinal Disease - Stage 2 (from hospital data) | 0.7672  | <.0001 |
| 17 | Any Immunologic Disease - All stages (from hospital data)   | 0.7049  | <.0001 |
| 18 | Any Musculoskeletal Disease - Stage 1 (from hospital data)  | -0.3976 | <.0001 |
| 19 | Any Neurologic Disease - Stage 3 (from hospital data)       | 0.4660  | 0.0008 |
| 20 | Any Psychologic Disease - Stage 2 (from hospital data)      | 0.8976  | <.0001 |
| 21 | Cardiovascular Disease (from drug prescriptions)            | -0.1612 | 0.0030 |
| 22 | Eye Disease (from drug prescriptions)                       | -0.5308 | <.0001 |
| 23 | Genitourinary Disease (from drug prescriptions)             | 0.4405  | 0.0099 |
| 24 | Hematologic Disease (from drug prescriptions)               | 0.5097  | 0.0070 |
| 25 | Hepatobiliary Disease (from drug prescriptions)             | 0.3691  | 0.0179 |
| 26 | Number of day hospitalizations                              | 0.1160  | 0.0093 |
| 27 | Statins                                                     | -0.1389 | 0.0112 |
| 28 | Anti-platelets                                              | 0.2288  | <.0001 |
| 29 | Anti-arrhythmics                                            | 0.3517  | 0.0063 |
| 30 | Nitrates                                                    | 0.4390  | <.0001 |
| 31 | Total number of ER visits                                   | 0.1627  | <.0001 |
| 32 | History of Cancer (from drug prescriptions) *               | 0.3251  | 0.0004 |
| 33 | History of Aortic Stenosis-Stage 1 *                        | -0.9794 | 0.0150 |
| 34 | History of Arrhythmias-Stage 2 *                            | 0.3919  | 0.0019 |
| 35 | History of Cardiomyopathies-Stage 3 *                       | 0.7836  | <.0001 |
| 36 | History of Coronary Artery Disease-Stage 1 *                | 0.3743  | <.0001 |
| 37 | History of Thrombophlebitis-Stage 2 or 3 *                  | 0.7954  | <.0001 |
| 38 | History of Diabetes Mellitus Type 1 or Type 2-Stage 1 *     | 0.3220  | 0.0001 |
| 39 | History of Diabetes Mellitus Type 1 or Type 2-Stage 3 *     | 0.8677  | <.0001 |
| 40 | History of Calculus of the Urinary Tract-Stage 1 *          | 0.3374  | 0.0033 |
| 41 | History of Renal Failure-Stage 2 or 3 *                     | 0.4042  | 0.0033 |
| 42 | History of Cholecystitis and Cholelithiasis-Stage 1 *       | 0.5888  | 0.0001 |
| 43 | History of Cirrhosis of the Liver-Stage 2 or 3 *            | 0.4954  | <.0001 |
| 44 | History of Neoplasm, Malignant: Pancreas-Stage 2 or 3 *     | 1.9346  | 0.0029 |
| 45 | History of Pancreatitis-any stage *                         | 0.5981  | 0.0009 |
| 46 | History of Obesity-Stage 2 or 3 *                           | 0.5126  | <.0001 |
| 47 |                                                             |         |        |
| 48 |                                                             |         |        |
| 49 |                                                             |         |        |
| 50 |                                                             |         |        |
| 51 |                                                             |         |        |
| 52 |                                                             |         |        |
| 53 |                                                             |         |        |
| 54 |                                                             |         |        |
| 55 |                                                             |         |        |
| 56 |                                                             |         |        |
| 57 |                                                             |         |        |
| 58 |                                                             |         |        |
| 59 |                                                             |         |        |
| 60 |                                                             |         |        |

|                                                                         |         |        |
|-------------------------------------------------------------------------|---------|--------|
| History of polypharmacy *                                               | 0.2306  | <.0001 |
| History of Bipolar Disorder - Manic Episode-Stage 2 *                   | 0.8192  | <.0001 |
| History of Depression-Stage 1 or 2 *                                    | 0.2814  | 0.0098 |
| History of Drug Abuse, Dependence, Intoxication: Alcohol-Stage 1 *      | 0.4287  | 0.0020 |
| History of Drug Abuse, Dependence, Intoxication: Alcohol-Stage 2 or 3 * | 0.9474  | <.0001 |
| History of Pneumonia: Bacterial-Stage 3 *                               | 1.1780  | <.0001 |
| History of Other Cardiovascular drugs *                                 | 0.2404  | <.0001 |
| Male Genital System (from any data source)                              | -0.3177 | 0.0021 |
| Neurologic Disease (from any data source)                               | 0.2173  | 0.0002 |
| Hospitalization                                                         | 0.4249  | <.0001 |
| Number of hospitalizations                                              | 0.0445  | 0.1777 |
| Polypharmacy                                                            | 0.2976  | <.0001 |
| Gastrointestinal Disease (from hospital data)                           | -0.2445 | 0.0085 |

#### Females 55-64

| Variable                                                               | Coefficient | p-value |
|------------------------------------------------------------------------|-------------|---------|
| Intercept                                                              | 0.9467      | 0.6785  |
| Number of Chronic Conditions (from any data source)=1                  | 0.5017      | <.0001  |
| Number of Chronic Conditions (from any data source)=2                  | 0.6666      | <.0001  |
| Number of Chronic Conditions (from any data source)=3                  | 0.7010      | <.0001  |
| Number of Chronic Conditions (from any data source)=4                  | 0.7868      | 0.0001  |
| Number of Chronic Conditions (from any data source)=5                  | 0.7545      | 0.0024  |
| Number of Chronic Conditions (from any data source)=6 or more          | 0.5597      | 0.0587  |
| Number of Chronic Conditions (from hospital data)=1                    | 0.5017      | <.0001  |
| Number of Chronic Conditions (from hospital data)=2                    | 0.6365      | <.0001  |
| Number of Chronic Conditions (from hospital data)=3                    | 0.7653      | <.0001  |
| Number of Chronic Conditions (from hospital data)=4 or more            | 0.7953      | 0.0007  |
| Number of Chronic Conditions (from home health prescription)=1 or more | 0.4889      | <.0001  |
| Number of Chronic Conditions (from drug prescriptions)=1               | -0.3395     | 0.0003  |
| Number of Chronic Conditions (from drug prescriptions)=2               | -0.3996     | 0.0020  |
| Number of Chronic Conditions (from drug prescriptions)=3               | -0.4436     | 0.0073  |
| Number of Chronic Conditions (from drug prescriptions)=4               | -0.5404     | 0.0083  |
| Number of Chronic Conditions (from drug prescriptions)=5 or more       | -0.4198     | 0.0955  |
| Age on 12/ 31/ 2012                                                    | -0.1094     | 0.0134  |
| Endocrine Disease (from home health prescription)                      | 0.9016      | 0.0026  |
| Gastrointestinal Disease (from home health prescription)               | -0.6807     | 0.1725  |
| Genitourinary Disease (from home health prescription)                  | 1.1277      | 0.1537  |
| Blood Diseases (from home health prescription)                         | -1.8804     | 0.1597  |
| Infectious Disease (from home health prescription)                     | 1.2458      | 0.0624  |
| Musculoskeletal Disease (from home health prescription)                | 0.7627      | 0.0235  |

|    |                                                       |         |        |
|----|-------------------------------------------------------|---------|--------|
| 1  |                                                       |         |        |
| 2  |                                                       |         |        |
| 3  | Neurologic Diseases (from home health prescription)   | 0.7672  | 0.0003 |
| 4  | Respiratory Diseases (from home health prescription)  | 1.0350  | 0.0211 |
| 5  | Skin Disease (from home health prescription)          | 0.4575  | 0.2643 |
| 6  | Cancer (chemo or radiation )                          | 0.2011  | 0.0741 |
| 7  | Genitourinary (dialysis)                              | -0.2335 | 0.2676 |
| 8  | Aneurysm, Thoracic-all stages                         | 0.7181  | 0.1737 |
| 9  | Arrhythmias-Stage 1                                   | -0.8531 | 0.1853 |
| 10 | Arrhythmias-Stage 3                                   | -0.4355 | 0.3839 |
| 11 | Congestive Heart Failure-Stage3                       | 0.5326  | 0.0248 |
| 12 | Essential Hypertension-Stage 2                        | -0.4672 | 0.0156 |
| 13 | Mitral Stenosis-Stage 1                               | 0.3593  | 0.1871 |
| 14 | Mitral Stenosis-Stage 2                               | 0.4834  | 0.2609 |
| 15 | Pericarditis: Viral or Traumatic-Stage 2 or 3         | -1.2494 | 0.1428 |
| 16 | Thrombophlebitis-Stage 2 or 3                         | 0.3434  | 0.2209 |
| 17 | Tibial/Iliac/Femoral/Popliteal Artery Disease-Stage 1 | 0.2126  | 0.4831 |
| 18 | Diabetes Mellitus Type 1 or Type 2-Stage 3            | -1.2846 | 0.0001 |
| 19 | Hyperthyroidism-Stage 1                               | -0.6448 | 0.1376 |
| 20 | Hypothyroidism-Stage 1                                | -0.1514 | 0.2913 |
| 21 | Hypothyroidism-Stage 2 or 3                           | -0.4319 | 0.2665 |
| 22 | Crohns Disease-Stage 2 or 3                           | -1.3093 | 0.2190 |
| 23 | Diverticular Disease-Stage 1                          | -0.3203 | 0.2326 |
| 24 | Diverticular Disease-Stage 2 or 3                     | -1.7244 | 0.0142 |
| 25 | Gastritis-Stage 2 or 3                                | -0.4282 | 0.3525 |
| 26 | Hernia, Hiatal or Reflux Esophagitis-Stage 1          | -0.4908 | 0.0465 |
| 27 | Hernia, Hiatal or Reflux Esophagitis-Stage 2 or 3     | -0.6378 | 0.2767 |
| 28 | Neoplasm, Malignant: Colon and Rectum-Stage 2         | -0.6795 | 0.0391 |
| 29 | Neoplasm, Malignant: Colon and Rectum-Stage 3         | 0.9264  | <.0001 |
| 30 | Neoplasm, Malignant: Stomach-Stage 1                  | 0.5593  | 0.2519 |
| 31 | Neoplasm, Malignant: Stomach-Stage 3                  | 0.6181  | 0.1650 |
| 32 | Ulcerative Colitis-all stages                         | 0.5059  | 0.1961 |
| 33 | Neoplasm, Malignant: Bladder, Urinary-Stage 1         | -0.3433 | 0.3353 |
| 34 | Neoplasm, Malignant: Kidneys-Stage 1                  | 0.3389  | 0.3869 |
| 35 | Renal Failure-Stage 2 or 3                            | 0.3465  | 0.0464 |
| 36 | Neoplasm, Malignant: Breast, Female-Stage 1           | -0.9369 | <.0001 |
| 37 | Neoplasm, Malignant: Ovaries-Stage 1                  | -0.7428 | 0.0657 |
| 38 | Anemia: Aplastic, Acquired-Stage 2 or 3               | 0.3219  | 0.2666 |
| 39 | Neoplasm, Malignant Hematologic-Stage 1               | -0.4013 | 0.0971 |
| 40 | Neoplasm, Malignant Hematologic-Stage 2               | -0.6307 | 0.0974 |
| 41 | Neoplasm, Malignant Hematologic-Stage 3               | -0.5380 | 0.2971 |
| 42 | Cholecystitis and Cholelithiasis-Stage 1              | 0.7769  | 0.0033 |
| 43 | Cholecystitis and Cholelithiasis-Stage 2              | 1.3013  | 0.0057 |
| 44 | Cirrhosis of the Liver-Stage 2 or 3                   | 0.7679  | <.0001 |
| 45 | Neoplasm, Malignant: Pancreas-Stage 1                 | 0.8360  | 0.0386 |
| 46 | Neoplasm, Malignant: Pancreas-Stage 2 or 3            | 1.3469  | 0.0051 |
| 47 |                                                       |         |        |
| 48 |                                                       |         |        |
| 49 |                                                       |         |        |
| 50 |                                                       |         |        |
| 51 |                                                       |         |        |
| 52 |                                                       |         |        |
| 53 |                                                       |         |        |
| 54 |                                                       |         |        |
| 55 |                                                       |         |        |
| 56 |                                                       |         |        |
| 57 |                                                       |         |        |
| 58 |                                                       |         |        |
| 59 |                                                       |         |        |
| 60 |                                                       |         |        |

|    |                                                             |         |        |
|----|-------------------------------------------------------------|---------|--------|
| 1  |                                                             |         |        |
| 2  |                                                             |         |        |
| 3  | Pancreatitis-all stages                                     | 1.0560  | 0.0079 |
| 4  | Progressive Systemic Sclerosis-Stage 2 or 3                 | 1.0431  | 0.0155 |
| 5  | Cerebrovascular Disease-Stage 1                             | 0.2701  | 0.2083 |
| 6  | Cerebrovascular Disease-Stage 2                             | -0.2745 | 0.2425 |
| 7  | Cerebrovascular Disease-Stage 3                             | -0.2845 | 0.3180 |
| 8  | Dementia: Primary Degenerative (Alzheimer or Pick)-Stage 1  | 0.6421  | 0.0743 |
| 9  | Epilepsy-all stages                                         | -0.4298 | 0.1025 |
| 10 | Bipolar Disorder - Major Depressive Episode-Stage 2 or 3    | -0.5924 | 0.2896 |
| 11 | Depression-Stage 1 or 2                                     | 0.1495  | 0.4002 |
| 12 | Drug Abuse, Dependence, Intoxication: Alcohol-Stage 1       | -0.6312 | 0.2187 |
| 13 | Drug Abuse, Dependence, Intoxication: Alcohol-Stage 2 or 3  | 0.4370  | 0.1568 |
| 14 | Chronic Obstructive Pulmonary Disease-Stage 1 or 2          | 0.1433  | 0.4617 |
| 15 | Neoplasm, Malignant: Lungs, Bronchi, or Mediastinum-Stage 1 | 0.4562  | 0.0554 |
| 16 | Neoplasm, Malignant: Lungs, Bronchi, or Mediastinum-Stage 3 | 0.4995  | 0.0489 |
| 17 | Pneumonia: Bacterial-Stage 1                                | 0.3737  | 0.0753 |
| 18 | Pneumonia: Bacterial-Stage 3                                | -0.4891 | 0.1195 |
| 19 | Pulmonary Embolism-Stage 3                                  | 0.8005  | 0.0250 |
| 20 | Any Cancer - Stage 1 (from hospital data)                   | 0.2989  | 0.0931 |
| 21 | Any Cancer - Stage 2 (from hospital data)                   | 0.2308  | 0.2732 |
| 22 | Any Cancer - Stage 3 (from hospital data)                   | 0.8552  | <.0001 |
| 23 | Any Cardiovascular Disease - Stage 1 (from hospital data)   | -0.2364 | 0.0023 |
| 24 | Any Cardiovascular Disease - Stage 2 (from hospital data)   | 0.0953  | 0.3950 |
| 25 | Any Cardiovascular Disease - Stage 3 (from hospital data)   | 0.1844  | 0.1691 |
| 26 | Any Endocrine - Stage 2 (from hospital data)                | 0.4515  | <.0001 |
| 27 | Any Endocrine Disease - Stage 3 (from hospital data)        | 0.7544  | 0.0013 |
| 28 | Any Ear,Nose,Throat Disease - Stage 2 (from hospital data)  | -0.8908 | 0.3948 |
| 29 | Any Gastrointestinal Disease - Stage 2 (from hospital data) | 0.3647  | 0.0445 |
| 30 | Any Hepatobiliary Disease - Stage 1 (from hospital data)    | -0.6278 | 0.0950 |
| 31 | Any Hepatobiliary Disease - Stage 2 (from hospital data)    | -0.4898 | 0.3504 |
| 32 | Any Infectious Disease - Stage 3 (from hospital data)       | -0.3543 | 0.3858 |
| 33 | Any Neurologic Disease - Stage 2 (from hospital data)       | 0.5032  | 0.0016 |
| 34 | Any Neurologic Disease - Stage 3 (from hospital data)       | 0.4457  | 0.0740 |
| 35 | Any Psychologic Disease - Stage 1 (from hospital data)      | -0.2030 | 0.1733 |
| 36 | Any Psychologic Disease - Stage 2 (from hospital data)      | 0.1866  | 0.3379 |
| 37 | Any Psychologic Disease - Stage 3 (from hospital data)      | 0.9858  | 0.0302 |
| 38 | Any Respiratory Disease – Stage 1 (from hospital data)      | -0.3063 | 0.0617 |
| 39 | Any Respiratory Disease - Stage 3 (from hospital data)      | 0.9969  | <.0001 |
| 40 | Any Skin Disease - Stage 2 (from hospital data)             | -0.5257 | 0.1185 |
| 41 | Neoplasm, Malignant: Melanoma-Stage 2                       | -1.2688 | 0.1880 |
| 42 | Neoplasm, Malignant: Melanoma-Stage 3                       | 1.5149  | 0.0037 |
| 43 | Cancer (from any data source)                               | -0.3957 | 0.0036 |
| 44 | Cancer (from drug prescription)                             | 0.4367  | 0.0002 |
| 45 | Eye Disease (from drug prescriptions)                       | 0.4615  | 0.0460 |
| 46 | Gastrointestinal Disease (from drug prescriptions)          | 0.0544  | 0.1584 |
| 47 |                                                             |         |        |
| 48 |                                                             |         |        |
| 49 |                                                             |         |        |
| 50 |                                                             |         |        |
| 51 |                                                             |         |        |
| 52 |                                                             |         |        |
| 53 |                                                             |         |        |
| 54 |                                                             |         |        |
| 55 |                                                             |         |        |
| 56 |                                                             |         |        |
| 57 |                                                             |         |        |
| 58 |                                                             |         |        |
| 59 |                                                             |         |        |
| 60 |                                                             |         |        |

|    |                                                                         |         |        |
|----|-------------------------------------------------------------------------|---------|--------|
| 1  |                                                                         |         |        |
| 2  |                                                                         |         |        |
| 3  | Genitourinary Disease (from drug prescriptions)                         | 0.2762  | 0.1949 |
| 4  | Immunologic Disease (from drug prescriptions)                           | -1.0597 | 0.0780 |
| 5  | Psychological Disease (from drug prescriptions)                         | -0.1619 | 0.3523 |
| 6  | Respiratory Disease (from drug prescriptions)                           | 0.2058  | 0.0005 |
| 7  | Skin Disease (from drug prescriptions)                                  | 0.1296  | 0.4503 |
| 8  | Day hospitalization                                                     | -0.0504 | 0.4576 |
| 9  | Drug-Drug interactions                                                  | 0.2803  | 0.0229 |
| 10 | Statins                                                                 | -0.2104 | <.0001 |
| 11 | Beta-blockers                                                           | 0.0461  | 0.1974 |
| 12 | Anti-platelets                                                          | 0.1061  | 0.0107 |
| 13 | Calcium channel blockers                                                | 0.0933  | 0.0329 |
| 14 | Anti-arrhythmics                                                        | 0.2835  | 0.0060 |
| 15 | Digitalis glycosides                                                    | -0.2094 | 0.2138 |
| 16 | Nitrates                                                                | 0.4632  | <.0001 |
| 17 | Diuretics                                                               | 0.2687  | <.0001 |
| 18 | Ear,Nose,Throat Disease (from any data source)                          | -0.3916 | 0.1154 |
| 19 | Number of ER visits labeled 'Yellow'                                    | 0.0881  | 0.2672 |
| 20 | Total number of ER visits                                               | 0.1621  | 0.0341 |
| 21 | Eye Disease (from any data source)                                      | -0.6320 | 0.0043 |
| 22 | Genitourinary Disease (from any data source)                            | 0.7024  | 0.0014 |
| 23 | Gynecologic Disease (from any data source)                              | -0.6085 | <.0001 |
| 24 | Hematologic Disease (from any data source)                              | 0.2896  | 0.0019 |
| 25 | Hepatobiliary Disease (from any data source)                            | 0.4386  | 0.0713 |
| 26 | History of Cancer (from drug prescriptions) *                           | 0.2544  | <.0001 |
| 27 | History of Neurological Disease (from drug prescriptions) *             | 0.0571  | 0.2898 |
| 28 | History of Respiratory Disease (from drug prescriptions) *              | 0.0775  | 0.0855 |
| 29 | History of Aortic Stenosis-Stage 1 *                                    | 0.1809  | 0.4275 |
| 30 | History of Arrhythmias-Stage 2 *                                        | 0.3253  | 0.0041 |
| 31 | History of Arrhythmias-Stage 3 *                                        | 0.3799  | 0.2085 |
| 32 | History of Cardiomyopathies-Stage 2 *                                   | 0.4667  | 0.0155 |
| 33 | History of Congestive Heart Failure-Stage 3 *                           | 0.1210  | 0.4597 |
| 34 | History of Coronary Artery Disease-Stage 1 *                            | 0.3581  | 0.0002 |
| 35 | History of Coronary Artery Disease-Stage 2 *                            | 0.1121  | 0.4469 |
| 36 | History of Coronary Artery Disease-Stage 3 *                            | 0.3913  | 0.0023 |
| 37 | History of Essential Hypertension-Stage 1 *                             | 0.0703  | 0.1748 |
| 38 | History of Infective Endocarditis-Stage 3 *                             | -0.5804 | 0.3469 |
| 39 | History of Mitral Stenosis-Stage 2 *                                    | 0.4323  | 0.1047 |
| 40 | History of Pericarditis: Viral or Traumatic-Stage 2 or 3 *              | -0.5354 | 0.2771 |
| 41 | History of Tibial/Iliac/Femoral/Popliteal Artery Disease-Stage 2 or 3 * | 0.5543  | 0.0659 |
| 42 | History of Diabetes Mellitus Type 1 or Type 2-Stage 1 *                 | 0.3017  | <.0001 |
| 43 | History of Diabetes Mellitus Type 1 or Type 2-Stage 2 *                 | 0.3810  | 0.0005 |
| 44 | History of Diabetes Mellitus Type 1 or Type 2-Stage 3 *                 | 0.4846  | 0.0020 |
| 45 | History of Hypothyroidism-Stage 2 or 3 *                                | 0.2600  | 0.3833 |
| 46 |                                                                         |         |        |
| 47 |                                                                         |         |        |
| 48 |                                                                         |         |        |
| 49 |                                                                         |         |        |
| 50 |                                                                         |         |        |
| 51 |                                                                         |         |        |
| 52 |                                                                         |         |        |
| 53 |                                                                         |         |        |
| 54 |                                                                         |         |        |
| 55 |                                                                         |         |        |
| 56 |                                                                         |         |        |
| 57 |                                                                         |         |        |
| 58 |                                                                         |         |        |
| 59 |                                                                         |         |        |
| 60 |                                                                         |         |        |

|    |                                                                                  |         |        |
|----|----------------------------------------------------------------------------------|---------|--------|
| 1  |                                                                                  |         |        |
| 2  |                                                                                  |         |        |
| 3  | History of Crohns Disease-Stage 2 or 3 *                                         | 0.7668  | 0.0458 |
| 4  | History of Diverticular Disease-Stage 1 *                                        | 0.3579  | 0.0123 |
| 5  |                                                                                  |         |        |
| 6  | History of Diverticular Disease-Stage 2 or 3 *                                   | 0.7500  | 0.0026 |
| 7  | History of Neoplasm, Malignant: Stomach-Stage 3 *                                | 1.3562  | 0.0009 |
| 8  | History of Calculus of the Urinary Tract-Stage 1 *                               | 0.1328  | 0.4254 |
| 9  |                                                                                  |         |        |
| 10 | History of Calculus of the Urinary Tract-Stage 2 or 3 *                          | 0.1600  | 0.4523 |
| 11 | History of Neoplasm, Malignant: Kidneys-Stage 1 *                                | -0.2475 | 0.4638 |
| 12 | History of Neoplasm, Malignant: Kidneys-Stage 3 *                                | 1.1246  | 0.0296 |
| 13 | History of Renal Failure-Stage 2 or 3 *                                          | 0.5356  | <.0001 |
| 14 | History of Neoplasm, Malignant: Breast, Female-Stage 1 *                         | -0.2892 | 0.0025 |
| 15 | History of Neoplasm, Malignant: Breast, Female-Stage 3 *                         | 0.5799  | 0.0001 |
| 16 | History of Neoplasm, Malignant: Ovaries-Stage 2 or 3 *                           | 0.4641  | 0.0675 |
| 17 | History of Anemia: Aplastic, Acquired-Stage 2 or 3 *                             | 0.2917  | 0.1730 |
| 18 | History of Neoplasm, Malignant Hematologic-Stage 2 *                             | 0.2692  | 0.3031 |
| 19 | History of Neoplasm, Malignant Hematologic-Stage 2 *                             | -0.6343 | 0.2195 |
| 20 | History of Cholecystitis and Cholelithiasis-Stage 2 *                            | 0.4606  | 0.0057 |
| 21 | History of Cholecystitis and Cholelithiasis-Stage 3 *                            | -0.3862 | 0.3756 |
| 22 | History of Cirrhosis of the Liver-Stage 2 or 3 *                                 | 0.1037  | 0.4226 |
| 23 | History of Neoplasm, Malignant: Pancreas-Stage 1 *                               | 0.9151  | 0.0222 |
| 24 | History of Neoplasm, Malignant: Pancreas-Stage 2 or 3 *                          | -1.0822 | 0.1459 |
| 25 | History of Pancreatitis-any stage *                                              | 0.2106  | 0.4490 |
| 26 | History of Progressive Systemic Sclerosis-Stage 1 *                              | 0.2697  | 0.2504 |
| 27 | History of Progressive Systemic Sclerosis-Stage 2 or 3 *                         | -0.4137 | 0.2802 |
| 28 | History of Cerebrovascular Disease-Stage 1 *                                     | 0.2919  | 0.0479 |
| 29 | History of Cerebrovascular Disease-Stage 2 *                                     | 0.1387  | 0.2983 |
| 30 | History of Cerebrovascular Disease-Stage 3 *                                     | 0.3321  | 0.0030 |
| 31 | History of Dementia: Primary Degenerative (Alzheimer or Pick)-<br>Stage 1 *      | 0.2370  | 0.3913 |
| 32 | History of Dementia: Primary Degenerative (Alzheimer or Pick)-<br>Stage 2 or 3 * | 1.0816  | 0.1258 |
| 33 | History of Obesity-Stage 2 or 3 *                                                | 0.2556  | 0.0066 |
| 34 | History of polypharmacy *                                                        | 0.1792  | <.0001 |
| 35 | History of Bipolar Disorder - Major Depressive Episode-Stage 2 or<br>3 *         | 0.5506  | 0.0209 |
| 36 | History of Bipolar Disorder - Manic Episode-Stage 2 *                            | 0.6414  | 0.0002 |
| 37 | History of Depression-Stage 1 or 2 *                                             | 0.3655  | <.0001 |
| 38 | History of Drug Abuse, Dependence, Intoxication: Alcohol-Stage 1<br>*            | 0.6588  | 0.0024 |
| 39 | History of Drug Abuse, Dependence, Intoxication: Alcohol-Stage 2<br>or 3 *       | 0.6840  | <.0001 |
| 40 | History of Chronic Obstructive Pulmonary Disease-Stage 1 or 2 *                  | 0.4496  | <.0001 |
| 41 | History of Chronic Obstructive Pulmonary Disease-Stage 3 *                       | 0.9085  | <.0001 |
| 42 | History of Neoplasm, Malignant: Lungs, Bronchi, or Mediastinum-<br>Stage 2 *     | 1.1063  | 0.0136 |
| 43 |                                                                                  |         |        |
| 44 |                                                                                  |         |        |
| 45 |                                                                                  |         |        |
| 46 |                                                                                  |         |        |
| 47 |                                                                                  |         |        |
| 48 |                                                                                  |         |        |
| 49 |                                                                                  |         |        |
| 50 |                                                                                  |         |        |
| 51 |                                                                                  |         |        |
| 52 |                                                                                  |         |        |
| 53 |                                                                                  |         |        |
| 54 |                                                                                  |         |        |
| 55 |                                                                                  |         |        |
| 56 |                                                                                  |         |        |
| 57 |                                                                                  |         |        |
| 58 |                                                                                  |         |        |
| 59 |                                                                                  |         |        |
| 60 |                                                                                  |         |        |

|                                                                          |         |        |
|--------------------------------------------------------------------------|---------|--------|
| History of Neoplasm, Malignant: Lungs, Bronchi, or Mediastinum-Stage 3 * | 0.4570  | 0.1957 |
| History of Pneumonia: Bacterial-Stage 2 *                                | 0.7303  | 0.1047 |
| History of Oral Anti-coagulants *                                        | 0.4605  | <.0001 |
| History of Other Cardiovascular drugs *                                  | 0.0431  | 0.3044 |
| History of Statins *                                                     | 0.0710  | 0.1377 |
| Immunologic Disease (from any data source)                               | 0.7304  | 0.0366 |
| Neurologic Disease (from any data source)                                | 0.2104  | 0.0008 |
| Hospitalization                                                          | 0.2413  | 0.0005 |
| Polypharmacy                                                             | 0.3614  | <.0001 |
| Psychological Disease (from any data source)                             | 0.2990  | 0.0875 |
| Cancer (from hospital data)                                              | 0.2380  | 0.2926 |
| Gastrointestinal Disease (from hospital data)                            | -0.2031 | 0.0659 |
| Genitourinary Disease (from hospital data)                               | -0.4981 | 0.0234 |
| Hepatobiliary (from hospital data)                                       | -0.5335 | 0.2235 |
| Musculoskeletal Disease (from hospital data)                             | -0.4348 | <.0001 |
| Any of the other 9 Cardiovascular drugs                                  | -0.1434 | 0.0142 |

#### Males 55-64

| Variable                                                               | Coefficient | p-value |
|------------------------------------------------------------------------|-------------|---------|
| Intercept                                                              | -4.2367     | <.0001  |
| Number of Chronic Conditions (from any data source)=1                  | 0.3641      | <.0001  |
| Number of Chronic Conditions (from any data source)=2                  | 0.7530      | <.0001  |
| Number of Chronic Conditions (from any data source)=3                  | 1.0181      | <.0001  |
| Number of Chronic Conditions (from any data source)=4                  | 1.2055      | <.0001  |
| Number of Chronic Conditions (from any data source)=5                  | 1.4339      | <.0001  |
| Number of Chronic Conditions (from any data source)=6 or more          | 1.4674      | <.0001  |
| Number of Chronic Conditions (from hospital data)=1                    | 0.4141      | <.0001  |
| Number of Chronic Conditions (from hospital data)=2                    | 0.5725      | <.0001  |
| Number of Chronic Conditions (from hospital data)=3                    | 0.7463      | <.0001  |
| Number of Chronic Conditions (from hospital data)=4 or more            | 0.6436      | 0.0066  |
| Number of Chronic Conditions (from home health prescription)=1 or more | -0.5216     | 0.0939  |
| Number of Chronic Conditions (from drug prescriptions)=1               | -0.0825     | 0.3624  |
| Number of Chronic Conditions (from drug prescriptions)=2               | -0.3715     | 0.0074  |
| Number of Chronic Conditions (from drug prescriptions)=3               | -0.5199     | 0.0060  |
| Number of Chronic Conditions (from drug prescriptions)=4               | -0.7343     | 0.0025  |
| Number of Chronic Conditions (from drug prescriptions)=5 or more       | -0.8378     | 0.0069  |
| Age on 12 /31/ 2012                                                    | -0.00009    | <.0001  |
| Cancer (from home health prescription)                                 | 1.5149      | <.0001  |
| Cardiovascular Disease (from home health prescription)                 | 0.6241      | 0.0555  |
| Endocrine Disease (from home health prescription)                      | 1.2243      | 0.0016  |
| Genitourinary Disease (from home health prescription)                  | 0.5007      | 0.4113  |

|    |                                                         |         |        |
|----|---------------------------------------------------------|---------|--------|
| 1  |                                                         |         |        |
| 2  |                                                         |         |        |
| 3  | Blood Diseases (from home health prescription)          | 1.2676  | 0.2946 |
| 4  | Musculoskeletal Disease (from home health prescription) | 1.2147  | 0.0136 |
| 5  | Neurologic Diseases (from home health prescription)     | 1.5200  | <.0001 |
| 6  | Mental Disorders (from home health prescription)        | 0.9790  | 0.0086 |
| 7  | Respiratory Diseases (from home health prescription)    | 0.5207  | 0.3572 |
| 8  | Skin Disease (from home health prescription)            | 1.2618  | 0.0224 |
| 9  | Cancer (chemo or radiation )                            | 0.4095  | 0.0006 |
| 10 | Genitourinary (dialysis)                                | 0.4977  | 0.0006 |
| 11 | Aneurysm, Abdominal-all stages                          | -0.4983 | 0.0674 |
| 12 | Aneurysm, Thoracic-all stages                           | -1.0860 | 0.0027 |
| 13 | Aortic Stenosis-Stage 3                                 | 0.3053  | 0.4855 |
| 14 | Arrhythmias-Stage 1                                     | 0.3575  | 0.2891 |
| 15 | Arrhythmias-Stage 3                                     | 0.4253  | 0.1234 |
| 16 | Cardiomyopathies-Stage 2                                | 0.1958  | 0.2233 |
| 17 | Cardiomyopathies-Stage 3                                | 0.3422  | 0.0864 |
| 18 | Congestive Heart Failure-Stage3                         | 0.2219  | 0.2411 |
| 19 | Coronary Artery Disease-Stage 1                         | -0.0683 | 0.3883 |
| 20 | Coronary Artery Disease-Stage 2                         | 0.0967  | 0.3847 |
| 21 | Essential Hypertension-Stage 2                          | -0.1509 | 0.2134 |
| 22 | Mitral Stenosis-Stage 2                                 | 0.4867  | 0.0815 |
| 23 | Thrombophlebitis-Stage 1                                | 0.3111  | 0.1622 |
| 24 | Thrombophlebitis-Stage 2 or 3                           | 0.2554  | 0.2361 |
| 25 | Tibial/Iliac/Femoral/Popliteal Artery Disease-Stage 1   | 0.1621  | 0.2869 |
| 26 | Crohns Disease-Stage 1                                  | 1.2423  | 0.0002 |
| 27 | Diverticular Disease-Stage 1                            | 0.1565  | 0.4435 |
| 28 | Diverticular Disease-Stage 2 or 3                       | -0.6513 | 0.1725 |
| 29 | Functional Digestive Disorders-Stage 1                  | 0.2423  | 0.3863 |
| 30 | Hernia, Hiatal or Reflux Esophagitis-Stage 1            | 0.4054  | 0.0335 |
| 31 | Hernia, Hiatal or Reflux Esophagitis-Stage 2 or 3       | 0.3879  | 0.3142 |
| 32 | Neoplasm, Malignant: Colon and Rectum-Stage 2           | -0.3750 | 0.1667 |
| 33 | Neoplasm, Malignant: Colon and Rectum-Stage 3           | 0.1798  | 0.4389 |
| 34 | Neoplasm, Malignant: Stomach-Stage 1                    | 0.3938  | 0.2408 |
| 35 | Neoplasm, Malignant: Stomach-Stage 3                    | 0.5800  | 0.1449 |
| 36 | Calculus of the Urinary Tract-Stage 2 or 3              | 0.2830  | 0.3339 |
| 37 | Neoplasm, Malignant: Bladder, Urinary-Stage 3           | 0.8356  | 0.0617 |
| 38 | Neoplasm, Malignant: Kidneys-Stage 3                    | 0.9161  | 0.0054 |
| 39 | Renal Failure-Stage 2 or 3                              | 0.2518  | 0.0215 |
| 40 | Anemia: Aplastic, Acquired-Stage 2 or 3                 | 0.3357  | 0.2123 |
| 41 | Neoplasm, Malignant Hematologic-Stage 2                 | -0.4371 | 0.1590 |
| 42 | Neoplasm, Malignant Hematologic-Stage 3                 | -0.8421 | 0.0510 |
| 43 | Cholecystitis and Cholelithiasis-Stage 1                | 0.1946  | 0.3670 |
| 44 | Cholecystitis and Cholelithiasis-Stage 2                | 0.7374  | 0.0003 |
| 45 | Cirrhosis of the Liver-Stage 2 or 3                     | 0.6437  | <.0001 |
| 46 | Neoplasm, Malignant: Pancreas-Stage 1                   | 1.1672  | 0.0009 |
| 47 |                                                         |         |        |
| 48 |                                                         |         |        |
| 49 |                                                         |         |        |
| 50 |                                                         |         |        |
| 51 |                                                         |         |        |
| 52 |                                                         |         |        |
| 53 |                                                         |         |        |
| 54 |                                                         |         |        |
| 55 |                                                         |         |        |
| 56 |                                                         |         |        |
| 57 |                                                         |         |        |
| 58 |                                                         |         |        |
| 59 |                                                         |         |        |
| 60 |                                                         |         |        |



|    |                                                                 |         |        |
|----|-----------------------------------------------------------------|---------|--------|
| 1  |                                                                 |         |        |
| 2  |                                                                 |         |        |
| 3  | Neoplasm, Malignant: Pancreas-Stage 2 or 3                      | 0.4115  | 0.3686 |
| 4  | Pancreatitis-all stages                                         | 0.6998  | 0.0093 |
| 5  | Rheumatic Fever- Stage 2                                        | 0.2881  | 0.3795 |
| 6  | Rheumatic Fever- Stage 3                                        | 0.7440  | 0.2101 |
| 7  | Neoplasm, Malignant: Prostate-Stage 2                           | -0.9665 | 0.0008 |
| 8  | Progressive Systemic Sclerosis-Stage 1                          | 1.5792  | 0.0739 |
| 9  | Cerebrovascular Disease-Stage 3                                 | -0.3096 | 0.1750 |
| 10 | Dementia: Primary Degenerative (Alzheimer or Pick)-Stage 1      | 0.3701  | 0.2504 |
| 11 | Dementia: Primary Degenerative (Alzheimer or Pick)-Stage 2 or 3 | -0.8789 | 0.3960 |
| 12 | Bipolar Disorder - Major Depressive Episode-Stage 2 or 3        | 0.4031  | 0.3584 |
| 13 | Bipolar Disorder - Manic Episode-Stage 2                        | 0.3873  | 0.2024 |
| 14 | Depression-Stage 1 or 2                                         | -0.1959 | 0.3188 |
| 15 | Drug Abuse, Dependence, Intoxication: Alcohol-Stage 2 or 3      | 0.5678  | 0.0022 |
| 16 | Chronic Obstructive Pulmonary Disease-Stage 1 or 2              | 0.4929  | 0.0002 |
| 17 | Chronic Obstructive Pulmonary Disease-Stage 3                   | 0.7526  | 0.0053 |
| 18 | Neoplasm, Malignant: Lungs, Bronchi, or Mediastinum-Stage 1     | 0.4482  | 0.0104 |
| 19 | Neoplasm, Malignant: Lungs, Bronchi, or Mediastinum-Stage 3     | 0.7027  | 0.0037 |
| 20 | Pneumonia: Bacterial-Stage 1                                    | 0.4147  | 0.0065 |
| 21 | Pneumonia: Bacterial-Stage 2                                    | -1.0459 | 0.0841 |
| 22 | Any Cancer - Stage 1 (from hospital data)                       | 0.1447  | 0.3765 |
| 23 | Any Cancer - Stage 2 (from hospital data)                       | 0.4529  | 0.0235 |
| 24 | Any Cancer - Stage 3 (from hospital data)                       | 0.8561  | <.0001 |
| 25 | Any Cardiovascular Disease - Stage 1 (from hospital data)       | -0.1085 | 0.2067 |
| 26 | Any Cardiovascular Disease - Stage 3 (from hospital data)       | 0.1646  | 0.0649 |
| 27 | Any Endocrine - Stage 2 (from hospital data)                    | 0.1840  | 0.0457 |
| 28 | Any Endocrine Disease - Stage 3 (from hospital data)            | 0.1092  | 0.4222 |
| 29 | Any Eye Disease - All stages (from hospital data)               | 0.1685  | 0.4757 |
| 30 | Any Gastrointestinal Disease - Stage 1 (from hospital data)     | -0.3016 | 0.0049 |
| 31 | Any Gastrointestinal Disease - Stage 2 (from hospital data)     | 0.2142  | 0.0818 |
| 32 | Any Genitourinary Disease - Stage 2 (from hospital data)        | 0.1929  | 0.4584 |
| 33 | Any Genitourinary Disease - Stage 3 (from hospital data)        | -0.3144 | 0.2654 |
| 34 | Any Male Genital System - All stages (from hospital data)       | -0.4482 | 0.0010 |
| 35 | Any Neurologic Disease - Stage 1 (from hospital data)           | 0.2517  | 0.1493 |
| 36 | Any Neurologic Disease - Stage 2 (from hospital data)           | 0.3684  | 0.0263 |
| 37 | Any Neurologic Disease - Stage 3 (from hospital data)           | 0.6947  | 0.0025 |
| 38 | Any Respiratory Disease - Stage 2 (from hospital data)          | 0.3146  | 0.0525 |
| 39 | Any Respiratory Disease - Stage 3 (from hospital data)          | 0.5118  | 0.0036 |
| 40 | Neoplasm, Malignant: Melanoma-Stage 2                           | -1.0279 | 0.1274 |
| 41 | Neoplasm, Malignant: Melanoma-Stage 3                           | 0.8045  | 0.0919 |
| 42 | Cancer (from any data source)                                   | -0.5680 | <.0001 |
| 43 | Cancer (from drug prescription)                                 | 0.7548  | <.0001 |
| 44 | Cardiovascular Disease (from drug prescriptions)                | -0.2032 | 0.0068 |
| 45 | Eye Disease (from drug prescriptions)                           | 0.4930  | 0.0727 |
| 46 | Gastrointestinal Disease (from drug prescriptions)              | 0.2771  | 0.0301 |
| 47 |                                                                 |         |        |
| 48 |                                                                 |         |        |
| 49 |                                                                 |         |        |
| 50 |                                                                 |         |        |
| 51 |                                                                 |         |        |
| 52 |                                                                 |         |        |
| 53 |                                                                 |         |        |
| 54 |                                                                 |         |        |
| 55 |                                                                 |         |        |
| 56 |                                                                 |         |        |
| 57 |                                                                 |         |        |
| 58 |                                                                 |         |        |
| 59 |                                                                 |         |        |
| 60 |                                                                 |         |        |

|    |                                                                         |         |        |
|----|-------------------------------------------------------------------------|---------|--------|
| 1  |                                                                         |         |        |
| 2  |                                                                         |         |        |
| 3  | Genitourinary Disease (from drug prescriptions)                         | 0.5082  | 0.0008 |
| 4  | Hematologic Disease (from drug prescriptions)                           | 0.7320  | <.0001 |
| 5  | Hepatobiliary Disease (from drug prescriptions)                         | 0.7078  | <.0001 |
| 6  | Musculoskeletal Disease (from drug prescriptions)                       | 0.2658  | 0.0704 |
| 7  | Neurologic Diseases (from drug prescriptions)                           | -0.1106 | 0.4344 |
| 8  | Respiratory Disease (from drug prescriptions)                           | 0.3397  | 0.0140 |
| 9  | Skin Disease (from drug prescriptions)                                  | -0.8534 | 0.0737 |
| 10 | Day hospitalization                                                     | -0.3167 | 0.0005 |
| 11 | Number of day hospitalizations                                          | 0.1936  | 0.0009 |
| 12 | Oral anti-coagulants                                                    | 0.2097  | 0.0073 |
| 13 | Alpha-blockers                                                          | -0.0815 | 0.1273 |
| 14 | Statins                                                                 | -0.1195 | 0.0067 |
| 15 | Beta-blockers                                                           | 0.0758  | 0.0200 |
| 16 | ACE/ARB                                                                 | -0.1067 | 0.0015 |
| 17 | Anti-platelets                                                          | 0.2416  | <.0001 |
| 18 | Anti-arrhythmics                                                        | 0.2796  | <.0001 |
| 19 | Nitrates                                                                | 0.3750  | <.0001 |
| 20 | Diuretics                                                               | 0.1841  | <.0001 |
| 21 | Ear,Nose,Throat Disease (from any data source)                          | -0.4299 | 0.0218 |
| 22 | Total number of ER visits                                               | 0.1667  | <.0001 |
| 23 | Eye Disease (from any data source)                                      | -0.5605 | 0.0459 |
| 24 | Gastrointestinal Disease (from any data source)                         | -0.2670 | 0.0340 |
| 25 | Genitourinary Disease (from any data source)                            | -0.2029 | 0.0436 |
| 26 | Hematologic Disease (from any data source)                              | -0.2489 | 0.0209 |
| 27 | History of Endocrine Disease (from drug prescriptions) *                | 0.1446  | 0.0036 |
| 28 | History of Neurological Disease (from drug prescriptions) *             | 0.1136  | 0.0491 |
| 29 | History of Aortic Stenosis-Stage 1 *                                    | 0.1778  | 0.2745 |
| 30 | History of Aortic Stenosis-Stage 3 *                                    | -0.3400 | 0.2752 |
| 31 | History of Arrhythmias-Stage 2 *                                        | 0.1806  | 0.0180 |
| 32 | History of Cardiomyopathies-Stage 2 *                                   | 0.2800  | 0.0099 |
| 33 | History of Cardiomyopathies-Stage 3 *                                   | 0.2745  | 0.0450 |
| 34 | History of Congestive Heart Failure-Stage 3 *                           | 0.3791  | 0.0032 |
| 35 | History of Coronary Artery Disease-Stage 1 *                            | 0.2123  | <.0001 |
| 36 | History of Coronary Artery Disease-Stage 2 *                            | 0.2602  | 0.0002 |
| 37 | History of Coronary Artery Disease-Stage 3 *                            | 0.1210  | 0.0479 |
| 38 | History of Essential Hypertension-Stage 3 *                             | 0.1309  | 0.1997 |
| 39 | History of Mitral Stenosis-Stage 2 *                                    | 0.1638  | 0.4910 |
| 40 | History of Pericarditis: Chronic-Stage 2 or 3 *                         | -0.6191 | 0.0980 |
| 41 | History of Thrombophlebitis-Stage 2 or 3 *                              | 0.2574  | 0.0966 |
| 42 | History of Tibial/Iliac/Femoral/Popliteal Artery Disease-Stage 2 or 3 * | 0.3798  | 0.0282 |
| 43 | History of Diabetes Mellitus Type 1 or Type 2-Stage 1 *                 | 0.0741  | 0.1711 |
| 44 | History of Diabetes Mellitus Type 1 or Type 2-Stage 2 *                 | 0.2216  | 0.0034 |
| 45 | History of Diabetes Mellitus Type 1 or Type 2-Stage 3 *                 | 0.2666  | 0.0234 |
| 46 |                                                                         |         |        |
| 47 |                                                                         |         |        |
| 48 |                                                                         |         |        |
| 49 |                                                                         |         |        |
| 50 |                                                                         |         |        |
| 51 |                                                                         |         |        |
| 52 |                                                                         |         |        |
| 53 |                                                                         |         |        |
| 54 |                                                                         |         |        |
| 55 |                                                                         |         |        |
| 56 |                                                                         |         |        |
| 57 |                                                                         |         |        |
| 58 |                                                                         |         |        |
| 59 |                                                                         |         |        |
| 60 |                                                                         |         |        |

|    |                                                                                  |         |        |
|----|----------------------------------------------------------------------------------|---------|--------|
| 1  |                                                                                  |         |        |
| 2  |                                                                                  |         |        |
| 3  | History of Hypothyroidism-Stage 1 *                                              | -0.1031 | 0.4735 |
| 4  | History of Crohns Disease-Stage 2 or 3 *                                         | 0.5055  | 0.1168 |
| 5  | History of Diverticular Disease-Stage 1 *                                        | 0.1351  | 0.3093 |
| 6  | History of Diverticular Disease-Stage 2 or 3 *                                   | 0.3463  | 0.1463 |
| 7  | History of Neoplasm, Malignant: Colon and Rectum-Stage 3 *                       | 0.6400  | 0.0005 |
| 8  | History of Neoplasm, Malignant: Stomach-Stage 1 *                                | 0.7035  | 0.0151 |
| 9  | History of Neoplasm, Malignant: Stomach-Stage 3 *                                | 0.7735  | 0.0405 |
| 10 | History of Ulcerative Colitis-any stage *                                        | 0.1614  | 0.4858 |
| 11 | History of Calculus of the Urinary Tract-Stage 1 *                               | 0.1264  | 0.1702 |
| 12 | History of Calculus of the Urinary Tract-Stage 2 or 3 *                          | 0.3105  | 0.0119 |
| 13 | History of Neoplasm, Malignant: Kidneys-Stage 1 *                                | -0.3428 | 0.0948 |
| 14 | History of Renal Failure-Stage 2 or 3 *                                          | 0.3768  | <.0001 |
| 15 | History of Anemia: Aplastic, Acquired-Stage 2 or 3 *                             | 0.4850  | 0.0332 |
| 16 | History of Neoplasm, Malignant Hematologic-Stage 1 *                             | 0.2115  | 0.1691 |
| 17 | History of Neoplasm, Malignant Hematologic-Stage 2 *                             | 0.2152  | 0.3377 |
| 18 | History of Neoplasm, Malignant Hematologic-Stage 2 *                             | -0.5625 | 0.1068 |
| 19 | History of Cholecystitis and Cholelithiasis-Stage 1 *                            | 0.3497  | 0.0041 |
| 20 | History of Cholecystitis and Cholelithiasis-Stage 3 *                            | 0.1889  | 0.4655 |
| 21 | History of Cirrhosis of the Liver-Stage 2 or 3 *                                 | 0.3937  | <.0001 |
| 22 | History of Neoplasm, Malignant: Pancreas-Stage 1 *                               | 0.3556  | 0.3596 |
| 23 | History of Neoplasm, Malignant: Pancreas-Stage 2 or 3 *                          | -0.7080 | 0.2534 |
| 24 | History of Pancreatitis-any stage *                                              | 0.5502  | 0.0003 |
| 25 | History of Rheumatic Fever-Stage 3 *                                             | 0.6045  | 0.2213 |
| 26 | History of Neoplasm, Malignant: Prostate-Stage 2 *                               | -0.3042 | 0.0181 |
| 27 | History of Progressive Systemic Sclerosis-Stage 1 *                              | -1.8861 | 0.1260 |
| 28 | History of Progressive Systemic Sclerosis-Stage 2 or 3 *                         | 1.2042  | 0.1939 |
| 29 | History of Cerebrovascular Disease-Stage 1 *                                     | 0.1150  | 0.3529 |
| 30 | History of Cerebrovascular Disease-Stage 2 *                                     | 0.1580  | 0.0735 |
| 31 | History of Cerebrovascular Disease-Stage 3 *                                     | 0.2798  | 0.0003 |
| 32 | History of Dementia: Primary Degenerative (Alzheimer or Pick)-<br>Stage 1 *      | 0.5172  | 0.0355 |
| 33 | History of Dementia: Primary Degenerative (Alzheimer or Pick)-<br>Stage 2 or 3 * | 0.9102  | 0.1461 |
| 34 | History of Obesity-Stage 2 or 3 *                                                | 0.2153  | 0.0147 |
| 35 | History of polypharmacy *                                                        | 0.1251  | 0.0003 |
| 36 | History of Bipolar Disorder - Manic Episode-Stage 2 *                            | 0.4806  | 0.0162 |
| 37 | History of Depression-Stage 1 or 2 *                                             | 0.4028  | <.0001 |
| 38 | History of Drug Abuse, Dependence, Intoxication: Alcohol-Stage 1<br>*            | 0.3627  | 0.009  |
| 39 | History of Drug Abuse, Dependence, Intoxication: Alcohol-Stage 2<br>or 3 *       | 0.6949  | <.0001 |
| 40 | History of Chronic Obstructive Pulmonary Disease-Stage 1 or 2 *                  | 0.3625  | <.0001 |
| 41 | History of Chronic Obstructive Pulmonary Disease-Stage 3 *                       | 0.9574  | <.0001 |
| 42 | History of Neoplasm, Malignant: Lungs, Bronchi, or Mediastinum-<br>Stage 1 *     | 0.1444  | 0.4290 |
| 43 |                                                                                  |         |        |
| 44 |                                                                                  |         |        |
| 45 |                                                                                  |         |        |
| 46 |                                                                                  |         |        |
| 47 |                                                                                  |         |        |
| 48 |                                                                                  |         |        |
| 49 |                                                                                  |         |        |
| 50 |                                                                                  |         |        |
| 51 |                                                                                  |         |        |
| 52 |                                                                                  |         |        |
| 53 |                                                                                  |         |        |
| 54 |                                                                                  |         |        |
| 55 |                                                                                  |         |        |
| 56 |                                                                                  |         |        |
| 57 |                                                                                  |         |        |
| 58 |                                                                                  |         |        |
| 59 |                                                                                  |         |        |
| 60 |                                                                                  |         |        |

|    |                                                                 |         |        |
|----|-----------------------------------------------------------------|---------|--------|
| 1  |                                                                 |         |        |
| 2  |                                                                 |         |        |
| 3  | History of Neoplasm, Malignant: Lungs, Bronchi, or Mediastinum- | 0.3890  | 0.3220 |
| 4  | Stage 2 *                                                       |         |        |
| 5  | History of Neoplasm, Malignant: Lungs, Bronchi, or Mediastinum- | 0.7587  | 0.0080 |
| 6  | Stage 3 *                                                       |         |        |
| 7  | History of Pneumonia: Bacterial-Stage 2 *                       | -0.9199 | 0.0638 |
| 8  | History of Pneumonia: Bacterial-Stage 3 *                       | 0.4583  | 0.0128 |
| 9  | History of Neoplasm, Malignant: Melanoma-Stage 2 *              | 0.2292  | 0.4962 |
| 10 | History of Neoplasm, Malignant: Melanoma-Stage 3 *              | 0.6301  | 0.2916 |
| 11 | History of Oral Anti-coagulants *                               | 0.0666  | 0.3850 |
| 12 | History of Other Cardiovascular drugs *                         | 0.0303  | 0.4200 |
| 13 | History of Statins *                                            | 0.0592  | 0.1378 |
| 14 | Immunologic Disease (from any data source)                      | 0.2942  | 0.1479 |
| 15 | Male Genital System (from any data source)                      | -0.1980 | 0.0015 |
| 16 | Musculoskeletal Disease (from any data source)                  | -0.3422 | 0.0208 |
| 17 | Neurologic Disease (from any data source)                       | 0.2313  | 0.1007 |
| 18 | Hospitalization                                                 | 0.2053  | 0.0038 |
| 19 | Number of hospitalizations                                      | 0.0291  | 0.2995 |
| 20 | Polypharmacy                                                    | 0.2601  | <.0001 |
| 21 | Psychological Disease (from any data source)                    | 0.1041  | 0.0984 |
| 22 | Respiratory Disease (from any data source)                      | -0.1691 | 0.2366 |
| 23 | Cancer (from hospital data)                                     | 0.2023  | 0.3581 |
| 24 | Cardiovascular Disease (from hospital data)                     | -0.0893 | 0.3710 |
| 25 | Hepatobiliary (from hospital data)                              | -0.6082 | <.0001 |
| 26 | Musculoskeletal Disease (from hospital data)                    | -0.4016 | 0.0016 |
| 27 | Neurologic Disease (from hospital data)                         | -0.6060 | 0.0072 |
| 28 | Psychological Disease (from hospital data)                      | -0.2465 | 0.1059 |
| 29 | Respiratory Disease (from hospital data)                        | -0.2243 | 0.1884 |
| 30 | Skin Disease (from hospital data)                               | -0.5825 | 0.2155 |
| 31 | Skin Disease (from any data source)                             | 0.6403  | 0.1830 |
| 32 | Any of the other 9 Cardiovascular drugs                         | 0.0866  | 0.1859 |
| 33 |                                                                 |         |        |
| 34 |                                                                 |         |        |
| 35 |                                                                 |         |        |
| 36 |                                                                 |         |        |
| 37 |                                                                 |         |        |
| 38 |                                                                 |         |        |
| 39 |                                                                 |         |        |
| 40 |                                                                 |         |        |
| 41 |                                                                 |         |        |
| 42 |                                                                 |         |        |
| 43 |                                                                 |         |        |
| 44 |                                                                 |         |        |
| 45 |                                                                 |         |        |
| 46 |                                                                 |         |        |
| 47 |                                                                 |         |        |
| 48 |                                                                 |         |        |
| 49 |                                                                 |         |        |
| 50 |                                                                 |         |        |
| 51 |                                                                 |         |        |
| 52 |                                                                 |         |        |
| 53 |                                                                 |         |        |
| 54 |                                                                 |         |        |
| 55 |                                                                 |         |        |
| 56 |                                                                 |         |        |
| 57 |                                                                 |         |        |
| 58 |                                                                 |         |        |
| 59 |                                                                 |         |        |
| 60 |                                                                 |         |        |

### Females 65-74

| Variable                                                      | Coefficient | p-value |
|---------------------------------------------------------------|-------------|---------|
| Intercept                                                     | -4.5504     | <.0001  |
| Number of Chronic Conditions (from any data source)=1         | 0.3294      | 0.0005  |
| Number of Chronic Conditions (from any data source)=2         | 0.7012      | <.0001  |
| Number of Chronic Conditions (from any data source)=3         | 1.0162      | <.0001  |
| Number of Chronic Conditions (from any data source)=4         | 1.2243      | <.0001  |
| Number of Chronic Conditions (from any data source)=5         | 1.3625      | <.0001  |
| Number of Chronic Conditions (from any data source)=6 or more | 1.5014      | <.0001  |
| Number of Chronic Conditions (from hospital data)=1           | 0.3904      | <.0001  |
| Number of Chronic Conditions (from hospital data)=2           | 0.4301      | <.0001  |
| Number of Chronic Conditions (from hospital data)=3           | 0.4970      | <.0001  |

|    |                                                                  |          |        |
|----|------------------------------------------------------------------|----------|--------|
| 1  |                                                                  |          |        |
| 2  |                                                                  |          |        |
| 3  | Number of Chronic Conditions (from hospital data)=4 or more      | 0.5908   | <.0001 |
| 4  | Number of Chronic Conditions (from home health prescription)=1   | 0.4758   | <.0001 |
| 5  | or more                                                          |          |        |
| 6  |                                                                  |          |        |
| 7  | Number of Chronic Conditions (from drug prescriptions)=1         | -0.1393  | 0.1297 |
| 8  | Number of Chronic Conditions (from drug prescriptions)=2         | -0.3041  | 0.0058 |
| 9  | Number of Chronic Conditions (from drug prescriptions)=3         | -0.3950  | 0.0024 |
| 10 | Number of Chronic Conditions (from drug prescriptions)=4         | -0.4051  | 0.0076 |
| 11 | Number of Chronic Conditions (from drug prescriptions)=5 or more | -0.4003  | 0.0256 |
| 12 | Age on 12 /31/ 2012                                              | -0.00012 | <.0001 |
| 13 | Cancer (from home health prescription)                           | 0.6069   | <.0001 |
| 14 | Cardiovascular Disease (from home health prescription)           | -0.2636  | 0.0301 |
| 15 | Blood Diseases (from home health prescription)                   | 0.6193   | 0.1479 |
| 16 | Neurologic Diseases (from home health prescription)              | 0.4376   | 0.0016 |
| 17 | Mental Disorders (from home health prescription)                 | -0.2879  | 0.1224 |
| 18 | Cancer (chemo or radiation )                                     | 0.1589   | 0.0714 |
| 19 | Aortic Stenosis-Stage 1                                          | 0.5120   | 0.0026 |
| 20 | Cardiomyopathies-Stage 3                                         | 0.8973   | 0.0003 |
| 21 | Congestive Heart Failure-Stage3                                  | 0.3086   | 0.0103 |
| 22 | Coronary Artery Disease-Stage 1                                  | -0.1015  | 0.2148 |
| 23 | Coronary Artery Disease-Stage 2                                  | 0.4617   | 0.0005 |
| 24 | Coronary Artery Disease-Stage 3                                  | 0.2471   | 0.0565 |
| 25 | Essential Hypertension-Stage 1                                   | -0.1363  | 0.0191 |
| 26 | Essential Hypertension-Stage 3                                   | 0.2124   | 0.0429 |
| 27 | Mitral Stenosis-Stage 1                                          | -0.4732  | 0.0120 |
| 28 | Thrombophlebitis-Stage 2 or 3                                    | 0.7060   | <.0001 |
| 29 | Tibial/Iliac/Femoral/Popliteal Artery Disease-Stage 1            | 0.3844   | 0.0228 |
| 30 | Tibial/Iliac/Femoral/Popliteal Artery Disease-Stage 2 or 3       | 0.8107   | 0.0004 |
| 31 | Diabetes Mellitus Type 1 or Type 2-Stage 3                       | -0.6668  | 0.0022 |
| 32 | Crohns Disease-Stage 2 or 3                                      | 0.7852   | 0.1300 |
| 33 | Hernia, Hiatal or Reflux Esophagitis-Stage 1                     | 0.1799   | 0.1780 |
| 34 | Neoplasm, Malignant: Stomach-Stage 3                             | 0.4943   | 0.1142 |
| 35 | Neoplasm, Malignant: Bladder, Urinary-Stage 3                    | 0.8348   | 0.0780 |
| 36 | Neoplasm, Malignant: Breast, Female-Stage 1                      | -0.7289  | <.0001 |
| 37 | Neoplasm, Malignant: Breast, Female-Stage 3                      | -0.2375  | 0.1392 |
| 38 | Anemia: Aplastic, Acquired-Stage 2 or 3                          | 0.2640   | 0.1999 |
| 39 | Neoplasm, Malignant Hematologic-Stage 1                          | 0.2313   | 0.1024 |
| 40 | Neoplasm, Malignant Hematologic-Stage 3                          | -1.0860  | 0.0017 |
| 41 | Cirrhosis of the Liver-Stage 2 or 3                              | 0.6134   | <.0001 |
| 42 | Neoplasm, Malignant: Pancreas-Stage 1                            | 0.7125   | 0.0116 |
| 43 | Neoplasm, Malignant: Pancreas-Stage 2 or 3                       | 1.7605   | <.0001 |
| 44 | Rheumatic Fever- Stage 2                                         | 0.3447   | 0.0706 |
| 45 | Cerebrovascular Disease-Stage 3                                  | -0.6890  | 0.0007 |
| 46 | Dementia: Primary Degenerative (Alzheimer or Pick)-Stage 2 or 3  | 0.3887   | 0.2397 |
| 47 | Bipolar Disorder - Major Depressive Episode-Stage 2 or 3         | -0.7551  | 0.1418 |
| 48 |                                                                  |          |        |
| 49 |                                                                  |          |        |
| 50 |                                                                  |          |        |
| 51 |                                                                  |          |        |
| 52 |                                                                  |          |        |
| 53 |                                                                  |          |        |
| 54 |                                                                  |          |        |
| 55 |                                                                  |          |        |
| 56 |                                                                  |          |        |
| 57 |                                                                  |          |        |
| 58 |                                                                  |          |        |
| 59 |                                                                  |          |        |
| 60 |                                                                  |          |        |

|    |                                                             |         |        |
|----|-------------------------------------------------------------|---------|--------|
| 1  |                                                             |         |        |
| 2  |                                                             |         |        |
| 3  | Bipolar Disorder - Manic Episode-Stage 2                    | 0.6386  | 0.0329 |
| 4  | Depression-Stage 1 or 2                                     | -0.1537 | 0.1428 |
| 5  | Drug Abuse, Dependence, Intoxication: Alcohol-Stage 1       | 1.4878  | 0.0036 |
| 6  | Chronic Obstructive Pulmonary Disease-Stage 1 or 2          | 0.1325  | 0.0980 |
| 7  | Chronic Obstructive Pulmonary Disease-Stage 3               | 0.5302  | 0.0063 |
| 8  | Neoplasm, Malignant: Lungs, Bronchi, or Mediastinum-Stage 1 | 0.5790  | 0.0005 |
| 9  | Neoplasm, Malignant: Lungs, Bronchi, or Mediastinum-Stage 2 | 0.6907  | 0.0477 |
| 10 | Neoplasm, Malignant: Lungs, Bronchi, or Mediastinum-Stage 3 | 0.7408  | 0.0003 |
| 11 | Any Cancer - Stage 1 (from hospital data)                   | 0.3101  | <.0001 |
| 12 | Any Cancer - Stage 3 (from hospital data)                   | 1.2060  | <.0001 |
| 13 | Any Endocrine Disease - Stage 3 (from hospital data)        | 0.4493  | 0.0062 |
| 14 | Any Eye Disease - All stages (from hospital data)           | -0.1582 | 0.1255 |
| 15 | Any Genitourinary Disease - Stage 2 (from hospital data)    | 0.3230  | 0.0655 |
| 16 | Any Genitourinary Disease - Stage 3 (from hospital data)    | -0.4009 | 0.1324 |
| 17 | Any Gynecologic Disease - Stage 2 or 3 (from hospital data) | -0.4173 | 0.0548 |
| 18 | Any Hepatobiliary Disease - Stage 1 (from hospital data)    | -0.3374 | 0.0002 |
| 19 | Any Hepatobiliary Disease - Stage 3 (from hospital data)    | 0.3881  | 0.1255 |
| 20 | Any Immunologic Disease - All stages (from hospital data)   | -0.5745 | 0.1396 |
| 21 | Any Infectious Disease - Stage 3 (from hospital data)       | 0.5105  | 0.0511 |
| 22 | Any Neurologic Disease - Stage 3 (from hospital data)       | 0.8526  | <.0001 |
| 23 | Any Psychologic Disease - Stage 2 (from hospital data)      | 0.3067  | 0.0376 |
| 24 | Any Psychologic Disease - Stage 3 (from hospital data)      | 0.6691  | 0.0261 |
| 25 | Any Respiratory Disease - Stage 3 (from hospital data)      | 0.1787  | 0.1601 |
| 26 | Any Skin Disease - Stage 1 (from hospital data)             | -0.2893 | 0.0063 |
| 27 | Cancer (from any data source)                               | -0.3239 | <.0001 |
| 28 | Cancer (from drug prescriptions)                            | 0.3190  | <.0001 |
| 29 | Cardiovascular Disease (from drug prescriptions)            | -0.3086 | <.0001 |
| 30 | Genitourinary Disease (from drug prescriptions)             | 0.6302  | <.0001 |
| 31 | Hematologic Disease (from drug prescriptions)               | 0.3673  | <.0001 |
| 32 | Hepatobiliary Disease (from drug prescriptions)             | 0.6321  | 0.0005 |
| 33 | Musculoskeletal Disease (from drug prescriptions)           | 0.1877  | 0.0283 |
| 34 | Respiratory Disease (from drug prescriptions)               | 0.1731  | <.0001 |
| 35 | Oral anti-coagulants                                        | 0.2036  | 0.0012 |
| 36 | Statins                                                     | -0.1126 | <.0001 |
| 37 | ACE/ARB                                                     | -0.1348 | <.0001 |
| 38 | Anti-platelets                                              | 0.1104  | 0.0002 |
| 39 | Anti-arrhythmics                                            | 0.0912  | 0.0986 |
| 40 | Digitalis glycosides                                        | 0.2082  | 0.0046 |
| 41 | Nitrates                                                    | 0.2180  | <.0001 |
| 42 | Diuretics                                                   | 0.0387  | 0.2255 |
| 43 | Endocrine Disease (from any data source)                    | -0.1114 | 0.0002 |
| 44 | Ear,Nose,Throat Disease (from any data source)              | -0.4077 | 0.0494 |
| 45 | Number of ER visits labeled 'Yellow'                        | -0.3525 | <.0001 |
| 46 | Total number of ER visits                                   | 0.5514  | <.0001 |
| 47 |                                                             |         |        |
| 48 |                                                             |         |        |
| 49 |                                                             |         |        |
| 50 |                                                             |         |        |
| 51 |                                                             |         |        |
| 52 |                                                             |         |        |
| 53 |                                                             |         |        |
| 54 |                                                             |         |        |
| 55 |                                                             |         |        |
| 56 |                                                             |         |        |
| 57 |                                                             |         |        |
| 58 |                                                             |         |        |
| 59 |                                                             |         |        |
| 60 |                                                             |         |        |

|    |                                                                                  |         |        |
|----|----------------------------------------------------------------------------------|---------|--------|
| 1  |                                                                                  |         |        |
| 2  |                                                                                  |         |        |
| 3  | Eye Disease (from any data source)                                               | -0.2411 | <.0001 |
| 4  | Gastrointestinal Disease (from any data source)                                  | -0.0917 | 0.0025 |
| 5  | Gynecologic Disease (from any data source)                                       | -0.4752 | <.0001 |
| 6  | History of Cancer (from drug prescriptions) *                                    | 0.1368  | 0.0038 |
| 7  | History of Neurological Disease (from drug prescriptions) *                      | 0.1374  | <.0001 |
| 8  | History of Aortic Stenosis-Stage 3 *                                             | 0.2156  | 0.1868 |
| 9  | History of Arrhythmias-Stage 2 *                                                 | 0.1567  | 0.0059 |
| 10 | History of Cardiomyopathies-Stage 2 *                                            | 0.4598  | 0.0002 |
| 11 | History of Congestive Heart Failure-Stage 3 *                                    | 0.2601  | 0.0033 |
| 12 | History of Coronary Artery Disease-Stage 1 *                                     | 0.1550  | 0.0040 |
| 13 | History of Coronary Artery Disease-Stage 2 *                                     | 0.1778  | 0.0271 |
| 14 | History of Coronary Artery Disease-Stage 3 *                                     | 0.2409  | 0.0019 |
| 15 | History of Essential Hypertension-Stage 2 *                                      | 0.1060  | 0.0526 |
| 16 | History of Essential Hypertension-Stage 3 *                                      | 0.1504  | 0.0375 |
| 17 | History of Mitral Stenosis-Stage 2 *                                             | -0.2678 | 0.0937 |
| 18 | History of Mitral Stenosis-Stage 3 *                                             | 0.3696  | 0.0337 |
| 19 | History of Diabetes Mellitus Type 1 or Type 2-Stage 1 *                          | 0.2128  | <.0001 |
| 20 | History of Diabetes Mellitus Type 1 or Type 2-Stage 2 *                          | 0.3147  | <.0001 |
| 21 | History of Diabetes Mellitus Type 1 or Type 2-Stage 3 *                          | 0.4937  | <.0001 |
| 22 | History of Crohns Disease-Stage 2 or 3 *                                         | 0.5581  | 0.0954 |
| 23 | History of Neoplasm, Malignant: Colon and Rectum-Stage 3 *                       | 0.4016  | 0.0044 |
| 24 | History of Neoplasm, Malignant: Stomach-Stage 3 *                                | 0.4353  | 0.1847 |
| 25 | History of Calculus of the Urinary Tract-Stage 1 *                               | 0.2185  | 0.0607 |
| 26 | History of Neoplasm, Malignant: Kidneys-Stage 3 *                                | -0.7174 | 0.1125 |
| 27 | History of Renal Failure-Stage 2 or 3 *                                          | 0.4347  | <.0001 |
| 28 | History of Neoplasm, Malignant: Breast, Female-Stage 1 *                         | -0.1897 | 0.0064 |
| 29 | History of Neoplasm, Malignant: Breast, Female-Stage 3 *                         | 0.2713  | 0.0494 |
| 30 | History of Neoplasm, Malignant: Ovaries-Stage 1 *                                | 0.4490  | 0.0239 |
| 31 | History of Neoplasm, Malignant Hematologic-Stage 2 *                             | 0.5429  | 0.0348 |
| 32 | History of Cholecystitis and Cholelithiasis-Stage 2 *                            | 0.1929  | 0.0880 |
| 33 | History of Cirrhosis of the Liver-Stage 2 or 3 *                                 | 0.3420  | <.0001 |
| 34 | History of Progressive Systemic Sclerosis-Stage 2 or 3 *                         | 0.7431  | <.0001 |
| 35 | History of Cerebrovascular Disease-Stage 1 *                                     | 0.2276  | 0.0043 |
| 36 | History of Cerebrovascular Disease-Stage 3 *                                     | 0.1967  | 0.0029 |
| 37 | History of Dementia: Primary Degenerative (Alzheimer or Pick)-<br>Stage 1 *      | 0.4871  | <.0001 |
| 38 | History of Dementia: Primary Degenerative (Alzheimer or Pick)-<br>Stage 2 or 3 * | 0.7255  | 0.0080 |
| 39 | History of Obesity-Stage 2 or 3 *                                                | 0.1359  | 0.0870 |
| 40 | History of polypharmacy *                                                        | 0.1622  | <.0001 |
| 41 | History of Bipolar Disorder - Major Depressive Episode-Stage 2 or<br>3 *         | 0.6969  | 0.0010 |
| 42 | History of Depression-Stage 1 or 2 *                                             | 0.1646  | 0.0034 |
| 43 | History of Drug Abuse, Dependence, Intoxication: Alcohol-Stage 1<br>*            | 0.8459  | 0.0008 |
| 44 |                                                                                  |         |        |
| 45 |                                                                                  |         |        |
| 46 |                                                                                  |         |        |
| 47 |                                                                                  |         |        |
| 48 |                                                                                  |         |        |
| 49 |                                                                                  |         |        |
| 50 |                                                                                  |         |        |
| 51 |                                                                                  |         |        |
| 52 |                                                                                  |         |        |
| 53 |                                                                                  |         |        |
| 54 |                                                                                  |         |        |
| 55 |                                                                                  |         |        |
| 56 |                                                                                  |         |        |
| 57 |                                                                                  |         |        |
| 58 |                                                                                  |         |        |
| 59 |                                                                                  |         |        |
| 60 |                                                                                  |         |        |

|                                                                          |         |        |
|--------------------------------------------------------------------------|---------|--------|
| History of Drug Abuse, Dependence, Intoxication: Alcohol-Stage 2 or 3 *  | 0.6589  | <.0001 |
| History of Chronic Obstructive Pulmonary Disease-Stage 1 or 2 *          | 0.4628  | <.0001 |
| History of Chronic Obstructive Pulmonary Disease-Stage 3 *               | 0.8534  | <.0001 |
| History of Neoplasm, Malignant: Lungs, Bronchi, or Mediastinum-Stage 1 * | 0.2386  | 0.1126 |
| History of Neoplasm, Malignant: Lungs, Bronchi, or Mediastinum-Stage 2 * | 0.6212  | 0.0971 |
| History of Pneumonia: Bacterial-Stage 2 *                                | 0.4624  | 0.1267 |
| History of Pneumonia: Bacterial-Stage 3 *                                | 0.4924  | 0.0003 |
| History of Neoplasm, Malignant: Melanoma-Stage 3 *                       | 0.8606  | 0.1231 |
| History of Oral Anti-coagulants *                                        | 0.2508  | <.0001 |
| History of Other Cardiovascular drugs *                                  | 0.1002  | 0.0015 |
| Musculoskeletal Disease (from any data source)                           | -0.3863 | <.0001 |
| Hospitalization                                                          | 0.2562  | <.0001 |
| Number of hospitalizations                                               | -0.0651 | 0.0068 |
| Polypharmacy                                                             | 0.2370  | <.0001 |
| Cardiovascular Disease (from hospital data)                              | -0.0957 | 0.1172 |
| Musculoskeletal Disease (from hospital data)                             | -0.2090 | 0.0016 |
| Any of the other 9 Cardiovascular drugs                                  | 0.0806  | 0.1274 |
| Number of the other 9 Cardiovascular drugs                               | 0.0425  | 0.0129 |

### Males 65-74

| Variable                                                               | Coefficient | p-value |
|------------------------------------------------------------------------|-------------|---------|
| Intercept                                                              | -4.0290     | <.0001  |
| Number of Chronic Conditions (from any data source)=1                  | 0.3090      | <.0001  |
| Number of Chronic Conditions (from any data source)=2                  | 0.4055      | <.0001  |
| Number of Chronic Conditions (from any data source)=3                  | 0.6026      | <.0001  |
| Number of Chronic Conditions (from any data source)=4                  | 0.7813      | <.0001  |
| Number of Chronic Conditions (from any data source)=5                  | 0.7088      | <.0001  |
| Number of Chronic Conditions (from any data source)=6 or more          | 0.8178      | <.0001  |
| Number of Chronic Conditions (from hospital data)=1                    | 0.2460      | <.0001  |
| Number of Chronic Conditions (from hospital data)=2                    | 0.3676      | <.0001  |
| Number of Chronic Conditions (from hospital data)=3                    | 0.3746      | <.0001  |
| Number of Chronic Conditions (from hospital data)=4 or more            | 0.4616      | <.0001  |
| Number of Chronic Conditions (from home health prescription)=1 or more | 0.7247      | <.0001  |
| Number of Chronic Conditions (from drug prescriptions)=1               | -0.0302     | 0.6751  |
| Number of Chronic Conditions (from drug prescriptions)=2               | 0.0804      | 0.3543  |
| Number of Chronic Conditions (from drug prescriptions)=3               | 0.0770      | 0.4505  |
| Number of Chronic Conditions (from drug prescriptions)=4               | 0.1604      | 0.1774  |
| Number of Chronic Conditions (from drug prescriptions)=5 or more       | 0.3823      | 0.0066  |
| Age on 12 /31/ 2012                                                    | -0.0001     | <.0001  |



|    |                                                             |         |        |
|----|-------------------------------------------------------------|---------|--------|
| 1  |                                                             |         |        |
| 2  |                                                             |         |        |
| 3  | Cardiovascular Disease (from home health prescription)      | -0.2088 | 0.0342 |
| 4  | Gastrointestinal Disease (from home health prescription)    | -0.9964 | 0.0117 |
| 5  | Cancer (chemo or radiation )                                | 0.4296  | <.0001 |
| 6  | Cardiomyopathies-Stage 3                                    | 0.5047  | 0.0007 |
| 7  | Coronary Artery Disease-Stage 2                             | 0.2966  | <.0001 |
| 8  | Coronary Artery Disease-Stage 3                             | 0.2001  | 0.0086 |
| 9  | Tibial/Iliac/Femoral/Popliteal Artery Disease-Stage 1       | 0.2752  | 0.0019 |
| 10 | Tibial/Iliac/Femoral/Popliteal Artery Disease-Stage 2 or 3  | 0.3313  | 0.0330 |
| 11 | Hyperthyroidism-Stage 1                                     | -0.8506 | 0.0059 |
| 12 | Hyperthyroidism-Stage 2 or 3                                | -0.8443 | 0.0397 |
| 13 | Hypothyroidism-Stage 1                                      | -0.4005 | 0.0102 |
| 14 | Diverticular Disease-Stage 1                                | 0.3805  | 0.0034 |
| 15 | Gastritis-Stage 1                                           | 0.2944  | 0.0367 |
| 16 | Hernia, Hiatal or Reflux Esophagitis-Stage 1                | 0.3404  | 0.0214 |
| 17 | Neoplasm, Malignant: Stomach-Stage 3                        | 0.6357  | 0.0021 |
| 18 | Neoplasm, Malignant: Bladder, Urinary-Stage 1               | -0.3858 | 0.0003 |
| 19 | Neoplasm, Malignant: Bladder, Urinary-Stage 3               | 1.0573  | 0.0003 |
| 20 | Renal Failure-Stage 2 or 3                                  | 0.2462  | 0.0001 |
| 21 | Cholecystitis and Cholelithiasis-Stage 2                    | 0.8383  | 0.0010 |
| 22 | Cirrhosis of the Liver-Stage 2 or 3                         | 0.5557  | <.0001 |
| 23 | Neoplasm, Malignant: Pancreas-Stage 1                       | 0.8289  | 0.0004 |
| 24 | Neoplasm, Malignant: Pancreas-Stage 2 or 3                  | 1.0295  | 0.0026 |
| 25 | Rheumatic Fever- Stage 2                                    | 0.4941  | 0.0138 |
| 26 | Rheumatic Fever- Stage 3                                    | 0.9219  | 0.0348 |
| 27 | Neoplasm, Malignant: Prostate-Stage 2                       | -0.5899 | <.0001 |
| 28 | Cerebrovascular Disease-Stage 1                             | 0.2014  | 0.0319 |
| 29 | Cerebrovascular Disease-Stage 3                             | -0.3785 | 0.0234 |
| 30 | Drug Abuse, Dependence, Intoxication: Alcohol-Stage 2 or 3  | 0.2581  | 0.1704 |
| 31 | Neoplasm, Malignant: Lungs, Bronchi, or Mediastinum-Stage 1 | 0.6623  | <.0001 |
| 32 | Neoplasm, Malignant: Lungs, Bronchi, or Mediastinum-Stage 2 | 1.0595  | <.0001 |
| 33 | Neoplasm, Malignant: Lungs, Bronchi, or Mediastinum-Stage 3 | 0.9074  | <.0001 |
| 34 | Pulmonary Embolism-Stage 3                                  | 0.5962  | 0.0059 |
| 35 | Any Cancer - Stage 1 (from hospital data)                   | 0.1424  | 0.1477 |
| 36 | Any Cancer - Stage 3 (from hospital data)                   | 0.9400  | <.0001 |
| 37 | Any Cardiovascular Disease - Stage 1 (from hospital data)   | -0.0869 | 0.0242 |
| 38 | Any Ear,Nose,Throat Disease - Stage 1 (from hospital data)  | -0.4741 | 0.0100 |
| 39 | Any Gastrointestinal Disease - Stage 1 (from hospital data) | -0.2854 | <.0001 |
| 40 | Any Hepatobiliary Disease - Stage 2 (from hospital data)    | -0.5419 | 0.0149 |
| 41 | Any Hepatobiliary Disease - Stage 3 (from hospital data)    | 0.4751  | 0.0179 |
| 42 | Any Immunologic Disease - All stages (from hospital data)   | 0.6987  | 0.0029 |
| 43 | Any Musculoskeletal Disease - Stage 1 (from hospital data)  | -0.2629 | <.0001 |
| 44 | Any Neurologic Disease - Stage 3 (from hospital data)       | 0.5546  | 0.0004 |
| 45 | Any Psychologic Disease - Stage 1 (from hospital data)      | -0.4107 | 0.0146 |
| 46 | Any Psychologic Disease - Stage 3 (from hospital data)      | -0.7275 | 0.0035 |
| 47 |                                                             |         |        |
| 48 |                                                             |         |        |
| 49 |                                                             |         |        |
| 50 |                                                             |         |        |
| 51 |                                                             |         |        |
| 52 |                                                             |         |        |
| 53 |                                                             |         |        |
| 54 |                                                             |         |        |
| 55 |                                                             |         |        |
| 56 |                                                             |         |        |
| 57 |                                                             |         |        |
| 58 |                                                             |         |        |
| 59 |                                                             |         |        |
| 60 |                                                             |         |        |

|    |                                                                             |         |        |
|----|-----------------------------------------------------------------------------|---------|--------|
| 1  |                                                                             |         |        |
| 2  |                                                                             |         |        |
| 3  | Any Respiratory Disease - Stage 3 (from hospital data)                      | 0.6359  | <.0001 |
| 4  | Cancer (from any data source)                                               | -0.3827 | <.0001 |
| 5  | Cancer (from drug prescriptions)                                            | 0.2794  | <.0001 |
| 6  | Cardiovascular Disease (from drug prescriptions)                            | -0.3439 | <.0001 |
| 7  | Eye Disease (from drug prescriptions)                                       | -0.3279 | <.0001 |
| 8  | Genitourinary Disease (from drug prescriptions)                             | 0.2042  | 0.0754 |
| 9  | Hepatobiliary Disease (from drug prescriptions)                             | 0.5858  | 0.0002 |
| 10 | Respiratory Disease (from drug prescriptions)                               | 0.1468  | <.0001 |
| 11 | Drug-Drug interactions                                                      | 0.1473  | 0.0128 |
| 12 | Oral anti-coagulants                                                        | 0.1161  | 0.0182 |
| 13 | Statins                                                                     | -0.1331 | <.0001 |
| 14 | Beta-blockers                                                               | 0.0499  | 0.0248 |
| 15 | ACE/ARB                                                                     | -0.0997 | <.0001 |
| 16 | Anti-platelets                                                              | 0.1992  | <.0001 |
| 17 | Anti-arrhythmics                                                            | 0.1064  | 0.0130 |
| 18 | Digitalis glycosides                                                        | 0.3471  | <.0001 |
| 19 | Nitrates                                                                    | 0.3349  | <.0001 |
| 20 | Diuretics                                                                   | 0.1464  | <.0001 |
| 21 | Total number of ER visits                                                   | 0.1632  | <.0001 |
| 22 | Gastrointestinal Disease (from any data source)                             | -0.1029 | <.0001 |
| 23 | Genitourinary Disease (from any data source)                                | 0.3139  | 0.0021 |
| 24 | History of Cancer (from drug prescriptions) *                               | 0.1477  | 0.0020 |
| 25 | History of Neurological Disease (from drug prescriptions) *                 | 0.1240  | 0.0001 |
| 26 | History of Cardiomyopathies-Stage 2 *                                       | 0.3116  | <.0001 |
| 27 | History of Cardiomyopathies-Stage 3 *                                       | 0.4397  | <.0001 |
| 28 | History of Congestive Heart Failure-Stage 3 *                               | 0.3374  | <.0001 |
| 29 | History of Coronary Artery Disease-Stage 1 *                                | 0.2568  | <.0001 |
| 30 | History of Essential Hypertension-Stage 2 *                                 | 0.1079  | 0.0140 |
| 31 | History of Diabetes Mellitus Type 1 or Type 2-Stage 1 *                     | 0.1006  | 0.0031 |
| 32 | History of Diabetes Mellitus Type 1 or Type 2-Stage 2 *                     | 0.1970  | 0.0001 |
| 33 | History of Neoplasm, Malignant: Colon and Rectum-Stage 3 *                  | 0.3887  | 0.0005 |
| 34 | History of Renal Failure-Stage 2 or 3 *                                     | 0.3301  | <.0001 |
| 35 | History of Cholecystitis and Cholelithiasis-Stage 1 *                       | 0.2586  | 0.0009 |
| 36 | History of Cirrhosis of the Liver-Stage 2 or 3 *                            | 0.3021  | <.0001 |
| 37 | History of Neoplasm, Malignant: Prostate-Stage 3 *                          | 0.3601  | 0.0252 |
| 38 | History of Cerebrovascular Disease-Stage 1 *                                | 0.1414  | 0.0309 |
| 39 | History of Cerebrovascular Disease-Stage 3 *                                | 0.2819  | <.0001 |
| 40 | History of Dementia: Primary Degenerative (Alzheimer or Pick)-<br>Stage 1 * | 0.6145  | <.0001 |
| 41 | History of polypharmacy *                                                   | 0.1051  | <.0001 |
| 42 | History of Bipolar Disorder - Manic Episode-Stage 1 *                       | 0.6800  | 0.0265 |
| 43 | History of Drug Abuse, Dependence, Intoxication: Alcohol-Stage 1<br>*       | 0.3941  | 0.0071 |
| 44 | History of Drug Abuse, Dependence, Intoxication: Alcohol-Stage 2<br>or 3 *  | 0.4235  | <.0001 |
| 45 |                                                                             |         |        |
| 46 |                                                                             |         |        |
| 47 |                                                                             |         |        |
| 48 |                                                                             |         |        |
| 49 |                                                                             |         |        |
| 50 |                                                                             |         |        |
| 51 |                                                                             |         |        |
| 52 |                                                                             |         |        |
| 53 |                                                                             |         |        |
| 54 |                                                                             |         |        |
| 55 |                                                                             |         |        |
| 56 |                                                                             |         |        |
| 57 |                                                                             |         |        |
| 58 |                                                                             |         |        |
| 59 |                                                                             |         |        |
| 60 |                                                                             |         |        |

|                                                                 |         |        |
|-----------------------------------------------------------------|---------|--------|
| History of Chronic Obstructive Pulmonary Disease-Stage 1 or 2 * | 0.3669  | <.0001 |
| History of Chronic Obstructive Pulmonary Disease-Stage 3 *      | 0.7646  | <.0001 |
| History of Pneumonia: Bacterial-Stage 3 *                       | 0.3809  | 0.0002 |
| History of Oral Anti-coagulants *                               | 0.1253  | 0.0059 |
| History of Other Cardiovascular drugs *                         | 0.1019  | 0.0003 |
| Male Genital System (from any data source)                      | -0.3918 | <.0001 |
| Musculoskeletal Disease (from any data source)                  | -0.1502 | <.0001 |
| Hospitalization                                                 | 0.1762  | 0.0003 |
| Number of hospitalizations                                      | 0.0176  | 0.3845 |
| Polypharmacy                                                    | 0.2522  | <.0001 |
| Cancer (from hospital data)                                     | 0.3120  | 0.0130 |
| Genitourinary Disease (from hospital data)                      | -0.4713 | <.0001 |
| Psychological Disease (from hospital data)                      | 0.5748  | 0.0003 |

### Females 75-84

| Variable                                                               | Coefficient | p-value |
|------------------------------------------------------------------------|-------------|---------|
| Intercept                                                              | -2.1966     | 0.0983  |
| Number of Chronic Conditions (from any data source)=1                  | 0.3204      | <.0001  |
| Number of Chronic Conditions (from any data source)=2                  | 0.5216      | <.0001  |
| Number of Chronic Conditions (from any data source)=3                  | 0.6879      | <.0001  |
| Number of Chronic Conditions (from any data source)=4                  | 0.8108      | <.0001  |
| Number of Chronic Conditions (from any data source)=5                  | 0.8615      | <.0001  |
| Number of Chronic Conditions (from any data source)=6 or more          | 0.9003      | <.0001  |
| Number of Chronic Conditions (from hospital data)=1                    | 0.2734      | <.0001  |
| Number of Chronic Conditions (from hospital data)=2                    | 0.4760      | <.0001  |
| Number of Chronic Conditions (from hospital data)=3                    | 0.4602      | <.0001  |
| Number of Chronic Conditions (from hospital data)=4 or more            | 0.5605      | <.0001  |
| Number of Chronic Conditions (from home health prescription)=1         | 0.4539      | <.0001  |
| Number of Chronic Conditions (from home health prescription)=2 or more | 0.5024      | <.0001  |
| Number of Chronic Conditions (from drug prescriptions)=1               | -0.2927     | <.0001  |
| Number of Chronic Conditions (from drug prescriptions)=2               | -0.4346     | <.0001  |
| Number of Chronic Conditions (from drug prescriptions)=3               | -0.5230     | <.0001  |
| Number of Chronic Conditions (from drug prescriptions)=4               | -0.5943     | <.0001  |
| Number of Chronic Conditions (from drug prescriptions)=5 or more       | -0.6388     | <.0001  |
| Age on 12/ 31/ 2012                                                    | -0.0494     | 0.0537  |
| Cancer (from home health prescription)                                 | 0.5074      | <.0001  |
| Cardiovascular Disease (from home health prescription)                 | -0.1174     | 0.0117  |
| Respiratory Diseases (from home health prescription)                   | 0.4899      | <.0001  |
| Cancer (chemo or radiation )                                           | 0.3093      | 0.0003  |
| Genitourinary (dialysis)                                               | 0.3668      | 0.0018  |
| Aneurysm, Thoracic-all stages                                          | 0.4180      | 0.0286  |

|    |                                                                 |         |        |
|----|-----------------------------------------------------------------|---------|--------|
| 1  |                                                                 |         |        |
| 2  |                                                                 |         |        |
| 3  | Aortic Stenosis-Stage 1                                         | 0.2859  | 0.0055 |
| 4  | Arrhythmias-Stage 3                                             | -0.4014 | 0.0049 |
| 5  | Coronary Artery Disease-Stage 2                                 | 0.3630  | <.0001 |
| 6  | Essential Hypertension-Stage 3                                  | -0.1678 | 0.0129 |
| 7  | Mitral Stenosis-Stage 2                                         | -0.3215 | 0.0749 |
| 8  | Thrombophlebitis-Stage 1                                        | 0.3956  | 0.0024 |
| 9  | Thrombophlebitis-Stage 2 or 3                                   | -0.3711 | 0.0013 |
| 10 | Hyperthyroidism-Stage 1                                         | -0.3290 | 0.0847 |
| 11 | Crohn's Disease-Stage 1                                         | 0.7565  | 0.0329 |
| 12 | Functional Digestive Disorders-Stage 1                          | 0.2509  | 0.0124 |
| 13 | Gastritis-Stage 1                                               | 0.3782  | 0.0002 |
| 14 | Neoplasm, Malignant: Kidneys-Stage 3                            | -0.7235 | 0.1071 |
| 15 | Renal Failure-Stage 2 or 3                                      | 0.2070  | 0.0002 |
| 16 | Neoplasm, Malignant: Breast, Female-Stage 1                     | -0.3991 | 0.0001 |
| 17 | Neoplasm, Malignant: Breast, Female-Stage 3                     | -0.4149 | 0.0077 |
| 18 | Neoplasm, Malignant: Ovaries-Stage 1                            | 0.5296  | 0.0693 |
| 19 | Anemia: Aplastic, Acquired-Stage 2 or 3                         | 0.3538  | 0.0227 |
| 20 | Cirrhosis of the Liver-Stage 2 or 3                             | 0.6150  | <.0001 |
| 21 | Neoplasm, Malignant: Pancreas-Stage 1                           | 0.8098  | 0.0011 |
| 22 | Neoplasm, Malignant: Pancreas-Stage 2 or 3                      | 0.7321  | 0.0866 |
| 23 | Progressive Systemic Sclerosis-Stage 1                          | 0.5340  | 0.0203 |
| 24 | Cerebrovascular Disease-Stage 1                                 | 0.1406  | 0.0941 |
| 25 | Dementia: Primary Degenerative (Alzheimer or Pick)-Stage 1      | 0.3594  | <.0001 |
| 26 | Dementia: Primary Degenerative (Alzheimer or Pick)-Stage 2 or 3 | 0.2377  | 0.0716 |
| 27 | Bipolar Disorder - Manic Episode-Stage 1                        | -0.9145 | 0.1201 |
| 28 | Chronic Obstructive Pulmonary Disease-Stage 1 or 2              | 0.2567  | 0.0037 |
| 29 | Neoplasm, Malignant: Lungs, Bronchi, or Mediastinum-Stage 1     | 0.5431  | 0.0015 |
| 30 | Neoplasm, Malignant: Lungs, Bronchi, or Mediastinum-Stage 2     | 0.9029  | 0.0394 |
| 31 | Pneumonia: Bacterial-Stage 1                                    | 0.3367  | 0.0003 |
| 32 | Pneumonia: Bacterial-Stage 3                                    | -0.3613 | 0.0110 |
| 33 | Pulmonary Embolism-Stage 3                                      | -0.3302 | 0.0333 |
| 34 | Any Cancer - Stage 1 (from hospital data)                       | 0.2294  | 0.0003 |
| 35 | Any Cancer - Stage 2 (from hospital data)                       | 0.1477  | 0.1008 |
| 36 | Any Cancer - Stage 3 (from hospital data)                       | 1.3077  | <.0001 |
| 37 | Any Cardiovascular Disease - Stage 1 (from hospital data)       | -0.1001 | 0.0026 |
| 38 | Any Cardiovascular - Stage 3 (from hospital data)               | 0.3030  | <.0001 |
| 39 | Any Eye Disease - All stages (from hospital data)               | -0.1491 | 0.0443 |
| 40 | Any Gastrointestinal Disease - Stage 1 (from hospital data)     | -0.2093 | <.0001 |
| 41 | Any Hematologic Disease - Stage 3 (from hospital data)          | 0.4744  | 0.0174 |
| 42 | Any Musculoskeletal Disease - Stage 1 (from hospital data)      | -0.1645 | <.0001 |
| 43 | Any Neurologic Disease - Stage 1 (from hospital data)           | -0.1809 | 0.0076 |
| 44 | Any Neurologic Disease - Stage 3 (from hospital data)           | 0.3131  | <.0001 |
| 45 | Any Psychologic Disease - Stage 1 (from hospital data)          | -0.2321 | 0.0008 |
| 46 | Any Respiratory Disease - Stage 1 (from hospital data)          | -0.1657 | 0.0476 |
| 47 |                                                                 |         |        |
| 48 |                                                                 |         |        |
| 49 |                                                                 |         |        |
| 50 |                                                                 |         |        |
| 51 |                                                                 |         |        |
| 52 |                                                                 |         |        |
| 53 |                                                                 |         |        |
| 54 |                                                                 |         |        |
| 55 |                                                                 |         |        |
| 56 |                                                                 |         |        |
| 57 |                                                                 |         |        |
| 58 |                                                                 |         |        |
| 59 |                                                                 |         |        |
| 60 |                                                                 |         |        |

|    |                                                              |         |        |
|----|--------------------------------------------------------------|---------|--------|
| 1  |                                                              |         |        |
| 2  |                                                              |         |        |
| 3  | Any Respiratory Disease - Stage 3 (from hospital data)       | 0.5038  | <.0001 |
| 4  | Cancer (from any data source)                                | -0.1228 | 0.0560 |
| 5  | Cancer (from drug prescriptions)                             | 0.2540  | <.0001 |
| 6  | Cardiovascular Disease (from drug prescriptions)             | -0.2097 | 0.0046 |
| 7  | Endocrine Disease (from drug prescriptions)                  | -0.0828 | 0.0222 |
| 8  | Genitourinary Disease (from drug prescriptions)              | 0.4347  | <.0001 |
| 9  | Hematologic Disease (from drug prescriptions)                | 0.1757  | 0.0011 |
| 10 | Hepatobiliary Disease (from drug prescriptions)              | 0.6510  | 0.0006 |
| 11 | Neurologic Diseases (from drug prescriptions)                | 0.1086  | 0.0014 |
| 12 | Respiratory Disease (from drug prescriptions)                | 0.1865  | <.0001 |
| 13 | Cardiovascular Disease (from any data source)                | -0.0770 | 0.2400 |
| 14 | Day hospitalization                                          | -0.1056 | 0.0250 |
| 15 | Oral anti-coagulants                                         | 0.1976  | <.0001 |
| 16 | Alpha-blockers                                               | -0.1014 | 0.0038 |
| 17 | Statins                                                      | -0.1832 | <.0001 |
| 18 | Beta-blockers                                                | -0.0628 | 0.0031 |
| 19 | ACE/ARB                                                      | -0.1956 | <.0001 |
| 20 | Calcium channel blockers                                     | -0.0715 | 0.0007 |
| 21 | Nitrates                                                     | 0.1676  | <.0001 |
| 22 | Number of ER visits labeled 'Red'                            | 0.2174  | <.0001 |
| 23 | Total number of ER visits                                    | 0.2167  | <.0001 |
| 24 | Eye Disease (from any data source)                           | -0.1462 | <.0001 |
| 25 | Gynecologic Disease (from any data source)                   | -0.4041 | <.0001 |
| 26 | History of Cancer (from drug prescriptions) *                | 0.1108  | 0.0048 |
| 27 | History of Endocrine Disease (from drug prescriptions) *     | 0.1042  | 0.0016 |
| 28 | History of Neurological Disease (from drug prescriptions) *  | 0.0915  | 0.0011 |
| 29 | History of Psychological Disease (from drug prescriptions) * | 0.0506  | 0.0295 |
| 30 | History of Respiratory Disease (from drug prescriptions) *   | 0.0905  | 0.0002 |
| 31 | History of Aortic Stenosis-Stage 3 *                         | 0.1616  | 0.0515 |
| 32 | History of Arrhythmias-Stage 2 *                             | 0.1000  | 0.0015 |
| 33 | History of Cardiomyopathies-Stage 2 *                        | 0.1681  | 0.0697 |
| 34 | History of Cardiomyopathies-Stage 3 *                        | 0.3151  | 0.0108 |
| 35 | History of Congestive Heart Failure-Stage 3 *                | 0.3407  | <.0001 |
| 36 | History of Coronary Artery Disease-Stage 1 *                 | 0.1753  | <.0001 |
| 37 | History of Coronary Artery Disease-Stage 2 *                 | 0.1517  | 0.0017 |
| 38 | History of Coronary Artery Disease-Stage 3 *                 | 0.1935  | <.0001 |
| 39 | History of Essential Hypertension-Stage 1 *                  | 0.0413  | 0.0434 |
| 40 | History of Diabetes Mellitus Type 1 or Type 2-Stage 1 *      | 0.1886  | <.0001 |
| 41 | History of Diabetes Mellitus Type 1 or Type 2-Stage 2 *      | 0.1483  | 0.0027 |
| 42 | History of Diabetes Mellitus Type 1 or Type 2-Stage 3 *      | 0.1335  | 0.0715 |
| 43 | History of Hypothyroidism-Stage 2 or 3 *                     | 0.1892  | 0.0534 |
| 44 | History of Diverticular Disease-Stage 2 or 3 *               | 0.1638  | 0.0572 |
| 45 | History of Neoplasm, Malignant: Stomach-Stage 3 *            | 0.7712  | 0.0010 |
| 46 | History of Neoplasm, Malignant: Bladder, Urinary-Stage 3 *   | 1.3084  | 0.0182 |
| 47 |                                                              |         |        |
| 48 |                                                              |         |        |
| 49 |                                                              |         |        |
| 50 |                                                              |         |        |
| 51 |                                                              |         |        |
| 52 |                                                              |         |        |
| 53 |                                                              |         |        |
| 54 |                                                              |         |        |
| 55 |                                                              |         |        |
| 56 |                                                              |         |        |
| 57 |                                                              |         |        |
| 58 |                                                              |         |        |
| 59 |                                                              |         |        |
| 60 |                                                              |         |        |

|    |                                                                 |         |        |
|----|-----------------------------------------------------------------|---------|--------|
| 1  |                                                                 |         |        |
| 2  |                                                                 |         |        |
| 3  | History of Neoplasm, Malignant: Kidneys-Stage 3 *               | 0.7219  | 0.0444 |
| 4  | History of Renal Failure-Stage 2 or 3 *                         | 0.2398  | <.0001 |
| 5  |                                                                 |         |        |
| 6  | History of Neoplasm, Malignant: Breast, Female-Stage 1 *        | -0.2279 | 0.0002 |
| 7  | History of Neoplasm, Malignant: Breast, Female-Stage 3 *        | 0.3479  | 0.0056 |
| 8  | History of Neoplasm, Malignant: Ovaries-Stage 1 *               | 0.3945  | 0.0551 |
| 9  |                                                                 |         |        |
| 10 | History of Neoplasm, Malignant: Ovaries-Stage 2 or 3 *          | 0.4745  | 0.0314 |
| 11 | History of Anemia: Aplastic, Acquired-Stage 2 or 3 *            | 0.2900  | 0.0103 |
| 12 | History of Neoplasm, Malignant Hematologic-Stage 2 *            | -0.4900 | 0.0545 |
| 13 | History of Cholecystitis and Cholelithiasis-Stage 1 *           | 0.1010  | 0.0831 |
| 14 | History of Cholecystitis and Cholelithiasis-Stage 2 *           | 0.1793  | 0.0089 |
| 15 | History of Cholecystitis and Cholelithiasis-Stage 3 *           | 0.2803  | 0.0315 |
| 16 |                                                                 |         |        |
| 17 | History of Cirrhosis of the Liver-Stage 2 or 3 *                | 0.2739  | <.0001 |
| 18 | History of Rheumatic Fever-Stage 3 *                            | 0.4281  | 0.0005 |
| 19 |                                                                 |         |        |
| 20 | History of Progressive Systemic Sclerosis-Stage 1 *             | 0.4962  | 0.0004 |
| 21 | History of Cerebrovascular Disease-Stage 1 *                    | 0.1710  | <.0001 |
| 22 | History of Cerebrovascular Disease-Stage 2 *                    | 0.1318  | 0.0003 |
| 23 | History of Cerebrovascular Disease-Stage 3 *                    | 0.2019  | <.0001 |
| 24 | History of Dementia: Primary Degenerative (Alzheimer or Pick)-  |         |        |
| 25 | Stage 1 *                                                       | 0.3755  | <.0001 |
| 26 |                                                                 |         |        |
| 27 | History of Dementia: Primary Degenerative (Alzheimer or Pick)-  |         |        |
| 28 | Stage 2 or 3 *                                                  | 0.4162  | <.0001 |
| 29 | History of Obesity-Stage 2 or 3 *                               | 0.1187  | 0.1089 |
| 30 | History of polypharmacy *                                       | 0.1086  | <.0001 |
| 31 | History of Bipolar Disorder - Manic Episode-Stage 2 *           | 0.3557  | 0.0356 |
| 32 | History of Chronic Obstructive Pulmonary Disease-Stage 1 or 2 * | 0.2343  | <.0001 |
| 33 | History of Chronic Obstructive Pulmonary Disease-Stage 3 *      | 0.6055  | <.0001 |
| 34 | History of Neoplasm, Malignant: Lungs, Bronchi, or Mediastinum- |         |        |
| 35 | Stage 1 *                                                       | 0.3311  | 0.0150 |
| 36 |                                                                 |         |        |
| 37 | History of Pneumonia: Bacterial-Stage 3 *                       | 0.2981  | 0.0013 |
| 38 | History of Oral Anti-coagulants *                               | 0.1008  | 0.0057 |
| 39 | History of Other Cardiovascular drugs *                         | 0.1223  | <.0001 |
| 40 | Musculoskeletal Disease (from any data source)                  | -0.0624 | 0.0065 |
| 41 | Hospitalization                                                 | 0.1280  | 0.0248 |
| 42 | Number of hospitalizations                                      | -0.0643 | 0.0011 |
| 43 | Polypharmacy                                                    | 0.1500  | <.0001 |
| 44 | Psychological Disease (from any data source)                    | 0.1240  | <.0001 |
| 45 | Any of the other 9 Cardiovascular drugs                         | 0.0679  | 0.1160 |
| 46 | Number of the other 9 Cardiovascular drugs                      | 0.1028  | <.0001 |
| 47 |                                                                 |         |        |
| 48 |                                                                 |         |        |
| 49 |                                                                 |         |        |
| 50 |                                                                 |         |        |
| 51 |                                                                 |         |        |
| 52 |                                                                 |         |        |
| 53 |                                                                 |         |        |
| 54 |                                                                 |         |        |
| 55 |                                                                 |         |        |
| 56 |                                                                 |         |        |
| 57 |                                                                 |         |        |
| 58 |                                                                 |         |        |
| 59 |                                                                 |         |        |
| 60 |                                                                 |         |        |

## Males 75-84

| Variable                                              | Coefficient | p-value |
|-------------------------------------------------------|-------------|---------|
| Intercept                                             | -1.0190     | 0.4621  |
| Number of Chronic Conditions (from any data source)=1 | 0.2984      | 0.0003  |

|    |                                                                  |         |        |
|----|------------------------------------------------------------------|---------|--------|
| 1  |                                                                  |         |        |
| 2  |                                                                  |         |        |
| 3  |                                                                  |         |        |
| 4  | Number of Chronic Conditions (from any data source)=2            | 0.5009  | <.0001 |
| 5  | Number of Chronic Conditions (from any data source)=3            | 0.5987  | <.0001 |
| 6  | Number of Chronic Conditions (from any data source)=4            | 0.7284  | <.0001 |
| 7  | Number of Chronic Conditions (from any data source)=5            | 0.7507  | <.0001 |
| 8  | Number of Chronic Conditions (from any data source)=6 or more    | 0.8596  | <.0001 |
| 9  |                                                                  |         |        |
| 10 | Number of Chronic Conditions (from hospital data)=1              | 0.1570  | 0.0049 |
| 11 | Number of Chronic Conditions (from hospital data)=2              | 0.1638  | 0.0317 |
| 12 | Number of Chronic Conditions (from hospital data)=3              | 0.1457  | 0.1301 |
| 13 | Number of Chronic Conditions (from hospital data)=4 or more      | 0.2159  | 0.0857 |
| 14 |                                                                  |         |        |
| 15 | Number of Chronic Conditions (from home health prescription)=1   | 0.3898  | <.0001 |
| 16 | Number of Chronic Conditions (from home health prescription)=2   |         |        |
| 17 | or more                                                          | 0.2645  | 0.0832 |
| 18 |                                                                  |         |        |
| 19 | Number of Chronic Conditions (from drug prescriptions)=1         | -0.2228 | 0.0042 |
| 20 | Number of Chronic Conditions (from drug prescriptions)=2         | -0.2887 | 0.0012 |
| 21 | Number of Chronic Conditions (from drug prescriptions)=3         | -0.2736 | 0.0079 |
| 22 | Number of Chronic Conditions (from drug prescriptions)=4         | -0.3649 | 0.0023 |
| 23 | Number of Chronic Conditions (from drug prescriptions)=5 or more | -0.3187 | 0.0260 |
| 24 |                                                                  |         |        |
| 25 | Reside in Mountain area on 12/ 31/ 2012                          | -0.0273 | 0.4157 |
| 26 | Reside in Hill area on 12/ 31/ 2012                              | 0.0419  | 0.0161 |
| 27 | Age on 12/ 31/ 2012                                              | -0.0638 | 0.0170 |
| 28 |                                                                  |         |        |
| 29 | Cancer (from home health prescription)                           | 0.6146  | <.0001 |
| 30 | Genitourinary Disease (from home health prescription)            | -0.2349 | 0.2216 |
| 31 | Blood Diseases (from home health prescription)                   | 0.5082  | 0.1476 |
| 32 | Infectious Disease (from home health prescription)               | 0.3613  | 0.1489 |
| 33 | Neurologic Diseases (from home health prescription)              | 0.2858  | 0.0007 |
| 34 | Mental Disorders (from home health prescription)                 | 0.1399  | 0.1595 |
| 35 | Respiratory Diseases (from home health prescription)             | 0.1985  | 0.1585 |
| 36 | Cancer (chemo or radiation )                                     | 0.2160  | 0.0058 |
| 37 | Genitourinary (dialysis)                                         | 0.1829  | 0.1227 |
| 38 | Aneurysm, Thoracic-all stages                                    | -0.1892 | 0.2250 |
| 39 | Aortic Stenosis-Stage 1                                          | 0.1531  | 0.1625 |
| 40 | Aortic Stenosis-Stage 3                                          | 0.1564  | 0.2244 |
| 41 | Arrhythmias-Stage 2                                              | -0.1538 | 0.0208 |
| 42 | Cardiomyopathies-Stage 2                                         | -0.1466 | 0.2544 |
| 43 | Cardiomyopathies-Stage 3                                         | 0.3133  | 0.0224 |
| 44 | Conduction Disorders-all stages                                  | -0.1835 | 0.0881 |
| 45 | Congestive Heart Failure-Stage3                                  | 0.2137  | 0.0021 |
| 46 | Coronary Artery Disease-Stage 2                                  | 0.0566  | 0.4552 |
| 47 | Coronary Artery Disease-Stage 3                                  | 0.1414  | 0.0418 |
| 48 | Essential Hypertension-Stage 1                                   | -0.1169 | 0.0073 |
| 49 | Essential Hypertension-Stage 2                                   | -0.2785 | 0.0001 |
| 50 | Essential Hypertension-Stage 3                                   | 0.1298  | 0.0362 |
| 51 | Infective Endocarditis-Stage 3                                   | 0.9736  | 0.0197 |
| 52 |                                                                  |         |        |
| 53 |                                                                  |         |        |
| 54 |                                                                  |         |        |
| 55 |                                                                  |         |        |
| 56 |                                                                  |         |        |
| 57 |                                                                  |         |        |
| 58 |                                                                  |         |        |
| 59 |                                                                  |         |        |
| 60 |                                                                  |         |        |

1  
2  
3  
4  
5  
6  
7  
8  
9  
10  
11  
12  
13  
14  
15  
16  
17  
18  
19  
20  
21  
22  
23  
24  
25  
26  
27  
28  
29  
30  
31  
32  
33  
34  
35  
36  
37  
38  
39  
40  
41  
42  
43  
44  
45  
46  
47  
48  
49  
50  
51  
52  
53  
54  
55  
56  
57  
58  
59  
60

|                                                                 |         |        |
|-----------------------------------------------------------------|---------|--------|
| Mitral Stenosis-Stage 2                                         | -0.3114 | 0.1333 |
| Pericarditis: Viral or Traumatic-Stage 2 or 3                   | -0.8469 | 0.0349 |
| Thrombophlebitis-Stage 1                                        | 0.2275  | 0.1472 |
| Thrombophlebitis-Stage 2 or 3                                   | -0.1048 | 0.4208 |
| Tibial/Iliac/Femoral/Popliteal Artery Disease-Stage 1           | 0.1183  | 0.1409 |
| Tibial/Iliac/Femoral/Popliteal Artery Disease-Stage 2 or 3      | 0.1645  | 0.2385 |
| Diabetes Mellitus Type 1 or Type 2-Stage 2                      | -0.1939 | 0.0562 |
| Diabetes Mellitus Type 1 or Type 2-Stage 3                      | -0.4025 | 0.0333 |
| Hyperthyroidism-Stage 2 or 3                                    | -0.2385 | 0.4296 |
| Hypothyroidism-Stage 1                                          | -0.1541 | 0.2322 |
| Crohns Disease-Stage 1                                          | 0.8307  | 0.0454 |
| Functional Digestive Disorders-Stage 1                          | 0.1566  | 0.1709 |
| Hernia, Hiatal or Reflux Esophagitis-Stage 2 or 3               | 0.7272  | 0.0040 |
| Neoplasm, Malignant: Colon and Rectum-Stage 2                   | -0.4353 | 0.0125 |
| Neoplasm, Malignant: Colon and Rectum-Stage 3                   | -0.2956 | 0.1051 |
| Neoplasm, Malignant: Stomach-Stage 1                            | 0.5695  | 0.0019 |
| Neoplasm, Malignant: Stomach-Stage 3                            | 0.3811  | 0.1781 |
| Calculus of the Urinary Tract-Stage 1                           | -0.1383 | 0.3085 |
| Neoplasm, Malignant: Bladder, Urinary-Stage 3                   | 0.2547  | 0.4352 |
| Neoplasm, Malignant: Kidneys-Stage 1                            | 0.1778  | 0.2881 |
| Renal Failure-Stage 2 or 3                                      | 0.3215  | <.0001 |
| Anemia: Aplastic, Acquired-Stage 2 or 3                         | 0.2550  | 0.2048 |
| Neoplasm, Malignant Hematologic-Stage 1                         | 0.1501  | 0.1974 |
| Neoplasm, Malignant Hematologic-Stage 3                         | -0.8912 | 0.0050 |
| Cholecystitis and Cholelithiasis-Stage 2                        | 0.4441  | 0.0408 |
| Cirrhosis of the Liver-Stage 2 or 3                             | 0.5304  | <.0001 |
| Neoplasm, Malignant: Pancreas-Stage 1                           | 1.1048  | <.0001 |
| Neoplasm, Malignant: Pancreas-Stage 2 or 3                      | 1.2846  | 0.0009 |
| Rheumatic Fever- Stage 2                                        | 0.2675  | 0.0866 |
| Rheumatic Fever- Stage 3                                        | 0.2708  | 0.3136 |
| Neoplasm, Malignant: Prostate-Stage 2                           | -0.3625 | 0.0290 |
| Neoplasm, Malignant: Prostate-Stage 3                           | -0.2814 | 0.1619 |
| Progressive Systemic Sclerosis-Stage 1                          | 1.1059  | 0.1109 |
| Cerebrovascular Disease-Stage 1                                 | 0.1684  | 0.0636 |
| Cerebrovascular Disease-Stage 2                                 | -0.2728 | 0.0094 |
| Cerebrovascular Disease-Stage 3                                 | -0.2874 | 0.0742 |
| Dementia: Primary Degenerative (Alzheimer or Pick)-Stage 1      | 0.4422  | 0.0018 |
| Dementia: Primary Degenerative (Alzheimer or Pick)-Stage 2 or 3 | 0.7034  | 0.0002 |
| Epilepsy-all stages                                             | -0.3392 | 0.0337 |
| Bipolar Disorder - Manic Episode-Stage 1                        | 0.6002  | 0.4877 |
| Depression-Stage 1 or 2                                         | -0.1468 | 0.3176 |
| Drug Abuse, Dependence, Intoxication: Alcohol-Stage 1           | 1.2556  | 0.0028 |
| Drug Abuse, Dependence, Intoxication: Alcohol-Stage 2 or 3      | 0.1890  | 0.3351 |



|    |                                                             |         |        |
|----|-------------------------------------------------------------|---------|--------|
| 1  |                                                             |         |        |
| 2  |                                                             |         |        |
| 3  |                                                             |         |        |
| 4  | Chronic Obstructive Pulmonary Disease-Stage 1 or 2          | 0.0777  | 0.0884 |
| 5  | Chronic Obstructive Pulmonary Disease-Stage 3               | 0.1545  | 0.2047 |
| 6  | Neoplasm, Malignant: Lungs, Bronchi, or Mediastinum-Stage 1 | 0.7063  | <.0001 |
| 7  | Neoplasm, Malignant: Lungs, Bronchi, or Mediastinum-Stage 2 | 0.3644  | 0.2398 |
| 8  | Neoplasm, Malignant: Lungs, Bronchi, or Mediastinum-Stage 3 | 0.3851  | 0.0755 |
| 9  | Pulmonary Embolism-Stage 3                                  | -0.2243 | 0.2238 |
| 10 | Any Cancer - Stage 2 (from hospital data)                   | 0.4412  | 0.0019 |
| 11 | Any Cancer - Stage 3 (from hospital data)                   | 1.2233  | <.0001 |
| 12 | Any Cardiovascular Disease - Stage 1 (from hospital data)   | -0.0637 | 0.2223 |
| 13 | Any Cardiovascular Disease - Stage 2 (from hospital data)   | 0.1167  | 0.1053 |
| 14 | Any Endocrine Disease - Stage 1 (from hospital data)        | -0.1650 | 0.0986 |
| 15 | Any Endocrine Disease - Stage 3 (from hospital data)        | 0.3361  | 0.0522 |
| 16 | Any Ear,Nose,Throat Disease - Stage 1 (from hospital data)  | -0.3128 | 0.1174 |
| 17 | Any Ear,Nose,Throat Disease - Stage 2 (from hospital data)  | -1.4375 | 0.0217 |
| 18 | Any Eye Disease - All stages (from hospital data)           | -0.2230 | 0.0012 |
| 19 | Any Gastrointestinal Disease - Stage 1 (from hospital data) | -0.1736 | 0.0372 |
| 20 | Any Genitourinary Disease - Stage 1 (from hospital data)    | 0.2720  | 0.1932 |
| 21 | Any Genitourinary Disease - Stage 2 (from hospital data)    | 0.3593  | 0.0553 |
| 22 | Any Genitourinary Disease - Stage 3 (from hospital data)    | 0.4935  | 0.0195 |
| 23 | Any Hemotologic Disease - Stage 3 (from hospital data)      | 0.3202  | 0.1946 |
| 24 | Any Hepatobiliary Disease - Stage 2 (from hospital data)    | -0.4870 | 0.0127 |
| 25 | Any Immunologic Disease - All stages (from hospital data)   | 0.3766  | 0.3824 |
| 26 | Any Infectious Disease - Stage 3 (from hospital data)       | 0.2171  | 0.2273 |
| 27 | Any Male Genital System - All stages (from hospital data)   | -0.1061 | 0.0692 |
| 28 | Any Musculoskeletal Disease - Stage 1 (from hospital data)  | -0.1530 | 0.0217 |
| 29 | Any Neurologic Disease - Stage 1 (from hospital data)       | -0.1396 | 0.1837 |
| 30 | Any Neurologic Disease - Stage 2 (from hospital data)       | 0.2235  | 0.0339 |
| 31 | Any Neurologic Disease - Stage 3 (from hospital data)       | 0.3632  | 0.0284 |
| 32 | Any Psychologic Disease - Stage 1 (from hospital data)      | -0.2738 | 0.0487 |
| 33 | Any Psychologic Disease - Stage 3 (from hospital data)      | -0.3812 | 0.0297 |
| 34 | Any Respiratory Disease - Stage 2 (from hospital data)      | 0.2521  | 0.0012 |
| 35 | Any Respiratory Disease - Stage 3 (from hospital data)      | 0.4709  | <.0001 |
| 36 | Any Skin Disease - Stage 1 (from hospital data)             | -0.2014 | 0.1407 |
| 37 | Any Skin Disease - Stage 2 (from hospital data)             | -0.4164 | 0.0263 |
| 38 | Neoplasm, Malignant: Melanoma-Stage 2                       | -0.5839 | 0.1101 |
| 39 | Neoplasm, Malignant: Melanoma-Stage 3                       | 0.6833  | 0.1751 |
| 40 | Cancer (from drug prescriptions)                            | 0.1681  | <.0001 |
| 41 | Cardiovascular Disease (from drug prescriptions)            | -0.2349 | <.0001 |
| 42 | Endocrine Disease (from drug prescriptions)                 | -0.0963 | 0.2515 |
| 43 | Eye Disease (from drug prescriptions)                       | -0.1283 | <.0001 |
| 44 | Genitourinary Disease (from drug prescriptions)             | 0.4556  | <.0001 |
| 45 | Hematologic Disease (from drug prescriptions)               | 0.1419  | 0.0185 |
| 46 | Hepatobiliary Disease (from drug prescriptions)             | 0.5789  | 0.0029 |
| 47 |                                                             |         |        |
| 48 |                                                             |         |        |
| 49 |                                                             |         |        |
| 50 |                                                             |         |        |
| 51 |                                                             |         |        |
| 52 |                                                             |         |        |
| 53 |                                                             |         |        |
| 54 |                                                             |         |        |
| 55 |                                                             |         |        |
| 56 |                                                             |         |        |
| 57 |                                                             |         |        |
| 58 |                                                             |         |        |
| 59 |                                                             |         |        |
| 60 |                                                             |         |        |

|    |                                                                         |         |        |
|----|-------------------------------------------------------------------------|---------|--------|
| 1  |                                                                         |         |        |
| 2  |                                                                         |         |        |
| 3  |                                                                         |         |        |
| 4  | Musculoskeletal Disease (from drug prescriptions)                       | 0.0610  | 0.4251 |
| 5  | Neurologic Diseases (from drug prescriptions)                           | 0.0903  | 0.0217 |
| 6  | Psychological Disease (from drug prescriptions)                         | -0.0954 | 0.2745 |
| 7  | Respiratory Disease (from drug prescriptions)                           | 0.1867  | <.0001 |
| 8  | Skin Disease (from drug prescriptions)                                  | -0.3674 | 0.0144 |
| 9  | Number of day hospitalizations                                          | -0.0412 | 0.1517 |
| 10 | Oral anti-coagulants                                                    | 0.1213  | 0.0014 |
| 11 | Alpha-blockers                                                          | -0.0742 | 0.0360 |
| 12 | Statins                                                                 | -0.1293 | <.0001 |
| 13 | ACE/ARB                                                                 | -0.1708 | <.0001 |
| 14 | Anti-platelets                                                          | 0.0372  | 0.1632 |
| 15 | Calcium channel blockers                                                | -0.0590 | 0.0133 |
| 16 | Digitalis glycosides                                                    | 0.1134  | 0.0086 |
| 17 | Nitrates                                                                | 0.2066  | <.0001 |
| 18 | Diuretics                                                               | 0.0565  | 0.0325 |
| 19 | Endocrine Disease (from any data source)                                | 0.0742  | 0.3637 |
| 20 | Number of ER visits labeled 'Yellow'                                    | -0.1352 | 0.0027 |
| 21 | Total number of ER visits                                               | 0.3208  | <.0001 |
| 22 | Genitourinary Disease (from any data source)                            | 0.1205  | 0.3247 |
| 23 | History of Endocrine Disease (from drug prescriptions) *                | 0.0680  | 0.0589 |
| 24 | History of Neurological Disease (from drug prescriptions) *             | 0.0426  | 0.2080 |
| 25 | History of Psychological Disease (from drug prescriptions) *            | 0.0262  | 0.3867 |
| 26 | History of Respiratory Disease (from drug prescriptions) *              | 0.0918  | 0.0003 |
| 27 | History of Aortic Stenosis-Stage 1 *                                    | -0.1295 | 0.0581 |
| 28 | History of Aortic Stenosis-Stage 3 *                                    | 0.0889  | 0.2974 |
| 29 | History of Arrhythmias-Stage 2 *                                        | 0.0850  | 0.0061 |
| 30 | History of Arrhythmias-Stage 3 *                                        | 0.1402  | 0.0717 |
| 31 | History of Cardiomyopathies-Stage 2 *                                   | 0.1934  | 0.0028 |
| 32 | History of Cardiomyopathies-Stage 3 *                                   | 0.2510  | 0.0033 |
| 33 | History of Congestive Heart Failure-Stage 3 *                           | 0.2257  | <.0001 |
| 34 | History of Coronary Artery Disease-Stage 1 *                            | 0.1133  | <.0001 |
| 35 | History of Coronary Artery Disease-Stage 2 *                            | 0.1341  | 0.0004 |
| 36 | History of Coronary Artery Disease-Stage 3 *                            | 0.0377  | 0.3346 |
| 37 | History of Essential Hypertension-Stage 2 *                             | -0.0501 | 0.1298 |
| 38 | History of Essential Hypertension-Stage 3 *                             | 0.1584  | <.0001 |
| 39 | History of Infective Endocarditis-Stage 3 *                             | -0.3815 | 0.1951 |
| 40 | History of Mitral Stenosis-Stage 3 *                                    | 0.1789  | 0.1632 |
| 41 | History of Pericarditis: Chronic-Stage 2 or 3 *                         | -0.1570 | 0.3956 |
| 42 | History of Pericarditis: Viral or Traumatic-Stage 2 or 3 *              | 0.2146  | 0.2431 |
| 43 | History of Thrombophlebitis-Stage 2 or 3 *                              | -0.1115 | 0.1430 |
| 44 | History of Tibial/Iliac/Femoral/Popliteal Artery Disease-Stage 2 or 3 * | 0.0900  | 0.3217 |
| 45 | hx_Drug-Drug interactions                                               | 0.0611  | 0.0593 |
| 46 |                                                                         |         |        |
| 47 |                                                                         |         |        |
| 48 |                                                                         |         |        |
| 49 |                                                                         |         |        |
| 50 |                                                                         |         |        |
| 51 |                                                                         |         |        |
| 52 |                                                                         |         |        |
| 53 |                                                                         |         |        |
| 54 |                                                                         |         |        |
| 55 |                                                                         |         |        |
| 56 |                                                                         |         |        |
| 57 |                                                                         |         |        |
| 58 |                                                                         |         |        |
| 59 |                                                                         |         |        |
| 60 |                                                                         |         |        |

|    |                                                                                    |         |        |
|----|------------------------------------------------------------------------------------|---------|--------|
| 1  |                                                                                    |         |        |
| 2  |                                                                                    |         |        |
| 3  |                                                                                    |         |        |
| 4  | History of Diabetes Mellitus Type 1 or Type 2-Stage 1 *                            | 0.0914  | 0.0047 |
| 5  | History of Diabetes Mellitus Type 1 or Type 2-Stage 2 *                            | 0.3099  | <.0001 |
| 6  | History of Diabetes Mellitus Type 1 or Type 2-Stage 3 *                            | 0.1290  | 0.0545 |
| 7  | History of Hypothyroidism-Stage 2 or 3 *                                           | 0.2294  | 0.1961 |
| 8  | History of Crohns Disease-Stage 2 or 3 *                                           | 0.8327  | 0.0190 |
| 9  | History of Diverticular Disease-Stage 1 *                                          | 0.1541  | 0.0060 |
| 10 | History of Diverticular Disease-Stage 2 or 3 *                                     | 0.1222  | 0.1954 |
| 11 | History of Neoplasm, Malignant: Colon and Rectum-Stage 3 *                         | 0.4265  | <.0001 |
| 12 | History of Neoplasm, Malignant: Stomach-Stage 3 *                                  | 0.6959  | 0.0011 |
| 13 | History of Neoplasm, Malignant: Bladder, Urinary-Stage 1*                          | -0.0471 | 0.3540 |
| 14 | History of Neoplasm, Malignant: Bladder, Urinary-Stage 3 *                         | 0.3138  | 0.3404 |
| 15 | History of Neoplasm, Malignant: Kidneys-Stage 3 *                                  | 0.3046  | 0.3079 |
| 16 | History of Renal Failure-Stage 2 or 3 *                                            | 0.1469  | <.0001 |
| 17 | History of Anemia: Aplastic, Acquired-Stage 2 or 3 *                               | 0.2973  | 0.0315 |
| 18 | History of Neoplasm, Malignant Hematologic-Stage 1 *                               | 0.2804  | 0.0030 |
| 19 | History of Neoplasm, Malignant Hematologic-Stage 2 *                               | -0.1374 | 0.3846 |
| 20 | History of Cholecystitis and Cholelithiasis-Stage 1 *                              | 0.1693  | 0.0044 |
| 21 | History of Cholecystitis and Cholelithiasis-Stage 2 *                              | 0.1182  | 0.0785 |
| 22 | History of Cholecystitis and Cholelithiasis-Stage 3 *                              | 0.1319  | 0.2852 |
| 23 | History of Cirrhosis of the Liver-Stage 2 or 3 *                                   | 0.2384  | 0.0009 |
| 24 | History of Neoplasm, Malignant: Pancreas-Stage 1 *                                 | -0.5740 | 0.0601 |
| 25 | History of Neoplasm, Malignant: Pancreas-Stage 2 or 3 *                            | 0.5440  | 0.3348 |
| 26 | History of Rheumatic Fever-Stage 2 *                                               | 0.0840  | 0.3429 |
| 27 | History of Neoplasm, Malignant: Prostate-Stage 3 *                                 | 0.1568  | 0.3460 |
| 28 | History of Progressive Systemic Sclerosis-Stage 1 *                                | 0.4957  | 0.3135 |
| 29 | History of Cerebrovascular Disease-Stage 1 *                                       | 0.1907  | <.0001 |
| 30 | History of Cerebrovascular Disease-Stage 2 *                                       | 0.1589  | <.0001 |
| 31 | History of Cerebrovascular Disease-Stage 3 *                                       | 0.1081  | 0.0017 |
| 32 | History of Dementia: Primary Degenerative (Alzheimer or Pick)-<br>Stage 1 *        | 0.3414  | <.0001 |
| 33 | History of Dementia: Primary Degenerative (Alzheimer or Pick)-<br>Stage 2 or 3 *   | 0.6441  | <.0001 |
| 34 | History of Potentially inappropriate prescribing - always to be<br>avoided drugs * | -0.0564 | 0.0053 |
| 35 | History of polypharmacy *                                                          | 0.1075  | <.0001 |
| 36 | History of Depression-Stage 1 or 2 *                                               | 0.0912  | 0.1498 |
| 37 | History of Drug Abuse, Dependence, Intoxication: Alcohol-Stage 2<br>or 3 *         | 0.4811  | <.0001 |
| 38 | History of Chronic Obstructive Pulmonary Disease-Stage 1 or 2 *                    | 0.2667  | <.0001 |
| 39 | History of Chronic Obstructive Pulmonary Disease-Stage 3 *                         | 0.5780  | <.0001 |
| 40 | History of Neoplasm, Malignant: Lungs, Bronchi, or Mediastinum-<br>Stage 1 *       | 0.3130  | 0.0002 |
| 41 | History of Neoplasm, Malignant: Lungs, Bronchi, or Mediastinum-<br>Stage 3 *       | 0.3404  | 0.1018 |
| 42 |                                                                                    |         |        |
| 43 |                                                                                    |         |        |
| 44 |                                                                                    |         |        |
| 45 |                                                                                    |         |        |
| 46 |                                                                                    |         |        |
| 47 |                                                                                    |         |        |
| 48 |                                                                                    |         |        |
| 49 |                                                                                    |         |        |
| 50 |                                                                                    |         |        |
| 51 |                                                                                    |         |        |
| 52 |                                                                                    |         |        |
| 53 |                                                                                    |         |        |
| 54 |                                                                                    |         |        |
| 55 |                                                                                    |         |        |
| 56 |                                                                                    |         |        |
| 57 |                                                                                    |         |        |
| 58 |                                                                                    |         |        |
| 59 |                                                                                    |         |        |
| 60 |                                                                                    |         |        |

|    |                                                    |         |        |
|----|----------------------------------------------------|---------|--------|
| 1  |                                                    |         |        |
| 2  |                                                    |         |        |
| 3  |                                                    |         |        |
| 4  | History of Pneumonia: Bacterial-Stage 2 *          | 0.2648  | 0.1229 |
| 5  | History of Pneumonia: Bacterial-Stage 3 *          | 0.2801  | 0.0001 |
| 6  | History of Pulmonary Embolism-Stage 3 *            | -0.1687 | 0.1666 |
| 7  | History of Neoplasm, Malignant: Melanoma-Stage 3 * | -0.6881 | 0.1493 |
| 8  | History of Oral Anti-coagulants *                  | 0.0418  | 0.2647 |
| 9  | History of Other Cardiovascular drugs *            | 0.1298  | <.0001 |
| 10 | Male Genital System (from any data source)         | -0.2023 | <.0001 |
| 11 | Musculoskeletal Disease (from any data source)     | -0.1057 | 0.1679 |
| 12 | Hospitalization                                    | 0.2060  | <.0001 |
| 13 | Number of hospitalizations                         | -0.0217 | 0.2903 |
| 14 | Polypharmacy                                       | 0.0913  | 0.0005 |
| 15 | Psychological Disease (from any data source)       | 0.2569  | 0.0032 |
| 16 | Cardiovascular Disease (from hospital data)        | 0.0736  | 0.2121 |
| 17 | Endocrine Disease (from hospital data)             | 0.1978  | 0.0758 |
| 18 | Gastrointestinal Disease (from hospital data)      | -0.0878 | 0.2559 |
| 19 | Genitourinary Disease (from hospital data)         | -0.4235 | 0.0770 |
| 20 | Hepatobiliary (from hospital data)                 | -0.1192 | 0.0959 |
| 21 | Neurologic Disease (from hospital data)            | 0.0927  | 0.3439 |
| 22 | Skin Disease (from any data source)                | 0.2454  | 0.0506 |
| 23 | Any of the other 9 Cardiovascular drugs            | 0.0558  | 0.2144 |
| 24 | Number of the other 9 Cardiovascular drugs         | 0.0680  | <.0001 |
| 25 |                                                    |         |        |
| 26 |                                                    |         |        |
| 27 |                                                    |         |        |
| 28 |                                                    |         |        |
| 29 |                                                    |         |        |
| 30 |                                                    |         |        |
| 31 |                                                    |         |        |
| 32 |                                                    |         |        |
| 33 |                                                    |         |        |
| 34 |                                                    |         |        |

### Females 85 and over

| Variable | Coefficient                                                    | p-value |        |
|----------|----------------------------------------------------------------|---------|--------|
| 35       |                                                                |         |        |
| 36       | Intercept                                                      | -4.4541 | <.0001 |
| 37       |                                                                |         |        |
| 38       | Number of Chronic Conditions (from any data source)=1          | 0.1340  | 0.0095 |
| 39       | Number of Chronic Conditions (from any data source)=2          | 0.2527  | <.0001 |
| 40       | Number of Chronic Conditions (from any data source)=3          | 0.3482  | <.0001 |
| 41       | Number of Chronic Conditions (from any data source)=4          | 0.3660  | <.0001 |
| 42       | Number of Chronic Conditions (from any data source)=5          | 0.3330  | 0.0004 |
| 43       | Number of Chronic Conditions (from any data source)=6 or more  | 0.3306  | 0.0032 |
| 44       |                                                                |         |        |
| 45       | Number of Chronic Conditions (from hospital data)=1            | -0.0564 | 0.3573 |
| 46       | Number of Chronic Conditions (from hospital data)=2            | -0.0127 | 0.8565 |
| 47       | Number of Chronic Conditions (from hospital data)=3            | 0.1268  | 0.0996 |
| 48       | Number of Chronic Conditions (from hospital data)=4 or more    | 0.1910  | 0.0340 |
| 49       |                                                                |         |        |
| 50       | Number of Chronic Conditions (from home health prescription)=1 | 0.3946  | <.0001 |
| 51       |                                                                |         |        |
| 52       | Number of Chronic Conditions (from home health prescription)=2 | 0.6315  | <.0001 |
| 53       | or more                                                        |         |        |
| 54       |                                                                |         |        |
| 55       | Number of Chronic Conditions (from drug prescriptions)=1       | -0.0973 | 0.0439 |
| 56       | Number of Chronic Conditions (from drug prescriptions)=2       | -0.1674 | 0.0036 |
| 57       | Number of Chronic Conditions (from drug prescriptions)=3       | -0.1843 | 0.0057 |
| 58       |                                                                |         |        |
| 59       |                                                                |         |        |
| 60       |                                                                |         |        |

|    |                                                                  |         |        |
|----|------------------------------------------------------------------|---------|--------|
| 1  |                                                                  |         |        |
| 2  |                                                                  |         |        |
| 3  | Number of Chronic Conditions (from drug prescriptions)=4         | -0.0790 | 0.3133 |
| 4  | Number of Chronic Conditions (from drug prescriptions)=5 or more | -0.0275 | 0.7718 |
| 5  | Age on 12 /31/ 2012                                              | -0.0002 | <.0001 |
| 6  | Cardiovascular Disease (from home health prescription)           | -0.0967 | 0.0033 |
| 7  | Blood Diseases (from home health prescription)                   | -0.3867 | 0.0183 |
| 8  | Respiratory Diseases (from home health prescription)             | -0.3093 | 0.0020 |
| 9  | Skin Disease (from home health prescription)                     | 0.2047  | 0.0023 |
| 10 | Genitourinary (dialysis)                                         | 0.8709  | 0.0002 |
| 11 | Aortic Stenosis-Stage 3                                          | 0.2778  | 0.0107 |
| 12 | Conduction Disorders-all stages                                  | -0.2408 | 0.0266 |
| 13 | Congestive Heart Failure-Stage3                                  | 0.1248  | 0.0454 |
| 14 | Coronary Artery Disease-Stage 1                                  | -0.1922 | 0.0014 |
| 15 | Coronary Artery Disease-Stage 2                                  | 0.2265  | 0.0047 |
| 16 | Essential Hypertension-Stage 1                                   | -0.3230 | <.0001 |
| 17 | Essential Hypertension-Stage 2                                   | -0.1393 | 0.0052 |
| 18 | Mitral Stenosis-Stage 2                                          | -0.4336 | 0.0440 |
| 19 | Diabetes Mellitus Type 1 or Type 2-Stage 2                       | -0.3893 | 0.0295 |
| 20 | Functional Digestive Disorders-Stage 1                           | 0.2998  | 0.0008 |
| 21 | Hernia, Hiatal or Reflux Esophagitis-Stage 1                     | -0.2273 | 0.0578 |
| 22 | Neoplasm, Malignant: Colon and Rectum-Stage 2                    | -0.9583 | 0.0003 |
| 23 | Renal Failure-Stage 2 or 3                                       | 0.1598  | 0.0010 |
| 24 | Neoplasm, Malignant: Breast, Female-Stage 1                      | -0.4438 | 0.0011 |
| 25 | Anemia: Aplastic, Acquired-Stage 2 or 3                          | 0.9430  | <.0001 |
| 26 | Rheumatic Fever- Stage 2                                         | 0.2483  | 0.0251 |
| 27 | Rheumatic Fever- Stage 3                                         | 0.7922  | <.0001 |
| 28 | Cerebrovascular Disease-Stage 3                                  | 0.7130  | 0.0005 |
| 29 | Dementia: Primary Degenerative (Alzheimer or Pick)-Stage 2 or 3  | 0.2095  | 0.0381 |
| 30 | Bipolar Disorder - Manic Episode-Stage 2                         | 1.3679  | 0.0661 |
| 31 | Any Cancer - Stage 2 (from hospital data)                        | 1.1401  | <.0001 |
| 32 | Any Cancer - Stage 3 (from hospital data)                        | 0.9674  | <.0001 |
| 33 | Any Cardiovascular Disease - Stage 1 (from hospital data)        | 0.2126  | 0.0002 |
| 34 | Any Cardiovascular - Stage 3 (from hospital data)                | 0.1855  | <.0001 |
| 35 | Any Endocrine - Stage 2 (from hospital data)                     | 0.4821  | 0.0015 |
| 36 | Any Gastrointestinal Disease - Stage 1 (from hospital data)      | -0.2081 | 0.0003 |
| 37 | Any Hemotologic Disease - Stage 3 (from hospital data)           | 0.3382  | 0.0529 |
| 38 | Any Musculoskeletal Disease - Stage 1 (from hospital data)       | -0.0783 | 0.0438 |
| 39 | Any Neurologic Disease - Stage 3 (from hospital data)            | -0.4771 | 0.0171 |
| 40 | Any Respiratory Disease - Stage 3 (from hospital data)           | 0.2027  | 0.0040 |
| 41 | Neoplasm, Malignant: Melanoma-Stage 2                            | -1.4509 | 0.0019 |
| 42 | Cardiovascular Disease (from drug prescriptions)                 | -0.2006 | <.0001 |
| 43 | Endocrine Disease (from drug prescriptions)                      | -0.1009 | 0.0041 |
| 44 | Genitourinary Disease (from drug prescriptions)                  | 0.2622  | 0.0004 |
| 45 | Hematologic Disease (from drug prescriptions)                    | 0.1242  | 0.0087 |
| 46 | Hepatobiliary Disease (from drug prescriptions)                  | 0.8195  | 0.0083 |
| 47 |                                                                  |         |        |
| 48 |                                                                  |         |        |
| 49 |                                                                  |         |        |
| 50 |                                                                  |         |        |
| 51 |                                                                  |         |        |
| 52 |                                                                  |         |        |
| 53 |                                                                  |         |        |
| 54 |                                                                  |         |        |
| 55 |                                                                  |         |        |
| 56 |                                                                  |         |        |
| 57 |                                                                  |         |        |
| 58 |                                                                  |         |        |
| 59 |                                                                  |         |        |
| 60 |                                                                  |         |        |

|    |                                                                              |         |        |
|----|------------------------------------------------------------------------------|---------|--------|
| 1  |                                                                              |         |        |
| 2  |                                                                              |         |        |
| 3  | Oral anti-coagulants                                                         | -0.0905 | 0.0222 |
| 4  | Statins                                                                      | -0.2123 | <.0001 |
| 5  | ACE/ARB                                                                      | -0.1098 | <.0001 |
| 6  | Calcium channel blockers                                                     | -0.0802 | 0.0002 |
| 7  | Anti-arrhythmics                                                             | 0.0988  | 0.0106 |
| 8  | Digitalis glycosides                                                         | 0.1114  | 0.0002 |
| 9  | Nitrates                                                                     | 0.1279  | <.0001 |
| 10 | Diuretics                                                                    | 0.0611  | 0.0088 |
| 11 | Number of ER visits labeled 'Yellow'                                         | -0.2129 | 0.0004 |
| 12 | Total number of ER visits                                                    | 0.4649  | <.0001 |
| 13 | Eye Disease (from any data source)                                           | -0.1404 | <.0001 |
| 14 | History of Cancer (from drug prescriptions) *                                | 0.1381  | 0.0002 |
| 15 | History of Endocrine Disease (from drug prescriptions) *                     | 0.1108  | 0.0005 |
| 16 | History of Psychological Disease (from drug prescriptions) *                 | 0.0824  | <.0001 |
| 17 | History of Respiratory Disease (from drug prescriptions) *                   | 0.0686  | 0.0043 |
| 18 | History of Aortic Stenosis-Stage 1 *                                         | 0.1279  | 0.0492 |
| 19 | History of Aortic Stenosis-Stage 3 *                                         | 0.3272  | <.0001 |
| 20 | History of Arrhythmias-Stage 2 *                                             | 0.1359  | <.0001 |
| 21 | History of Cardiomyopathies-Stage 3 *                                        | 0.4752  | 0.0004 |
| 22 | History of Congestive Heart Failure-Stage 3 *                                | 0.1905  | <.0001 |
| 23 | History of Coronary Artery Disease-Stage 1 *                                 | 0.0616  | 0.0342 |
| 24 | History of Coronary Artery Disease-Stage 2 *                                 | 0.1270  | 0.0059 |
| 25 | History of Essential Hypertension-Stage 3 *                                  | 0.1426  | <.0001 |
| 26 | History of Mitral Stenosis-Stage 2 *                                         | 0.2121  | 0.0393 |
| 27 | History of Mitral Stenosis-Stage 3 *                                         | 0.2109  | 0.0254 |
| 28 | History of Tibial/Iliac/Femoral/Popliteal Artery Disease-Stage 2 or 3 *      | 0.1684  | 0.0609 |
| 29 | History of Diabetes Mellitus Type 1 or Type 2-Stage 1 *                      | 0.0983  | 0.0030 |
| 30 | History of Neoplasm, Malignant: Kidneys-Stage 1 *                            | 0.3075  | 0.0501 |
| 31 | History of Renal Failure-Stage 2 or 3 *                                      | 0.1614  | <.0001 |
| 32 | History of Neoplasm, Malignant: Breast, Female-Stage 3 *                     | 0.5190  | 0.0032 |
| 33 | History of Anemia: Aplastic, Acquired-Stage 2 or 3 *                         | 0.3169  | 0.0038 |
| 34 | History of Neoplasm, Malignant Hematologic-Stage 1 *                         | 0.2489  | 0.0263 |
| 35 | History of Cholecystitis and Cholelithiasis-Stage 1 *                        | 0.1278  | 0.0084 |
| 36 | History of Cirrhosis of the Liver-Stage 2 or 3 *                             | 0.1977  | 0.0150 |
| 37 | History of Rheumatic Fever-Stage 2 *                                         | 0.1641  | 0.0171 |
| 38 | History of Rheumatic Fever-Stage 3 *                                         | 0.4295  | <.0001 |
| 39 | History of Cerebrovascular Disease-Stage 1 *                                 | 0.1780  | <.0001 |
| 40 | History of Cerebrovascular Disease-Stage 2 *                                 | 0.1248  | 0.0001 |
| 41 | History of Cerebrovascular Disease-Stage 3 *                                 | 0.2010  | <.0001 |
| 42 | History of Dementia: Primary Degenerative (Alzheimer or Pick)-Stage 1 *      | 0.2327  | <.0001 |
| 43 | History of Dementia: Primary Degenerative (Alzheimer or Pick)-Stage 2 or 3 * | 0.3112  | <.0001 |
| 44 | History of polypharmacy *                                                    | 0.0412  | 0.0637 |
| 45 |                                                                              |         |        |
| 46 |                                                                              |         |        |
| 47 |                                                                              |         |        |
| 48 |                                                                              |         |        |
| 49 |                                                                              |         |        |
| 50 |                                                                              |         |        |
| 51 |                                                                              |         |        |
| 52 |                                                                              |         |        |
| 53 |                                                                              |         |        |
| 54 |                                                                              |         |        |
| 55 |                                                                              |         |        |
| 56 |                                                                              |         |        |
| 57 |                                                                              |         |        |
| 58 |                                                                              |         |        |
| 59 |                                                                              |         |        |
| 60 |                                                                              |         |        |

|                                                                 |         |        |
|-----------------------------------------------------------------|---------|--------|
| History of Chronic Obstructive Pulmonary Disease-Stage 1 or 2 * | 0.1641  | <.0001 |
| History of Chronic Obstructive Pulmonary Disease-Stage 3 *      | 0.2718  | 0.0010 |
| History of Pneumonia: Bacterial-Stage 3 *                       | 0.2305  | 0.0024 |
| History of Oral Anti-coagulants *                               | 0.1412  | 0.0001 |
| History of Other Cardiovascular drugs *                         | 0.0945  | 0.0002 |
| Musculoskeletal Disease (from any data source)                  | -0.1212 | <.0001 |
| Hospitalization                                                 | 0.4053  | <.0001 |
| Number of hospitalizations                                      | -0.0572 | 0.0152 |
| Polypharmacy                                                    | 0.0686  | 0.0047 |
| Psychological Disease (from any data source)                    | 0.0241  | 0.3329 |
| Respiratory Disease (from any data source)                      | 0.1452  | <.0001 |
| Cancer (from hospital data)                                     | 0.1946  | 0.0015 |
| Number of the other 9 Cardiovascular drugs                      | 0.0343  | 0.0067 |

### Males 85 and over

| Variable                                                               | Coefficient | p-value |
|------------------------------------------------------------------------|-------------|---------|
| Intercept                                                              | -6.5943     | <.0001  |
| Number of Chronic Conditions (from any data source)=1                  | 0.0148      | 0.7836  |
| Number of Chronic Conditions (from any data source)=2                  | 0.0567      | 0.3273  |
| Number of Chronic Conditions (from any data source)=3                  | 0.1133      | 0.0832  |
| Number of Chronic Conditions (from any data source)=4                  | 0.1108      | 0.1382  |
| Number of Chronic Conditions (from any data source)=5                  | 0.1027      | 0.2348  |
| Number of Chronic Conditions (from any data source)=6 or more          | -0.00058    | 0.9956  |
| Number of Chronic Conditions (from hospital data)=1                    | 0.2260      | <.0001  |
| Number of Chronic Conditions (from hospital data)=2                    | 0.3490      | <.0001  |
| Number of Chronic Conditions (from hospital data)=3                    | 0.3454      | <.0001  |
| Number of Chronic Conditions (from hospital data)=4 or more            | 0.2443      | 0.0024  |
| Number of Chronic Conditions (from home health prescription)=1         | 0.5620      | <.0001  |
| Number of Chronic Conditions (from home health prescription)=2 or more | 0.9112      | <.0001  |
| Age on 12/ 31/ 2012                                                    | 0.0552      | <.0001  |
| Cardiovascular Disease (from home health prescription)                 | -0.1808     | 0.0009  |
| Neurologic Diseases (from home health prescription)                    | -0.2313     | 0.0125  |
| Cancer (chemo or radiation )                                           | 0.4807      | 0.0028  |
| Aortic Stenosis-Stage 3                                                | 0.3770      | 0.0178  |
| Coronary Artery Disease-Stage 2                                        | 0.1810      | 0.0345  |
| Essential Hypertension-Stage 1                                         | -0.1334     | 0.0049  |
| Mitral Stenosis-Stage 3                                                | 0.7232      | 0.0092  |
| Crohns Disease-Stage 2 or 3                                            | 2.0123      | 0.0823  |
| Renal Failure-Stage 2 or 3                                             | 0.2166      | <.0001  |
| Neoplasm, Malignant Hematologic-Stage 2                                | 0.9737      | 0.0279  |
| Cerebrovascular Disease-Stage 2                                        | -0.3039     | 0.0005  |

|    |                                                                             |         |        |
|----|-----------------------------------------------------------------------------|---------|--------|
| 1  |                                                                             |         |        |
| 2  |                                                                             |         |        |
| 3  | Dementia: Primary Degenerative (Alzheimer or Pick)-Stage 1                  | 0.4636  | 0.0033 |
| 4  | Neoplasm, Malignant: Lungs, Bronchi, or Mediastinum-Stage 1                 | 1.0085  | <.0001 |
| 5  | Any Cancer - Stage 3 (from hospital data)                                   | 1.2151  | <.0001 |
| 6  | Any Cardiovascular - Stage 3 (from hospital data)                           | 0.1683  | 0.0006 |
| 7  | Any Eye Disease – All stages (from hospital data)                           | -0.3186 | 0.0024 |
| 8  | Any Psychologic Disease - Stage 1 (from hospital data)                      | -0.3000 | 0.0483 |
| 9  | Any Psychologic Disease - Stage 2 (from hospital data)                      | 0.3406  | 0.0468 |
| 10 | Cancer (from any data source)                                               | 0.0881  | 0.0255 |
| 11 | Cardiovascular Disease (from drug prescriptions)                            | -0.0958 | 0.0203 |
| 12 | Eye Disease (from drug prescriptions)                                       | -0.1138 | 0.0019 |
| 13 | Genitourinary Disease (from drug prescriptions)                             | 0.3297  | 0.0004 |
| 14 | Hepatobiliary Disease (from drug prescriptions)                             | 1.1786  | 0.0031 |
| 15 | Respiratory Disease (from drug prescriptions)                               | 0.2047  | <.0001 |
| 16 | Day hospitalization                                                         | -0.2140 | 0.0003 |
| 17 | Statins                                                                     | -0.1823 | <.0001 |
| 18 | ACE/ARB                                                                     | -0.1220 | <.0001 |
| 19 | Digitalis glycosides                                                        | 0.1380  | 0.0011 |
| 20 | Nitrates                                                                    | 0.1895  | <.0001 |
| 21 | Diuretics                                                                   | 0.1133  | <.0001 |
| 22 | Number of ER visits labeled 'Yellow'                                        | -0.3232 | <.0001 |
| 23 | Total number of ER visits                                                   | 0.5087  | <.0001 |
| 24 | Genitourinary Disease (from any data source)                                | 0.1686  | 0.0037 |
| 25 | Hematologic Disease (from any data source)                                  | 0.1699  | 0.0006 |
| 26 | History of Endocrine Disease (from drug prescriptions) *                    | 0.0877  | 0.0078 |
| 27 | History of Psychological Disease (from drug prescriptions) *                | 0.1168  | 0.0009 |
| 28 | History of Aortic Stenosis-Stage 3 *                                        | 0.3893  | 0.0002 |
| 29 | History of Arrhythmias-Stage 2 *                                            | 0.1078  | 0.0013 |
| 30 | History of Congestive Heart Failure-Stage 3 *                               | 0.2010  | 0.0002 |
| 31 | History of Coronary Artery Disease-Stage 1 *                                | 0.1312  | 0.0002 |
| 32 | History of Coronary Artery Disease-Stage 2 *                                | 0.1103  | 0.0392 |
| 33 | History of Coronary Artery Disease-Stage 3 *                                | 0.1075  | 0.0476 |
| 34 | History of Essential Hypertension-Stage 3 *                                 | 0.1204  | 0.0079 |
| 35 | History of Pericarditis: Viral or Traumatic-Stage 2 or 3 *                  | -0.7456 | 0.0101 |
| 36 | History of Diabetes Mellitus Type 1 or Type 2-Stage 1 *                     | 0.1159  | 0.0141 |
| 37 | History of Neoplasm, Malignant: Bladder, Urinary-Stage 1 *                  | 0.1311  | 0.0546 |
| 38 | History of Renal Failure-Stage 2 or 3 *                                     | 0.1660  | <.0001 |
| 39 | History of Neoplasm, Malignant Hematologic-Stage 1 *                        | 0.3476  | 0.0069 |
| 40 | History of Neoplasm, Malignant Hematologic-Stage 2 *                        | -1.1984 | 0.0057 |
| 41 | History of Cirrhosis of the Liver-Stage 2 or 3 *                            | 0.2949  | 0.0083 |
| 42 | History of Progressive Systemic Sclerosis-Stage 1 *                         | 2.4748  | 0.0284 |
| 43 | History of Cerebrovascular Disease-Stage 1 *                                | 0.2552  | <.0001 |
| 44 | History of Cerebrovascular Disease-Stage 3 *                                | 0.1474  | 0.0006 |
| 45 | History of Dementia: Primary Degenerative (Alzheimer or Pick)-<br>Stage 1 * | 0.2598  | <.0001 |
| 46 |                                                                             |         |        |
| 47 |                                                                             |         |        |
| 48 |                                                                             |         |        |
| 49 |                                                                             |         |        |
| 50 |                                                                             |         |        |
| 51 |                                                                             |         |        |
| 52 |                                                                             |         |        |
| 53 |                                                                             |         |        |
| 54 |                                                                             |         |        |
| 55 |                                                                             |         |        |
| 56 |                                                                             |         |        |
| 57 |                                                                             |         |        |
| 58 |                                                                             |         |        |
| 59 |                                                                             |         |        |
| 60 |                                                                             |         |        |



|    |                                                                 |         |        |
|----|-----------------------------------------------------------------|---------|--------|
| 1  |                                                                 |         |        |
| 2  |                                                                 |         |        |
| 3  | History of Dementia: Primary Degenerative (Alzheimer or Pick)-  | 0.2971  | 0.0457 |
| 4  | Stage 2 or 3 *                                                  |         |        |
| 5  | History of Potentially inappropriate prescribing - always to be | -0.0705 | 0.0104 |
| 6  | avoided drugs *                                                 |         |        |
| 7  | History of polypharmacy *                                       | 0.1276  | 0.0001 |
| 8  | History of Chronic Obstructive Pulmonary Disease-Stage 1 or 2 * | 0.2083  | <.0001 |
| 9  | History of Chronic Obstructive Pulmonary Disease-Stage 3 *      | 0.2686  | 0.0030 |
| 10 | History of Neoplasm, Malignant: Lungs, Bronchi, or Mediastinum- | 0.4042  | 0.0142 |
| 11 | Stage 1 *                                                       |         |        |
| 12 | History of Pneumonia: Bacterial-Stage 2 *                       | 0.4137  | 0.0392 |
| 13 | History of Other Cardiovascular drugs *                         | 0.1277  | 0.0005 |
| 14 | Immunologic Disease (from any data source)                      | 0.9577  | 0.0461 |
| 15 | Male Genital System (from any data source)                      | -0.1301 | <.0001 |
| 16 | Neurologic Disease (from any data source)                       | 0.1639  | <.0001 |
| 17 | Polypharmacy                                                    | 0.0778  | 0.0206 |
| 18 | Psychological Disease (from any data source)                    | 0.1247  | 0.0017 |
| 19 | Endocrine Disease (from hospital data)                          | 0.1413  | 0.0154 |
| 20 | Respiratory Disease (from hospital data)                        | 0.3324  | <.0001 |
| 21 |                                                                 |         |        |
| 22 |                                                                 |         |        |
| 23 |                                                                 |         |        |
| 24 |                                                                 |         |        |
| 25 |                                                                 |         |        |
| 26 |                                                                 |         |        |
| 27 |                                                                 |         |        |
| 28 |                                                                 |         |        |
| 29 |                                                                 |         |        |
| 30 |                                                                 |         |        |
| 31 |                                                                 |         |        |
| 32 |                                                                 |         |        |
| 33 |                                                                 |         |        |
| 34 |                                                                 |         |        |
| 35 |                                                                 |         |        |
| 36 |                                                                 |         |        |
| 37 |                                                                 |         |        |
| 38 |                                                                 |         |        |
| 39 |                                                                 |         |        |
| 40 |                                                                 |         |        |
| 41 |                                                                 |         |        |
| 42 |                                                                 |         |        |
| 43 |                                                                 |         |        |
| 44 |                                                                 |         |        |
| 45 |                                                                 |         |        |
| 46 |                                                                 |         |        |
| 47 |                                                                 |         |        |
| 48 |                                                                 |         |        |
| 49 |                                                                 |         |        |
| 50 |                                                                 |         |        |
| 51 |                                                                 |         |        |
| 52 |                                                                 |         |        |
| 53 |                                                                 |         |        |
| 54 |                                                                 |         |        |
| 55 |                                                                 |         |        |
| 56 |                                                                 |         |        |
| 57 |                                                                 |         |        |
| 58 |                                                                 |         |        |
| 59 |                                                                 |         |        |
| 60 |                                                                 |         |        |

## Predicting Risk Using a Population Based Longitudinal Database

Louis et al

## STROBE Statement—checklist of items that should be included in reports of observational studies

|                           | Item No | Recommendation                                                                                                                                                                                                                                                                                                    |                                                                                                                                |
|---------------------------|---------|-------------------------------------------------------------------------------------------------------------------------------------------------------------------------------------------------------------------------------------------------------------------------------------------------------------------|--------------------------------------------------------------------------------------------------------------------------------|
| <b>Title and abstract</b> | 1       | (a) Indicate the study's design with a commonly used term in the title or the abstract                                                                                                                                                                                                                            | See abstract section: Design.                                                                                                  |
|                           |         | (b) Provide in the abstract an informative and balanced summary of what was done and what was found                                                                                                                                                                                                               | The outcome measures used and what was found are summarized in the sections of the abstract: Main outcome measures and Results |
| <b>Introduction</b>       |         |                                                                                                                                                                                                                                                                                                                   |                                                                                                                                |
| Background/rationale      | 2       | Explain the scientific background and rationale for the investigation being reported                                                                                                                                                                                                                              | See the Introduction section pages 4 and 5                                                                                     |
| Objectives                | 3       | State specific objectives, including any prespecified hypotheses                                                                                                                                                                                                                                                  | Our objectives are described in the last two paragraphs of the Introduction                                                    |
| <b>Methods</b>            |         |                                                                                                                                                                                                                                                                                                                   |                                                                                                                                |
| Study design              | 4       | Present key elements of study design early in the paper                                                                                                                                                                                                                                                           | See last paragraph of the Introduction and the Methods section                                                                 |
| Setting                   | 5       | Describe the setting, locations, and relevant dates, including periods of recruitment, exposure, follow-up, and data collection                                                                                                                                                                                   | See <u>Study Data and Study Population</u> at beginning of Methods section                                                     |
| Participants              | 6       | (a) <i>Cohort study</i> —Give the eligibility criteria, and the sources and methods of selection of participants. Describe methods of follow-up                                                                                                                                                                   | Our study includes 100% of the adult population<br>See <u>Study Data and Study Population</u> at beginning of Methods section  |
|                           |         | (b) <i>Cohort study</i> —Give the eligibility criteria, and the sources and methods of case ascertainment and control selection. Give the rationale for the choice of cases and controls<br><i>Cross-sectional study</i> —Give the eligibility criteria, and the sources and methods of selection of participants |                                                                                                                                |
|                           |         | (b) <i>Cohort study</i> —For matched studies, give matching criteria and number of exposed and unexposed                                                                                                                                                                                                          |                                                                                                                                |
|                           |         | <i>Case-control study</i> —For matched studies, give matching criteria and the number of controls per case                                                                                                                                                                                                        |                                                                                                                                |
| Variables                 | 7       | Clearly define all outcomes, exposures, predictors, potential confounders, and effect modifiers. Give diagnostic criteria, if applicable                                                                                                                                                                          | See the Dependent variable and Independent variable sections in the Methods section                                            |
| Data sources/ measurement | 8*      | For each variable of interest, give sources of data                                                                                                                                                                                                                                                               | See the Dependent variable                                                                                                     |

|                        |     |                                                                                                                                                                                                                                                                                                           |                                                                                                                                                                              |
|------------------------|-----|-----------------------------------------------------------------------------------------------------------------------------------------------------------------------------------------------------------------------------------------------------------------------------------------------------------|------------------------------------------------------------------------------------------------------------------------------------------------------------------------------|
|                        |     | and details of methods of assessment (measurement). Describe comparability of assessment methods if there is more than one group                                                                                                                                                                          | and Independent variable sections in the Methods section. In addition we have included an Appendix with detailed mapping to independent variable.                            |
| Bias                   | 9   | Describe any efforts to address potential sources of bias                                                                                                                                                                                                                                                 | See Evaluation of the Models (page 10) in the Methods section                                                                                                                |
| Study size             | 10  | Explain how the study size was arrived at                                                                                                                                                                                                                                                                 | Our study includes 100% of the adult population                                                                                                                              |
| Quantitative variables | 11  | Explain how quantitative variables were handled in the analyses. If applicable, describe which groupings were chosen and why                                                                                                                                                                              | See the Dependent variable and Independent variable sections in the Methods section. In addition we have included an Appendix with detailed mapping to independent variable. |
| Statistical methods    | 12  | (a) Describe all statistical methods, including those used to control for confounding                                                                                                                                                                                                                     | See the Modelling section and Evaluation of the Models section (pages 9 and 10) of the Methods                                                                               |
|                        |     | (b) Describe any methods used to examine subgroups and interactions                                                                                                                                                                                                                                       | See the Modelling section (pages 9 and 10) of the Methods                                                                                                                    |
|                        |     | (c) Explain how missing data were addressed                                                                                                                                                                                                                                                               |                                                                                                                                                                              |
|                        |     | (d) <i>Cohort study</i> —If applicable, explain how loss to follow-up was addressed<br><i>Case-control study</i> —If applicable, explain how matching of cases and controls was addressed<br><i>Cross-sectional study</i> —If applicable, describe analytical methods taking account of sampling strategy | Our study includes 100% of the adult population                                                                                                                              |
|                        |     | (e) Describe any sensitivity analyses                                                                                                                                                                                                                                                                     | See Evaluation of the Models last paragraph of Methods.                                                                                                                      |
| <b>Results</b>         |     |                                                                                                                                                                                                                                                                                                           |                                                                                                                                                                              |
| Participants           | 13* | (a) Report numbers of individuals at each stage of study—eg numbers potentially eligible, examined for eligibility, confirmed eligible, included in the study, completing follow-up, and analysed                                                                                                         | See Page 11 Results section                                                                                                                                                  |
|                        |     | (b) Give reasons for non-participation at each stage                                                                                                                                                                                                                                                      | N/A                                                                                                                                                                          |
|                        |     | (c) Consider use of a flow diagram                                                                                                                                                                                                                                                                        |                                                                                                                                                                              |
| Descriptive data       | 14* | (a) Give characteristics of study participants (eg demographic, clinical, social) and information on exposures and potential confounders                                                                                                                                                                  | See Table 1 and Results section (page 11-14)                                                                                                                                 |
|                        |     | (b) Indicate number of participants with missing data for each variable of interest                                                                                                                                                                                                                       |                                                                                                                                                                              |

|                          |     |                                                                                                                                                                                                              |                                                                          |
|--------------------------|-----|--------------------------------------------------------------------------------------------------------------------------------------------------------------------------------------------------------------|--------------------------------------------------------------------------|
|                          |     | (c) <i>Cohort study</i> —Summarise follow-up time (eg, average and total amount)                                                                                                                             | N/A                                                                      |
| Outcome data             | 15* | <i>Cohort study</i> —Report numbers of outcome events or summary measures over time                                                                                                                          |                                                                          |
|                          |     | <i>Case-control study</i> —Report numbers in each exposure category, or summary measures of exposure                                                                                                         |                                                                          |
|                          |     | <i>Cross-sectional study</i> —Report numbers of outcome events or summary measures                                                                                                                           | See Table 2 and figure and pages 14 and 15 of Results section            |
| Main results             | 16  | (a) Give unadjusted estimates and, if applicable, confounder-adjusted estimates and their precision (eg, 95% confidence interval). Make clear which confounders were adjusted for and why they were included | See pages 13                                                             |
|                          |     | (b) Report category boundaries when continuous variables were categorized                                                                                                                                    |                                                                          |
|                          |     | (c) If relevant, consider translating estimates of relative risk into absolute risk for a meaningful time period                                                                                             |                                                                          |
| Other analyses           | 17  | Report other analyses done—eg analyses of subgroups and interactions, and sensitivity analyses                                                                                                               | See Table 2 and page 13 and 14.                                          |
| <b>Discussion</b>        |     |                                                                                                                                                                                                              |                                                                          |
| Key results              | 18  | Summarise key results with reference to study objectives                                                                                                                                                     | See Discussion section page 16                                           |
| Limitations              | 19  | Discuss limitations of the study, taking into account sources of potential bias or imprecision. Discuss both direction and magnitude of any potential bias                                                   | See Discussion section pages 17 and 18                                   |
| Interpretation           | 20  | Give a cautious overall interpretation of results considering objectives, limitations, multiplicity of analyses, results from similar studies, and other relevant evidence                                   | See Discussion section page 18                                           |
| Generalisability         | 21  | Discuss the generalisability (external validity) of the study results                                                                                                                                        | See Discussion section pages 18 and 19                                   |
| <b>Other information</b> |     |                                                                                                                                                                                                              |                                                                          |
| Funding                  | 22  | Give the source of funding and the role of the funders for the present study and, if applicable, for the original study on which the present article is based                                                | The study was funded by the Emilia-Romagna, region of Italy. See page 3. |

\*Give information separately for cases and controls in case-control studies and, if applicable, for exposed and unexposed groups in cohort and cross-sectional studies.

**Note:** An Explanation and Elaboration article discusses each checklist item and gives methodological background and published examples of transparent reporting. The STROBE checklist is best used in conjunction with this article (freely available on the Web sites of PLoS Medicine at <http://www.plosmedicine.org/>, Annals of Internal Medicine at <http://www.annals.org/>, and Epidemiology at <http://www.epidem.com/>). Information on the STROBE Initiative is available at [www.strobe-statement.org](http://www.strobe-statement.org).
